# Supplementary material for: Mine subsidence monitoring and prediction integrating SBAS-InSAR technology and BO-Prophet model
Source: PeerJ journal article supplement (doi:10.7717/peerj-cs.3327), 2025-10-28
Supplement: Figure10b.xlsx [file Figure10b.xlsx]

## Sheet: Sheet1
time	P1	P2	P3	P4	P5	P6
2023-06-23	0	0	0	0	0	0
2023-07-05	-12.2649	-16.8364	-7.5068	-1.75533	-5.31748	-7.67135
2023-07-17	-11.257	-16.6048	-2.19167	1.74172	-1.90899	-2.27085
2023-07-29	-8.48867	-3.03452	-10.5586	-2.38515	-3.9414	-5.26009
2023-08-10	-12.2633	-22.4796	-4.39125	8.45302	13.466	-0.669485
2023-08-22	-9.18758	-16.0081	2.35851	4.31536	1.97745	-7.3044
2023-09-03	-14.6616	-20.817	-5.98557	-5.29893	-7.54529	-15.3804
2023-09-15	-15.8275	-17.2757	-0.980539	-3.37138	-7.53593	-8.12493
2023-09-27	-16.1217	-22.4743	-12.4681	-10.9946	-14.7568	-11.0874
2023-10-09	-21.5011	-28.2493	-18.9578	-18.7181	-20.5079	-17.6732
2023-10-21	-19.4299	-25.0983	-20.4295	-22.8419	-20.3271	-15.4718
2023-11-02	-30.3533	-34.7388	-16.5152	-6.00389	-15.4723	-19.7324
2023-11-14	-30.2758	-35.7261	-20.6474	-14.9445	-20.3339	-21.3573
2023-11-26	-35.1695	-38.6708	-22.3114	-18.6099	-25.4035	-18.3463
2023-12-08	-36.3776	-40.8592	-26.9256	-18.9216	-24.217	-20.7379
2023-12-20	-37.1556	-43.8697	-27.4554	-14.1527	-23.7063	-19.7656
2024-01-13	-41.1582	-44.631	-26.3837	-18.4584	-26.0022	-22.9963
2024-01-25	-47.2163	-51.3365	-32.379	-22.9638	-28.1775	-23.4159
2024-02-06	-48.2914	-53.3277	-37.5776	-28.8078	-35.1898	-32.7364
2024-02-18	-49.3272	-55.4188	-40.3995	-27.192	-28.491	-28.5576
2024-03-01	-48.2774	-53.1109	-38.7238	-29.4547	-34.7728	-28.4669
2024-03-13	-54.4022	-59.4152	-44.5294	-35.2336	-42.181	-38.2084
2024-03-25	-56.9829	-63.634	-50.2545	-40.86	-44.0585	-39.3946
2024-04-06	-56.2903	-62.0462	-48.8937	-41.461	-47.1929	-44.68
2024-04-18	-55.435	-61.7671	-49.5273	-42.8499	-48.8795	-47.4701
2024-04-30	-58.3986	-66.0497	-53.8467	-47.8382	-54.0308	-51.5443
2024-05-12	-65.052	-71.4428	-59.2974	-51.9261	-56.7322	-52.7989
2024-05-24	-64.9243	-72.3646	-60.8844	-51.8439	-57.0459	-50.9257
2024-06-05	-69.5631	-77.4684	-67.2738	-58.6764	-62.4759	-56.4873
2024-06-17	-67.8743	-74.5201	-62.9377	-55.0854	-60.1117	-54.1398
2024-06-29	-75.7203	-83.7603	-72.5956	-63.9272	-69.0565	-63.4266
2024-07-11	-69.2973	-77.0053	-65.6255	-57.1803	-63.0159	-58.3195
2024-07-23	-69.7538	-78.2953	-68.9728	-59.9725	-65.1557	-59.2643
2024-08-04	-64.4819	-75.2311	-64.2137	-55.3927	-62.5924	-62.7049
