# Supplementary material for: Mine subsidence monitoring and prediction integrating SBAS-InSAR technology and BO-Prophet model
Source: PeerJ journal article supplement (doi:10.7717/peerj-cs.3327), 2025-10-28
Supplement: Figure11.xlsx [file Figure11.xlsx]

## Sheet: Sheet1
SBAS-InSAR								LSTM							Prophet
	P1	P2	P3	P4	P5	P6		P1	P2	P3	P4	P5	P6		P1	P2	P3	P4	P5	P6
2024-05-24	-64.9243	-72.3646	-60.8844	-51.8439	-57.0459	-50.9257		-63.5933	-71.2794	-59.8924	-53.1821	-57.7383	-55.367		-65.5143	-72.4536	-60.094	-52.2306	-57.32	-51.5084
2024-06-05	-69.5631	-77.4684	-67.2738	-58.6764	-62.4759	-56.4873		-65.1493	-73.0334	-61.988	-54.6878	-59.0467	-56.4113		-67.2608	-74.7256	-63.6414	-54.9603	-60.5796	-54.443
2024-06-17	-67.8743	-74.5201	-62.9377	-55.0854	-60.1117	-54.1398		-66.5899	-74.6037	-63.7648	-55.7633	-60.1294	-57.1708		-68.5202	-75.2737	-64.6924	-57.3492	-61.8249	-56.1349
2024-06-29	-75.7203	-83.7603	-72.5956	-63.9272	-69.0565	-63.4266		-67.7399	-75.7318	-65.256	-56.6332	-61.0522	-57.658		-71.3686	-78.3769	-68.1479	-60.9609	-66.7259	-60.7935
2024-07-11	-69.2973	-77.0053	-65.6255	-57.1803	-63.0159	-58.3195		-68.7636	-76.6456	-66.4303	-57.1789	-61.7276	-58.0033		-72.3386	-81.7827	-67.2982	-58.0644	-64.2428	-60.1712
2024-07-23	-69.7538	-78.2953	-68.9728	-59.9725	-65.1557	-59.2643		-69.6079	-77.3509	-67.3522	-57.5434	-62.23	-58.2754		-68.2535	-76.6344	-68.1259	-59.8267	-66.2715	-61.1137
2024-08-04	-64.4819	-75.2311	-64.2137	-55.3927	-62.5924	-62.7049		-70.3356	-77.9017	-68.0561	-57.7987	-62.6428	-58.4665		-67.2877	-78.6644	-68.2827	-58.335	-62.7567	-62.221
2024-08-16								-70.9615	-78.3248	-68.6068	-57.9875	-62.9746	-58.6134		-69.0471	-82.6903	-67.2292	-59.1817	-63.2469	-64.4169
2024-08-28								-71.4691	-78.6678	-69.0404	-58.1128	-63.2299	-58.7172		-72.275	-85.6937	-71.5441	-62.7219	-65.829	-64.1309
2024-09-09								-71.8648	-78.9077	-69.3611	-58.1974	-63.4279	-58.7971		-73.6149	-85.1424	-72.3543	-63.7332	-64.2959	-67.0808
2024-09-21								-72.2082	-79.1031	-69.6021	-58.2546	-63.5714	-58.8468		-72.6588	-84.995	-76.0604	-62.2301	-66.3513	-68.3245
2024-10-03								-72.5054	-79.2627	-69.7896	-58.2998	-63.7042	-58.8942		-71.7789	-88.0096	-79.4264	-64.2028	-68.3802	-68.6786
