# Supplementary material for: Mine subsidence monitoring and prediction integrating SBAS-InSAR technology and BO-Prophet model
Source: PeerJ journal article supplement (doi:10.7717/peerj-cs.3327), 2025-10-28
Supplement: Figure121.xlsx [file Figure121.xlsx]

## Sheet: Sheet1
y	x	SBAS-InSAR	Prediction
37.9743	113.5	-24.7996	-22.0544
37.9743	113.5	-23.0118	-19.6008
37.9743	113.5	-27.7074	-22.1123
37.9743	113.5	-28.3515	-24.5793
37.9743	113.501	-29.0042	-25.7346
37.9741	113.5	-31.4003	-29.7575
37.9741	113.5	-35.1339	-33.2329
37.9741	113.5	-31.4066	-29.0971
37.9741	113.5	-27.7758	-24.9612
37.9741	113.5	-27.3286	-21.9658
37.9741	113.5	-27.5821	-24.2465
37.9741	113.5	-29.2802	-26.0171
37.9741	113.501	-29.0604	-26.2542
37.9741	113.501	-27.4985	-25.5465
37.9741	113.501	-26.8824	-25.5446
37.9741	113.501	-26.4185	-25.2338
37.9741	113.501	-25.3885	-24.0252
37.974	113.5	-28.9204	-27.603
37.974	113.5	-32.2628	-30.6362
37.974	113.5	-35.5312	-33.6694
37.974	113.5	-32.9855	-30.8297
37.974	113.5	-30.5173	-27.99
37.974	113.5	-28.5478	-25.6161
37.974	113.5	-29.5605	-26.5474
37.974	113.5	-29.96	-26.8537
37.974	113.501	-28.639	-26.1021
37.974	113.501	-26.4905	-24.7582
37.974	113.501	-25.2077	-23.9128
37.974	113.501	-24.7978	-23.5098
37.974	113.501	-24.4502	-23.0835
37.974	113.501	-23.1523	-21.6935
37.974	113.501	-20.4269	-18.8106
37.974	113.501	-18.0445	-16.0776
37.974	113.502	-15.2847	-13.294
37.9739	113.499	-25.7869	-24.4788
37.9739	113.5	-28.1421	-26.7107
37.9739	113.5	-30.629	-28.9427
37.9739	113.5	-33.1396	-31.1747
37.9739	113.5	-32.5738	-30.583
37.9739	113.5	-32.1442	-29.9914
37.9739	113.5	-31.3015	-28.8251
37.9739	113.5	-30.4748	-27.6758
37.9739	113.5	-28.9048	-26.1275
37.9739	113.501	-26.9254	-24.8126
37.9739	113.501	-24.7558	-23.2978
37.9739	113.501	-23.6249	-21.6242
37.9739	113.501	-22.5304	-20.7035
37.9739	113.501	-22.7472	-20.9688
37.9739	113.501	-22.3416	-21.1121
37.9739	113.501	-20.208	-18.904
37.9739	113.501	-17.972	-16.2843
37.9739	113.502	-15.4225	-13.5879
37.9739	113.502	-14.1754	-12.8352
37.9739	113.502	-12.9311	-12.0826
37.9739	113.502	-12.6356	-12.4247
37.9738	113.499	-19.8548	-18.5961
37.9738	113.499	-24.2368	-21.6519
37.9738	113.5	-24.3526	-22.6273
37.9738	113.5	-25.4564	-23.6028
37.9738	113.5	-26.8131	-24.7726
37.9738	113.5	-28.6241	-26.6677
37.9738	113.5	-30.1245	-28.1474
37.9738	113.5	-30.8153	-28.567
37.9738	113.5	-28.5069	-26.0649
37.9738	113.5	-26.556	-24.3477
37.9738	113.501	-24.889	-23.3741
37.9738	113.501	-23.5779	-22.2532
37.9738	113.501	-22.4729	-20.2471
37.9738	113.501	-21.3199	-18.9501
37.9738	113.501	-21.4447	-19.6089
37.9738	113.501	-21.4398	-20.3759
37.9738	113.501	-19.4922	-18.4146
37.9738	113.501	-17.3261	-15.896
37.9738	113.502	-15.2235	-13.5325
37.9738	113.502	-14.3546	-13.3155
37.9738	113.502	-13.3354	-12.8003
37.9738	113.502	-12.6854	-12.6876
37.9738	113.502	-11.9758	-11.5591
37.9738	113.502	-8.32493	-6.77426
37.9736	113.499	-11.8033	-9.98024
37.9736	113.499	-14.8038	-13.1853
37.9736	113.499	-18.3704	-16.3904
37.9736	113.5	-20.0748	-16.8694
37.9736	113.5	-18.9828	-16.8762
37.9736	113.5	-20.3551	-17.8658
37.9736	113.5	-23.5694	-21.4625
37.9736	113.5	-26.4032	-24.4124
37.9736	113.5	-27.5784	-25.4022
37.9736	113.5	-25.2585	-23.065
37.9736	113.5	-24.6032	-22.2996
37.9736	113.501	-23.9161	-22.5786
37.9736	113.501	-24.0827	-22.7078
37.9736	113.501	-23.5267	-21.7784
37.9736	113.501	-23.1952	-20.8138
37.9736	113.501	-22.3767	-20.6717
37.9736	113.501	-21.7163	-20.7353
37.9736	113.501	-19.8334	-18.9291
37.9736	113.501	-17.3465	-16.273
37.9736	113.502	-14.874	-13.617
37.9736	113.502	-14.3791	-13.6883
37.9736	113.502	-13.366	-12.8873
37.9736	113.502	-12.311	-12.0862
37.9736	113.502	-11.3759	-10.7417
37.9736	113.502	-10.5327	-9.71916
37.9736	113.502	-8.14773	-6.23384
37.9736	113.503	-9.17494	-7.15999
37.9736	113.503	-11.2468	-9.50862
37.9735	113.499	-7.1846	-5.45698
37.9735	113.499	-10.6749	-8.44349
37.9735	113.499	-14.1542	-11.43
37.9735	113.5	-14.7281	-12.0041
37.9735	113.5	-13.9133	-11.1812
37.9735	113.5	-14.8194	-11.9306
37.9735	113.5	-18.9593	-15.7125
37.9735	113.5	-22.1546	-18.8853
37.9735	113.5	-23.1032	-20.0814
37.9735	113.5	-21.9173	-19.6979
37.9735	113.5	-23.5244	-22.454
37.9735	113.501	-25.7107	-25.6143
37.9735	113.501	-27.6426	-27.3015
37.9735	113.501	-27.5116	-26.655
37.9735	113.501	-26.487	-25.1399
37.9735	113.501	-24.8028	-23.4025
37.9735	113.501	-22.772	-21.6651
37.9735	113.501	-20.8094	-19.7419
37.9735	113.502	-14.7502	-13.9235
37.9735	113.502	-14.6058	-14.0578
37.9735	113.502	-13.7982	-13.0821
37.9735	113.502	-12.4482	-11.6453
37.9735	113.502	-11.5011	-10.3443
37.9735	113.502	-12.2166	-10.8849
37.9735	113.502	-13.5573	-11.1996
37.9735	113.503	-13.6463	-11.0758
37.9735	113.503	-15.8074	-13.1441
37.9735	113.503	-15.004	-12.8837
37.9735	113.503	-14.2137	-12.6233
37.9735	113.503	-13.0337	-11.81
37.9734	113.499	-4.82866	-3.42277
37.9734	113.499	-5.38577	-4.03438
37.9734	113.499	-7.67347	-6.07078
37.9734	113.499	-9.97607	-8.10718
37.9734	113.5	-10.5991	-8.72649
37.9734	113.5	-9.25203	-7.47702
37.9734	113.5	-9.94718	-7.99662
37.9734	113.5	-13.5983	-11.1069
37.9734	113.5	-17.0739	-14.3838
37.9734	113.5	-17.9341	-15.6305
37.9734	113.5	-18.8374	-17.6128
37.9734	113.5	-23.1443	-23.1685
37.9734	113.501	-28.1648	-28.9853
37.9734	113.501	-31.1903	-31.7243
37.9734	113.501	-31.2078	-31.1512
37.9734	113.501	-29.8443	-29.2088
37.9734	113.501	-27.3044	-26.4103
37.9734	113.501	-24.6434	-23.6119
37.9734	113.501	-23.832	-22.8893
37.9734	113.502	-17.1314	-16.5829
37.9734	113.502	-15.343	-14.6038
37.9734	113.502	-15.0757	-14.0155
37.9734	113.502	-13.699	-12.4905
37.9734	113.502	-13.0954	-11.6258
37.9734	113.502	-14.1517	-12.5145
37.9734	113.502	-15.653	-13.8596
37.9734	113.502	-18.3847	-16.1051
37.9734	113.503	-19.8751	-17.295
37.9734	113.503	-21.6983	-19.4444
37.9734	113.503	-20.6567	-18.6965
37.9734	113.503	-18.7462	-16.9035
37.9734	113.503	-16.4678	-15.0334
37.9734	113.503	-15.6082	-14.211
37.9734	113.503	-14.9666	-13.6562
37.9734	113.503	-12.7968	-11.9552
37.9734	113.504	-9.5833	-8.97169
37.9733	113.499	-5.39388	-4.08661
37.9733	113.499	-5.80123	-4.67577
37.9733	113.499	-6.64529	-5.39837
37.9733	113.499	-7.47177	-6.12097
37.9733	113.5	-7.96436	-6.67043
37.9733	113.5	-7.28861	-6.23753
37.9733	113.5	-8.26647	-7.15255
37.9733	113.5	-11.2918	-9.5886
37.9733	113.5	-14.5588	-12.4954
37.9733	113.5	-15.9903	-14.2653
37.9733	113.5	-18.5775	-18.0071
37.9733	113.5	-24.9294	-25.6651
37.9733	113.501	-31.6375	-33.1121
37.9733	113.501	-34.178	-35.3533
37.9733	113.501	-32.8946	-33.4673
37.9733	113.501	-30.5859	-30.5016
37.9733	113.501	-28.3554	-28.0723
37.9733	113.501	-26.2208	-25.643
37.9733	113.501	-25.5913	-25.0023
37.9733	113.501	-23.9763	-23.5152
37.9733	113.502	-17.3	-16.2495
37.9733	113.502	-17.9566	-16.7751
37.9733	113.502	-19.0696	-18.0493
37.9733	113.502	-18.6207	-17.0838
37.9733	113.502	-19.5093	-17.757
37.9733	113.502	-22.4212	-20.5034
37.9733	113.503	-25.4983	-23.3551
37.9733	113.503	-26.9877	-25.0927
37.9733	113.503	-26.8816	-25.1244
37.9733	113.503	-23.7149	-22.0208
37.9733	113.503	-20.4037	-18.8679
37.9733	113.503	-17.4999	-16.045
37.9733	113.503	-15.8975	-14.5961
37.9733	113.503	-13.896	-12.8717
37.9733	113.504	-10.8519	-9.66304
37.9733	113.504	-8.15707	-6.81484
37.9733	113.504	-5.76757	-4.20146
37.9733	113.504	-5.3098	-4.13518
37.9733	113.504	-5.23975	-4.43059
37.9731	113.499	-5.61332	-4.4628
37.9731	113.499	-6.33802	-5.00157
37.9731	113.499	-7.07456	-5.54033
37.9731	113.499	-6.73572	-5.17607
37.9731	113.499	-6.38442	-4.81182
37.9731	113.5	-6.23404	-4.83926
37.9731	113.5	-6.611	-5.72634
37.9731	113.5	-8.42289	-7.71467
37.9731	113.5	-11.474	-10.4125
37.9731	113.5	-14.5971	-13.1212
37.9731	113.5	-16.529	-15.2349
37.9731	113.5	-20.2079	-19.859
37.9731	113.5	-26.8621	-27.5887
37.9731	113.501	-33.4534	-34.8122
37.9731	113.501	-34.7272	-36.0384
37.9731	113.501	-32.5972	-33.6529
37.9731	113.501	-30.1419	-30.8924
37.9731	113.501	-28.7702	-29.1978
37.9731	113.501	-27.6027	-27.6391
37.9731	113.501	-27.0118	-26.7703
37.9731	113.501	-27.696	-27.4222
37.9731	113.502	-22.6733	-21.7028
37.9731	113.502	-22.1796	-21.2389
37.9731	113.502	-25.5323	-24.9398
37.9731	113.502	-24.039	-23.1517
37.9731	113.502	-23.4677	-22.2215
37.9731	113.502	-22.4939	-20.9764
37.9731	113.502	-24.8575	-23.4821
37.9731	113.503	-27.5285	-26.2656
37.9731	113.503	-29.2872	-27.9398
37.9731	113.503	-30.3831	-29.0453
37.9731	113.503	-27.4195	-25.9446
37.9731	113.503	-24.1073	-22.5458
37.9731	113.503	-20.4733	-18.9286
37.9731	113.503	-18.0843	-16.6365
37.9731	113.503	-15.9919	-14.5867
37.9731	113.504	-12.6736	-11.0363
37.9731	113.504	-10.0826	-8.20056
37.9731	113.504	-7.35084	-5.43449
37.9731	113.504	-6.46212	-5.29861
37.9731	113.504	-6.35025	-5.9436
37.9731	113.504	-6.98961	-7.1474
37.9731	113.504	-10.0126	-10.2622
37.9731	113.504	-13.0354	-13.3769
37.9731	113.505	-14.439	-14.8249
37.973	113.499	-4.38059	-2.56517
37.973	113.499	-5.42991	-3.25825
37.973	113.499	-6.47166	-3.95133
37.973	113.499	-5.96759	-3.70359
37.973	113.499	-5.01891	-2.84313
37.973	113.5	-5.1444	-3.324
37.973	113.5	-7.11419	-5.80872
37.973	113.5	-10.3561	-9.45665
37.973	113.5	-13.8724	-12.9265
37.973	113.5	-17.0618	-15.962
37.973	113.5	-19.5489	-18.5435
37.973	113.5	-23.5355	-23.2442
37.973	113.5	-29.8751	-30.5182
37.973	113.501	-35.7684	-37.083
37.973	113.501	-36.3691	-37.9777
37.973	113.501	-33.9538	-35.59
37.973	113.501	-31.5367	-33.2023
37.973	113.501	-30.403	-31.6839
37.973	113.501	-29.3297	-29.8647
37.973	113.501	-28.2233	-28.0455
37.973	113.501	-28.9586	-28.6567
37.973	113.502	-27.1714	-26.648
37.973	113.502	-26.7336	-26.2593
37.973	113.502	-29.0849	-28.8427
37.973	113.502	-28.1584	-27.7347
37.973	113.502	-25.649	-24.6273
37.973	113.502	-26.5496	-25.6503
37.973	113.503	-28.2137	-27.431
37.973	113.503	-29.7575	-28.6375
37.973	113.503	-30.9866	-29.8439
37.973	113.503	-29.0305	-27.6212
37.973	113.503	-26.4525	-24.7205
37.973	113.503	-22.9738	-21.3889
37.973	113.503	-20.232	-18.7065
37.973	113.503	-18.0969	-16.5347
37.973	113.504	-15.2133	-13.4628
37.973	113.504	-12.8464	-11.0225
37.973	113.504	-10.4057	-8.56077
37.973	113.504	-9.40304	-8.27374
37.973	113.504	-9.48862	-9.09591
37.973	113.504	-9.95839	-10.2189
37.973	113.504	-12.3417	-12.722
37.973	113.504	-14.7286	-15.2252
37.973	113.505	-16.8663	-17.449
37.973	113.505	-13.947	-14.4577
37.973	113.505	-10.2426	-10.6492
37.973	113.505	-6.60055	-6.84075
37.973	113.505	-7.51981	-7.74535
37.9729	113.499	-1.87403	1.60829
37.9729	113.499	-3.48928	-0.162865
37.9729	113.499	-5.07154	-1.93402
37.9729	113.499	-5.27001	-2.81991
37.9729	113.499	-4.39674	-2.10816
37.9729	113.5	-4.84423	-2.86342
37.9729	113.5	-7.65679	-5.87772
37.9729	113.5	-11.8254	-10.3868
37.9729	113.5	-15.9558	-14.7882
37.9729	113.5	-19.4111	-18.5036
37.9729	113.5	-22.4984	-21.8565
37.9729	113.5	-26.7767	-26.7874
37.9729	113.5	-32.7665	-33.659
37.9729	113.501	-37.9728	-39.5339
37.9729	113.501	-38.3243	-40.3114
37.9729	113.501	-35.8671	-37.9155
37.9729	113.501	-33.4003	-35.5195
37.9729	113.501	-32.2584	-33.996
37.9729	113.501	-30.1132	-30.0686
37.9729	113.501	-30.7415	-30.4765
37.9729	113.502	-32.4749	-32.4193
37.9729	113.502	-32.0695	-32.0921
37.9729	113.502	-30.6148	-30.4791
37.9729	113.502	-30.6623	-30.471
37.9729	113.502	-30.0658	-29.7126
37.9729	113.502	-27.6672	-27.1073
37.9729	113.503	-28.3224	-27.8511
37.9729	113.503	-29.7777	-28.8238
37.9729	113.503	-30.2553	-29.1504
37.9729	113.503	-29.3943	-27.9243
37.9729	113.503	-28.4118	-26.542
37.9729	113.503	-27.0577	-25.532
37.9729	113.503	-25.4022	-24.0846
37.9729	113.503	-22.5897	-21.242
37.9729	113.504	-18.7155	-17.2848
37.9729	113.504	-15.4995	-13.9865
37.9729	113.504	-13.5429	-12.0165
37.9729	113.504	-12.9809	-12.11
37.9729	113.504	-13.4062	-13.1884
37.9729	113.504	-13.8625	-14.2668
37.9729	113.504	-15.1672	-15.7318
37.9729	113.504	-16.5336	-17.1969
37.9729	113.505	-17.8579	-18.6619
37.9729	113.505	-15.5282	-16.2509
37.9729	113.505	-8.70828	-9.06005
37.9729	113.505	-8.81681	-9.0835
37.9729	113.505	-7.41168	-7.20631
37.9729	113.505	-5.99411	-5.32913
37.9729	113.505	-4.54894	-3.44256
37.9729	113.506	-4.64871	-3.42703
37.9728	113.499	-0.326712	3.6815
37.9728	113.499	-0.235853	4.69985
37.9728	113.499	-2.26439	1.70499
37.9728	113.499	-4.26757	-1.28988
37.9728	113.499	-5.32882	-3.54622
37.9728	113.499	-4.6478	-3.03749
37.9728	113.5	-5.5338	-3.99589
37.9728	113.5	-8.50425	-6.65342
37.9728	113.5	-13.133	-11.2803
37.9728	113.5	-17.3634	-15.8443
37.9728	113.5	-21.2155	-20.4879
37.9728	113.5	-24.8489	-24.7868
37.9728	113.5	-29.2484	-29.9449
37.9728	113.5	-34.1621	-35.6003
37.9728	113.501	-37.8686	-39.8082
37.9728	113.501	-37.3875	-39.6265
37.9728	113.501	-35.2212	-37.4629
37.9728	113.501	-33.1517	-35.2993
37.9728	113.501	-32.8172	-34.7311
37.9728	113.501	-31.8937	-33.03
37.9728	113.501	-32.5264	-32.8573
37.9728	113.501	-33.5065	-33.5378
37.9728	113.502	-36.1281	-36.4125
37.9728	113.502	-37.0487	-37.2953
37.9728	113.502	-32.2243	-32.0179
37.9728	113.502	-30.528	-30.243
37.9728	113.502	-30.2339	-29.8968
37.9728	113.502	-29.3145	-28.9381
37.9728	113.503	-29.9133	-29.5735
37.9728	113.503	-31.3269	-30.6482
37.9728	113.503	-31.1688	-30.087
37.9728	113.503	-30.5467	-29.044
37.9728	113.503	-30.927	-28.9043
37.9728	113.503	-31.8033	-30.3841
37.9728	113.503	-31.092	-30.1468
37.9728	113.503	-27.2069	-26.3297
37.9728	113.504	-21.8862	-20.8484
37.9728	113.504	-18.1824	-16.9457
37.9728	113.504	-16.6789	-15.3472
37.9728	113.504	-16.5782	-15.7116
37.9728	113.504	-16.9918	-16.7978
37.9728	113.504	-17.5765	-18.0888
37.9728	113.504	-17.929	-18.5925
37.9728	113.504	-18.2633	-18.9946
37.9728	113.505	-18.6058	-19.3968
37.9728	113.505	-16.9339	-17.6855
37.9728	113.505	-13.8368	-14.4719
37.9728	113.505	-10.7661	-11.2582
37.9728	113.505	-10.1107	-10.3447
37.9728	113.505	-8.82357	-8.68609
37.9728	113.505	-7.58795	-7.0275
37.9728	113.505	-6.65996	-5.99148
37.9728	113.506	-6.60595	-5.90333
37.9728	113.506	-6.5561	-5.81519
37.9728	113.506	-6.90793	-6.11624
37.9728	113.506	-8.3276	-7.78619
37.9726	113.499	-0.363289	4.15562
37.9726	113.499	-1.36139	3.50885
37.9726	113.499	-3.0614	0.3844
37.9726	113.499	-4.76064	-2.74005
37.9726	113.499	-5.92214	-5.18762
37.9726	113.499	-5.70181	-4.95801
37.9726	113.5	-6.66764	-5.63093
37.9726	113.5	-9.70432	-7.85777
37.9726	113.5	-14.1794	-12.0542
37.9726	113.5	-18.5255	-16.7644
37.9726	113.5	-22.4788	-21.9612
37.9726	113.5	-26.6609	-27.3302
37.9726	113.5	-30.9332	-32.5671
37.9726	113.5	-33.9778	-36.1388
37.9726	113.501	-35.4415	-37.7342
37.9726	113.501	-34.1787	-36.484
37.9726	113.501	-32.9737	-35.0843
37.9726	113.501	-31.7308	-33.679
37.9726	113.501	-31.8353	-33.599
37.9726	113.501	-31.3682	-32.933
37.9726	113.501	-36.2666	-36.8455
37.9726	113.502	-39.3141	-39.7945
37.9726	113.502	-40.9946	-41.3387
37.9726	113.502	-39.1365	-39.232
37.9726	113.502	-34.1295	-33.8628
37.9726	113.502	-30.0874	-29.7181
37.9726	113.502	-29.6747	-29.2243
37.9726	113.502	-29.1535	-28.7053
37.9726	113.503	-32.457	-32.0525
37.9726	113.503	-33.5063	-32.9751
37.9726	113.503	-33.3634	-32.1562
37.9726	113.503	-32.9715	-31.1236
37.9726	113.503	-33.8207	-31.7665
37.9726	113.503	-35.756	-34.4795
37.9726	113.503	-36.3282	-35.8837
37.9726	113.503	-32.2476	-31.8666
37.9726	113.504	-26.1573	-25.5086
37.9726	113.504	-21.2528	-20.1518
37.9726	113.504	-19.5262	-18.0506
37.9726	113.504	-19.3376	-18.1496
37.9726	113.504	-19.5163	-19.0964
37.9726	113.504	-20.0264	-20.4775
37.9726	113.504	-19.7695	-20.3888
37.9726	113.504	-19.5293	-19.9739
37.9726	113.505	-19.2877	-19.5589
37.9726	113.505	-17.1622	-17.4556
37.9726	113.505	-14.87	-15.1607
37.9726	113.505	-12.5804	-12.8657
37.9726	113.505	-11.6636	-11.6686
37.9726	113.505	-10.4349	-10.1157
37.9726	113.505	-9.22084	-8.56288
37.9726	113.505	-8.87331	-8.43609
37.9726	113.506	-8.90434	-8.63349
37.9726	113.506	-8.91957	-8.8309
37.9726	113.506	-9.14846	-9.24736
37.9726	113.506	-10.1192	-10.661
37.9726	113.506	-11.0421	-11.6143
37.9726	113.506	-14.0531	-13.6373
37.9725	113.499	-1.50776	1.95647
37.9725	113.499	-2.93236	0.884359
37.9725	113.499	-3.90903	-1.3669
37.9725	113.499	-4.91301	-3.61816
37.9725	113.499	-6.12272	-5.9051
37.9725	113.499	-6.50514	-5.97647
37.9725	113.5	-8.1498	-6.99093
37.9725	113.5	-11.2254	-9.18233
37.9725	113.5	-15.6437	-13.5583
37.9725	113.5	-19.7241	-18.3338
37.9725	113.5	-23.829	-23.9573
37.9725	113.5	-27.9343	-29.4212
37.9725	113.5	-31.4985	-33.9676
37.9725	113.5	-32.6932	-35.3815
37.9725	113.501	-32.2733	-34.7347
37.9725	113.501	-30.738	-32.9186
37.9725	113.501	-30.68	-32.6945
37.9725	113.501	-30.529	-32.479
37.9725	113.501	-31.1767	-33.1005
37.9725	113.501	-30.9011	-33.0755
37.9725	113.501	-33.4057	-35.0899
37.9725	113.501	-37.9471	-38.9091
37.9725	113.502	-41.7424	-42.1516
37.9725	113.502	-42.9716	-43.3004
37.9725	113.502	-42.3575	-42.5568
37.9725	113.502	-32.0804	-31.6535
37.9725	113.502	-29.9742	-29.5036
37.9725	113.502	-31.0959	-30.6832
37.9725	113.503	-34.8514	-34.384
37.9725	113.503	-34.6853	-34.1665
37.9725	113.503	-34.7944	-33.7279
37.9725	113.503	-34.9176	-33.2892
37.9725	113.503	-35.98	-34.0044
37.9725	113.503	-37.2407	-36.0952
37.9725	113.503	-37.2828	-36.8576
37.9725	113.503	-33.8288	-33.702
37.9725	113.504	-28.9567	-28.5
37.9725	113.504	-25.0374	-23.986
37.9725	113.504	-23.1378	-21.4454
37.9725	113.504	-22.1424	-20.4363
37.9725	113.504	-21.2204	-20.2325
37.9725	113.504	-20.863	-20.8195
37.9725	113.504	-20.4221	-20.5318
37.9725	113.504	-20.2533	-20.0792
37.9725	113.505	-20.1051	-19.6265
37.9725	113.505	-18.3989	-17.9655
37.9725	113.505	-16.6898	-16.3044
37.9725	113.505	-14.9808	-14.6434
37.9725	113.505	-13.7679	-13.328
37.9725	113.505	-12.3642	-11.7994
37.9725	113.505	-11.0423	-10.4216
37.9725	113.505	-11.1086	-10.8682
37.9725	113.506	-11.3606	-11.4538
37.9725	113.506	-11.8477	-12.3045
37.9725	113.506	-12.3483	-13.2333
37.9725	113.506	-13.2542	-14.811
37.9725	113.506	-13.2389	-14.5698
37.9725	113.506	-14.2529	-13.8565
37.9725	113.506	-14.9285	-12.5686
37.9725	113.506	-17.1786	-14.1506
37.9724	113.499	0.0687859	2.3812
37.9724	113.499	-1.61932	0.975846
37.9724	113.499	-3.30724	-0.429506
37.9724	113.499	-4.06204	-2.22317
37.9724	113.499	-4.8359	-4.01683
37.9724	113.499	-6.30573	-6.15205
37.9724	113.499	-7.67367	-6.83517
37.9724	113.5	-10.132	-8.55025
37.9724	113.5	-13.3353	-11.2253
37.9724	113.5	-17.1414	-15.5058
37.9724	113.5	-21.3097	-20.7144
37.9724	113.5	-25.2975	-26.2432
37.9724	113.5	-29.1989	-31.4466
37.9724	113.5	-31.7104	-34.6901
37.9724	113.5	-31.8118	-34.7392
37.9724	113.501	-30.6439	-33.1664
37.9724	113.501	-29.4054	-31.5937
37.9724	113.501	-29.7176	-31.8143
37.9724	113.501	-31.5215	-33.8474
37.9724	113.501	-31.4864	-33.96
37.9724	113.501	-32.683	-34.8412
37.9724	113.502	-43.2017	-43.5357
37.9724	113.502	-44.2532	-44.5357
37.9724	113.502	-45.1218	-45.3765
37.9724	113.502	-40.7821	-40.6805
37.9724	113.502	-35.4864	-35.115
37.9724	113.502	-31.586	-31.1854
37.9724	113.502	-33.2447	-32.9867
37.9724	113.502	-34.1564	-33.7809
37.9724	113.503	-34.9946	-34.5228
37.9724	113.503	-34.773	-34.1109
37.9724	113.503	-35.2274	-34.208
37.9724	113.503	-35.4452	-34.0694
37.9724	113.503	-35.967	-34.3232
37.9724	113.503	-35.56	-34.7759
37.9724	113.503	-36.1195	-35.8067
37.9724	113.503	-34.8873	-34.8705
37.9724	113.504	-32.9765	-32.7077
37.9724	113.504	-30.0373	-29.1795
37.9724	113.504	-27.6134	-26.1564
37.9724	113.504	-25.4575	-23.5332
37.9724	113.504	-23.0614	-21.4953
37.9724	113.504	-21.3937	-20.5269
37.9724	113.504	-20.8694	-20.3236
37.9724	113.504	-21.1658	-20.6046
37.9724	113.505	-21.4606	-20.8857
37.9724	113.505	-20.2011	-19.5761
37.9724	113.505	-18.9425	-18.2665
37.9724	113.505	-17.712	-16.957
37.9724	113.505	-15.9602	-15.3786
37.9724	113.505	-14.2187	-13.8002
37.9724	113.505	-12.6766	-12.4717
37.9724	113.505	-13.1326	-13.1898
37.9724	113.506	-13.5279	-13.9078
37.9724	113.506	-14.8183	-15.6241
37.9724	113.506	-16.0016	-17.3125
37.9724	113.506	-17.1911	-19.001
37.9724	113.506	-15.578	-16.1532
37.9724	113.506	-14.5918	-12.8583
37.9724	113.506	-13.6173	-9.56336
37.9724	113.506	-15.4393	-10.927
37.9722	113.499	0.573702	2.03004
37.9722	113.499	-0.745979	1.13618
37.9722	113.499	-2.05272	0.242329
37.9722	113.499	-3.15003	-1.78227
37.9722	113.499	-4.2722	-3.80687
37.9722	113.499	-6.71438	-6.62337
37.9722	113.499	-9.32514	-8.20718
37.9722	113.5	-12.7973	-11.0035
37.9722	113.5	-15.8841	-14.2204
37.9722	113.5	-19.4557	-18.9371
37.9722	113.5	-23.6578	-24.3412
37.9722	113.5	-27.7535	-29.561
37.9722	113.5	-30.9022	-33.5174
37.9722	113.5	-32.6246	-35.574
37.9722	113.5	-32.1998	-34.9871
37.9722	113.501	-31.4113	-33.8301
37.9722	113.501	-30.5742	-32.6731
37.9722	113.501	-32.2854	-34.1247
37.9722	113.501	-33.9545	-36.3871
37.9722	113.501	-33.093	-35.7707
37.9722	113.501	-33.093	-35.7707
37.9722	113.502	-43.8895	-43.9192
37.9722	113.502	-44.0828	-44.0654
37.9722	113.502	-42.0619	-41.8974
37.9722	113.502	-34.1948	-33.7393
37.9722	113.502	-35.449	-35.0155
37.9722	113.502	-35.4379	-34.9674
37.9722	113.503	-35.2505	-34.6633
37.9722	113.503	-34.6289	-33.9088
37.9722	113.503	-35.071	-34.094
37.9722	113.503	-34.6356	-33.5374
37.9722	113.503	-34.1858	-32.9808
37.9722	113.503	-33.4474	-32.6996
37.9722	113.503	-34.3914	-34.088
37.9722	113.503	-34.8917	-34.8416
37.9722	113.504	-34.8517	-34.726
37.9722	113.504	-33.3372	-32.8033
37.9722	113.504	-31.629	-30.5316
37.9722	113.504	-28.4626	-27.1011
37.9722	113.504	-24.7626	-23.1917
37.9722	113.504	-21.647	-20.2662
37.9722	113.504	-21.0954	-20.3459
37.9722	113.504	-22.1678	-21.8884
37.9722	113.505	-23.2686	-23.4309
37.9722	113.505	-22.187	-22.1182
37.9722	113.505	-21.0985	-20.8054
37.9722	113.505	-20.0672	-19.4927
37.9722	113.505	-17.9093	-17.5772
37.9722	113.505	-15.7234	-15.6616
37.9722	113.505	-13.8945	-14.155
37.9722	113.505	-14.431	-14.8312
37.9722	113.506	-14.9445	-15.5073
37.9722	113.506	-17.5447	-18.5648
37.9722	113.506	-19.9916	-21.5019
37.9722	113.506	-22.493	-24.439
37.9722	113.506	-19.8508	-20.661
37.9722	113.506	-16.9628	-14.8803
37.9722	113.506	-14.1196	-9.09953
37.9722	113.506	-15.4299	-9.75924
37.9722	113.507	-15.8352	-10.1125
37.9722	113.507	-21.3821	-18.0393
37.9722	113.507	-21.0557	-17.9189
37.9721	113.499	0.781289	1.4387
37.9721	113.499	-0.0128483	1.20761
37.9721	113.499	-0.80629	0.97651
37.9721	113.499	-2.18352	-1.16578
37.9721	113.499	-3.58215	-3.30807
37.9721	113.499	-6.83579	-6.78202
37.9721	113.499	-10.4866	-9.44533
37.9721	113.5	-15.1387	-13.7072
37.9721	113.5	-19.0126	-18.2359
37.9721	113.5	-22.5239	-22.9776
37.9721	113.5	-26.6435	-27.9953
37.9721	113.5	-30.1826	-32.2178
37.9721	113.5	-33.0122	-35.6988
37.9721	113.5	-34.4005	-37.3055
37.9721	113.5	-33.7509	-36.5412
37.9721	113.501	-33.4902	-35.7361
37.9721	113.501	-33.1842	-34.9309
37.9721	113.501	-35.5248	-36.9926
37.9721	113.501	-35.7548	-37.6041
37.9721	113.501	-36.1341	-38.1793
37.9721	113.501	-35.146	-37.5279
37.9721	113.501	-35.7794	-37.5563
37.9721	113.502	-41.0145	-40.4281
37.9721	113.502	-41.0145	-40.4281
37.9721	113.502	-41.0145	-40.4281
37.9721	113.502	-36.9959	-36.071
37.9721	113.502	-36.9959	-36.071
37.9721	113.502	-36.7031	-35.8069
37.9721	113.503	-34.6534	-33.6067
37.9721	113.503	-34.7705	-33.6007
37.9721	113.503	-33.8645	-32.7372
37.9721	113.503	-32.8917	-31.8738
37.9721	113.503	-32.4474	-31.707
37.9721	113.503	-33.9043	-33.4225
37.9721	113.503	-35.0063	-34.8494
37.9721	113.504	-35.3304	-35.2671
37.9721	113.504	-34.478	-34.3311
37.9721	113.504	-33.6374	-33.2522
37.9721	113.504	-30.8542	-30.1278
37.9721	113.504	-26.1654	-25.1735
37.9721	113.504	-21.8002	-20.6506
37.9721	113.504	-21.4379	-20.793
37.9721	113.504	-23.3205	-23.1968
37.9721	113.505	-25.4452	-25.8511
37.9721	113.505	-24.6384	-25.018
37.9721	113.505	-23.8227	-24.185
37.9721	113.505	-22.7269	-22.9249
37.9721	113.505	-21.3705	-21.7479
37.9721	113.505	-19.9893	-20.5709
37.9721	113.505	-17.6937	-18.4197
37.9721	113.505	-16.7486	-17.4477
37.9721	113.506	-15.7994	-16.4757
37.9721	113.506	-19.9893	-21.2809
37.9721	113.506	-24.1112	-25.9074
37.9721	113.506	-28.3078	-30.534
37.9721	113.506	-25.8505	-27.1456
37.9721	113.506	-16.1638	-10.8779
37.9721	113.506	-17.241	-12.0881
37.9721	113.507	-18.0573	-13.9814
37.9721	113.507	-21.3716	-18.1795
37.9721	113.507	-21.2605	-18.1672
37.9721	113.507	-21.1471	-18.1225
37.972	113.499	0.813317	0.893528
37.972	113.499	0.261008	0.822209
37.972	113.499	-0.298597	0.75089
37.972	113.499	-1.64109	-1.02849
37.972	113.499	-2.95747	-2.80786
37.972	113.499	-6.44166	-6.40358
37.972	113.499	-10.6823	-10.0363
37.972	113.5	-16.5906	-15.9018
37.972	113.5	-22.1224	-22.1838
37.972	113.5	-26.8248	-27.8293
37.972	113.5	-30.7432	-32.1801
37.972	113.5	-33.2292	-35.0133
37.972	113.5	-35.2446	-37.5969
37.972	113.5	-36.4599	-39.2423
37.972	113.5	-36.5376	-39.3993
37.972	113.501	-37.8403	-39.3733
37.972	113.501	-39.399	-40.5958
37.972	113.501	-38.701	-40.2446
37.972	113.501	-38.0365	-39.5225
37.972	113.501	-36.772	-38.285
37.972	113.501	-37.4455	-38.1394
37.972	113.501	-37.6426	-38.0957
37.972	113.502	-37.668	-36.8336
37.972	113.502	-37.6987	-36.9382
37.972	113.502	-37.792	-37.316
37.972	113.502	-37.6672	-36.5446
37.972	113.502	-37.6095	-36.221
37.972	113.502	-37.2756	-36.0742
37.972	113.503	-35.0726	-33.6343
37.972	113.503	-34.9713	-33.3219
37.972	113.503	-34.4743	-32.9811
37.972	113.503	-33.8765	-32.6402
37.972	113.503	-33.5031	-32.5966
37.972	113.503	-33.7494	-33.1911
37.972	113.503	-33.908	-33.627
37.972	113.504	-33.5821	-33.6016
37.972	113.504	-33.4165	-33.6815
37.972	113.504	-33.9923	-34.3227
37.972	113.504	-32.5143	-32.5853
37.972	113.504	-28.2445	-27.9027
37.972	113.504	-23.5982	-22.8173
37.972	113.504	-23.1708	-22.2193
37.972	113.504	-25.025	-24.164
37.972	113.505	-27.2381	-26.799
37.972	113.505	-27.158	-27.2832
37.972	113.505	-27.0982	-27.7673
37.972	113.505	-26.159	-27.0316
37.972	113.505	-25.1167	-26.0554
37.972	113.505	-24.0685	-25.0792
37.972	113.505	-21.182	-22.0555
37.972	113.505	-18.9393	-19.5581
37.972	113.506	-16.7777	-17.0606
37.972	113.506	-21.9163	-23.1051
37.972	113.506	-26.9532	-28.6997
37.972	113.506	-32.0784	-34.2943
37.972	113.506	-31.696	-33.4514
37.972	113.506	-20.5132	-17.1507
37.972	113.506	-18.7621	-15.1904
37.972	113.507	-19.6667	-17.6337
37.972	113.507	-19.9348	-18.3666
37.972	113.507	-22.0965	-18.6609
37.972	113.507	-21.9709	-18.6491
37.972	113.507	-21.6739	-18.6538
37.9719	113.499	0.965734	0.634687
37.9719	113.499	0.217803	0.0689045
37.9719	113.499	-0.524573	-0.496879
37.9719	113.499	-1.6112	-1.60897
37.9719	113.499	-3.34062	-3.28946
37.9719	113.499	-6.70537	-6.54439
37.9719	113.499	-11.6492	-11.1524
37.9719	113.5	-17.8909	-17.582
37.9719	113.5	-24.6153	-24.7485
37.9719	113.5	-29.7143	-30.5316
37.9719	113.5	-33.589	-34.6789
37.9719	113.5	-35.4848	-36.9623
37.9719	113.5	-37.1592	-39.1523
37.9719	113.5	-38.054	-40.5883
37.9719	113.5	-38.8087	-41.7631
37.9719	113.501	-40.6067	-42.8092
37.9719	113.501	-42.3089	-43.8552
37.9719	113.501	-43.1783	-44.3419
37.9719	113.501	-42.7927	-44.0865
37.9719	113.501	-39.2397	-39.7622
37.9719	113.501	-38.7421	-38.7137
37.9719	113.501	-39.8032	-39.8347
37.9719	113.502	-37.5299	-37.158
37.9719	113.502	-36.43	-35.9771
37.9719	113.502	-36.9186	-36.9177
37.9719	113.502	-37.4118	-36.9866
37.9719	113.502	-37.61	-36.7868
37.9719	113.502	-37.4462	-36.0991
37.9719	113.502	-36.875	-35.863
37.9719	113.503	-36.3351	-35.087
37.9719	113.503	-35.7691	-34.311
37.9719	113.503	-35.6857	-33.9117
37.9719	113.503	-35.5147	-33.9232
37.9719	113.503	-35.4009	-33.9347
37.9719	113.503	-34.9929	-33.9173
37.9719	113.503	-34.389	-33.8595
37.9719	113.503	-33.8466	-33.7011
37.9719	113.504	-32.8789	-33.162
37.9719	113.504	-33.0933	-33.7036
37.9719	113.504	-34.5691	-35.3976
37.9719	113.504	-34.4936	-35.0148
37.9719	113.504	-31.2984	-31.0939
37.9719	113.504	-27.2011	-26.1211
37.9719	113.504	-26.2676	-24.493
37.9719	113.504	-27.3532	-25.3512
37.9719	113.505	-28.8408	-27.1367
37.9719	113.505	-29.2792	-28.6515
37.9719	113.505	-29.8828	-30.1664
37.9719	113.505	-29.2862	-29.9713
37.9719	113.505	-28.9359	-29.6021
37.9719	113.505	-28.5885	-29.2328
37.9719	113.505	-25.3145	-25.6811
37.9719	113.505	-21.7627	-21.7158
37.9719	113.506	-18.3136	-17.7505
37.9719	113.506	-22.2269	-22.6344
37.9719	113.506	-27.6246	-28.7097
37.9719	113.506	-33.1357	-34.7851
37.9719	113.506	-32.1718	-33.118
37.9719	113.506	-29.3402	-29.1025
37.9719	113.506	-19.9218	-18.3066
37.9719	113.507	-20.5612	-19.9021
37.9719	113.507	-20.5624	-19.8018
37.9719	113.507	-22.0977	-18.8447
37.9719	113.507	-22.0626	-18.8846
37.9719	113.507	-21.4468	-18.8239
37.9719	113.507	-20.7759	-18.7632
37.9719	113.507	-20.3128	-18.7177
37.9717	113.499	1.8071	1.30067
37.9717	113.499	0.924747	0.358532
37.9717	113.499	0.0588385	-0.583601
37.9717	113.499	-0.814745	-1.52573
37.9717	113.499	-1.78147	-2.24052
37.9717	113.499	-3.39754	-3.52371
37.9717	113.499	-7.83946	-7.43353
37.9717	113.499	-13.712	-12.908
37.9717	113.5	-20.7153	-19.8793
37.9717	113.5	-26.3827	-25.7911
37.9717	113.5	-31.6697	-31.8539
37.9717	113.5	-35.416	-36.1411
37.9717	113.5	-37.7755	-38.9931
37.9717	113.5	-38.7897	-40.4032
37.9717	113.5	-39.3437	-41.5236
37.9717	113.5	-39.831	-42.5948
37.9717	113.501	-41.9901	-44.1643
37.9717	113.501	-44.032	-45.7094
37.9717	113.501	-45.927	-47.1231
37.9717	113.501	-46.279	-47.3583
37.9717	113.501	-44.1586	-44.7523
37.9717	113.501	-42.1364	-42.2647
37.9717	113.501	-40.4809	-40.3782
37.9717	113.501	-41.8479	-42.0164
37.9717	113.502	-41.1308	-41.1842
37.9717	113.502	-36.9383	-37.0384
37.9717	113.502	-37.1838	-37.5758
37.9717	113.502	-37.081	-37.1059
37.9717	113.502	-36.4819	-35.7164
37.9717	113.502	-36.2075	-35.6078
37.9717	113.503	-36.262	-35.4395
37.9717	113.503	-36.2875	-35.2712
37.9717	113.503	-36.438	-35.1554
37.9717	113.503	-35.8374	-34.5197
37.9717	113.503	-35.2091	-33.8839
37.9717	113.503	-34.8033	-33.8516
37.9717	113.503	-35.3139	-35.0585
37.9717	113.503	-35.2889	-35.7106
37.9717	113.504	-34.448	-35.2072
37.9717	113.504	-34.2015	-35.0758
37.9717	113.504	-35.3489	-36.4747
37.9717	113.504	-35.8222	-36.5844
37.9717	113.504	-34.1906	-33.8777
37.9717	113.504	-31.7799	-30.1955
37.9717	113.504	-30.2297	-28.0911
37.9717	113.504	-30.2173	-27.8279
37.9717	113.505	-30.2935	-28.2753
37.9717	113.505	-30.8388	-29.6968
37.9717	113.505	-31.4739	-31.1183
37.9717	113.505	-31.2386	-31.0694
37.9717	113.505	-30.6511	-30.3097
37.9717	113.505	-30.0869	-29.5501
37.9717	113.505	-27.0276	-26.3054
37.9717	113.505	-23.998	-23.0608
37.9717	113.506	-21.0072	-19.8161
37.9717	113.506	-22.8529	-22.3118
37.9717	113.506	-31.8809	-32.7391
37.9717	113.506	-31.1842	-31.6108
37.9717	113.506	-31.0799	-31.4256
37.9717	113.506	-20.8223	-20.46
37.9717	113.507	-20.7599	-20.2503
37.9717	113.507	-20.5454	-19.5515
37.9717	113.507	-20.8181	-19.2732
37.9717	113.507	-21.0001	-19.2658
37.9717	113.507	-20.657	-19.3158
37.9717	113.507	-20.5189	-19.304
37.9716	113.499	1.15558	0.324855
37.9716	113.499	0.626464	-0.221273
37.9716	113.499	0.0915033	-0.7674
37.9716	113.499	-0.604323	-1.45053
37.9716	113.499	-1.68064	-2.23273
37.9716	113.499	-4.22707	-4.27867
37.9716	113.499	-9.01677	-8.33017
37.9716	113.499	-15.4363	-14.0995
37.9716	113.5	-21.9919	-20.4352
37.9716	113.5	-26.6143	-25.1568
37.9716	113.5	-32.0165	-31.5455
37.9716	113.5	-36.1146	-36.3251
37.9716	113.5	-39.7392	-40.5762
37.9716	113.5	-40.4588	-41.7437
37.9716	113.5	-40.8322	-42.6904
37.9716	113.5	-41.1634	-43.6371
37.9716	113.501	-42.8129	-44.8897
37.9716	113.501	-45.0854	-46.6865
37.9716	113.501	-47.1482	-48.2755
37.9716	113.501	-46.9529	-48.0349
37.9716	113.501	-45.4442	-46.3388
37.9716	113.501	-42.6699	-42.9748
37.9716	113.501	-43.3376	-43.7072
37.9716	113.502	-43.5733	-43.9067
37.9716	113.502	-38.1831	-38.5419
37.9716	113.502	-36.8368	-37.1988
37.9716	113.502	-36.2589	-36.4456
37.9716	113.502	-36.0079	-35.9465
37.9716	113.502	-35.7439	-35.4474
37.9716	113.502	-35.8798	-35.4912
37.9716	113.503	-36.0482	-35.5947
37.9716	113.503	-36.1641	-35.6981
37.9716	113.503	-36.3183	-35.8016
37.9716	113.503	-36.1278	-35.2677
37.9716	113.503	-35.9044	-34.7338
37.9716	113.503	-36.5045	-35.5409
37.9716	113.503	-38.1734	-38.2231
37.9716	113.503	-39.1292	-40.0084
37.9716	113.504	-38.2753	-39.4255
37.9716	113.504	-36.7664	-37.86
37.9716	113.504	-36.1536	-37.5496
37.9716	113.504	-36.2426	-37.3222
37.9716	113.504	-35.97	-35.7921
37.9716	113.504	-34.9484	-33.9036
37.9716	113.504	-34.1662	-32.8432
37.9716	113.504	-33.8781	-32.727
37.9716	113.505	-33.7965	-32.9027
37.9716	113.505	-34.0832	-33.4864
37.9716	113.505	-34.5547	-34.07
37.9716	113.505	-33.7611	-33.2751
37.9716	113.505	-32.9263	-32.1883
37.9716	113.505	-32.1608	-31.1015
37.9716	113.505	-29.58	-28.4717
37.9716	113.505	-27.0134	-25.8419
37.9716	113.506	-24.435	-23.2121
37.9716	113.506	-24.435	-23.2121
37.9716	113.506	-30.8678	-31.3749
37.9716	113.506	-30.8678	-31.3749
37.9716	113.506	-30.8678	-31.3749
37.9716	113.507	-20.615	-19.3917
37.9716	113.507	-20.5667	-18.9535
37.9716	113.507	-20.8557	-19.0622
37.9716	113.507	-20.9456	-20.4768
37.9716	113.507	-20.9456	-20.4768
37.9716	113.507	-20.9456	-20.4768
37.9716	113.508	-19.7851	-18.2818
37.9715	113.499	1.01799	-0.00758042
37.9715	113.499	0.778294	-0.10769
37.9715	113.499	0.523141	-0.207799
37.9715	113.499	0.0027204	-0.540335
37.9715	113.499	-1.15632	-1.50844
37.9715	113.499	-3.79524	-3.73374
37.9715	113.499	-9.06779	-8.21069
37.9715	113.499	-14.7796	-13.204
37.9715	113.5	-20.8544	-18.8782
37.9715	113.5	-24.8937	-22.9798
37.9715	113.5	-33.4638	-32.8375
37.9715	113.5	-37.3923	-37.5376
37.9715	113.5	-40.4291	-41.1932
37.9715	113.5	-41.138	-42.3001
37.9715	113.5	-41.9081	-43.4876
37.9715	113.5	-42.6016	-44.6751
37.9715	113.501	-43.7366	-45.4484
37.9715	113.501	-46.4761	-47.5209
37.9715	113.501	-46.1795	-47.3188
37.9715	113.501	-45.4823	-46.6792
37.9715	113.501	-44.9615	-45.9179
37.9715	113.501	-44.1365	-44.7673
37.9715	113.501	-43.9762	-44.3439
37.9715	113.502	-44.0006	-44.2573
37.9715	113.502	-42.941	-43.2475
37.9715	113.502	-35.854	-36.118
37.9715	113.502	-35.4348	-35.5822
37.9715	113.502	-35.4905	-35.4922
37.9715	113.502	-35.0341	-34.951
37.9715	113.502	-34.7327	-34.5772
37.9715	113.503	-34.1986	-34.1501
37.9715	113.503	-34.5353	-34.5069
37.9715	113.503	-34.8685	-34.8638
37.9715	113.503	-37.25	-36.513
37.9715	113.503	-39.206	-37.8295
37.9715	113.503	-41.6614	-40.3715
37.9715	113.503	-43.0419	-42.8225
37.9715	113.503	-43.394	-44.3233
37.9715	113.504	-42.4576	-43.8193
37.9715	113.504	-40.5499	-41.8394
37.9715	113.504	-38.9954	-40.5591
37.9715	113.504	-38.5964	-39.7986
37.9715	113.504	-39.2485	-39.0289
37.9715	113.504	-39.2847	-38.5095
37.9715	113.504	-39.7832	-38.8646
37.9715	113.504	-40.2383	-39.4794
37.9715	113.505	-40.3414	-40.1568
37.9715	113.505	-40.4292	-40.2822
37.9715	113.505	-40.6058	-40.4075
37.9715	113.505	-38.3199	-38.4297
37.9715	113.505	-36.5133	-36.3893
37.9715	113.505	-34.7381	-34.3488
37.9715	113.505	-32.2209	-31.6869
37.9715	113.505	-30.1961	-29.6902
37.9715	113.506	-28.1585	-27.6936
37.9715	113.506	-29.8997	-30.0094
37.9715	113.506	-31.6113	-32.5346
37.9715	113.506	-30.4521	-31.1132
37.9715	113.506	-29.5681	-29.9443
37.9715	113.507	-20.8301	-18.8804
37.9715	113.507	-20.9763	-18.9748
37.9715	113.507	-21.4781	-19.2891
37.9715	113.507	-21.6266	-19.3834
37.9715	113.507	-21.0688	-20.9813
37.9715	113.507	-20.9479	-20.7586
37.9715	113.507	-20.3306	-19.4424
37.9715	113.508	-21.0732	-18.2551
37.9714	113.499	2.14793	1.37936
37.9714	113.499	1.66551	1.00293
37.9714	113.499	1.17077	0.626496
37.9714	113.499	-0.185287	-0.514594
37.9714	113.499	-1.83837	-1.97165
37.9714	113.499	-5.44103	-5.10164
37.9714	113.499	-9.6348	-8.70918
37.9714	113.499	-13.9592	-12.4566
37.9714	113.5	-21.0418	-19.6532
37.9714	113.5	-39.4113	-39.9373
37.9714	113.5	-40.1876	-40.9654
37.9714	113.5	-40.6874	-41.6695
37.9714	113.5	-42.3287	-43.5832
37.9714	113.5	-43.8941	-45.4968
37.9714	113.501	-44.579	-45.86
37.9714	113.501	-45.2088	-46.3424
37.9714	113.501	-46.0995	-47.2044
37.9714	113.501	-45.7733	-46.9008
37.9714	113.501	-45.4861	-46.4958
37.9714	113.501	-43.3763	-43.5581
37.9714	113.502	-43.2733	-43.3862
37.9714	113.502	-43.3042	-43.3766
37.9714	113.502	-34.7005	-35.1108
37.9714	113.502	-34.7005	-35.1108
37.9714	113.502	-34.9127	-35.2015
37.9714	113.502	-33.566	-33.8148
37.9714	113.502	-32.248	-32.428
37.9714	113.503	-31.8503	-32.0839
37.9714	113.503	-33.434	-33.4979
37.9714	113.503	-34.9999	-34.912
37.9714	113.503	-39.4042	-38.4938
37.9714	113.503	-42.9998	-41.3326
37.9714	113.503	-46.4648	-44.8706
37.9714	113.503	-46.7556	-46.269
37.9714	113.503	-46.7928	-47.3347
37.9714	113.504	-45.9181	-47.3907
37.9714	113.504	-44.9449	-46.4371
37.9714	113.504	-44.3862	-45.5055
37.9714	113.504	-44.4399	-44.8457
37.9714	113.504	-44.6954	-44.4575
37.9714	113.504	-44.9525	-44.3797
37.9714	113.504	-46.543	-45.8425
37.9714	113.504	-47.7918	-47.3442
37.9714	113.505	-48.5147	-48.6421
37.9714	113.505	-47.7385	-48.0128
37.9714	113.505	-47.2378	-47.3834
37.9714	113.505	-43.8727	-44.3485
37.9714	113.505	-40.9723	-41.3727
37.9714	113.505	-38.0315	-38.3968
37.9714	113.505	-35.2022	-35.5074
37.9714	113.505	-33.5287	-33.9682
37.9714	113.506	-31.9228	-32.4289
37.9714	113.506	-34.2225	-35.4225
37.9714	113.506	-33.8522	-35.124
37.9714	113.506	-31.8814	-32.8767
37.9714	113.506	-29.1752	-29.5446
37.9714	113.506	-27.9381	-27.8193
37.9714	113.506	-27.5741	-27.3017
37.9714	113.507	-21.8412	-19.6114
37.9714	113.507	-22.2238	-19.8659
37.9714	113.507	-22.2802	-19.9008
37.9714	113.507	-20.4488	-19.8305
37.9714	113.507	-20.1731	-19.2291
37.9714	113.507	-19.2139	-17.2246
37.9714	113.508	-18.9437	-16.6233
37.9714	113.508	-23.4263	-19.2537
37.9714	113.508	-23.4263	-19.2537
37.9712	113.499	4.02039	3.73609
37.9712	113.499	2.91032	2.71499
37.9712	113.499	1.3145	1.18942
37.9712	113.499	-1.32901	-1.28304
37.9712	113.499	-3.92489	-3.68693
37.9712	113.499	-7.55915	-6.97652
37.9712	113.499	-11.547	-10.5665
37.9712	113.499	-14.3733	-13.061
37.9712	113.5	-23.0886	-22.2223
37.9712	113.5	-32.4538	-32.3976
37.9712	113.5	-43.017	-44.1918
37.9712	113.5	-41.3519	-42.3557
37.9712	113.5	-39.9437	-40.9277
37.9712	113.5	-40.4263	-41.5878
37.9712	113.5	-44.7578	-45.8318
37.9712	113.501	-45.1965	-46.2169
37.9712	113.501	-45.2385	-46.2573
37.9712	113.501	-47.5485	-48.3645
37.9712	113.501	-47.5485	-48.3645
37.9712	113.501	-47.5485	-48.3645
37.9712	113.501	-41.8326	-41.7884
37.9712	113.502	-41.8326	-41.7884
37.9712	113.502	-41.8326	-41.7884
37.9712	113.502	-34.6323	-35.4148
37.9712	113.502	-34.7533	-35.5617
37.9712	113.502	-35.69	-36.35
37.9712	113.502	-31.2912	-31.7306
37.9712	113.503	-30.5345	-30.8868
37.9712	113.503	-33.8198	-33.7974
37.9712	113.503	-37.1131	-36.708
37.9712	113.503	-41.8196	-40.7127
37.9712	113.503	-44.6744	-42.9973
37.9712	113.503	-47.625	-45.8971
37.9712	113.503	-47.5926	-47.1276
37.9712	113.503	-48.5852	-49.1404
37.9712	113.504	-49.5159	-51.0891
37.9712	113.504	-51.3251	-52.1363
37.9712	113.504	-51.693	-52.115
37.9712	113.504	-51.45	-51.5792
37.9712	113.504	-51.6403	-51.3663
37.9712	113.504	-51.8612	-51.4396
37.9712	113.504	-53.603	-53.1272
37.9712	113.504	-55.0198	-54.7782
37.9712	113.505	-55.5137	-56.2045
37.9712	113.505	-53.4679	-54.1445
37.9712	113.505	-51.2754	-52.0845
37.9712	113.505	-47.3255	-47.8347
37.9712	113.505	-44.0373	-44.5684
37.9712	113.505	-40.706	-41.3021
37.9712	113.505	-38.0531	-38.6629
37.9712	113.506	-35.1395	-36.5658
37.9712	113.506	-36.8547	-38.6688
37.9712	113.506	-36.3146	-38.0202
37.9712	113.506	-27.6113	-27.2859
37.9712	113.506	-26.8316	-26.127
37.9712	113.506	-26.8851	-26.0555
37.9712	113.507	-22.8853	-20.4957
37.9712	113.507	-22.8853	-20.4957
37.9712	113.507	-22.8853	-20.4957
37.9712	113.507	-19.3985	-17.0284
37.9712	113.507	-18.86	-15.715
37.9712	113.508	-18.7636	-15.4923
37.9712	113.508	-22.0913	-17.1693
37.9712	113.508	-21.928	-17.0576
37.9711	113.499	5.76271	5.59386
37.9711	113.499	3.82646	4.02091
37.9711	113.499	0.781303	1.19573
37.9711	113.499	-3.60532	-2.94231
37.9711	113.499	-7.27036	-6.46455
37.9711	113.499	-11.0058	-10.1363
37.9711	113.499	-14.7475	-13.7188
37.9711	113.499	-17.3163	-16.166
37.9711	113.5	-27.0538	-26.5026
37.9711	113.5	-35.3534	-35.6156
37.9711	113.5	-42.7097	-43.9484
37.9711	113.5	-41.774	-43.0102
37.9711	113.5	-40.7353	-42.0721
37.9711	113.5	-40.9898	-42.6567
37.9711	113.5	-43.0059	-44.311
37.9711	113.5	-44.9716	-45.9653
37.9711	113.501	-45.311	-46.3256
37.9711	113.501	-45.311	-46.3256
37.9711	113.501	-50.2742	-50.6606
37.9711	113.501	-50.4511	-50.8474
37.9711	113.501	-51.7331	-52.1455
37.9711	113.501	-43.4552	-43.3349
37.9711	113.502	-41.3999	-41.1795
37.9711	113.502	-42.7825	-42.5615
37.9711	113.502	-37.6392	-38.4106
37.9711	113.502	-35.9689	-36.8888
37.9711	113.502	-37.2973	-38.2107
37.9711	113.502	-34.7978	-35.5012
37.9711	113.502	-32.2693	-32.7916
37.9711	113.503	-32.6378	-32.7787
37.9711	113.503	-37.434	-37.1932
37.9711	113.503	-41.7487	-41.1403
37.9711	113.503	-43.7512	-42.6963
37.9711	113.503	-43.6098	-42.2922
37.9711	113.503	-45.5633	-44.3198
37.9711	113.503	-47.8128	-47.3548
37.9711	113.503	-51.228	-51.8647
37.9711	113.504	-54.5951	-55.992
37.9711	113.504	-57.4164	-58.3219
37.9711	113.504	-57.6794	-58.4506
37.9711	113.504	-57.0579	-57.4283
37.9711	113.504	-57.7588	-57.5633
37.9711	113.504	-58.7896	-58.4248
37.9711	113.504	-59.4883	-59.0984
37.9711	113.504	-59.3625	-59.3413
37.9711	113.505	-58.6501	-59.3518
37.9711	113.505	-55.2149	-56.2293
37.9711	113.505	-52.3815	-53.1068
37.9711	113.505	-48.2961	-48.6962
37.9711	113.505	-45.5921	-46.0162
37.9711	113.505	-42.7616	-43.3362
37.9711	113.505	-42.1108	-42.9135
37.9711	113.506	-39.3803	-41.1954
37.9711	113.506	-38.2834	-40.1722
37.9711	113.506	-38.2834	-40.1722
37.9711	113.506	-26.577	-25.5791
37.9711	113.506	-26.6939	-25.666
37.9711	113.506	-27.0269	-25.9557
37.9711	113.506	-27.1322	-26.0426
37.9711	113.507	-23.3364	-20.9113
37.9711	113.507	-23.3364	-20.9113
37.9711	113.507	-23.3364	-20.9113
37.9711	113.507	-19.6699	-16.0365
37.9711	113.507	-19.6699	-16.0365
37.9711	113.508	-19.6699	-16.0365
37.9711	113.508	-19.7587	-14.4146
37.9711	113.508	-19.7587	-14.4146
37.9711	113.508	-19.4952	-14.5425
37.971	113.498	6.6568	5.7635
37.971	113.499	6.09406	6.11911
37.971	113.499	3.25675	4.09095
37.971	113.499	-0.95311	0.123598
37.971	113.499	-6.06367	-4.77201
37.971	113.499	-10.0215	-8.73906
37.971	113.499	-13.5677	-12.4464
37.971	113.499	-17.9709	-16.8401
37.971	113.499	-21.1815	-20.0694
37.971	113.5	-28.9902	-28.5414
37.971	113.5	-35.0897	-35.3988
37.971	113.5	-40.6474	-41.8661
37.971	113.5	-41.2843	-42.6267
37.971	113.5	-41.8803	-43.3873
37.971	113.5	-43.0476	-44.868
37.971	113.5	-43.7663	-45.4463
37.971	113.5	-44.7355	-46.2563
37.971	113.501	-45.3744	-46.7362
37.971	113.501	-46.0267	-47.4607
37.971	113.501	-52.2383	-52.5574
37.971	113.501	-53.2	-53.4898
37.971	113.501	-54.6914	-55.1709
37.971	113.501	-50.9152	-51.0393
37.971	113.501	-46.6361	-46.4947
37.971	113.502	-42.9694	-42.6569
37.971	113.502	-45.047	-44.7953
37.971	113.502	-43.7475	-43.6816
37.971	113.502	-39.0385	-39.8832
37.971	113.502	-40.1702	-41.0065
37.971	113.502	-37.7876	-38.4488
37.971	113.502	-35.3766	-35.891
37.971	113.503	-35.1169	-35.3589
37.971	113.503	-40.7479	-40.5988
37.971	113.503	-44.8172	-44.3788
37.971	113.503	-44.8898	-44.1487
37.971	113.503	-41.8509	-40.9981
37.971	113.503	-45.1073	-44.3689
37.971	113.503	-50.3552	-50.2961
37.971	113.503	-57.0639	-57.7885
37.971	113.504	-60.6595	-61.7848
37.971	113.504	-62.8762	-63.8326
37.971	113.504	-62.6654	-63.3807
37.971	113.504	-61.862	-62.2625
37.971	113.504	-63.1997	-63.1262
37.971	113.504	-65.3208	-64.9243
37.971	113.504	-63.7454	-63.7087
37.971	113.504	-61.6735	-61.5941
37.971	113.505	-59.024	-59.4794
37.971	113.505	-55.5041	-56.3386
37.971	113.505	-52.575	-53.1977
37.971	113.505	-48.7764	-49.2587
37.971	113.505	-46.8403	-47.3968
37.971	113.505	-44.8301	-45.535
37.971	113.505	-44.1198	-45.1871
37.971	113.505	-42.3023	-43.6398
37.971	113.506	-40.4902	-42.1208
37.971	113.506	-38.6799	-40.3957
37.971	113.506	-38.8857	-40.4875
37.971	113.506	-27.2076	-26.0442
37.971	113.506	-27.4704	-26.2441
37.971	113.506	-27.502	-26.2762
37.971	113.507	-23.5576	-21.0075
37.971	113.507	-23.5576	-21.0075
37.971	113.507	-23.5576	-21.0075
37.971	113.507	-21.9015	-19.2563
37.971	113.507	-21.2016	-17.9959
37.971	113.508	-21.724	-18.4391
37.971	113.508	-19.3677	-14.4375
37.971	113.508	-17.8802	-12.5353
37.971	113.508	-17.6939	-13.002
37.971	113.508	-17.8627	-13.5663
37.9709	113.498	6.77966	6.10556
37.9709	113.499	5.47395	6.00377
37.9709	113.499	1.60806	3.32071
37.9709	113.499	-3.1881	-1.48091
37.9709	113.499	-8.57227	-6.95098
37.9709	113.499	-12.0546	-10.6057
37.9709	113.499	-15.6881	-14.4824
37.9709	113.499	-20.8173	-19.6746
37.9709	113.499	-25.3011	-24.2813
37.9709	113.5	-31.3241	-31.0133
37.9709	113.5	-35.3239	-35.7614
37.9709	113.5	-39.1802	-40.5094
37.9709	113.5	-41.2564	-42.6113
37.9709	113.5	-43.292	-44.7131
37.9709	113.5	-45.3103	-46.8149
37.9709	113.5	-45.1019	-46.6728
37.9709	113.5	-45.5537	-47.2416
37.9709	113.501	-46.0057	-47.8104
37.9709	113.501	-47.0238	-48.8531
37.9709	113.501	-48.0601	-49.4663
37.9709	113.501	-54.2726	-54.6093
37.9709	113.501	-55.1228	-55.5897
37.9709	113.501	-53.162	-53.4441
37.9709	113.502	-45.4675	-45.1721
37.9709	113.502	-46.8346	-46.6011
37.9709	113.502	-47.0583	-46.8387
37.9709	113.502	-43.6888	-44.3948
37.9709	113.502	-43.6888	-44.3948
37.9709	113.502	-40.7538	-41.4291
37.9709	113.502	-37.7175	-38.4633
37.9709	113.503	-37.6401	-38.2341
37.9709	113.503	-43.6268	-43.8198
37.9709	113.503	-47.3245	-47.156
37.9709	113.503	-46.2034	-45.7858
37.9709	113.503	-42.9574	-42.4846
37.9709	113.503	-48.2962	-47.8797
37.9709	113.503	-56.1859	-56.1797
37.9709	113.503	-63.6453	-64.3482
37.9709	113.504	-67.0165	-67.8333
37.9709	113.504	-68.1893	-68.826
37.9709	113.504	-67.8882	-68.3397
37.9709	113.504	-66.8977	-67.213
37.9709	113.504	-68.5218	-68.7668
37.9709	113.504	-71.2415	-71.0129
37.9709	113.504	-67.2888	-67.0164
37.9709	113.504	-62.0207	-61.8968
37.9709	113.505	-56.6597	-56.7772
37.9709	113.505	-54.2746	-54.52
37.9709	113.505	-51.7256	-52.2628
37.9709	113.505	-49.0156	-49.6927
37.9709	113.505	-47.6397	-48.4719
37.9709	113.505	-46.2743	-47.2511
37.9709	113.505	-45.3996	-46.6613
37.9709	113.505	-43.8276	-45.2231
37.9709	113.506	-41.5922	-43.0916
37.9709	113.506	-39.1278	-40.6022
37.9709	113.506	-39.2208	-40.7159
37.9709	113.506	-39.3793	-40.7501
37.9709	113.506	-27.7572	-26.3379
37.9709	113.506	-27.7572	-26.3379
37.9709	113.506	-27.7572	-26.3379
37.9709	113.507	-24.9548	-22.9957
37.9709	113.507	-24.9548	-22.9957
37.9709	113.507	-24.9548	-22.9957
37.9709	113.507	-23.8919	-22.5609
37.9709	113.507	-23.6328	-22.0567
37.9709	113.507	-22.7255	-20.3761
37.9709	113.508	-23.3006	-20.5425
37.9709	113.508	-22.4842	-18.6378
37.9709	113.508	-22.2616	-18.1338
37.9709	113.508	-19.9147	-15.2324
37.9709	113.508	-18.8318	-14.6618
37.9709	113.508	-17.8559	-14.0173
37.9707	113.498	5.11135	4.77169
37.9707	113.499	2.27164	3.32122
37.9707	113.499	-2.76891	-0.449534
37.9707	113.499	-7.02839	-5.09009
37.9707	113.499	-11.6702	-10.0553
37.9707	113.499	-14.8405	-13.2901
37.9707	113.499	-18.5026	-17.0451
37.9707	113.499	-23.8978	-22.6769
37.9707	113.499	-28.63	-27.7188
37.9707	113.5	-33.6557	-33.5216
37.9707	113.5	-36.5199	-37.123
37.9707	113.5	-39.2745	-40.7243
37.9707	113.5	-41.9059	-43.1835
37.9707	113.5	-44.7322	-45.8406
37.9707	113.5	-47.5368	-48.4978
37.9707	113.5	-48.0332	-48.8413
37.9707	113.501	-47.9802	-49.5378
37.9707	113.501	-48.0014	-49.8236
37.9707	113.501	-48.142	-49.7846
37.9707	113.501	-52.8663	-52.9997
37.9707	113.501	-53.4283	-53.6254
37.9707	113.501	-53.4283	-53.6254
37.9707	113.502	-46.9874	-46.6488
37.9707	113.502	-46.9874	-46.6488
37.9707	113.502	-45.1028	-44.8938
37.9707	113.502	-42.6444	-43.3293
37.9707	113.502	-44.6222	-45.2835
37.9707	113.502	-42.0737	-42.9385
37.9707	113.502	-39.44	-40.5936
37.9707	113.503	-39.0991	-40.3303
37.9707	113.503	-45.5413	-46.3734
37.9707	113.503	-49.7306	-50.1234
37.9707	113.503	-49.4737	-49.4335
37.9707	113.503	-47.3828	-47.1375
37.9707	113.503	-53.3236	-53.1239
37.9707	113.503	-61.7214	-61.9297
37.9707	113.503	-69.0668	-69.6978
37.9707	113.504	-71.7404	-72.3276
37.9707	113.504	-71.8929	-72.3416
37.9707	113.504	-71.0353	-71.3492
37.9707	113.504	-70.1052	-70.4456
37.9707	113.504	-71.7248	-72.1768
37.9707	113.504	-73.6507	-74.0565
37.9707	113.504	-68.2901	-68.2433
37.9707	113.504	-61.7426	-61.4903
37.9707	113.505	-54.9803	-54.7373
37.9707	113.505	-53.2967	-53.2217
37.9707	113.505	-51.2332	-51.7061
37.9707	113.505	-49.3802	-50.1906
37.9707	113.505	-48.1542	-49.2017
37.9707	113.505	-46.953	-48.2128
37.9707	113.505	-45.772	-47.2239
37.9707	113.505	-44.8101	-46.2536
37.9707	113.506	-39.2809	-40.3024
37.9707	113.506	-39.4359	-40.3061
37.9707	113.506	-39.4808	-40.3187
37.9707	113.506	-28.8916	-27.6898
37.9707	113.506	-28.8916	-27.6898
37.9707	113.506	-28.8916	-27.6898
37.9707	113.507	-27.8745	-27.1951
37.9707	113.507	-27.8745	-27.1951
37.9707	113.507	-27.9348	-27.2594
37.9707	113.507	-25.7243	-24.9739
37.9707	113.507	-24.979	-24.1716
37.9707	113.507	-24.4355	-22.8879
37.9707	113.508	-24.5847	-21.1806
37.9707	113.508	-24.6066	-21.0921
37.9707	113.508	-21.9753	-17.9712
37.9707	113.508	-19.9391	-15.9817
37.9707	113.508	-17.9329	-14.0339
37.9707	113.508	-18.7157	-15.601
37.9706	113.498	3.11756	2.85343
37.9706	113.499	-2.0177	-0.82028
37.9706	113.499	-8.71722	-6.39005
37.9706	113.499	-11.9148	-10.1821
37.9706	113.499	-15.4527	-14.0904
37.9706	113.499	-17.8352	-16.3363
37.9706	113.499	-21.0784	-19.4755
37.9706	113.499	-25.0282	-23.9021
37.9706	113.499	-28.6071	-28.095
37.9706	113.5	-32.1212	-32.4076
37.9706	113.5	-35.1296	-36.0671
37.9706	113.5	-38.0399	-39.7267
37.9706	113.5	-39.8359	-41.4516
37.9706	113.5	-43.6926	-44.8016
37.9706	113.5	-47.4842	-48.1517
37.9706	113.5	-50.8412	-50.9728
37.9706	113.5	-50.4974	-51.005
37.9706	113.501	-49.6107	-50.7068
37.9706	113.501	-48.3863	-49.9779
37.9706	113.501	-48.3451	-49.685
37.9706	113.501	-49.8185	-50.0909
37.9706	113.501	-50.6367	-50.5538
37.9706	113.501	-50.9991	-51.0152
37.9706	113.501	-51.0818	-50.9809
37.9706	113.502	-46.0424	-45.6071
37.9706	113.502	-45.2118	-44.7965
37.9706	113.502	-42.364	-42.1884
37.9706	113.502	-40.4913	-40.9447
37.9706	113.502	-38.7891	-39.7009
37.9706	113.502	-42.0287	-42.8597
37.9706	113.502	-41.331	-42.4231
37.9706	113.502	-40.6076	-41.9866
37.9706	113.503	-42.4716	-43.9273
37.9706	113.503	-48.6264	-49.815
37.9706	113.503	-53.2272	-53.9728
37.9706	113.503	-53.0313	-53.2531
37.9706	113.503	-53.4565	-53.3319
37.9706	113.503	-58.6766	-58.5338
37.9706	113.503	-65.893	-66.0445
37.9706	113.503	-71.1147	-71.554
37.9706	113.504	-73.9968	-74.3243
37.9706	113.504	-73.9558	-74.2186
37.9706	113.504	-72.9118	-73.1849
37.9706	113.504	-71.6418	-72.091
37.9706	113.504	-72.7365	-73.2785
37.9706	113.504	-73.817	-74.4659
37.9706	113.504	-68.0087	-67.9794
37.9706	113.504	-61.0365	-60.6826
37.9706	113.505	-53.877	-53.3859
37.9706	113.505	-52.4573	-52.2062
37.9706	113.505	-50.8407	-51.165
37.9706	113.505	-49.2258	-50.1237
37.9706	113.505	-47.9302	-49.133
37.9706	113.505	-46.7378	-48.1424
37.9706	113.505	-45.7205	-47.1518
37.9706	113.505	-45.5641	-47.0138
37.9706	113.506	-39.7103	-40.3479
37.9706	113.506	-38.7693	-39.2969
37.9706	113.506	-38.7693	-39.2969
37.9706	113.506	-31.0044	-30.4461
37.9706	113.506	-31.0044	-30.4461
37.9706	113.506	-31.7669	-31.6568
37.9706	113.507	-32.7266	-33.2927
37.9706	113.507	-31.5168	-32.0595
37.9706	113.507	-30.7263	-30.8452
37.9706	113.507	-28.7259	-28.504
37.9706	113.507	-27.1713	-26.4949
37.9706	113.507	-26.3054	-25.728
37.9706	113.507	-26.0488	-24.7759
37.9706	113.508	-25.6516	-23.2687
37.9706	113.508	-25.848	-22.6888
37.9706	113.508	-25.7061	-22.5009
37.9706	113.508	-22.822	-19.2066
37.9706	113.508	-19.9691	-16.006
37.9706	113.508	-18.209	-14.147
37.9706	113.508	-19.1782	-15.7885
37.9706	113.508	-20.0487	-16.9297
37.9705	113.498	1.97664	1.58523
37.9705	113.499	-5.42734	-4.48583
37.9705	113.499	-13.7174	-11.8058
37.9705	113.499	-15.5561	-14.3035
37.9705	113.499	-17.9871	-17.0511
37.9705	113.499	-20.1796	-18.9171
37.9705	113.499	-22.7041	-21.0459
37.9705	113.499	-24.3716	-23.4214
37.9705	113.499	-25.4156	-25.4295
37.9705	113.5	-26.8101	-27.6347
37.9705	113.5	-30.3295	-31.5947
37.9705	113.5	-33.5648	-35.5547
37.9705	113.5	-35.8232	-37.8894
37.9705	113.5	-41.2058	-42.5258
37.9705	113.5	-46.2631	-46.8419
37.9705	113.5	-51.3954	-51.2726
37.9705	113.5	-50.2675	-50.4084
37.9705	113.501	-47.7339	-48.6135
37.9705	113.501	-47.7106	-48.5929
37.9705	113.501	-48.706	-48.8098
37.9705	113.501	-49.5177	-49.3184
37.9705	113.501	-50.0107	-49.9003
37.9705	113.501	-50.3579	-50.1285
37.9705	113.501	-47.6778	-47.2904
37.9705	113.502	-44.8799	-44.4522
37.9705	113.502	-42.8193	-42.4461
37.9705	113.502	-40.6812	-40.3784
37.9705	113.502	-38.6483	-39.1013
37.9705	113.502	-37.0341	-38.1151
37.9705	113.502	-39.7174	-40.8685
37.9705	113.502	-40.8563	-42.2257
37.9705	113.502	-42.8215	-44.1703
37.9705	113.503	-47.0859	-48.2447
37.9705	113.503	-53.0135	-53.9883
37.9705	113.503	-56.8904	-57.5912
37.9705	113.503	-56.4079	-56.6667
37.9705	113.503	-58.3598	-58.2149
37.9705	113.503	-62.9669	-62.7089
37.9705	113.503	-68.6055	-68.7308
37.9705	113.503	-71.7938	-72.018
37.9705	113.504	-73.5207	-73.6221
37.9705	113.504	-73.2709	-73.3944
37.9705	113.504	-72.1403	-72.3646
37.9705	113.504	-71.2052	-71.6216
37.9705	113.504	-71.5779	-71.7856
37.9705	113.504	-71.7359	-71.9497
37.9705	113.504	-66.9634	-66.8383
37.9705	113.504	-60.4444	-60.0331
37.9705	113.505	-53.7131	-53.2279
37.9705	113.505	-51.252	-50.9533
37.9705	113.505	-49.7897	-50.2612
37.9705	113.505	-48.5272	-49.569
37.9705	113.505	-47.2516	-48.7519
37.9705	113.505	-46.3783	-47.9348
37.9705	113.505	-45.5946	-47.1178
37.9705	113.505	-45.3877	-46.8263
37.9705	113.506	-42.7155	-43.6968
37.9705	113.506	-39.6541	-40.5674
37.9705	113.506	-38.2314	-38.5385
37.9705	113.506	-38.2314	-38.5385
37.9705	113.506	-32.9616	-33.0493
37.9705	113.506	-32.9616	-33.0493
37.9705	113.506	-34.2335	-34.5171
37.9705	113.507	-35.1442	-35.7223
37.9705	113.507	-35.8999	-36.9276
37.9705	113.507	-34.7518	-35.5989
37.9705	113.507	-32.2158	-32.3671
37.9705	113.507	-29.4324	-28.9437
37.9705	113.507	-28.0734	-27.3044
37.9705	113.507	-27.473	-26.7688
37.9705	113.508	-25.6099	-23.0346
37.9705	113.508	-25.6912	-22.7566
37.9705	113.508	-25.0797	-21.7301
37.9705	113.508	-20.2631	-15.4321
37.9705	113.508	-19.0926	-14.6592
37.9705	113.508	-19.6734	-16.0419
37.9705	113.508	-20.196	-17.049
37.9704	113.498	1.17948	0.540317
37.9704	113.499	-7.33249	-6.63183
37.9704	113.499	-16.1675	-14.5264
37.9704	113.499	-16.8472	-15.9713
37.9704	113.499	-18.4714	-17.9956
37.9704	113.499	-20.6244	-19.8768
37.9704	113.499	-23.0521	-21.7913
37.9704	113.499	-23.4917	-22.906
37.9704	113.499	-23.059	-23.4413
37.9704	113.5	-22.7679	-23.7904
37.9704	113.5	-26.1289	-27.6006
37.9704	113.5	-29.4925	-31.4108
37.9704	113.5	-32.0004	-34.0854
37.9704	113.5	-36.8908	-38.4291
37.9704	113.5	-43.2591	-43.9696
37.9704	113.5	-50.3163	-50.1469
37.9704	113.5	-48.8075	-48.7053
37.9704	113.501	-47.7731	-47.7568
37.9704	113.501	-46.7176	-46.8083
37.9704	113.501	-46.864	-46.8968
37.9704	113.501	-47.4942	-47.2769
37.9704	113.501	-50.7689	-50.3983
37.9704	113.501	-51.0031	-50.589
37.9704	113.501	-48.543	-47.9662
37.9704	113.502	-45.9717	-45.3433
37.9704	113.502	-43.2618	-42.6698
37.9704	113.502	-42.4735	-41.7802
37.9704	113.502	-40.927	-40.8906
37.9704	113.502	-39.6721	-40.4149
37.9704	113.502	-41.3163	-42.1637
37.9704	113.502	-42.2915	-43.9126
37.9704	113.502	-46.655	-47.8822
37.9704	113.503	-52.7118	-53.3679
37.9704	113.503	-57.6305	-57.9656
37.9704	113.503	-58.6688	-58.8136
37.9704	113.503	-57.2171	-57.118
37.9704	113.503	-60.379	-60.0887
37.9704	113.503	-65.0068	-64.8806
37.9704	113.503	-69.7956	-70.0525
37.9704	113.503	-71.6794	-71.84
37.9704	113.504	-72.9059	-72.9214
37.9704	113.504	-72.4366	-72.4401
37.9704	113.504	-71.4769	-71.5649
37.9704	113.504	-70.7436	-70.7785
37.9704	113.504	-69.9702	-69.9137
37.9704	113.504	-69.1025	-69.0488
37.9704	113.504	-65.6539	-65.5176
37.9704	113.504	-60.5228	-60.2325
37.9704	113.505	-55.127	-54.9474
37.9704	113.505	-52.261	-52.0872
37.9704	113.505	-51.0925	-51.3953
37.9704	113.505	-49.4994	-50.7033
37.9704	113.505	-48.201	-49.9697
37.9704	113.505	-47.2466	-48.8912
37.9704	113.505	-46.3291	-47.8127
37.9704	113.505	-45.5401	-46.9031
37.9704	113.506	-43.1543	-44.1307
37.9704	113.506	-40.7635	-41.3584
37.9704	113.506	-38.3836	-38.6116
37.9704	113.506	-38.3836	-38.6116
37.9704	113.506	-33.8313	-34.0948
37.9704	113.506	-33.8313	-34.0948
37.9704	113.506	-35.1247	-35.4316
37.9704	113.507	-35.8094	-36.4731
37.9704	113.507	-36.4226	-37.5147
37.9704	113.507	-35.8665	-36.7032
37.9704	113.507	-30.3808	-29.8099
37.9704	113.507	-29.923	-29.1773
37.9704	113.507	-29.923	-29.1773
37.9704	113.508	-25.1858	-22.579
37.9704	113.508	-25.1858	-22.579
37.9704	113.508	-24.1671	-20.7674
37.9704	113.508	-22.3298	-17.8596
37.9704	113.508	-20.3109	-14.9655
37.9704	113.508	-19.6146	-15.2766
37.9704	113.508	-19.392	-15.9358
37.9704	113.508	-19.4041	-16.1297
37.9704	113.509	-19.6073	-15.7064
37.9702	113.498	0.456797	-0.596932
37.9702	113.499	-7.43623	-7.06538
37.9702	113.499	-15.4791	-14.1869
37.9702	113.499	-15.8858	-15.493
37.9702	113.499	-17.6287	-17.83
37.9702	113.499	-20.5259	-20.5448
37.9702	113.499	-23.1744	-22.6067
37.9702	113.499	-24.1892	-23.9362
37.9702	113.499	-23.8412	-24.2348
37.9702	113.5	-23.7881	-24.5334
37.9702	113.5	-26.4967	-27.5013
37.9702	113.5	-29.0526	-30.4692
37.9702	113.5	-31.9028	-33.4371
37.9702	113.5	-34.826	-36.1331
37.9702	113.5	-46.6402	-46.6618
37.9702	113.5	-45.2873	-45.4002
37.9702	113.501	-44.9219	-44.947
37.9702	113.501	-44.6295	-44.4938
37.9702	113.501	-44.7187	-44.361
37.9702	113.501	-44.7187	-44.361
37.9702	113.501	-51.6411	-51.1298
37.9702	113.501	-51.6411	-51.1298
37.9702	113.501	-50.1149	-49.4085
37.9702	113.502	-48.4703	-47.6872
37.9702	113.502	-46.7152	-45.9659
37.9702	113.502	-46.0073	-45.2303
37.9702	113.502	-44.9711	-44.4947
37.9702	113.502	-44.5522	-44.4212
37.9702	113.502	-46.2871	-45.6227
37.9702	113.502	-46.854	-46.7903
37.9702	113.502	-50.9281	-50.7286
37.9702	113.503	-55.2964	-55.078
37.9702	113.503	-58.942	-58.6986
37.9702	113.503	-57.7744	-57.4606
37.9702	113.503	-56.7532	-56.7726
37.9702	113.503	-60.2787	-60.5698
37.9702	113.503	-65.5023	-65.7927
37.9702	113.503	-70.5223	-70.9842
37.9702	113.503	-72.2558	-72.5796
37.9702	113.504	-73.9277	-74.175
37.9702	113.504	-72.154	-72.2161
37.9702	113.504	-70.3013	-70.1306
37.9702	113.504	-68.3283	-68.1056
37.9702	113.504	-67.5858	-67.3825
37.9702	113.504	-66.7827	-66.6593
37.9702	113.504	-65.4495	-65.4055
37.9702	113.504	-62.2034	-62.062
37.9702	113.505	-58.7964	-58.7186
37.9702	113.505	-55.8236	-55.8453
37.9702	113.505	-54.5415	-54.9299
37.9702	113.505	-52.6562	-54.0146
37.9702	113.505	-51.2282	-53.0992
37.9702	113.505	-49.492	-51.1488
37.9702	113.505	-47.7413	-49.1985
37.9702	113.505	-45.9897	-47.2481
37.9702	113.506	-43.6255	-44.5702
37.9702	113.506	-41.6641	-42.2627
37.9702	113.506	-39.6768	-39.9551
37.9702	113.506	-40.8767	-41.162
37.9702	113.506	-36.2615	-36.3821
37.9702	113.506	-34.6338	-34.7488
37.9702	113.506	-35.1917	-35.324
37.9702	113.507	-35.6296	-35.8992
37.9702	113.507	-35.8701	-36.4744
37.9702	113.507	-35.8701	-36.4744
37.9702	113.507	-31.3299	-30.7094
37.9702	113.507	-31.3299	-30.7094
37.9702	113.507	-29.5334	-28.6341
37.9702	113.508	-23.066	-20.5835
37.9702	113.508	-24.0206	-21.4534
37.9702	113.508	-23.3106	-19.6421
37.9702	113.508	-22.6319	-17.8307
37.9702	113.508	-21.133	-15.7237
37.9702	113.508	-20.0914	-15.8336
37.9702	113.508	-18.9746	-15.6619
37.9702	113.508	-18.435	-15.2278
37.9702	113.509	-18.2791	-14.1951
37.9701	113.498	0.0872197	-1.23157
37.9701	113.499	-6.83044	-6.8969
37.9701	113.499	-14.1997	-13.4822
37.9701	113.499	-15.0566	-15.322
37.9701	113.499	-17.5756	-18.3338
37.9701	113.499	-20.8866	-21.5975
37.9701	113.499	-23.6182	-23.9412
37.9701	113.499	-25.9618	-26.1044
37.9701	113.499	-26.9819	-27.1955
37.9701	113.5	-27.6245	-28.2865
37.9701	113.5	-29.3002	-30.0921
37.9701	113.5	-30.7459	-31.6046
37.9701	113.5	-32.1964	-33.117
37.9701	113.5	-31.4247	-32.2459
37.9701	113.5	-38.9386	-39.3336
37.9701	113.5	-40.7991	-41.1927
37.9701	113.501	-41.1832	-41.3413
37.9701	113.501	-41.5945	-41.49
37.9701	113.501	-41.9955	-41.6386
37.9701	113.501	-43.6563	-43.3615
37.9701	113.501	-51.9691	-52.1462
37.9701	113.501	-51.5801	-51.4644
37.9701	113.501	-50.8347	-50.5586
37.9701	113.502	-49.9745	-49.6527
37.9701	113.502	-49.3542	-48.989
37.9701	113.502	-47.7043	-47.4997
37.9701	113.502	-45.9058	-46.0104
37.9701	113.502	-45.6405	-45.8841
37.9701	113.502	-47.6864	-47.3134
37.9701	113.502	-48.9075	-48.5951
37.9701	113.502	-51.2502	-51.1353
37.9701	113.503	-53.1109	-53.4284
37.9701	113.503	-55.1612	-55.5188
37.9701	113.503	-53.3894	-54.0649
37.9701	113.503	-54.5259	-55.2664
37.9701	113.503	-58.9141	-59.5928
37.9701	113.503	-64.6277	-65.0228
37.9701	113.503	-69.2092	-69.8148
37.9701	113.503	-71.1588	-71.9513
37.9701	113.504	-73.0458	-74.0878
37.9701	113.504	-70.2179	-70.7658
37.9701	113.504	-67.3932	-67.3247
37.9701	113.504	-64.2772	-63.8836
37.9701	113.504	-64.7376	-64.4783
37.9701	113.504	-65.1267	-65.0729
37.9701	113.504	-65.4883	-65.6675
37.9701	113.504	-63.8296	-63.8117
37.9701	113.505	-61.7638	-61.8014
37.9701	113.505	-59.5711	-59.7911
37.9701	113.505	-58.2363	-58.5675
37.9701	113.505	-56.2705	-57.4206
37.9701	113.505	-54.78	-56.2738
37.9701	113.505	-52.2937	-53.6849
37.9701	113.505	-49.9394	-51.1738
37.9701	113.505	-47.6013	-48.6627
37.9701	113.506	-45.4877	-46.376
37.9701	113.506	-43.6121	-44.1957
37.9701	113.506	-41.7223	-42.0155
37.9701	113.506	-43.3965	-43.6819
37.9701	113.506	-41.1155	-41.3269
37.9701	113.506	-38.7731	-38.9719
37.9701	113.506	-36.4382	-36.5688
37.9701	113.506	-36.1806	-36.1915
37.9701	113.507	-35.8713	-35.8143
37.9701	113.507	-35.4815	-35.4371
37.9701	113.507	-35.4815	-35.4371
37.9701	113.507	-32.9806	-32.4892
37.9701	113.507	-32.9806	-32.4892
37.9701	113.507	-29.4437	-28.4124
37.9701	113.507	-25.0094	-23.4233
37.9701	113.508	-21.0766	-18.4341
37.9701	113.508	-22.5404	-19.5938
37.9701	113.508	-22.8101	-18.8603
37.9701	113.508	-23.0735	-18.1268
37.9701	113.508	-21.2884	-16.4821
37.9701	113.508	-19.7426	-16.0777
37.9701	113.508	-18.143	-15.2785
37.9701	113.508	-17.8173	-14.6933
37.9701	113.509	-17.6245	-13.6739
37.9701	113.509	-16.2083	-11.2265
37.97	113.498	0.648254	-0.836886
37.97	113.499	-5.32877	-6.15657
37.97	113.499	-11.8429	-12.1339
37.97	113.499	-13.7171	-14.617
37.97	113.499	-17.0411	-18.1884
37.97	113.499	-20.5108	-21.5491
37.97	113.499	-23.0803	-23.8977
37.97	113.499	-25.5207	-25.9192
37.97	113.499	-27.4096	-27.7871
37.97	113.5	-29.0306	-29.6551
37.97	113.5	-30.7194	-31.4783
37.97	113.5	-30.9373	-31.6147
37.97	113.5	-31.169	-31.7511
37.97	113.5	-29.9414	-30.423
37.97	113.5	-32.2966	-32.8436
37.97	113.5	-34.1571	-34.8412
37.97	113.5	-36.0765	-36.8738
37.97	113.501	-36.4873	-37.0284
37.97	113.501	-37.2186	-37.4179
37.97	113.501	-37.9499	-37.8074
37.97	113.501	-39.9839	-39.9765
37.97	113.501	-45.2849	-45.6305
37.97	113.501	-50.5737	-51.2845
37.97	113.501	-50.887	-51.4747
37.97	113.501	-49.8512	-50.2965
37.97	113.502	-48.7622	-49.1184
37.97	113.502	-48.4229	-48.6669
37.97	113.502	-46.3987	-46.8524
37.97	113.502	-43.9381	-44.8196
37.97	113.502	-43.4707	-44.7939
37.97	113.502	-44.4821	-46.1643
37.97	113.502	-45.4046	-47.7008
37.97	113.502	-45.5718	-48.193
37.97	113.503	-45.6343	-48.5611
37.97	113.503	-47.1784	-49.5835
37.97	113.503	-47.5203	-49.4454
37.97	113.503	-51.0768	-52.4903
37.97	113.503	-56.2252	-57.5384
37.97	113.503	-62.6452	-63.3266
37.97	113.503	-66.6796	-67.6
37.97	113.503	-67.7904	-69.2681
37.97	113.504	-68.8091	-70.9362
37.97	113.504	-66.1216	-67.3236
37.97	113.504	-63.465	-63.7109
37.97	113.504	-60.4908	-60.0982
37.97	113.504	-62.5613	-62.3554
37.97	113.504	-64.6271	-64.6916
37.97	113.504	-66.6896	-67.0278
37.97	113.504	-65.9942	-66.2209
37.97	113.505	-63.9626	-64.131
37.97	113.505	-61.8789	-62.0411
37.97	113.505	-59.7301	-59.9125
37.97	113.505	-58.5373	-58.7497
37.97	113.505	-56.6262	-57.5869
37.97	113.505	-54.2126	-55.1983
37.97	113.505	-52.183	-53.0479
37.97	113.505	-50.0977	-50.8976
37.97	113.506	-48.4932	-49.2716
37.97	113.506	-45.0353	-45.2623
37.97	113.506	-46.3798	-46.5903
37.97	113.506	-43.8777	-43.9998
37.97	113.506	-41.2893	-41.4092
37.97	113.506	-38.3979	-38.4484
37.97	113.506	-37.6536	-37.5684
37.97	113.507	-36.9074	-36.6885
37.97	113.507	-36.1663	-35.8086
37.97	113.507	-36.1663	-35.8086
37.97	113.507	-33.5657	-32.9846
37.97	113.507	-33.5657	-32.9846
37.97	113.507	-29.1272	-27.9261
37.97	113.507	-24.8037	-23.2013
37.97	113.508	-20.9356	-18.4764
37.97	113.508	-22.0009	-18.8742
37.97	113.508	-22.5451	-18.5575
37.97	113.508	-22.8749	-18.1478
37.97	113.508	-21.0802	-16.9734
37.97	113.508	-19.2683	-16.1919
37.97	113.508	-17.7811	-15.217
37.97	113.508	-17.7727	-14.7317
37.97	113.509	-17.6145	-13.6723
37.97	113.509	-16.1098	-11.2767
37.9699	113.499	-2.9353	-4.60218
37.9699	113.499	-8.88136	-10.3948
37.9699	113.499	-11.134	-12.9583
37.9699	113.499	-14.2056	-16.2193
37.9699	113.499	-18.1153	-19.6221
37.9699	113.499	-21.2603	-22.3196
37.9699	113.499	-23.7819	-24.5527
37.9699	113.499	-26.0739	-26.69
37.9699	113.5	-28.0498	-28.8272
37.9699	113.5	-30.0825	-30.97
37.9699	113.5	-29.731	-30.4517
37.9699	113.5	-29.0979	-29.7255
37.9699	113.5	-27.9018	-28.4279
37.9699	113.5	-28.6765	-29.3825
37.9699	113.5	-29.7501	-30.6843
37.9699	113.5	-31.1466	-32.3185
37.9699	113.501	-31.8966	-32.9389
37.9699	113.501	-32.4353	-32.9966
37.9699	113.501	-32.9742	-33.0543
37.9699	113.501	-37.1134	-37.2199
37.9699	113.501	-43.7702	-44.2591
37.9699	113.501	-50.4212	-51.2984
37.9699	113.501	-51.1762	-51.8968
37.9699	113.501	-49.5232	-50.0754
37.9699	113.502	-47.7912	-48.254
37.9699	113.502	-46.554	-47.1158
37.9699	113.502	-44.4951	-45.4193
37.9699	113.502	-41.6688	-43.3185
37.9699	113.502	-40.8174	-43.2304
37.9699	113.502	-40.9392	-43.6702
37.9699	113.502	-40.7913	-44.3866
37.9699	113.502	-40.0393	-43.8809
37.9699	113.503	-39.2906	-43.3752
37.9699	113.503	-40.6964	-43.9573
37.9699	113.503	-42.9963	-45.2238
37.9699	113.503	-47.6948	-49.1904
37.9699	113.503	-53.377	-55.0802
37.9699	113.503	-59.6799	-60.6635
37.9699	113.503	-62.9684	-64.1979
37.9699	113.503	-63.326	-65.2357
37.9699	113.504	-63.607	-66.2735
37.9699	113.504	-62.6409	-64.5547
37.9699	113.504	-61.0903	-62.1779
37.9699	113.504	-59.0833	-59.1219
37.9699	113.504	-61.4491	-61.294
37.9699	113.504	-64.9766	-65.1283
37.9699	113.504	-67.631	-68.0041
37.9699	113.504	-67.3186	-67.6781
37.9699	113.505	-64.5153	-64.8138
37.9699	113.505	-61.7939	-61.9494
37.9699	113.505	-58.9982	-59.0469
37.9699	113.505	-58.1143	-58.1003
37.9699	113.505	-57.2166	-57.1536
37.9699	113.505	-55.3339	-55.5979
37.9699	113.505	-53.7613	-54.31
37.9699	113.505	-52.4949	-53.0222
37.9699	113.506	-52.446	-52.9955
37.9699	113.506	-50.1756	-50.2052
37.9699	113.506	-49.58	-49.6299
37.9699	113.506	-46.2141	-46.1605
37.9699	113.506	-42.8338	-42.6911
37.9699	113.506	-39.4563	-39.2217
37.9699	113.506	-38.7725	-38.4917
37.9699	113.507	-38.088	-37.7617
37.9699	113.507	-37.3942	-37.0316
37.9699	113.507	-37.3942	-37.0316
37.9699	113.507	-34.5913	-33.9196
37.9699	113.507	-34.5913	-33.9196
37.9699	113.507	-30.7713	-29.6341
37.9699	113.507	-26.9538	-25.3487
37.9699	113.508	-23.09	-21.0632
37.9699	113.508	-22.7386	-20.0287
[truncated: 1,934 more rows]
