# Supplementary material for: Mine subsidence monitoring and prediction integrating SBAS-InSAR technology and BO-Prophet model
Source: PeerJ journal article supplement (doi:10.7717/peerj-cs.3327), 2025-10-28
Supplement: Figure122.xlsx [file Figure122.xlsx]

## Sheet: Sheet1
y	x	SBAS-InSAR	Prediction
37.9743	113.5	-24.6243	-25.9946
37.9743	113.5	-22.8394	-23.8886
37.9743	113.5	-28.377	-26.8417
37.9743	113.5	-28.6778	-29.6736
37.9743	113.501	-29.5702	-30.875
37.9741	113.5	-31.4966	-33.2606
37.9741	113.5	-35.3292	-37.0295
37.9741	113.5	-31.4209	-33.0348
37.9741	113.5	-27.6515	-29.0401
37.9741	113.5	-27.9219	-26.4426
37.9741	113.5	-27.7948	-29.2369
37.9741	113.5	-29.817	-31.3026
37.9741	113.501	-29.763	-31.4424
37.9741	113.501	-28.1663	-30.2676
37.9741	113.501	-27.4111	-29.9039
37.9741	113.501	-26.9758	-29.6069
37.9741	113.501	-26.2687	-28.7656
37.974	113.5	-28.9678	-30.7597
37.974	113.5	-32.4089	-34.1111
37.974	113.5	-35.8745	-37.4624
37.974	113.5	-33.251	-34.8409
37.974	113.5	-30.7042	-32.2194
37.974	113.5	-28.8093	-30.3329
37.974	113.5	-30.1711	-31.8029
37.974	113.5	-30.6405	-32.3191
37.974	113.501	-29.3887	-31.1199
37.974	113.501	-27.1525	-29.1497
37.974	113.501	-25.7906	-28.0972
37.974	113.501	-25.4606	-28.1125
37.974	113.501	-25.3497	-28.2511
37.974	113.501	-24.2264	-27.5168
37.974	113.501	-21.5274	-25.3294
37.974	113.501	-19.1209	-23.0548
37.974	113.502	-16.3398	-20.7221
37.9739	113.499	-25.85	-27.3259
37.9739	113.5	-28.1617	-29.8412
37.9739	113.5	-30.7228	-32.3566
37.9739	113.5	-33.4199	-34.8719
37.9739	113.5	-33.1143	-34.6418
37.9739	113.5	-32.8652	-34.4117
37.9739	113.5	-32.1892	-33.8256
37.9739	113.5	-31.3643	-33.1135
37.9739	113.5	-29.6513	-31.4818
37.9739	113.501	-27.6359	-29.4071
37.9739	113.501	-25.4051	-27.2616
37.9739	113.501	-24.5019	-25.7625
37.9739	113.501	-23.3023	-25.6717
37.9739	113.501	-23.7468	-26.6171
37.9739	113.501	-23.3638	-27.247
37.9739	113.501	-21.3128	-25.6947
37.9739	113.501	-19.1126	-23.533
37.9739	113.502	-16.5571	-21.3555
37.9739	113.502	-15.2751	-20.6601
37.9739	113.502	-13.977	-19.9646
37.9739	113.502	-13.6459	-20.1545
37.9738	113.499	-19.8097	-21.4379
37.9738	113.499	-24.687	-24.6325
37.9738	113.5	-24.3135	-25.8291
37.9738	113.5	-25.4674	-27.0257
37.9738	113.5	-26.9226	-28.4382
37.9738	113.5	-29.0557	-30.7595
37.9738	113.5	-30.8416	-32.6386
37.9738	113.5	-31.7325	-33.6015
37.9738	113.5	-29.2538	-31.2819
37.9738	113.5	-27.2334	-29.3263
37.9738	113.501	-25.506	-27.5811
37.9738	113.501	-24.2733	-26.2835
37.9738	113.501	-23.3841	-24.8029
37.9738	113.501	-22.2239	-24.5432
37.9738	113.501	-22.5057	-25.7439
37.9738	113.501	-22.5128	-26.8444
37.9738	113.501	-20.6537	-25.4904
37.9738	113.501	-18.5301	-23.4615
37.9738	113.502	-16.4035	-21.5926
37.9738	113.502	-15.5018	-21.326
37.9738	113.502	-14.4162	-20.6483
37.9738	113.502	-13.6981	-20.2971
37.9738	113.502	-12.9249	-18.8614
37.9738	113.502	-9.12275	-13.4228
37.9736	113.499	-12.2445	-12.8428
37.9736	113.499	-14.7769	-16.2271
37.9736	113.499	-18.247	-19.6114
37.9736	113.5	-20.5629	-20.2636
37.9736	113.5	-18.9615	-20.4317
37.9736	113.5	-20.2886	-21.624
37.9736	113.5	-23.77	-25.5758
37.9736	113.5	-26.8057	-28.8301
37.9736	113.5	-28.1069	-30.1606
37.9736	113.5	-25.6815	-27.8016
37.9736	113.5	-25.4421	-26.7098
37.9736	113.501	-24.7457	-26.4799
37.9736	113.501	-25.0192	-27.0329
37.9736	113.501	-24.4706	-26.9905
37.9736	113.501	-24.3953	-27.1339
37.9736	113.501	-23.6414	-27.3414
37.9736	113.501	-22.9755	-27.6374
37.9736	113.501	-21.0972	-26.2248
37.9736	113.501	-18.6004	-24.0732
37.9736	113.502	-16.0582	-21.9216
37.9736	113.502	-15.5455	-21.9569
37.9736	113.502	-14.4521	-20.8013
37.9736	113.502	-13.3037	-19.6458
37.9736	113.502	-12.2777	-17.9771
37.9736	113.502	-11.4108	-16.8658
37.9736	113.502	-8.95055	-12.6349
37.9736	113.503	-9.99769	-13.4908
37.9736	113.503	-12.1743	-15.7373
37.9735	113.499	-7.61297	-8.54962
37.9735	113.499	-11.0953	-11.7115
37.9735	113.499	-14.5829	-14.8734
37.9735	113.5	-15.176	-15.5935
37.9735	113.5	-14.3448	-14.8567
37.9735	113.5	-15.2654	-15.784
37.9735	113.5	-19.4899	-19.8253
37.9735	113.5	-22.7754	-23.1746
37.9735	113.5	-23.7959	-24.4605
37.9735	113.5	-22.6352	-23.8857
37.9735	113.5	-24.3262	-26.3454
37.9735	113.501	-26.5871	-29.2045
37.9735	113.501	-28.7428	-31.8582
37.9735	113.501	-28.7919	-32.3624
37.9735	113.501	-28.0979	-32.1273
37.9735	113.501	-26.3772	-30.6487
37.9735	113.501	-24.2504	-29.1701
37.9735	113.501	-22.2088	-27.4468
37.9735	113.502	-15.931	-22.3837
37.9735	113.502	-15.7783	-22.5399
37.9735	113.502	-14.8896	-21.183
37.9735	113.502	-13.4329	-19.2854
37.9735	113.502	-12.3746	-17.502
37.9735	113.502	-13.0832	-17.8688
37.9735	113.502	-14.4975	-17.4845
37.9735	113.503	-14.5923	-17.2692
37.9735	113.503	-16.8021	-19.1781
37.9735	113.503	-15.9759	-18.6894
37.9735	113.503	-15.1405	-18.2006
37.9735	113.503	-13.8547	-17.0642
37.9734	113.499	-5.22102	-6.49513
37.9734	113.499	-5.79917	-7.25929
37.9734	113.499	-8.09479	-9.4639
37.9734	113.499	-10.4054	-11.6685
37.9734	113.5	-11.0346	-12.4291
37.9734	113.5	-9.65255	-11.1579
37.9734	113.5	-10.3472	-11.8065
37.9734	113.5	-14.0464	-15.186
37.9734	113.5	-17.6073	-18.6505
37.9734	113.5	-18.5355	-19.8203
37.9734	113.5	-19.5247	-21.4964
37.9734	113.5	-23.9612	-26.7571
37.9734	113.501	-29.1012	-32.3927
37.9734	113.501	-32.4214	-36.2569
37.9734	113.501	-32.712	-36.9115
37.9734	113.501	-31.7089	-36.3612
37.9734	113.501	-29.0722	-33.9134
37.9734	113.501	-26.2736	-31.4656
37.9734	113.501	-25.3912	-30.8843
37.9734	113.502	-18.3719	-25.021
37.9734	113.502	-16.5164	-23.1798
37.9734	113.502	-16.1873	-22.3241
37.9734	113.502	-14.7194	-20.3851
37.9734	113.502	-14.0044	-18.865
37.9734	113.502	-15.0248	-19.3351
37.9734	113.502	-16.569	-20.4428
37.9734	113.502	-19.3622	-22.3811
37.9734	113.503	-20.8971	-23.3847
37.9734	113.503	-22.5405	-25.3729
37.9734	113.503	-21.4966	-24.3788
37.9734	113.503	-19.6467	-22.4076
37.9734	113.503	-17.28	-20.3078
37.9734	113.503	-16.3809	-19.4234
37.9734	113.503	-15.6946	-18.7009
37.9734	113.503	-13.479	-16.9239
37.9734	113.504	-10.1723	-13.7908
37.9733	113.499	-5.77706	-7.22946
37.9733	113.499	-6.23296	-7.86459
37.9733	113.499	-7.07122	-8.78902
37.9733	113.499	-7.89972	-9.71345
37.9733	113.5	-8.39014	-10.3731
37.9733	113.5	-7.70367	-9.77584
37.9733	113.5	-8.69217	-10.7481
37.9733	113.5	-11.7533	-13.5547
37.9733	113.5	-15.0989	-16.7916
37.9733	113.5	-16.6135	-18.5571
37.9733	113.5	-19.3188	-21.9766
37.9733	113.5	-25.8243	-29.3052
37.9733	113.501	-32.5954	-36.5359
37.9733	113.501	-35.3479	-39.8198
37.9733	113.501	-34.2867	-39.0965
37.9733	113.501	-32.189	-37.4148
37.9733	113.501	-29.9982	-35.4116
37.9733	113.501	-27.8328	-33.4085
37.9733	113.501	-27.1679	-32.9863
37.9733	113.501	-25.4945	-31.5587
37.9733	113.502	-18.4922	-24.7367
37.9733	113.502	-19.1358	-25.1307
37.9733	113.502	-20.2714	-26.0729
37.9733	113.502	-19.597	-23.8376
37.9733	113.502	-20.45	-24.1949
37.9733	113.502	-23.42	-26.6781
37.9733	113.503	-26.5428	-29.269
37.9733	113.503	-27.8232	-30.8389
37.9733	113.503	-27.7115	-30.6546
37.9733	113.503	-24.6044	-27.5391
37.9733	113.503	-21.2884	-24.352
37.9733	113.503	-18.3467	-21.5752
37.9733	113.503	-16.7011	-19.8953
37.9733	113.503	-14.6498	-17.9666
37.9733	113.504	-11.5109	-14.4808
37.9733	113.504	-8.72061	-11.4884
37.9733	113.504	-6.24033	-8.80561
37.9733	113.504	-5.77703	-8.92015
37.9733	113.504	-5.71205	-9.40515
37.9731	113.499	-5.96723	-7.5925
37.9731	113.499	-6.71734	-8.06487
37.9731	113.499	-7.47972	-8.53723
37.9731	113.499	-7.13218	-8.44308
37.9731	113.499	-6.77359	-8.34893
37.9731	113.5	-6.62723	-8.52152
37.9731	113.5	-7.03133	-9.12794
37.9731	113.5	-8.88737	-11.1085
37.9731	113.5	-11.9828	-14.1966
37.9731	113.5	-15.1834	-17.4097
37.9731	113.5	-17.2171	-19.7135
37.9731	113.5	-21.0359	-24.1131
37.9731	113.5	-27.814	-31.518
37.9731	113.501	-34.3551	-38.458
37.9731	113.501	-35.74	-40.5561
37.9731	113.501	-33.7793	-39.1842
37.9731	113.501	-31.4695	-37.4974
37.9731	113.501	-30.238	-36.2347
37.9731	113.501	-29.1544	-35.1545
37.9731	113.501	-28.5831	-34.6659
37.9731	113.501	-29.294	-35.4374
37.9731	113.502	-24.0051	-30.0079
37.9731	113.502	-23.4807	-29.4206
37.9731	113.502	-26.9525	-32.8845
37.9731	113.502	-25.3181	-30.6613
37.9731	113.502	-24.5922	-28.9243
37.9731	113.502	-23.5052	-27.1546
37.9731	113.502	-25.933	-29.4391
37.9731	113.503	-28.5826	-32.0027
37.9731	113.503	-30.2655	-33.5085
37.9731	113.503	-31.3294	-34.4295
37.9731	113.503	-28.3947	-31.4317
37.9731	113.503	-25.1107	-28.221
37.9731	113.503	-21.4379	-24.7772
37.9731	113.503	-18.9816	-22.1703
37.9731	113.503	-16.8287	-19.7642
37.9731	113.504	-13.4071	-15.803
37.9731	113.504	-10.7291	-12.8276
37.9731	113.504	-7.89928	-9.95685
37.9731	113.504	-7.00535	-10.0132
37.9731	113.504	-6.91054	-10.8717
37.9731	113.504	-7.59487	-12.3217
37.9731	113.504	-10.7236	-15.7693
37.9731	113.504	-13.8692	-19.2169
37.9731	113.505	-15.339	-20.8192
37.973	113.499	-4.69502	-5.83197
37.973	113.499	-5.74926	-6.33123
37.973	113.499	-6.79474	-6.8305
37.973	113.499	-6.29431	-6.85334
37.973	113.499	-5.33818	-6.32509
37.973	113.5	-5.49688	-6.97369
37.973	113.5	-7.53286	-9.14528
37.973	113.5	-10.8549	-12.7306
37.973	113.5	-14.4315	-16.5528
37.973	113.5	-17.7098	-20.1381
37.973	113.5	-20.3296	-23.0676
37.973	113.5	-24.4594	-27.72
37.973	113.5	-30.8666	-34.751
37.973	113.501	-36.634	-41.0241
37.973	113.501	-37.3627	-42.6988
37.973	113.501	-35.1393	-41.237
37.973	113.501	-32.8578	-39.7752
37.973	113.501	-31.8238	-38.545
37.973	113.501	-30.877	-37.3158
37.973	113.501	-29.8234	-36.0866
37.973	113.501	-30.594	-36.9082
37.973	113.502	-28.7259	-34.9996
37.973	113.502	-28.1721	-34.0574
37.973	113.502	-30.5885	-36.441
37.973	113.502	-29.524	-35.0426
37.973	113.502	-26.7287	-30.6972
37.973	113.502	-27.6631	-31.4495
37.973	113.503	-29.3342	-33.1041
37.973	113.503	-30.9002	-34.1106
37.973	113.503	-31.9726	-35.1171
37.973	113.503	-29.9961	-32.9706
37.973	113.503	-27.5493	-30.376
37.973	113.503	-23.9948	-27.2896
37.973	113.503	-21.1841	-24.2847
37.973	113.503	-18.994	-21.6918
37.973	113.504	-16.0414	-18.2056
37.973	113.504	-13.6217	-15.6864
37.973	113.504	-11.1055	-13.1594
37.973	113.504	-10.0811	-13.058
37.973	113.504	-10.1696	-14.0907
37.973	113.504	-10.6551	-15.4406
37.973	113.504	-13.1349	-18.2215
37.973	113.504	-15.6256	-21.0025
37.973	113.505	-17.8637	-23.474
37.973	113.505	-14.8535	-20.5287
37.973	113.505	-11.0374	-16.6654
37.973	113.505	-7.28165	-12.8021
37.973	113.505	-8.24101	-13.5418
37.9729	113.499	-2.07693	-1.8084
37.9729	113.499	-3.71295	-3.26527
37.9729	113.499	-5.31509	-4.72214
37.9729	113.499	-5.54896	-5.77443
37.9729	113.499	-4.67868	-5.41858
37.9729	113.5	-5.17023	-6.42639
37.9729	113.5	-8.06471	-9.2623
37.9729	113.5	-12.3348	-13.7214
37.9729	113.5	-16.5507	-18.35
37.9729	113.5	-20.1075	-22.4999
37.9729	113.5	-23.3437	-26.1999
37.9729	113.5	-27.7608	-31.2163
37.9729	113.5	-33.7881	-37.9991
37.9729	113.501	-38.8789	-43.6985
37.9729	113.501	-39.424	-45.2877
37.9729	113.501	-37.1732	-43.8877
37.9729	113.501	-34.8374	-42.4877
37.9729	113.501	-33.7349	-41.3371
37.9729	113.501	-31.778	-38.3814
37.9729	113.501	-32.4372	-38.8615
37.9729	113.502	-34.2199	-40.6987
37.9729	113.502	-33.6059	-39.4948
37.9729	113.502	-32.0416	-37.7431
37.9729	113.502	-31.9633	-37.5181
37.9729	113.502	-31.3119	-36.4912
37.9729	113.502	-28.7753	-32.8461
37.9729	113.503	-29.4208	-33.5654
37.9729	113.503	-30.9218	-34.3447
37.9729	113.503	-31.2421	-34.4554
37.9729	113.503	-30.3304	-33.1815
37.9729	113.503	-29.5501	-32.0427
37.9729	113.503	-28.1638	-31.3019
37.9729	113.503	-26.4794	-29.6404
37.9729	113.503	-23.6137	-26.439
37.9729	113.504	-19.6723	-22.1042
37.9729	113.504	-16.4059	-18.7553
37.9729	113.504	-14.4166	-16.7633
37.9729	113.504	-13.8373	-16.9642
37.9729	113.504	-14.2385	-18.1611
37.9729	113.504	-14.6655	-19.358
37.9729	113.504	-16.0419	-21.0468
37.9729	113.504	-17.4838	-22.7356
37.9729	113.505	-18.8802	-24.4244
37.9729	113.505	-16.4961	-21.9915
37.9729	113.505	-9.484	-14.672
37.9729	113.505	-9.59689	-14.6605
37.9729	113.505	-8.11957	-12.5994
37.9729	113.505	-6.62802	-10.5382
37.9729	113.505	-5.13705	-8.48167
37.9729	113.506	-5.16903	-8.24362
37.9728	113.499	-0.471302	0.307602
37.9728	113.499	-0.345577	1.28087
37.9728	113.499	-2.43263	-1.36104
37.9728	113.499	-4.49233	-4.00295
37.9728	113.499	-5.60958	-6.2611
37.9728	113.499	-4.93985	-6.09967
37.9728	113.5	-5.87221	-7.36099
37.9728	113.5	-8.9141	-10.0534
37.9728	113.5	-13.6577	-14.7197
37.9728	113.5	-17.9967	-19.4542
37.9728	113.5	-21.9737	-24.3658
37.9728	113.5	-25.7528	-28.9117
37.9728	113.5	-30.279	-34.212
37.9728	113.5	-35.2347	-40.0532
37.9728	113.501	-38.9005	-44.3669
37.9728	113.501	-38.5416	-45.0421
37.9728	113.501	-36.5464	-43.8995
37.9728	113.501	-34.5867	-42.7569
37.9728	113.501	-34.2928	-42.6937
37.9728	113.501	-33.4297	-41.2584
37.9728	113.501	-34.2128	-41.2672
37.9728	113.501	-35.2762	-41.8062
37.9728	113.502	-37.9507	-44.448
37.9728	113.502	-38.8722	-45.0947
37.9728	113.502	-33.5425	-38.991
37.9728	113.502	-31.6721	-37.0096
37.9728	113.502	-31.3345	-36.548
37.9728	113.502	-30.3817	-34.7689
37.9728	113.503	-31.0037	-35.3248
37.9728	113.503	-32.4517	-36.2781
37.9728	113.503	-32.1661	-35.5317
37.9728	113.503	-31.4802	-34.3882
37.9728	113.503	-32.1157	-34.3504
37.9728	113.503	-33.0065	-35.9903
37.9728	113.503	-32.2935	-35.6125
37.9728	113.503	-28.3565	-31.5312
37.9728	113.504	-22.954	-25.785
37.9728	113.504	-19.1917	-21.844
37.9728	113.504	-17.6799	-20.2635
37.9728	113.504	-17.5761	-20.6177
37.9728	113.504	-17.9591	-21.6569
37.9728	113.504	-18.4957	-22.8973
37.9728	113.504	-18.8917	-23.5897
37.9728	113.504	-19.2676	-24.2065
37.9728	113.505	-19.6506	-24.8233
37.9728	113.505	-17.9537	-23.0407
37.9728	113.505	-14.7885	-19.7965
37.9728	113.505	-11.6318	-16.5523
37.9728	113.505	-10.9391	-15.6225
37.9728	113.505	-9.56552	-13.7057
37.9728	113.505	-8.2454	-11.7889
37.9728	113.505	-7.26472	-10.5295
37.9728	113.506	-7.17361	-10.3549
37.9728	113.506	-7.08785	-10.1804
37.9728	113.506	-7.41701	-10.4309
37.9728	113.506	-8.88735	-12.0822
37.9726	113.499	-0.465948	1.12931
37.9726	113.499	-1.494	0.348487
37.9726	113.499	-3.26875	-2.5087
37.9726	113.499	-5.02463	-5.36589
37.9726	113.499	-6.2256	-7.77811
37.9726	113.499	-6.02605	-7.86429
37.9726	113.5	-7.02771	-8.87286
37.9726	113.5	-10.1178	-11.2901
37.9726	113.5	-14.6953	-15.5967
37.9726	113.5	-19.1722	-20.4481
37.9726	113.5	-23.2866	-25.8424
37.9726	113.5	-27.6411	-31.425
37.9726	113.5	-32.0504	-36.836
37.9726	113.5	-35.1267	-40.9166
37.9726	113.501	-36.5565	-42.9394
37.9726	113.501	-35.3021	-42.5276
37.9726	113.501	-34.2454	-42.029
37.9726	113.501	-33.1115	-41.4689
37.9726	113.501	-33.2987	-41.9085
37.9726	113.501	-32.8511	-41.1813
37.9726	113.501	-38.0629	-44.7612
37.9726	113.502	-41.184	-47.5335
37.9726	113.502	-42.8784	-48.8885
37.9726	113.502	-40.7901	-46.4323
37.9726	113.502	-35.4049	-40.6301
37.9726	113.502	-31.146	-36.2659
37.9726	113.502	-30.7184	-35.656
37.9726	113.502	-30.1937	-34.9898
37.9726	113.503	-33.5473	-37.7709
37.9726	113.503	-34.6067	-38.6492
37.9726	113.503	-34.5141	-37.6902
37.9726	113.503	-34.1548	-36.5454
37.9726	113.503	-35.0544	-37.1415
37.9726	113.503	-37.0551	-39.9152
37.9726	113.503	-37.5852	-41.2648
37.9726	113.503	-33.6053	-37.0948
37.9726	113.504	-27.4087	-30.5638
37.9726	113.504	-22.3746	-25.1454
37.9726	113.504	-20.5922	-23.0729
37.9726	113.504	-20.3949	-23.0869
37.9726	113.504	-20.5667	-23.8395
37.9726	113.504	-21.0597	-25.0131
37.9726	113.504	-20.8248	-25.0345
37.9726	113.504	-20.6005	-24.8144
37.9726	113.505	-20.3728	-24.5942
37.9726	113.505	-18.2092	-22.5258
37.9726	113.505	-15.8638	-20.2885
37.9726	113.505	-13.5094	-18.0511
37.9726	113.505	-12.537	-16.7198
37.9726	113.505	-11.2178	-14.8758
37.9726	113.505	-9.91495	-13.0318
37.9726	113.505	-9.537	-12.6734
37.9726	113.506	-9.55445	-12.7937
37.9726	113.506	-9.55539	-12.914
37.9726	113.506	-9.7833	-13.2879
37.9726	113.506	-10.7919	-14.589
37.9726	113.506	-11.7387	-15.602
37.9726	113.506	-14.8379	-18.4616
37.9725	113.499	-1.66113	-0.723708
37.9725	113.499	-3.12968	-1.95169
37.9725	113.499	-4.15987	-4.09725
37.9725	113.499	-5.19517	-6.24281
37.9725	113.499	-6.44046	-8.57085
37.9725	113.499	-6.84844	-8.93581
37.9725	113.5	-8.53074	-10.2644
37.9725	113.5	-11.6475	-12.6505
37.9725	113.5	-16.1653	-17.1261
37.9725	113.5	-20.3925	-22.0179
37.9725	113.5	-24.7083	-27.8515
37.9725	113.5	-29.0074	-33.5949
37.9725	113.5	-32.7056	-38.3843
37.9725	113.5	-33.913	-40.637
37.9725	113.501	-33.4436	-40.7078
37.9725	113.501	-31.8598	-39.7503
37.9725	113.501	-31.892	-40.0249
37.9725	113.501	-31.872	-40.3422
37.9725	113.501	-32.6406	-41.3376
37.9725	113.501	-32.3741	-41.061
37.9725	113.501	-34.9627	-42.9602
37.9725	113.501	-39.706	-46.5174
37.9725	113.502	-43.6215	-49.5825
37.9725	113.502	-44.7833	-50.527
37.9725	113.502	-44.0137	-49.4798
37.9725	113.502	-33.2005	-38.0071
37.9725	113.502	-31.0274	-35.807
37.9725	113.502	-32.172	-36.9591
37.9725	113.503	-35.9698	-40.0636
37.9725	113.503	-35.7934	-39.7586
37.9725	113.503	-35.9513	-39.1931
37.9725	113.503	-36.1214	-38.6276
37.9725	113.503	-37.2437	-39.2198
37.9725	113.503	-38.5946	-41.3537
37.9725	113.503	-38.75	-42.1307
37.9725	113.503	-35.3855	-38.9086
37.9725	113.504	-30.3552	-33.5724
37.9725	113.504	-26.2648	-28.9921
37.9725	113.504	-24.2746	-26.496
37.9725	113.504	-23.2643	-25.4119
37.9725	113.504	-22.3487	-24.9626
37.9725	113.504	-22.0012	-25.2705
37.9725	113.504	-21.5679	-24.9658
37.9725	113.504	-21.4	-24.6273
37.9725	113.505	-21.251	-24.2887
37.9725	113.505	-19.5085	-22.7862
37.9725	113.505	-17.7553	-21.2837
37.9725	113.505	-15.9928	-19.7812
37.9725	113.505	-14.7075	-18.1669
37.9725	113.505	-13.2202	-16.3396
37.9725	113.505	-11.8151	-14.6335
37.9725	113.505	-11.8726	-14.9215
37.9725	113.506	-12.1185	-15.3548
37.9725	113.506	-12.6173	-16.1039
37.9725	113.506	-13.1441	-16.9556
37.9725	113.506	-14.087	-18.3838
37.9725	113.506	-14.0608	-18.2964
37.9725	113.506	-15.082	-18.5405
37.9725	113.506	-15.7206	-18.2755
37.9725	113.506	-18.0176	-20.5635
37.9724	113.499	-0.0628402	0.0292581
37.9724	113.499	-1.79789	-1.50125
37.9724	113.499	-3.53304	-3.03175
37.9724	113.499	-4.33006	-4.89091
37.9724	113.499	-5.12682	-6.75008
37.9724	113.499	-6.63166	-9.0765
37.9724	113.499	-8.03217	-10.011
37.9724	113.5	-10.5337	-11.9685
37.9724	113.5	-13.7681	-14.7583
37.9724	113.5	-17.6395	-19.0442
37.9724	113.5	-21.9767	-24.2765
37.9724	113.5	-26.2341	-30.0231
37.9724	113.5	-30.3633	-35.6199
37.9724	113.5	-32.9748	-39.2473
37.9724	113.5	-33.0905	-40.4237
37.9724	113.501	-31.8892	-39.7865
37.9724	113.501	-30.622	-39.1492
37.9724	113.501	-30.9693	-39.5211
37.9724	113.501	-32.9623	-41.5821
37.9724	113.501	-32.9337	-41.4922
37.9724	113.501	-34.162	-42.3835
37.9724	113.502	-44.9775	-50.6237
37.9724	113.502	-45.9627	-51.3839
37.9724	113.502	-46.7449	-51.9143
37.9724	113.502	-42.204	-47.079
37.9724	113.502	-36.7118	-41.3231
37.9724	113.502	-32.6735	-37.4235
37.9724	113.502	-34.3674	-39.2117
37.9724	113.502	-35.2991	-39.7139
37.9724	113.503	-36.1593	-40.1599
37.9724	113.503	-35.9452	-39.5568
37.9724	113.503	-36.426	-39.5353
37.9724	113.503	-36.7032	-39.2327
37.9724	113.503	-37.2917	-39.3299
37.9724	113.503	-36.918	-39.8094
37.9724	113.503	-37.7499	-40.9431
37.9724	113.503	-36.6914	-40.0352
37.9724	113.504	-34.5507	-37.7732
37.9724	113.504	-31.3999	-34.1796
37.9724	113.504	-28.7266	-31.2192
37.9724	113.504	-26.7155	-28.579
37.9724	113.504	-24.3066	-26.3244
37.9724	113.504	-22.6134	-25.0784
37.9724	113.504	-22.0982	-24.7322
37.9724	113.504	-22.4159	-25.0091
37.9724	113.505	-22.7255	-25.2859
37.9724	113.505	-21.4481	-24.1812
37.9724	113.505	-20.1558	-23.0765
37.9724	113.505	-18.8724	-21.9718
37.9724	113.505	-17.0231	-20.0748
37.9724	113.505	-15.1871	-18.1778
37.9724	113.505	-13.5549	-16.472
37.9724	113.505	-13.9992	-17.005
37.9724	113.506	-14.3758	-17.538
37.9724	113.506	-15.7126	-19.1912
37.9724	113.506	-16.9553	-20.8642
37.9724	113.506	-18.1915	-22.5371
37.9724	113.506	-16.5145	-20.2392
37.9724	113.506	-15.4249	-17.8821
37.9724	113.506	-14.3386	-15.5249
37.9724	113.506	-16.1884	-17.145
37.9722	113.499	0.444017	-0.156614
37.9722	113.499	-0.9114	-1.23112
37.9722	113.499	-2.24987	-2.30563
37.9722	113.499	-3.4026	-4.5199
37.9722	113.499	-4.55971	-6.73417
37.9722	113.499	-7.04066	-9.83028
37.9722	113.499	-9.68531	-11.594
37.9722	113.5	-13.2121	-14.5258
37.9722	113.5	-16.3195	-17.7439
37.9722	113.5	-19.9371	-22.4217
37.9722	113.5	-24.3719	-27.846
37.9722	113.5	-28.8189	-33.3568
37.9722	113.5	-32.1875	-37.7809
37.9722	113.5	-33.9941	-40.2902
37.9722	113.5	-33.578	-40.9478
37.9722	113.501	-32.7815	-40.7867
37.9722	113.501	-31.9366	-40.6257
37.9722	113.501	-33.7347	-42.0395
37.9722	113.501	-35.3538	-43.5428
37.9722	113.501	-34.4338	-42.8157
37.9722	113.501	-34.4338	-42.8157
37.9722	113.502	-45.4721	-50.3884
37.9722	113.502	-45.6176	-50.3465
37.9722	113.502	-43.5211	-48.1488
37.9722	113.502	-35.3827	-39.8554
37.9722	113.502	-36.6761	-41.1051
37.9722	113.502	-36.6555	-40.8794
37.9722	113.503	-36.4616	-40.2973
37.9722	113.503	-35.8486	-39.2681
37.9722	113.503	-36.307	-39.3724
37.9722	113.503	-35.9477	-38.596
37.9722	113.503	-35.5988	-37.8195
37.9722	113.503	-35.0682	-37.4877
37.9722	113.503	-36.1702	-39.0347
37.9722	113.503	-36.7474	-39.8601
37.9722	113.504	-36.441	-39.6551
37.9722	113.504	-34.7325	-37.639
37.9722	113.504	-32.9894	-35.4187
37.9722	113.504	-29.7885	-32.012
37.9722	113.504	-26.1532	-27.9758
37.9722	113.504	-22.9278	-24.8653
37.9722	113.504	-22.4034	-24.7608
37.9722	113.504	-23.5501	-26.2116
37.9722	113.505	-24.6904	-27.6623
37.9722	113.505	-23.6489	-26.5298
37.9722	113.505	-22.5446	-25.3972
37.9722	113.505	-21.4407	-24.2647
37.9722	113.505	-19.129	-22.0509
37.9722	113.505	-16.8072	-19.8372
37.9722	113.505	-14.8552	-17.9043
37.9722	113.505	-15.3596	-18.3564
37.9722	113.506	-15.8362	-18.8085
37.9722	113.506	-18.5147	-21.8451
37.9722	113.506	-21.0523	-24.8309
37.9722	113.506	-23.6328	-27.8168
37.9722	113.506	-20.9499	-24.575
37.9722	113.506	-17.8687	-19.7988
37.9722	113.506	-14.8196	-15.0227
37.9722	113.506	-16.1283	-15.7031
37.9722	113.507	-16.534	-16.0045
37.9722	113.507	-22.2227	-24.369
37.9722	113.507	-21.8983	-24.2189
37.9721	113.499	0.66214	-0.586253
37.9721	113.499	-0.153476	-1.0654
37.9721	113.499	-0.962486	-1.54455
37.9721	113.499	-2.40874	-3.92083
37.9721	113.499	-3.8576	-6.29712
37.9721	113.499	-7.1621	-10.1155
37.9721	113.499	-10.8421	-12.9997
37.9721	113.5	-15.5524	-17.379
37.9721	113.5	-19.4257	-21.8115
37.9721	113.5	-22.9358	-26.4494
37.9721	113.5	-27.3163	-31.5895
37.9721	113.5	-31.3161	-36.2315
37.9721	113.5	-34.4714	-40.2229
37.9721	113.5	-35.977	-42.2171
37.9721	113.5	-35.316	-42.4246
37.9721	113.501	-35.0449	-42.7119
37.9721	113.501	-34.7238	-42.9993
37.9721	113.501	-37.1894	-44.9617
37.9721	113.501	-37.251	-45.0674
37.9721	113.501	-37.4895	-45.187
37.9721	113.501	-36.3615	-44.287
37.9721	113.501	-37.0477	-44.4293
37.9721	113.502	-42.5589	-46.6565
37.9721	113.502	-42.5589	-46.6565
37.9721	113.502	-42.5589	-46.6565
37.9721	113.502	-38.3463	-41.9118
37.9721	113.502	-38.3463	-41.9118
37.9721	113.502	-38.0311	-41.5824
37.9721	113.503	-35.876	-38.8739
37.9721	113.503	-36.001	-38.8242
37.9721	113.503	-35.1638	-37.7066
37.9721	113.503	-34.3122	-36.5891
37.9721	113.503	-34.0913	-36.3
37.9721	113.503	-35.6852	-38.232
37.9721	113.503	-36.818	-39.7802
37.9721	113.504	-36.8732	-40.0867
37.9721	113.504	-35.9326	-38.9516
37.9721	113.504	-35.0535	-37.79
37.9721	113.504	-32.4019	-34.6706
37.9721	113.504	-27.6786	-29.6631
37.9721	113.504	-23.1457	-25.066
37.9721	113.504	-22.8093	-25.1075
37.9721	113.504	-24.7712	-27.4476
37.9721	113.505	-26.919	-30.041
37.9721	113.505	-26.2339	-29.3134
37.9721	113.505	-25.4853	-28.5858
37.9721	113.505	-24.3313	-27.3867
37.9721	113.505	-22.7916	-25.9384
37.9721	113.505	-21.2578	-24.4901
37.9721	113.505	-18.7782	-21.8941
37.9721	113.505	-17.7352	-20.6427
37.9721	113.506	-16.6954	-19.3914
37.9721	113.506	-20.9956	-24.1682
37.9721	113.506	-25.2252	-28.8301
37.9721	113.506	-29.5055	-33.4921
37.9721	113.506	-27.0742	-30.592
37.9721	113.506	-16.8946	-16.7855
37.9721	113.506	-17.9876	-17.8891
37.9721	113.507	-18.8724	-19.8174
37.9721	113.507	-22.2704	-24.89
37.9721	113.507	-22.1696	-24.9414
37.9721	113.507	-22.0551	-24.8768
37.972	113.499	0.700693	-0.986232
37.972	113.499	0.134972	-1.30229
37.972	113.499	-0.434312	-1.61835
37.972	113.499	-1.84879	-3.63416
37.972	113.499	-3.22053	-5.64997
37.972	113.499	-6.77814	-9.68399
37.972	113.499	-11.051	-13.7204
37.972	113.5	-17.0133	-19.8097
37.972	113.5	-22.551	-25.9336
37.972	113.5	-27.2763	-31.4201
37.972	113.5	-31.4926	-35.9736
37.972	113.5	-34.5765	-39.3145
37.972	113.5	-36.9359	-42.3957
37.972	113.5	-38.2682	-44.357
37.972	113.5	-38.3394	-45.1447
37.972	113.501	-39.6093	-47.0689
37.972	113.501	-41.2418	-48.4798
37.972	113.501	-40.362	-47.7698
37.972	113.501	-39.4905	-46.6647
37.972	113.501	-37.9955	-45.0691
37.972	113.501	-38.7812	-45.1249
37.972	113.501	-39.012	-45.1416
37.972	113.502	-39.1059	-43.0755
37.972	113.502	-39.1303	-43.1611
37.972	113.502	-39.1836	-43.4249
37.972	113.502	-39.0762	-42.1491
37.972	113.502	-39.0274	-41.8171
37.972	113.502	-38.6636	-41.6505
37.972	113.503	-36.2938	-38.7634
37.972	113.503	-36.1908	-38.3955
37.972	113.503	-35.7129	-37.8063
37.972	113.503	-35.197	-37.2172
37.972	113.503	-35.0272	-37.0658
37.972	113.503	-35.3336	-37.9413
37.972	113.503	-35.5047	-38.5103
37.972	113.504	-35.1225	-38.3475
37.972	113.504	-34.9203	-38.1075
37.972	113.504	-35.5043	-38.5348
37.972	113.504	-34.1479	-36.7174
37.972	113.504	-29.8534	-32.0007
37.972	113.504	-25.0345	-26.9233
37.972	113.504	-24.5806	-26.3507
37.972	113.504	-26.4611	-28.3169
37.972	113.505	-28.6866	-30.9792
37.972	113.505	-28.7577	-31.515
37.972	113.505	-28.8367	-32.0508
37.972	113.505	-27.8563	-31.2354
37.972	113.505	-26.6032	-30.0139
37.972	113.505	-25.3887	-28.7923
37.972	113.505	-22.3248	-25.4152
37.972	113.505	-19.961	-22.6495
37.972	113.506	-17.678	-19.8839
37.972	113.506	-22.9456	-25.799
37.972	113.506	-28.0975	-31.44
37.972	113.506	-33.3036	-37.081
37.972	113.506	-32.9905	-36.6497
37.972	113.506	-21.4395	-22.7805
37.972	113.506	-19.6063	-21.0089
37.972	113.507	-20.599	-23.5417
37.972	113.507	-20.8965	-24.3015
37.972	113.507	-23.0712	-25.9786
37.972	113.507	-22.9559	-25.9608
37.972	113.507	-22.6955	-25.9886
37.9719	113.499	0.851378	-1.11279
37.9719	113.499	0.0866079	-1.83739
37.9719	113.499	-0.671043	-2.56199
37.9719	113.499	-1.81865	-3.99661
37.9719	113.499	-3.62052	-6.1434
37.9719	113.499	-7.07782	-10.06
37.9719	113.499	-12.083	-15.355
37.9719	113.5	-18.3782	-22.0283
37.9719	113.5	-25.1535	-29.0876
37.9719	113.5	-30.3294	-34.4482
37.9719	113.5	-34.5336	-38.6834
37.9719	113.5	-37.0415	-41.2708
37.9719	113.5	-39.088	-44.0435
37.9719	113.5	-39.9999	-45.8512
37.9719	113.5	-40.716	-47.4217
37.9719	113.501	-42.5639	-49.332
37.9719	113.501	-44.2739	-51.2423
37.9719	113.501	-45.1368	-52.2287
37.9719	113.501	-44.5968	-51.8245
37.9719	113.501	-40.6397	-46.9502
37.9719	113.501	-40.1991	-45.9171
37.9719	113.501	-41.2844	-47.0785
37.9719	113.502	-38.919	-43.4884
37.9719	113.502	-37.7798	-42.0553
37.9719	113.502	-38.2245	-42.8255
37.9719	113.502	-38.7759	-42.7346
37.9719	113.502	-39.0028	-42.3102
37.9719	113.502	-38.8575	-41.57
37.9719	113.502	-38.238	-41.3302
37.9719	113.503	-37.6203	-40.3494
37.9719	113.503	-36.9947	-39.3686
37.9719	113.503	-36.9018	-38.8347
37.9719	113.503	-36.689	-38.6892
37.9719	113.503	-36.5692	-38.5438
37.9719	113.503	-36.276	-38.5046
37.9719	113.503	-35.6298	-38.7171
37.9719	113.503	-35.4564	-38.6967
37.9719	113.504	-34.5527	-37.9964
37.9719	113.504	-34.7218	-38.1448
37.9719	113.504	-36.2563	-39.481
37.9719	113.504	-36.2767	-38.9265
37.9719	113.504	-33.0214	-34.9525
37.9719	113.504	-28.7465	-30.0235
37.9719	113.504	-27.7104	-28.4904
37.9719	113.504	-28.7644	-29.4217
37.9719	113.505	-30.2633	-31.2646
37.9719	113.505	-30.8399	-32.76
37.9719	113.505	-31.6112	-34.2553
37.9719	113.505	-30.9641	-33.9886
37.9719	113.505	-30.4499	-33.501
37.9719	113.505	-29.9658	-33.0134
37.9719	113.505	-26.5561	-29.1911
37.9719	113.505	-22.864	-25.006
37.9719	113.506	-19.2492	-20.8209
37.9719	113.506	-23.274	-25.5064
37.9719	113.506	-28.827	-31.7612
37.9719	113.506	-34.4564	-38.016
37.9719	113.506	-33.59	-36.9846
37.9719	113.506	-30.6923	-33.431
37.9719	113.506	-20.8893	-24.235
37.9719	113.507	-21.5895	-25.8865
37.9719	113.507	-21.607	-25.7722
37.9719	113.507	-23.1249	-26.1003
37.9719	113.507	-23.1125	-26.4608
37.9719	113.507	-22.55	-26.3692
37.9719	113.507	-21.9124	-26.2776
37.9719	113.507	-21.4653	-26.209
37.9717	113.499	1.69754	-0.472699
37.9717	113.499	0.792244	-1.52378
37.9717	113.499	-0.09683	-2.57487
37.9717	113.499	-0.994608	-3.62595
37.9717	113.499	-2.01318	-4.75269
37.9717	113.499	-3.70172	-6.5916
37.9717	113.499	-8.28115	-11.544
37.9717	113.499	-14.2645	-17.8775
37.9717	113.5	-21.3736	-25.2727
37.9717	113.5	-27.1528	-31.0258
37.9717	113.5	-32.6251	-36.5842
37.9717	113.5	-36.7934	-40.761
37.9717	113.5	-39.6966	-43.6274
37.9717	113.5	-40.8229	-45.5482
37.9717	113.5	-41.2722	-47.0767
37.9717	113.5	-41.6571	-48.5647
37.9717	113.501	-43.9176	-50.796
37.9717	113.501	-46.0066	-53.0108
37.9717	113.501	-47.8986	-55.0724
37.9717	113.501	-48.1264	-55.3514
37.9717	113.501	-45.8327	-52.5659
37.9717	113.501	-43.6729	-49.7884
37.9717	113.501	-41.9984	-47.6838
37.9717	113.501	-43.3684	-49.334
37.9717	113.502	-42.6382	-48.3409
37.9717	113.502	-38.2266	-42.8853
37.9717	113.502	-38.4478	-43.3036
37.9717	113.502	-38.3751	-42.7783
37.9717	113.502	-37.835	-41.1687
37.9717	113.502	-37.5399	-41.0223
37.9717	113.503	-37.5491	-40.6711
37.9717	113.503	-37.54	-40.3199
37.9717	113.503	-37.6716	-40.022
37.9717	113.503	-36.9921	-39.3662
37.9717	113.503	-36.3072	-38.7105
37.9717	113.503	-35.9626	-38.747
37.9717	113.503	-36.6653	-40.1313
37.9717	113.503	-36.8963	-40.7906
37.9717	113.504	-36.2088	-40.0785
37.9717	113.504	-36.0187	-39.511
37.9717	113.504	-37.2887	-40.5054
37.9717	113.504	-37.8464	-40.469
37.9717	113.504	-36.1451	-37.886
37.9717	113.504	-33.5465	-34.4662
37.9717	113.504	-31.6655	-32.3802
37.9717	113.504	-31.7115	-32.0041
37.9717	113.505	-31.751	-32.2743
37.9717	113.505	-32.4151	-33.5669
37.9717	113.505	-33.2043	-34.8596
37.9717	113.505	-32.9873	-34.9194
37.9717	113.505	-32.3262	-34.333
37.9717	113.505	-31.6861	-33.7465
37.9717	113.505	-28.4559	-30.3587
37.9717	113.505	-25.2413	-26.971
37.9717	113.506	-22.0626	-23.5832
37.9717	113.506	-23.9664	-25.866
37.9717	113.506	-33.3856	-36.8993
37.9717	113.506	-32.7519	-36.2262
37.9717	113.506	-32.6547	-36.1116
37.9717	113.506	-21.8866	-26.4535
37.9717	113.507	-21.8272	-26.2318
37.9717	113.507	-21.6211	-25.4925
37.9717	113.507	-21.8964	-25.4805
37.9717	113.507	-22.1695	-26.6133
37.9717	113.507	-21.8376	-26.6184
37.9717	113.507	-21.6978	-26.6005
37.9716	113.499	1.03314	-1.76878
37.9716	113.499	0.478296	-2.49264
37.9716	113.499	-0.082925	-3.21651
37.9716	113.499	-0.807472	-4.03586
37.9716	113.499	-1.93218	-5.13889
37.9716	113.499	-4.58273	-7.8291
37.9716	113.499	-9.53844	-13.0119
37.9716	113.499	-16.1332	-19.7422
37.9716	113.5	-22.8864	-26.4859
37.9716	113.5	-27.7087	-31.1658
37.9716	113.5	-33.3842	-37.1465
37.9716	113.5	-37.8677	-41.8044
37.9716	113.5	-41.8741	-45.9381
37.9716	113.5	-42.4985	-47.4601
37.9716	113.5	-42.6863	-48.7044
37.9716	113.5	-42.8798	-49.9487
37.9716	113.501	-44.6429	-51.6078
37.9716	113.501	-46.9744	-54.0407
37.9716	113.501	-49.042	-56.2868
37.9716	113.501	-48.7076	-56.0879
37.9716	113.501	-47.1343	-54.3232
37.9716	113.501	-44.2314	-50.3867
37.9716	113.501	-44.8617	-51.017
37.9716	113.502	-45.1098	-51.1865
37.9716	113.502	-39.4873	-44.4437
37.9716	113.502	-38.0961	-42.8504
37.9716	113.502	-37.5341	-42.0968
37.9716	113.502	-37.3239	-41.4715
37.9716	113.502	-37.0984	-40.8462
37.9716	113.502	-37.2518	-40.8061
37.9716	113.503	-37.3776	-40.7587
37.9716	113.503	-37.4569	-40.7113
37.9716	113.503	-37.5846	-40.6639
37.9716	113.503	-37.3061	-40.2746
37.9716	113.503	-37.0281	-39.8852
37.9716	113.503	-37.7284	-40.8582
37.9716	113.503	-39.62	-43.5827
37.9716	113.503	-40.9034	-45.2574
37.9716	113.504	-40.286	-44.3493
37.9716	113.504	-38.8383	-42.2616
37.9716	113.504	-38.278	-41.4064
37.9716	113.504	-38.4716	-41.1825
37.9716	113.504	-38.2886	-40.1868
37.9716	113.504	-37.6505	-39.0084
37.9716	113.504	-36.3583	-37.7425
37.9716	113.504	-35.6694	-37.0657
37.9716	113.505	-35.2609	-36.607
37.9716	113.505	-35.6224	-37.0431
37.9716	113.505	-36.2194	-37.4792
37.9716	113.505	-35.5115	-37.0601
37.9716	113.505	-34.7365	-36.423
37.9716	113.505	-34.0405	-35.7858
37.9716	113.505	-31.2216	-33.1059
37.9716	113.505	-28.4329	-30.426
37.9716	113.506	-25.6492	-27.746
37.9716	113.506	-25.6492	-27.746
37.9716	113.506	-32.6153	-36.4282
37.9716	113.506	-32.6153	-36.4282
37.9716	113.506	-32.6153	-36.4282
37.9716	113.507	-21.6969	-25.2631
37.9716	113.507	-21.6515	-24.766
37.9716	113.507	-21.9439	-24.7334
37.9716	113.507	-22.1646	-27.3837
37.9716	113.507	-22.1646	-27.3837
37.9716	113.507	-22.1646	-27.3837
37.9716	113.508	-20.8227	-24.6066
37.9715	113.499	0.914789	-2.72327
37.9715	113.499	0.642545	-3.11454
37.9715	113.499	0.354264	-3.50582
37.9715	113.499	-0.203548	-4.02883
37.9715	113.499	-1.40148	-4.94828
37.9715	113.499	-4.14969	-7.48455
37.9715	113.499	-9.62557	-12.992
37.9715	113.499	-15.5196	-18.9965
37.9715	113.5	-21.8232	-25.2692
37.9715	113.5	-26.0812	-29.3445
37.9715	113.5	-35.1644	-39.0948
37.9715	113.5	-39.3578	-43.7775
37.9715	113.5	-42.5622	-47.4197
37.9715	113.5	-43.0527	-48.6439
37.9715	113.5	-43.6517	-49.9556
37.9715	113.5	-44.2165	-51.2673
37.9715	113.501	-45.4121	-52.2442
37.9715	113.501	-48.2438	-55.4032
37.9715	113.501	-47.9179	-55.409
37.9715	113.501	-47.2535	-54.7923
37.9715	113.501	-46.6659	-53.8118
37.9715	113.501	-45.7569	-52.2917
37.9715	113.501	-45.5216	-51.6107
37.9715	113.502	-45.5762	-51.4783
37.9715	113.502	-44.4555	-50.1956
37.9715	113.502	-37.1179	-41.6944
37.9715	113.502	-36.7128	-41.1459
37.9715	113.502	-36.8237	-40.9403
37.9715	113.502	-36.4083	-40.2913
37.9715	113.502	-36.1416	-39.8097
37.9715	113.503	-35.5541	-39.2813
37.9715	113.503	-35.8548	-39.4967
37.9715	113.503	-36.1599	-39.712
37.9715	113.503	-38.4684	-41.6202
37.9715	113.503	-40.3911	-43.2279
37.9715	113.503	-42.8515	-46.0347
37.9715	113.503	-44.6843	-48.4327
37.9715	113.503	-45.4699	-49.6141
37.9715	113.504	-44.7704	-48.609
37.9715	113.504	-42.8869	-46.0043
37.9715	113.504	-41.3531	-44.2157
37.9715	113.504	-41.1688	-43.6266
37.9715	113.504	-42.8113	-43.6503
37.9715	113.504	-42.738	-44.0746
37.9715	113.504	-42.4407	-44.0015
37.9715	113.504	-42.2168	-43.7164
37.9715	113.505	-41.7866	-43.4751
37.9715	113.505	-41.8898	-43.563
37.9715	113.505	-42.0482	-43.6508
37.9715	113.505	-40.1358	-42.2328
37.9715	113.505	-38.4804	-40.771
37.9715	113.505	-36.8039	-39.3092
37.9715	113.505	-34.0073	-36.6911
37.9715	113.505	-31.7729	-34.8127
37.9715	113.506	-29.5481	-32.9344
37.9715	113.506	-31.3944	-35.5241
37.9715	113.506	-33.5035	-38.05
37.9715	113.506	-32.313	-36.465
37.9715	113.506	-31.3654	-35.5323
37.9715	113.507	-21.9147	-24.5291
37.9715	113.507	-22.063	-24.5655
37.9715	113.507	-22.5686	-24.6868
37.9715	113.507	-22.717	-24.7232
37.9715	113.507	-22.2871	-27.3934
37.9715	113.507	-22.1579	-27.1356
37.9715	113.507	-21.4905	-25.571
37.9715	113.508	-22.1616	-24.9455
37.9714	113.499	2.09161	-2.12459
37.9714	113.499	1.5636	-2.83161
37.9714	113.499	1.02288	-3.53863
37.9714	113.499	-0.399714	-4.72963
37.9714	113.499	-2.10463	-5.71672
37.9714	113.499	-5.85029	-8.91811
37.9714	113.499	-10.2175	-13.3195
37.9714	113.499	-14.7007	-18.1349
37.9714	113.5	-22.103	-25.885
37.9714	113.5	-41.3926	-46.5398
37.9714	113.5	-42.2121	-47.6264
37.9714	113.5	-42.5657	-48.3494
37.9714	113.5	-44.0278	-50.3021
37.9714	113.5	-45.4436	-52.2548
37.9714	113.501	-46.1106	-52.6487
37.9714	113.501	-46.7421	-53.3536
37.9714	113.501	-47.9333	-55.2639
37.9714	113.501	-47.6624	-54.9604
37.9714	113.501	-47.3235	-54.4532
37.9714	113.501	-44.9158	-50.6841
37.9714	113.502	-44.8292	-50.4671
37.9714	113.502	-44.8661	-50.4524
37.9714	113.502	-35.9574	-40.5002
37.9714	113.502	-35.9574	-40.5002
37.9714	113.502	-36.2219	-40.5356
37.9714	113.502	-34.9138	-39.0922
37.9714	113.502	-33.6345	-37.6488
37.9714	113.503	-33.1904	-37.2371
37.9714	113.503	-34.7695	-38.5229
37.9714	113.503	-36.3374	-39.8086
37.9714	113.503	-40.6949	-43.6441
37.9714	113.503	-44.2869	-46.7797
37.9714	113.503	-47.7743	-50.5561
37.9714	113.503	-48.3683	-51.8375
37.9714	113.503	-48.9821	-52.5331
37.9714	113.504	-48.4617	-51.9833
37.9714	113.504	-47.4948	-50.4156
37.9714	113.504	-47.6654	-49.0565
37.9714	113.504	-47.9367	-48.6302
37.9714	113.504	-47.9946	-48.9091
37.9714	113.504	-48.3563	-49.5652
37.9714	113.504	-49.0377	-50.5406
37.9714	113.504	-49.5137	-51.188
37.9714	113.505	-49.6633	-51.6758
37.9714	113.505	-48.9936	-51.3216
37.9714	113.505	-48.5668	-50.9675
37.9714	113.505	-45.736	-48.6503
37.9714	113.505	-43.1038	-46.1295
37.9714	113.505	-40.3401	-43.6088
37.9714	113.505	-37.1827	-40.7354
37.9714	113.505	-35.2748	-39.519
37.9714	113.506	-33.4961	-38.3025
37.9714	113.506	-35.9176	-41.6313
37.9714	113.506	-35.6573	-41.141
37.9714	113.506	-33.7803	-38.8463
37.9714	113.506	-30.9968	-35.3142
37.9714	113.506	-29.6353	-33.9111
37.9714	113.506	-29.2325	-33.4902
37.9714	113.507	-22.9626	-25.0476
37.9714	113.507	-23.3487	-25.1852
37.9714	113.507	-23.4048	-25.1987
37.9714	113.507	-21.6097	-25.7741
37.9714	113.507	-21.3101	-25.078
37.9714	113.507	-20.2566	-22.7577
37.9714	113.508	-19.957	-22.0616
37.9714	113.508	-24.541	-26.0455
37.9714	113.508	-24.541	-26.0455
37.9712	113.499	4.0241	-0.381592
37.9712	113.499	2.86046	-1.67398
37.9712	113.499	1.19148	-3.52465
37.9712	113.499	-1.56432	-5.99164
37.9712	113.499	-4.25052	-7.71632
37.9712	113.499	-8.02602	-10.8294
37.9712	113.499	-12.1901	-15.1185
37.9712	113.499	-15.1473	-18.7033
37.9712	113.5	-24.2661	-28.5127
37.9712	113.5	-34.0494	-38.8203
37.9712	113.5	-45.0102	-50.8219
37.9712	113.5	-43.4017	-49.0843
37.9712	113.5	-41.9854	-47.7328
37.9712	113.5	-42.4973	-48.5372
37.9712	113.5	-46.4821	-52.7237
37.9712	113.501	-46.8087	-53.019
37.9712	113.501	-46.8486	-53.0628
37.9712	113.501	-49.6116	-56.2934
37.9712	113.501	-49.6116	-56.2934
37.9712	113.501	-49.6116	-56.2934
37.9712	113.501	-43.2896	-48.6654
37.9712	113.502	-43.2896	-48.6654
37.9712	113.502	-43.2896	-48.6654
37.9712	113.502	-35.8875	-40.625
37.9712	113.502	-36.0081	-40.7701
37.9712	113.502	-36.9751	-41.5331
37.9712	113.502	-32.5703	-36.979
37.9712	113.503	-31.8047	-36.1321
37.9712	113.503	-35.1544	-38.9511
37.9712	113.503	-38.5289	-41.7702
37.9712	113.503	-43.226	-45.9092
37.9712	113.503	-46.0528	-48.3727
37.9712	113.503	-49.1212	-51.3569
37.9712	113.503	-49.2958	-52.3983
37.9712	113.503	-50.9077	-53.9693
37.9712	113.504	-52.1562	-55.3516
37.9712	113.504	-54.1352	-55.9548
37.9712	113.504	-54.5433	-55.7701
37.9712	113.504	-54.3003	-55.4446
37.9712	113.504	-54.3502	-55.5688
37.9712	113.504	-54.5046	-55.9513
37.9712	113.504	-55.4468	-57.2018
37.9712	113.504	-56.2363	-58.2611
37.9712	113.505	-56.5176	-59.146
37.9712	113.505	-54.7861	-57.7479
37.9712	113.505	-52.9276	-56.3498
37.9712	113.505	-49.3683	-52.9874
37.9712	113.505	-46.3826	-49.9476
37.9712	113.505	-43.3	-46.9078
37.9712	113.505	-40.4556	-44.1927
37.9712	113.506	-36.8569	-42.8949
37.9712	113.506	-38.6631	-45.2322
37.9712	113.506	-38.1813	-44.433
37.9712	113.506	-29.2506	-33.4879
37.9712	113.506	-28.3758	-32.5512
37.9712	113.506	-28.3834	-32.5189
37.9712	113.507	-24.0792	-25.9798
37.9712	113.507	-24.0792	-25.9798
37.9712	113.507	-24.0792	-25.9798
37.9712	113.507	-20.4437	-22.6663
37.9712	113.507	-19.8383	-21.1686
37.9712	113.508	-19.7303	-20.9108
37.9712	113.508	-23.1235	-23.7957
37.9712	113.508	-22.9606	-23.7006
37.9711	113.499	5.8205	1.20035
37.9711	113.499	3.8295	-0.575161
37.9711	113.499	0.676326	-3.74903
37.9711	113.499	-3.88677	-7.86537
37.9711	113.499	-7.68559	-10.8043
37.9711	113.499	-11.5624	-14.2561
37.9711	113.499	-15.4492	-18.4617
37.9711	113.499	-18.1044	-21.8542
37.9711	113.5	-28.3393	-32.8521
37.9711	113.5	-37.1012	-42.1538
37.9711	113.5	-44.7734	-50.6917
37.9711	113.5	-43.9174	-49.9111
37.9711	113.5	-42.8856	-49.1304
37.9711	113.5	-43.1807	-49.9693
37.9711	113.5	-45.3179	-51.4655
37.9711	113.5	-47.1777	-52.9617
37.9711	113.501	-47.234	-53.1035
37.9711	113.501	-47.234	-53.1035
37.9711	113.501	-52.5803	-58.4477
37.9711	113.501	-52.768	-58.6328
37.9711	113.501	-54.1374	-59.9107
37.9711	113.501	-44.9057	-50.155
37.9711	113.502	-42.7481	-47.8544
37.9711	113.502	-44.1616	-49.1941
37.9711	113.502	-38.9563	-43.7411
37.9711	113.502	-37.2621	-41.9938
37.9711	113.502	-38.6201	-43.3003
37.9711	113.502	-36.0314	-40.6777
37.9711	113.502	-33.4473	-38.055
37.9711	113.503	-33.8539	-38.0353
37.9711	113.503	-38.7988	-42.34
37.9711	113.503	-43.2787	-46.1708
37.9711	113.503	-45.2691	-47.7435
37.9711	113.503	-45.0426	-47.3936
37.9711	113.503	-47.0342	-49.3478
37.9711	113.503	-49.4817	-52.1265
37.9711	113.503	-53.5186	-56.2725
37.9711	113.504	-57.299	-60.0289
37.9711	113.504	-60.1458	-62.186
37.9711	113.504	-60.4434	-62.3248
37.9711	113.504	-59.6971	-61.5103
37.9711	113.504	-60.1405	-61.834
37.9711	113.504	-60.9858	-62.8085
37.9711	113.504	-61.0892	-63.1903
37.9711	113.504	-60.747	-63.0847
37.9711	113.505	-59.9878	-62.7635
37.9711	113.505	-57.0188	-60.4492
37.9711	113.505	-54.3278	-58.1349
37.9711	113.505	-50.5015	-54.6018
37.9711	113.505	-48.0858	-51.979
37.9711	113.505	-45.5129	-49.3563
37.9711	113.505	-44.7939	-48.9875
37.9711	113.506	-41.2818	-47.8888
37.9711	113.506	-40.1539	-46.8861
37.9711	113.506	-40.1539	-46.8861
37.9711	113.506	-28.0412	-32.1335
37.9711	113.506	-28.1488	-32.2153
37.9711	113.506	-28.4461	-32.4879
37.9711	113.506	-28.5408	-32.5697
37.9711	113.507	-24.6009	-26.8103
37.9711	113.507	-24.6009	-26.8103
37.9711	113.507	-24.6009	-26.8103
37.9711	113.507	-20.6832	-21.8575
37.9711	113.507	-20.6832	-21.8575
37.9711	113.508	-20.6832	-21.8575
37.9711	113.508	-20.6916	-20.9749
37.9711	113.508	-20.6916	-20.9749
37.9711	113.508	-20.4248	-21.0877
37.971	113.498	6.72444	1.4964
37.971	113.499	6.17862	1.73088
37.971	113.499	3.29318	-0.441794
37.971	113.499	-1.05441	-4.75416
37.971	113.499	-6.36149	-9.80562
37.971	113.499	-10.491	-13.5106
37.971	113.499	-14.1901	-17.1213
37.971	113.499	-18.6837	-21.9299
37.971	113.499	-21.8817	-25.8039
37.971	113.5	-30.1454	-34.9069
37.971	113.5	-36.8251	-42.0729
37.971	113.5	-42.8466	-48.857
37.971	113.5	-43.59	-49.7827
37.971	113.5	-44.2384	-50.7085
37.971	113.5	-45.4512	-52.3964
37.971	113.5	-46.2786	-52.7286
37.971	113.5	-47.2746	-53.3231
37.971	113.501	-47.7538	-53.5371
37.971	113.501	-48.4665	-54.3546
37.971	113.501	-54.8363	-60.1903
37.971	113.501	-55.7557	-61.191
37.971	113.501	-57.3385	-62.8571
37.971	113.501	-53.0668	-58.4124
37.971	113.501	-48.2397	-53.3639
37.971	113.502	-44.3053	-49.1959
37.971	113.502	-46.4596	-51.2923
37.971	113.502	-45.1296	-49.94
37.971	113.502	-40.3763	-44.8982
37.971	113.502	-41.537	-45.9992
37.971	113.502	-39.041	-43.4931
37.971	113.502	-36.5453	-40.9871
37.971	113.503	-36.2949	-40.4318
37.971	113.503	-42.1127	-45.5124
37.971	113.503	-46.3857	-49.1523
37.971	113.503	-46.4744	-48.887
37.971	113.503	-43.3337	-45.7823
37.971	113.503	-46.6155	-48.9601
37.971	113.503	-52.0343	-54.5769
37.971	113.503	-59.2846	-61.7428
37.971	113.504	-63.2794	-65.6445
37.971	113.504	-65.5468	-67.7679
37.971	113.504	-65.2647	-67.4726
37.971	113.504	-64.215	-66.5662
37.971	113.504	-65.2159	-67.6299
37.971	113.504	-67.156	-69.5631
37.971	113.504	-65.6112	-68.2636
37.971	113.504	-63.4847	-65.9975
37.971	113.505	-61.0057	-63.7313
37.971	113.505	-57.7285	-61.2305
37.971	113.505	-54.7299	-58.7296
37.971	113.505	-50.917	-55.4096
37.971	113.505	-49.1627	-53.6002
37.971	113.505	-47.3631	-51.7909
37.971	113.505	-46.6235	-51.5767
37.971	113.505	-44.457	-50.1742
37.971	113.506	-42.4146	-48.7999
37.971	113.506	-40.497	-47.1108
37.971	113.506	-40.7111	-47.2021
37.971	113.506	-28.6275	-32.6665
37.971	113.506	-28.869	-32.8705
37.971	113.506	-28.8957	-32.9008
37.971	113.507	-24.8493	-27.3605
37.971	113.507	-24.8493	-27.3605
37.971	113.507	-24.8493	-27.3605
37.971	113.507	-23.084	-26.0282
37.971	113.507	-22.3341	-24.4829
37.971	113.508	-22.8735	-25.0488
37.971	113.508	-20.3341	-21.2782
37.971	113.508	-18.7523	-19.1946
37.971	113.508	-18.5637	-19.5884
37.971	113.508	-18.7221	-20.2575
37.9709	113.498	6.87019	1.6353
37.9709	113.499	5.56864	1.52974
37.9709	113.499	1.63761	-1.24375
37.9709	113.499	-3.30477	-6.33036
37.9709	113.499	-8.89415	-11.9996
37.9709	113.499	-12.5701	-15.6759
37.9709	113.499	-16.3883	-19.6065
37.9709	113.499	-21.5523	-25.0952
37.9709	113.499	-25.9546	-30.0335
37.9709	113.5	-32.4301	-37.3474
37.9709	113.5	-37.0177	-42.5206
37.9709	113.5	-41.3616	-47.6938
37.9709	113.5	-43.6642	-49.9286
37.9709	113.5	-45.8872	-52.1633
37.9709	113.5	-48.0519	-54.398
37.9709	113.5	-47.854	-54.0404
37.9709	113.5	-48.2791	-54.3887
37.9709	113.501	-48.595	-54.737
37.9709	113.501	-49.6704	-55.9167
37.9709	113.501	-50.7463	-56.6742
37.9709	113.501	-56.7395	-62.2012
37.9709	113.501	-57.6172	-63.1563
37.9709	113.501	-55.4265	-60.8714
37.9709	113.502	-46.8823	-51.6433
37.9709	113.502	-48.3121	-53.0412
37.9709	113.502	-48.5488	-53.2742
37.9709	113.502	-45.093	-49.2196
37.9709	113.502	-45.093	-49.2196
37.9709	113.502	-42.0421	-46.2372
37.9709	113.502	-38.9174	-43.2548
37.9709	113.503	-38.8501	-42.9226
37.9709	113.503	-44.9928	-48.3333
37.9709	113.503	-48.8731	-51.5516
37.9709	113.503	-47.7929	-50.2162
37.9709	113.503	-44.511	-47.0404
37.9709	113.503	-49.9257	-52.2689
37.9709	113.503	-57.9381	-60.2914
37.9709	113.503	-65.8988	-68.1825
37.9709	113.504	-69.5148	-71.6964
37.9709	113.504	-70.5422	-72.8414
37.9709	113.504	-70.0365	-72.5453
37.9709	113.504	-68.7394	-71.6109
37.9709	113.504	-70.1596	-73.3512
37.9709	113.504	-72.6353	-75.744
37.9709	113.504	-69.0704	-71.9515
37.9709	113.504	-64.2296	-66.9625
37.9709	113.505	-59.2378	-61.9736
37.9709	113.505	-56.6101	-59.9699
37.9709	113.505	-53.9069	-57.9661
37.9709	113.505	-50.9953	-55.6464
37.9709	113.505	-49.7076	-54.5959
37.9709	113.505	-48.4664	-53.5454
37.9709	113.505	-47.6562	-53.1558
37.9709	113.505	-45.9469	-51.7831
37.9709	113.506	-43.5438	-49.7442
37.9709	113.506	-40.9471	-47.3172
37.9709	113.506	-40.9973	-47.4302
37.9709	113.506	-41.189	-47.464
37.9709	113.506	-29.1652	-33.1813
37.9709	113.506	-29.1652	-33.1813
37.9709	113.506	-29.1652	-33.1813
37.9709	113.507	-26.3485	-29.801
37.9709	113.507	-26.3485	-29.801
37.9709	113.507	-26.3485	-29.801
37.9709	113.507	-25.195	-30.1404
37.9709	113.507	-24.9262	-29.5294
37.9709	113.507	-23.9696	-27.4927
37.9709	113.508	-24.5523	-27.7162
37.9709	113.508	-23.6561	-25.7123
37.9709	113.508	-23.4005	-25.3271
37.9709	113.508	-20.9316	-22.2484
37.9709	113.508	-19.7897	-21.5426
37.9709	113.508	-18.7553	-20.8232
37.9707	113.498	5.199	-0.0399697
37.9707	113.499	2.33572	-1.53541
37.9707	113.499	-2.80855	-5.40431
37.9707	113.499	-7.20507	-10.1512
37.9707	113.499	-12.0343	-15.2555
37.9707	113.499	-15.4186	-18.6297
37.9707	113.499	-19.2914	-22.5324
37.9707	113.499	-24.7564	-28.3227
37.9707	113.499	-29.373	-33.4697
37.9707	113.5	-34.8504	-39.7861
37.9707	113.5	-38.2493	-43.8574
37.9707	113.5	-41.3887	-47.9287
37.9707	113.5	-44.3809	-50.4988
37.9707	113.5	-47.5182	-53.2224
37.9707	113.5	-50.5742	-55.946
37.9707	113.5	-51.0445	-56.0734
37.9707	113.501	-50.6588	-56.6557
37.9707	113.501	-50.7172	-57.1301
37.9707	113.501	-50.9363	-57.2674
37.9707	113.501	-55.0618	-60.4667
37.9707	113.501	-55.4502	-60.9779
37.9707	113.501	-55.4502	-60.9779
37.9707	113.502	-48.4768	-53.045
37.9707	113.502	-48.4768	-53.045
37.9707	113.502	-46.2816	-50.9111
37.9707	113.502	-43.817	-47.7417
37.9707	113.502	-45.8956	-49.7959
37.9707	113.502	-43.2788	-47.3703
37.9707	113.502	-40.609	-44.9447
37.9707	113.503	-40.3014	-44.5782
37.9707	113.503	-46.8477	-50.4895
37.9707	113.503	-51.2093	-54.2277
37.9707	113.503	-51.0559	-53.6608
37.9707	113.503	-49.0152	-51.5878
37.9707	113.503	-55.0318	-57.5002
37.9707	113.503	-63.7184	-66.1026
37.9707	113.503	-71.4507	-73.6338
37.9707	113.504	-74.2109	-76.2678
37.9707	113.504	-74.1001	-76.4538
37.9707	113.504	-72.9746	-75.6793
37.9707	113.504	-71.7923	-74.9766
37.9707	113.504	-73.2489	-76.8157
37.9707	113.504	-75.1006	-78.789
37.9707	113.504	-70.0882	-73.3879
37.9707	113.504	-63.9832	-67.0002
37.9707	113.505	-57.6632	-60.6126
37.9707	113.505	-55.6101	-59.0599
37.9707	113.505	-53.3749	-57.5073
37.9707	113.505	-51.256	-55.9546
37.9707	113.505	-50.0696	-55.2121
37.9707	113.505	-48.9379	-54.4696
37.9707	113.505	-47.821	-53.7271
37.9707	113.505	-46.8583	-52.7872
37.9707	113.506	-41.2466	-47.1454
37.9707	113.506	-41.4372	-47.1701
37.9707	113.506	-41.4853	-47.1826
37.9707	113.506	-30.3703	-34.8254
37.9707	113.506	-30.3703	-34.8254
37.9707	113.506	-30.3703	-34.8254
37.9707	113.507	-29.4497	-34.4121
37.9707	113.507	-29.4497	-34.4121
37.9707	113.507	-29.5918	-34.6491
37.9707	113.507	-27.261	-32.9986
37.9707	113.507	-26.3799	-32.0666
37.9707	113.507	-25.8372	-30.5717
37.9707	113.508	-25.9443	-28.6935
37.9707	113.508	-25.9072	-28.613
37.9707	113.508	-23.1452	-25.3707
37.9707	113.508	-20.9904	-23.2397
37.9707	113.508	-18.8863	-21.177
37.9707	113.508	-19.7089	-22.7964
37.9706	113.498	3.18743	-2.1864
37.9706	113.499	-2.01429	-6.18724
37.9706	113.499	-8.84276	-12.0168
37.9706	113.499	-12.1728	-15.6744
37.9706	113.499	-15.8961	-19.498
37.9706	113.499	-18.4809	-21.7959
37.9706	113.499	-21.9281	-25.0787
37.9706	113.499	-26.0004	-29.6338
37.9706	113.499	-29.515	-33.8857
37.9706	113.5	-33.386	-38.6112
37.9706	113.5	-36.8529	-42.6687
37.9706	113.5	-40.0391	-46.7261
37.9706	113.5	-42.1269	-48.532
37.9706	113.5	-46.3841	-51.9135
37.9706	113.5	-50.5167	-55.2951
37.9706	113.5	-53.8613	-57.9864
37.9706	113.5	-53.4257	-58.0486
37.9706	113.501	-52.4041	-58.0067
37.9706	113.501	-51.2169	-57.5789
37.9706	113.501	-51.2636	-57.5073
37.9706	113.501	-52.3933	-57.7007
37.9706	113.501	-52.6182	-57.9713
37.9706	113.501	-52.6073	-58.196
37.9706	113.501	-52.7611	-58.2029
37.9706	113.502	-47.6936	-52.0119
37.9706	113.502	-46.8215	-51.0417
37.9706	113.502	-43.3525	-47.8082
37.9706	113.502	-41.3592	-45.7839
37.9706	113.502	-39.8145	-43.7595
37.9706	113.502	-43.041	-46.9891
37.9706	113.502	-42.324	-46.4547
37.9706	113.502	-41.618	-45.9202
37.9706	113.503	-43.5673	-47.7954
37.9706	113.503	-49.8695	-53.6382
37.9706	113.503	-54.7	-57.8906
37.9706	113.503	-54.6148	-57.3652
37.9706	113.503	-55.1909	-57.7341
37.9706	113.503	-60.5256	-63.0293
37.9706	113.503	-68.077	-70.4977
37.9706	113.503	-73.583	-75.842
37.9706	113.504	-76.407	-78.5387
37.9706	113.504	-76.153	-78.6062
37.9706	113.504	-74.9972	-77.8159
37.9706	113.504	-73.5649	-76.9243
37.9706	113.504	-74.4496	-78.098
37.9706	113.504	-75.3811	-79.2716
37.9706	113.504	-69.7103	-73.2289
37.9706	113.504	-63.1475	-66.3846
37.9706	113.505	-56.3955	-59.5403
37.9706	113.505	-54.8051	-58.2342
37.9706	113.505	-52.9878	-57.0519
37.9706	113.505	-51.1889	-55.8695
37.9706	113.505	-49.8846	-55.0884
37.9706	113.505	-48.7232	-54.3412
37.9706	113.505	-47.7925	-53.594
37.9706	113.505	-47.6902	-53.4772
37.9706	113.506	-42.0157	-47.4126
37.9706	113.506	-41.0053	-46.4616
37.9706	113.506	-41.0053	-46.4616
37.9706	113.506	-32.5866	-37.8293
37.9706	113.506	-32.5866	-37.8293
37.9706	113.506	-33.4727	-39.0813
37.9706	113.507	-34.8997	-40.7989
37.9706	113.507	-33.4097	-39.5332
37.9706	113.507	-32.7308	-38.5552
37.9706	113.507	-30.5938	-36.4906
37.9706	113.507	-29.0581	-34.7635
37.9706	113.507	-27.9241	-33.8918
37.9706	113.507	-27.6943	-32.8882
37.9706	113.508	-27.2123	-31.2125
37.9706	113.508	-27.4256	-30.5714
37.9706	113.508	-27.167	-30.2637
37.9706	113.508	-24.1012	-26.9145
37.9706	113.508	-21.0591	-23.5827
37.9706	113.508	-19.2381	-21.7883
37.9706	113.508	-20.292	-23.6364
37.9706	113.508	-21.2485	-25.2663
37.9705	113.498	2.02422	-3.42396
37.9705	113.499	-5.48264	-10.1822
37.9705	113.499	-13.9602	-18.0452
37.9705	113.499	-15.9196	-20.2547
37.9705	113.499	-18.5242	-22.8442
37.9705	113.499	-20.9181	-24.8463
37.9705	113.499	-23.6197	-27.2436
37.9705	113.499	-25.4219	-29.6387
37.9705	113.499	-26.4426	-31.5166
37.9705	113.5	-28.0405	-33.8247
37.9705	113.5	-31.9955	-38.0655
37.9705	113.5	-35.352	-42.3063
37.9705	113.5	-37.7811	-44.727
37.9705	113.5	-43.6039	-49.3753
37.9705	113.5	-49.0491	-53.7766
37.9705	113.5	-54.2526	-58.2214
37.9705	113.5	-53.1381	-57.571
37.9705	113.501	-50.6576	-56.4776
37.9705	113.501	-50.6138	-56.5773
37.9705	113.501	-51.3738	-56.5769
37.9705	113.501	-51.6002	-56.8105
37.9705	113.501	-51.5605	-57.0621
37.9705	113.501	-52.0679	-57.3705
37.9705	113.501	-49.4534	-54.0745
37.9705	113.502	-46.734	-50.7786
37.9705	113.502	-44.6416	-48.4271
37.9705	113.502	-41.624	-45.5681
37.9705	113.502	-39.3957	-43.5465
37.9705	113.502	-37.9348	-41.8066
37.9705	113.502	-40.489	-44.5702
37.9705	113.502	-41.5899	-45.8698
37.9705	113.502	-43.5794	-47.7599
37.9705	113.503	-47.9962	-51.8168
37.9705	113.503	-54.1862	-57.549
37.9705	113.503	-58.314	-61.286
37.9705	113.503	-57.9664	-60.565
37.9705	113.503	-60.1688	-62.4886
37.9705	113.503	-64.9057	-67.2214
37.9705	113.503	-71.0407	-73.3751
37.9705	113.503	-74.3012	-76.6095
37.9705	113.504	-75.8255	-78.1577
37.9705	113.504	-75.6015	-78.2001
37.9705	113.504	-74.6188	-77.4684
37.9705	113.504	-73.6824	-76.9506
37.9705	113.504	-73.6458	-76.9581
37.9705	113.504	-73.4581	-76.9656
37.9705	113.504	-68.7384	-72.1247
37.9705	113.504	-62.6658	-65.7769
37.9705	113.505	-56.3703	-59.4292
37.9705	113.505	-53.9677	-57.1421
37.9705	113.505	-52.2512	-56.2953
37.9705	113.505	-50.7117	-55.4486
37.9705	113.505	-49.3001	-54.7329
37.9705	113.505	-48.4657	-54.1191
37.9705	113.505	-47.7664	-53.5053
37.9705	113.505	-47.6786	-53.2803
37.9705	113.506	-45.122	-50.4917
37.9705	113.506	-41.936	-47.703
37.9705	113.506	-40.6466	-45.8978
37.9705	113.506	-40.6466	-45.8978
37.9705	113.506	-34.6284	-40.3871
37.9705	113.506	-34.6284	-40.3871
37.9705	113.506	-36.2905	-41.9387
37.9705	113.507	-37.5269	-43.2537
37.9705	113.507	-38.5251	-44.5686
37.9705	113.507	-37.1799	-43.2187
37.9705	113.507	-34.6395	-40.2852
37.9705	113.507	-31.7023	-37.1338
37.9705	113.507	-30.3147	-35.6836
37.9705	113.507	-29.4733	-35.0748
37.9705	113.508	-27.2707	-31.1813
37.9705	113.508	-27.3835	-30.9133
37.9705	113.508	-26.6853	-30.0339
37.9705	113.508	-21.4714	-23.9933
37.9705	113.508	-20.2695	-23.1692
37.9705	113.508	-20.94	-24.7189
37.9705	113.508	-21.5137	-26.1202
37.9704	113.498	1.18311	-4.40373
37.9704	113.499	-7.45603	-12.4325
37.9704	113.499	-16.5312	-21.0374
37.9704	113.499	-17.3197	-22.1898
37.9704	113.499	-19.1264	-24.1986
37.9704	113.499	-21.5165	-26.4878
37.9704	113.499	-24.1419	-28.9508
37.9704	113.499	-24.6582	-29.895
37.9704	113.499	-24.1322	-29.9827
37.9704	113.5	-23.8931	-29.9638
37.9704	113.5	-27.5878	-34.0551
37.9704	113.5	-31.0731	-38.1463
37.9704	113.5	-33.6386	-41.0024
37.9704	113.5	-38.8717	-45.2855
37.9704	113.5	-45.7242	-50.9873
37.9704	113.5	-53.1484	-57.3549
37.9704	113.5	-51.683	-56.2431
37.9704	113.501	-50.7556	-55.5072
37.9704	113.501	-49.652	-54.7713
37.9704	113.501	-49.6972	-54.8366
37.9704	113.501	-50.1497	-55.0884
37.9704	113.501	-52.5542	-57.4252
37.9704	113.501	-52.9284	-57.6314
37.9704	113.501	-50.5472	-54.5335
37.9704	113.502	-48.0599	-51.4356
37.9704	113.502	-45.3739	-48.2691
37.9704	113.502	-43.6234	-46.6246
37.9704	113.502	-41.5422	-44.9801
37.9704	113.502	-40.2306	-43.7493
37.9704	113.502	-41.6906	-45.4913
37.9704	113.502	-42.7786	-47.2332
37.9704	113.502	-47.2373	-51.178
37.9704	113.503	-53.6018	-56.6532
37.9704	113.503	-58.7285	-61.3138
37.9704	113.503	-59.9049	-62.3533
37.9704	113.503	-58.7165	-60.911
37.9704	113.503	-62.2741	-64.2986
37.9704	113.503	-67.3276	-69.3995
37.9704	113.503	-72.4906	-74.8074
37.9704	113.503	-74.1455	-76.5991
37.9704	113.504	-75.0178	-77.6818
37.9704	113.504	-74.7324	-77.609
37.9704	113.504	-74.0794	-77.1371
37.9704	113.504	-73.4903	-76.6835
37.9704	113.504	-72.3553	-75.5385
37.9704	113.504	-71.1353	-74.3934
37.9704	113.504	-67.6387	-70.8411
37.9704	113.504	-62.9325	-65.9465
37.9704	113.505	-57.9062	-61.0518
37.9704	113.505	-55.2792	-58.3548
37.9704	113.505	-53.8292	-57.5792
37.9704	113.505	-51.9647	-56.8037
37.9704	113.505	-50.4641	-56.0718
37.9704	113.505	-49.5717	-55.126
37.9704	113.505	-48.7236	-54.1802
37.9704	113.505	-48.0229	-53.358
37.9704	113.506	-45.6724	-50.8668
37.9704	113.506	-43.2852	-48.3755
37.9704	113.506	-40.8125	-45.9082
37.9704	113.506	-40.8125	-45.9082
37.9704	113.506	-35.5491	-41.1393
37.9704	113.506	-35.5491	-41.1393
37.9704	113.506	-37.3817	-42.7264
37.9704	113.507	-38.3166	-44.0136
37.9704	113.507	-39.1352	-45.3007
37.9704	113.507	-38.5694	-44.4569
37.9704	113.507	-32.9589	-38.2604
37.9704	113.507	-32.6113	-37.7715
37.9704	113.507	-32.6113	-37.7715
37.9704	113.508	-26.8554	-31.0842
37.9704	113.508	-26.8554	-31.0842
37.9704	113.508	-25.8237	-29.663
37.9704	113.508	-23.84	-27.0422
37.9704	113.508	-21.653	-24.4448
37.9704	113.508	-20.9521	-24.5691
37.9704	113.508	-20.7318	-25.3368
37.9704	113.508	-20.738	-25.9135
37.9704	113.509	-20.986	-26.0669
37.9702	113.498	0.388608	-5.7006
37.9702	113.499	-7.62459	-12.927
37.9702	113.499	-15.9211	-20.7067
37.9702	113.499	-16.4216	-21.8133
37.9702	113.499	-18.3466	-24.2827
37.9702	113.499	-21.5261	-27.5616
37.9702	113.499	-24.4636	-30.2872
37.9702	113.499	-25.5156	-31.3135
37.9702	113.499	-24.9867	-30.9769
37.9702	113.5	-24.8641	-30.6404
37.9702	113.5	-27.9006	-34.0519
37.9702	113.5	-30.5425	-37.4634
37.9702	113.5	-33.4861	-40.8749
37.9702	113.5	-36.6047	-43.4674
37.9702	113.5	-49.3218	-54.2318
37.9702	113.5	-47.9353	-53.1863
37.9702	113.501	-47.6634	-52.6776
37.9702	113.501	-47.375	-52.1689
37.9702	113.501	-47.3361	-51.9072
37.9702	113.501	-47.3361	-51.9072
37.9702	113.501	-53.7458	-57.6391
37.9702	113.501	-53.7458	-57.6391
37.9702	113.501	-52.4043	-55.4858
37.9702	113.502	-50.9478	-53.3326
37.9702	113.502	-49.3102	-51.1793
37.9702	113.502	-47.6107	-49.7265
37.9702	113.502	-45.8344	-48.2736
37.9702	113.502	-44.84	-47.5153
37.9702	113.502	-45.9472	-48.7812
37.9702	113.502	-46.7686	-50.0581
37.9702	113.502	-51.1541	-54.0565
37.9702	113.503	-55.9761	-58.4363
37.9702	113.503	-60.0605	-62.0643
37.9702	113.503	-59.3353	-60.9522
37.9702	113.503	-58.9547	-60.5082
37.9702	113.503	-63.0953	-64.7884
37.9702	113.503	-68.2814	-70.3926
37.9702	113.503	-73.2633	-75.8232
37.9702	113.503	-74.6202	-77.4114
37.9702	113.504	-75.925	-78.9997
37.9702	113.504	-74.3348	-77.5858
37.9702	113.504	-72.7115	-76.0309
37.9702	113.504	-70.887	-74.4954
37.9702	113.504	-70.0225	-73.3711
37.9702	113.504	-69.0581	-72.2468
37.9702	113.504	-67.6586	-70.6633
37.9702	113.504	-64.6697	-67.6751
37.9702	113.505	-61.4927	-64.687
37.9702	113.505	-58.6699	-62.1388
37.9702	113.505	-57.2562	-61.2048
37.9702	113.505	-55.3172	-60.2708
37.9702	113.505	-53.7778	-59.3368
37.9702	113.505	-52.0807	-57.4555
37.9702	113.505	-50.3594	-55.5742
37.9702	113.505	-48.6303	-53.6928
37.9702	113.506	-46.1855	-51.2279
37.9702	113.506	-44.1678	-49.1531
37.9702	113.506	-42.0803	-47.0783
37.9702	113.506	-43.4057	-48.3325
37.9702	113.506	-38.3443	-43.2822
37.9702	113.506	-36.546	-41.5765
37.9702	113.506	-37.5194	-42.5561
37.9702	113.507	-38.2875	-43.5356
37.9702	113.507	-38.6651	-44.5151
37.9702	113.507	-38.6651	-44.5151
37.9702	113.507	-34.1412	-39.4719
37.9702	113.507	-34.1412	-39.4719
37.9702	113.507	-32.1374	-37.4124
37.9702	113.508	-24.5707	-29.3836
37.9702	113.508	-25.5907	-30.3271
37.9702	113.508	-24.9229	-28.9616
37.9702	113.508	-24.2417	-27.5961
37.9702	113.508	-22.6615	-25.8473
37.9702	113.508	-21.6057	-25.8681
37.9702	113.508	-20.3591	-25.7156
37.9702	113.508	-19.7244	-25.5402
37.9702	113.509	-19.5398	-25.0525
37.9701	113.498	-0.0470705	-6.82441
37.9701	113.499	-7.07284	-13.0364
37.9701	113.499	-14.6488	-20.0891
37.9701	113.499	-15.6041	-21.7706
37.9701	113.499	-18.3748	-24.8434
37.9701	113.499	-21.9506	-28.4667
37.9701	113.499	-24.9071	-31.2494
37.9701	113.499	-27.3274	-33.1326
37.9701	113.499	-28.2055	-33.7568
37.9701	113.5	-28.65	-34.3811
37.9701	113.5	-30.5532	-36.7515
37.9701	113.5	-32.1881	-38.8561
37.9701	113.5	-33.7453	-40.9607
37.9701	113.5	-32.9918	-40.1144
37.9701	113.5	-41.0475	-47.0556
37.9701	113.5	-42.9991	-48.9254
37.9701	113.501	-43.5133	-48.8209
37.9701	113.501	-44.0246	-48.7164
37.9701	113.501	-44.4753	-48.6119
37.9701	113.501	-46.187	-50.1652
37.9701	113.501	-54.3602	-58.0833
37.9701	113.501	-53.9961	-57.3347
37.9701	113.501	-53.5084	-56.0541
37.9701	113.502	-52.8512	-54.7735
37.9701	113.502	-52.2043	-53.7686
37.9701	113.502	-49.8607	-51.659
37.9701	113.502	-47.4641	-49.5495
37.9701	113.502	-46.8862	-48.9645
37.9701	113.502	-48.8815	-50.5225
37.9701	113.502	-50.6156	-52.0295
37.9701	113.502	-53.5287	-54.7328
37.9701	113.503	-56.013	-57.1637
37.9701	113.503	-58.3262	-59.1943
37.9701	113.503	-56.8298	-57.7032
37.9701	113.503	-57.7963	-59.0994
37.9701	113.503	-62.0921	-63.9317
37.9701	113.503	-67.3446	-69.8039
37.9701	113.503	-71.7715	-74.8318
37.9701	113.503	-73.6103	-76.9974
37.9701	113.504	-75.3757	-79.1629
37.9701	113.504	-72.6211	-76.4035
37.9701	113.504	-69.7851	-73.5217
37.9701	113.504	-66.6438	-70.6398
37.9701	113.504	-67.118	-70.696
37.9701	113.504	-67.5167	-70.7523
37.9701	113.504	-67.8728	-70.8085
37.9701	113.504	-66.2684	-69.3309
37.9701	113.505	-64.266	-67.695
37.9701	113.505	-62.1181	-66.0591
37.9701	113.505	-60.8415	-64.8632
37.9701	113.505	-59.0559	-63.762
37.9701	113.505	-57.6051	-62.6608
37.9701	113.505	-55.0994	-60.1182
37.9701	113.505	-52.7295	-57.6391
37.9701	113.505	-50.3785	-55.1601
37.9701	113.506	-48.1608	-52.9933
37.9701	113.506	-46.227	-51.0599
37.9701	113.506	-44.2844	-49.1266
37.9701	113.506	-46.1206	-50.8825
37.9701	113.506	-43.7536	-48.4449
37.9701	113.506	-41.2511	-46.0074
37.9701	113.506	-38.7616	-43.5045
37.9701	113.506	-38.7848	-43.6122
37.9701	113.507	-38.6985	-43.7199
37.9701	113.507	-38.4127	-43.8276
37.9701	113.507	-38.4127	-43.8276
37.9701	113.507	-35.8819	-41.3542
37.9701	113.507	-35.8819	-41.3542
37.9701	113.507	-32.0395	-37.2795
37.9701	113.507	-26.7584	-32.3074
37.9701	113.508	-22.4794	-27.3354
37.9701	113.508	-24.0558	-28.7617
37.9701	113.508	-24.4452	-28.4721
37.9701	113.508	-24.8112	-28.1824
37.9701	113.508	-22.9541	-26.701
37.9701	113.508	-21.2905	-26.2502
37.9701	113.508	-19.4818	-25.6001
37.9701	113.508	-19.0698	-25.3435
37.9701	113.509	-18.8157	-24.6882
37.9701	113.509	-17.3324	-22.0928
37.97	113.498	0.491427	-6.95345
37.97	113.499	-5.6035	-12.6519
37.97	113.499	-12.2709	-18.8362
37.97	113.499	-14.3036	-21.1027
37.97	113.499	-17.8893	-24.5105
37.97	113.499	-21.6315	-27.9841
37.97	113.499	-24.3714	-30.5325
37.97	113.499	-26.9834	-32.6236
37.97	113.499	-28.7217	-34.3257
37.97	113.5	-30.1435	-36.0278
37.97	113.5	-31.8858	-38.1466
37.97	113.5	-32.2815	-38.8473
37.97	113.5	-32.6544	-39.5481
37.97	113.5	-31.4844	-38.3202
37.97	113.5	-33.9509	-40.5742
37.97	113.5	-35.868	-42.3687
37.97	113.5	-37.8262	-44.3418
37.97	113.501	-38.3437	-44.1778
37.97	113.501	-39.2112	-44.2248
37.97	113.501	-40.0739	-44.2719
37.97	113.501	-42.0897	-46.2326
37.97	113.501	-47.5109	-51.629
37.97	113.501	-52.8689	-57.0254
37.97	113.501	-53.4046	-56.9201
37.97	113.501	-52.5697	-55.3273
37.97	113.502	-51.6052	-53.7345
37.97	113.502	-51.2646	-52.9691
37.97	113.502	-48.8049	-50.6718
37.97	113.502	-45.9552	-48.2648
37.97	113.502	-45.6475	-48.1651
37.97	113.502	-47.0785	-49.7856
37.97	113.502	-48.444	-51.5951
37.97	113.502	-48.7843	-52.3445
37.97	113.503	-48.8555	-52.9535
37.97	113.503	-50.5483	-53.997
37.97	113.503	-50.9309	-53.8073
37.97	113.503	-54.7919	-56.9607
37.97	113.503	-59.9942	-62.3102
37.97	113.503	-65.5096	-68.3632
37.97	113.503	-69.1809	-72.9168
37.97	113.503	-70.4412	-74.7604
37.97	113.504	-71.5628	-76.604
37.97	113.504	-68.8228	-73.3975
37.97	113.504	-65.9228	-70.1909
37.97	113.504	-62.5797	-66.9843
37.97	113.504	-64.7638	-68.6007
37.97	113.504	-66.9626	-70.3543
37.97	113.504	-69.1524	-72.1079
37.97	113.504	-68.4509	-71.6972
37.97	113.505	-66.4799	-69.9719
37.97	113.505	-64.4242	-68.2467
37.97	113.505	-62.48	-66.2143
37.97	113.505	-61.3145	-65.1668
37.97	113.505	-59.6173	-64.1193
37.97	113.505	-57.1539	-61.7915
37.97	113.505	-55.1267	-59.6561
37.97	113.505	-53.0007	-57.5207
37.97	113.506	-51.2923	-55.9453
37.97	113.506	-47.8345	-52.5839
37.97	113.506	-49.2711	-53.9893
37.97	113.506	-46.8051	-51.3891
37.97	113.506	-44.1237	-48.7889
37.97	113.506	-41.1607	-45.7985
37.97	113.506	-40.5531	-45.376
37.97	113.507	-39.9405	-44.9536
37.97	113.507	-39.2925	-44.5311
37.97	113.507	-39.2925	-44.5311
37.97	113.507	-36.6915	-41.7178
37.97	113.507	-36.6915	-41.7178
37.97	113.507	-31.7745	-36.7088
37.97	113.507	-26.5477	-32.0376
37.97	113.508	-22.3523	-27.3664
37.97	113.508	-23.5625	-28.144
37.97	113.508	-24.2847	-28.2652
37.97	113.508	-24.7694	-28.2691
37.97	113.508	-22.8161	-27.0523
37.97	113.508	-20.7626	-26.175
37.97	113.508	-19.0896	-25.5216
37.97	113.508	-19.0352	-25.5386
37.97	113.509	-18.8272	-24.8095
37.97	113.509	-17.2549	-21.9768
37.9699	113.499	-3.1961	-11.345
37.9699	113.499	-9.30118	-17.0862
37.9699	113.499	-11.6771	-19.3274
37.9699	113.499	-14.916	-22.2462
37.9699	113.499	-19.1446	-25.8694
37.9699	113.499	-22.5611	-28.8476
37.9699	113.499	-25.2683	-31.4754
37.9699	113.499	-27.4679	-33.5285
37.9699	113.5	-29.2286	-35.5817
37.9699	113.5	-31.1964	-37.6748
37.9699	113.5	-30.9996	-37.5523
37.9699	113.5	-30.5072	-37.209
37.9699	113.5	-29.4016	-36.1308
37.9699	113.5	-30.179	-36.9741
37.9699	113.5	-31.2296	-38.0813
37.9699	113.5	-32.6122	-39.5565
37.9699	113.501	-33.402	-39.8788
37.9699	113.501	-34.015	-39.566
37.9699	113.501	-34.6193	-39.2532
37.9699	113.501	-38.8963	-43.1865
37.9699	113.501	-45.8489	-50.1563
37.9699	113.501	-52.773	-57.1261
37.9699	113.501	-53.7909	-57.2593
37.9699	113.501	-52.255	-54.9321
37.9699	113.502	-50.5799	-52.6048
37.9699	113.502	-49.3541	-51.1595
37.9699	113.502	-47.0767	-49.1053
37.9699	113.502	-43.9795	-46.811
37.9699	113.502	-43.1776	-46.9943
37.9699	113.502	-43.487	-47.8024
37.9699	113.502	-43.3089	-48.8881
37.9699	113.502	-42.6147	-48.6559
37.9699	113.503	-41.893	-48.4237
37.9699	113.503	-43.4612	-49.129
37.9699	113.503	-45.9401	-50.3615
37.9699	113.503	-51.0362	-54.3963
37.9699	113.503	-57.2238	-60.3993
37.9699	113.503	-62.9216	-66.1449
37.9699	113.503	-65.856	-70.0141
37.9699	113.503	-66.3689	-71.3504
37.9699	113.504	-66.7526	-72.6867
37.9699	113.504	-65.5567	-71.2202
37.9699	113.504	-63.8181	-69.0004
37.9699	113.504	-61.2663	-66.1464
37.9699	113.504	-63.5734	-67.553
37.9699	113.504	-67.3303	-70.8211
37.9699	113.504	-70.1506	-73.2721
37.9699	113.504	-69.7865	-73.29
37.9699	113.505	-67.1411	-70.6887
37.9699	113.505	-64.492	-68.0874
37.9699	113.505	-61.8184	-65.3147
37.9699	113.505	-61.0451	-64.574
37.9699	113.505	-60.1078	-63.8332
37.9699	113.505	-58.336	-62.4175
37.9699	113.505	-56.7264	-61.1319
37.9699	113.505	-55.4363	-59.8463
37.9699	113.506	-55.2821	-59.8583
37.9699	113.506	-53.2093	-57.783
37.9699	113.506	-52.6314	-57.2766
37.9699	113.506	-49.2818	-53.8404
37.9699	113.506	-45.8787	-50.4042
37.9699	113.506	-42.442	-46.968
37.9699	113.506	-41.8555	-46.6383
37.9699	113.507	-41.1791	-46.3086
37.9699	113.507	-40.5615	-45.9788
37.9699	113.507	-40.5615	-45.9788
37.9699	113.507	-37.8942	-42.5727
37.9699	113.507	-37.8942	-42.5727
37.9699	113.507	-33.587	-38.3691
37.9699	113.507	-29.1623	-34.1655
37.9699	113.508	-24.7425	-29.9619
37.9699	113.508	-24.4131	-29.2824
[truncated: 1,934 more rows]
