# Supplementary material for: Mine subsidence monitoring and prediction integrating SBAS-InSAR technology and BO-Prophet model
Source: PeerJ journal article supplement (doi:10.7717/peerj-cs.3327), 2025-10-28
Supplement: Figure123.xlsx [file Figure123.xlsx]

## Sheet: Sheet1
y	x	SBAS-InSAR	Prediction
37.9743	113.5	-25.2423	-31.5146
37.9743	113.5	-22.9483	-29.1529
37.9743	113.5	-29.4018	-32.2422
37.9743	113.5	-28.9127	-35.1692
37.9743	113.501	-30.0675	-36.3836
37.9741	113.5	-32.8164	-39.3338
37.9741	113.5	-36.906	-43.4678
37.9741	113.5	-32.5236	-39.0328
37.9741	113.5	-28.1701	-34.5979
37.9741	113.5	-28.8564	-31.6829
37.9741	113.5	-28.2915	-34.7229
37.9741	113.5	-30.4973	-37.0416
37.9741	113.501	-30.8194	-37.3111
37.9741	113.501	-29.6085	-36.1441
37.9741	113.501	-29.2074	-35.7818
37.9741	113.501	-28.8122	-35.2135
37.9741	113.501	-28.1197	-33.8266
37.974	113.5	-29.9017	-36.6019
37.974	113.5	-33.7153	-40.3088
37.974	113.5	-37.7435	-44.0158
37.974	113.5	-34.6716	-40.9553
37.974	113.5	-31.5552	-37.8949
37.974	113.5	-29.363	-35.6865
37.974	113.5	-31.0054	-37.3904
37.974	113.5	-31.5904	-38.2081
37.974	113.501	-30.7701	-37.2989
37.974	113.501	-28.8344	-35.4022
37.974	113.501	-27.6734	-34.2562
37.974	113.501	-27.4057	-33.8168
37.974	113.501	-27.4042	-33.3446
37.974	113.501	-26.5545	-32.4438
37.974	113.501	-24.0547	-30.6536
37.974	113.501	-21.7306	-29.0318
37.974	113.502	-18.7463	-26.7351
37.9739	113.499	-26.3367	-32.7869
37.9739	113.5	-28.873	-35.5823
37.9739	113.5	-31.7858	-38.3776
37.9739	113.5	-34.7765	-41.173
37.9739	113.5	-34.6022	-40.6436
37.9739	113.5	-34.139	-40.1141
37.9739	113.5	-33.212	-39.2898
37.9739	113.5	-32.3772	-38.7001
37.9739	113.5	-30.8925	-37.3448
37.9739	113.501	-29.1763	-35.6381
37.9739	113.501	-27.1577	-33.6386
37.9739	113.501	-26.4023	-31.9556
37.9739	113.501	-25.1067	-31.3545
37.9739	113.501	-25.9656	-31.777
37.9739	113.501	-25.9708	-32.2577
37.9739	113.501	-24.0748	-31.0168
37.9739	113.501	-21.7605	-29.34
37.9739	113.502	-18.941	-27.2353
37.9739	113.502	-17.524	-26.1304
37.9739	113.502	-16.0627	-25.0255
37.9739	113.502	-15.671	-24.8946
37.9738	113.499	-20.2965	-26.833
37.9738	113.499	-25.5155	-29.8274
37.9738	113.5	-24.7138	-31.1648
37.9738	113.5	-25.988	-32.5022
37.9738	113.5	-27.5837	-34.0605
37.9738	113.5	-30.0673	-36.324
37.9738	113.5	-31.9683	-38.1129
37.9738	113.5	-32.77	-38.9987
37.9738	113.5	-30.5038	-36.6781
37.9738	113.5	-28.6932	-34.9568
37.9738	113.501	-27.0819	-33.5707
37.9738	113.501	-25.945	-32.4562
37.9738	113.501	-25.181	-30.813
37.9738	113.501	-24.0058	-30.1455
37.9738	113.501	-24.7766	-30.9989
37.9738	113.501	-25.2618	-32.0066
37.9738	113.501	-23.4399	-30.8077
37.9738	113.501	-21.0714	-28.935
37.9738	113.502	-18.6797	-27.0391
37.9738	113.502	-17.7021	-26.3396
37.9738	113.502	-16.5218	-25.3784
37.9738	113.502	-15.7228	-24.7591
37.9738	113.502	-14.8584	-23.4114
37.9738	113.502	-10.614	-18.2088
37.9736	113.499	-13.2557	-18.218
37.9736	113.499	-15.2225	-21.3666
37.9736	113.499	-18.3842	-24.5151
37.9736	113.5	-21.4364	-25.2444
37.9736	113.5	-19.2091	-25.3884
37.9736	113.5	-20.2829	-26.6142
37.9736	113.5	-24.3123	-30.6501
37.9736	113.5	-27.7448	-33.9879
37.9736	113.5	-29.0555	-35.3103
37.9736	113.5	-26.6926	-32.9231
37.9736	113.5	-27.0595	-32.0963
37.9736	113.501	-26.4735	-32.2071
37.9736	113.501	-26.8381	-32.9518
37.9736	113.501	-26.1957	-32.8134
37.9736	113.501	-26.4442	-32.7241
37.9736	113.501	-26.044	-32.6836
37.9736	113.501	-25.7221	-32.7899
37.9736	113.501	-23.8354	-31.4014
37.9736	113.501	-21.0522	-29.0866
37.9736	113.502	-18.2478	-26.7718
37.9736	113.502	-17.6966	-26.3842
37.9736	113.502	-16.5359	-25.1776
37.9736	113.502	-15.3029	-23.9709
37.9736	113.502	-14.2102	-22.4729
37.9736	113.502	-13.2496	-21.4102
37.9736	113.502	-10.3838	-17.4242
37.9736	113.503	-11.4482	-18.1911
37.9736	113.503	-13.7569	-20.2153
37.9735	113.499	-8.59774	-13.5638
37.9735	113.499	-12.0585	-16.6328
37.9735	113.499	-15.496	-19.7017
37.9735	113.5	-16.1016	-20.456
37.9735	113.5	-15.25	-19.544
37.9735	113.5	-16.1941	-20.3617
37.9735	113.5	-20.5	-24.4782
37.9735	113.5	-23.9129	-27.9304
37.9735	113.5	-25.108	-29.2304
37.9735	113.5	-24.1348	-28.6803
37.9735	113.5	-26.0418	-31.4407
37.9735	113.501	-28.4534	-34.6233
37.9735	113.501	-30.7733	-37.5472
37.9735	113.501	-30.8703	-38.1137
37.9735	113.501	-30.4787	-37.8006
37.9735	113.501	-28.9668	-36.0413
37.9735	113.501	-26.9839	-34.2819
37.9735	113.501	-24.9124	-32.4986
37.9735	113.502	-18.0924	-26.6181
37.9735	113.502	-17.9209	-26.4937
37.9735	113.502	-16.9758	-25.2658
37.9735	113.502	-15.4323	-23.5413
37.9735	113.502	-14.2964	-22.0076
37.9735	113.502	-15.0522	-22.4285
37.9735	113.502	-16.2664	-22.0723
37.9735	113.503	-16.2684	-21.7848
37.9735	113.503	-18.4908	-23.4781
37.9735	113.503	-17.7662	-23.0467
37.9735	113.503	-17.01	-22.6152
37.9735	113.503	-15.7421	-21.5904
37.9734	113.499	-6.18524	-11.73
37.9734	113.499	-6.83144	-11.9578
37.9734	113.499	-9.11019	-14.2741
37.9734	113.499	-11.4336	-16.5905
37.9734	113.5	-12.0557	-17.4105
37.9734	113.5	-10.61	-15.8794
37.9734	113.5	-11.2972	-16.2923
37.9734	113.5	-15.0744	-19.5817
37.9734	113.5	-18.7573	-23.0828
37.9734	113.5	-19.8277	-24.2532
37.9734	113.5	-21.0401	-26.0627
37.9734	113.5	-25.804	-31.6566
37.9734	113.501	-31.1933	-37.6372
37.9734	113.501	-34.7972	-41.839
37.9734	113.501	-35.2778	-42.6431
37.9734	113.501	-34.5725	-42.0783
37.9734	113.501	-31.8627	-39.2255
37.9734	113.501	-28.9787	-36.3727
37.9734	113.501	-27.9864	-35.4534
37.9734	113.502	-20.5914	-28.7868
37.9734	113.502	-18.6802	-26.9041
37.9734	113.502	-18.3174	-26.1968
37.9734	113.502	-16.7687	-24.4876
37.9734	113.502	-16.0094	-23.2845
37.9734	113.502	-17.0957	-23.9092
37.9734	113.502	-18.6671	-25.0191
37.9734	113.502	-21.3843	-26.7433
37.9734	113.503	-22.7835	-27.5968
37.9734	113.503	-24.0628	-29.3867
37.9734	113.503	-23.2532	-28.5514
37.9734	113.503	-21.6695	-26.7232
37.9734	113.503	-19.3715	-24.7948
37.9734	113.503	-18.3972	-23.958
37.9734	113.503	-17.6054	-23.3198
37.9734	113.503	-15.2023	-21.5671
37.9734	113.504	-11.6031	-18.4659
37.9733	113.499	-6.72386	-12.3222
37.9733	113.499	-7.25613	-12.4332
37.9733	113.499	-8.09761	-13.5579
37.9733	113.499	-8.9299	-14.6827
37.9733	113.5	-9.4217	-15.4243
37.9733	113.5	-8.73963	-14.6173
37.9733	113.5	-9.77126	-15.3253
37.9733	113.5	-12.9171	-17.9315
37.9733	113.5	-16.3551	-21.0772
37.9733	113.5	-17.9741	-22.8238
37.9733	113.5	-20.957	-26.3777
37.9733	113.5	-27.9219	-33.953
37.9733	113.501	-35.0496	-41.4125
37.9733	113.501	-38.1887	-45.0598
37.9733	113.501	-37.3996	-44.5701
37.9733	113.501	-35.5158	-43.0046
37.9733	113.501	-32.9983	-40.545
37.9733	113.501	-30.5393	-38.0854
37.9733	113.501	-29.6304	-37.2362
37.9733	113.501	-27.9137	-35.6749
37.9733	113.502	-20.7125	-28.4257
37.9733	113.502	-21.3611	-28.8456
37.9733	113.502	-22.5207	-29.8074
37.9733	113.502	-21.8432	-28.1827
37.9733	113.502	-22.6949	-28.6174
37.9733	113.502	-25.607	-30.8584
37.9733	113.503	-28.5729	-33.2939
37.9733	113.503	-29.4167	-34.7835
37.9733	113.503	-29.4242	-34.7717
37.9733	113.503	-26.6248	-31.7813
37.9733	113.503	-23.4559	-28.7225
37.9733	113.503	-20.4389	-26.0256
37.9733	113.503	-18.6888	-24.4834
37.9733	113.503	-16.4865	-22.6712
37.9733	113.504	-13.0546	-19.2595
37.9733	113.504	-9.97832	-16.2813
37.9733	113.504	-7.24993	-13.373
37.9733	113.504	-6.77108	-12.9442
37.9733	113.504	-6.71521	-12.8862
37.9731	113.499	-6.90526	-13.0408
37.9731	113.499	-7.64646	-13.1175
37.9731	113.499	-8.41164	-13.1941
37.9731	113.499	-8.05076	-13.2165
37.9731	113.499	-7.67003	-13.2388
37.9731	113.5	-7.54619	-13.4787
37.9731	113.5	-8.08343	-13.9859
37.9731	113.5	-10.0983	-15.7893
37.9731	113.5	-13.3404	-18.6713
37.9731	113.5	-16.6439	-21.7225
37.9731	113.5	-18.7639	-23.9362
37.9731	113.5	-22.8885	-28.3801
37.9731	113.5	-30.1549	-35.8916
37.9731	113.501	-37.1148	-42.9443
37.9731	113.501	-38.9073	-45.3426
37.9731	113.501	-37.1383	-44.2145
37.9731	113.501	-34.9229	-42.7339
37.9731	113.501	-33.32	-41.0809
37.9731	113.501	-31.8849	-39.6116
37.9731	113.501	-30.9974	-38.7325
37.9731	113.501	-31.7129	-39.4799
37.9731	113.502	-26.3526	-33.6326
37.9731	113.502	-25.8054	-32.9192
37.9731	113.502	-29.3194	-36.2182
37.9731	113.502	-27.6808	-34.3135
37.9731	113.502	-26.9357	-32.9273
37.9731	113.502	-25.7952	-31.3338
37.9731	113.502	-28.1836	-33.3819
37.9731	113.503	-30.6635	-35.8434
37.9731	113.503	-32.0816	-37.4104
37.9731	113.503	-33.0806	-38.4768
37.9731	113.503	-30.3361	-35.5323
37.9731	113.503	-27.2448	-32.3353
37.9731	113.503	-23.6306	-28.92
37.9731	113.503	-21.0782	-26.5297
37.9731	113.503	-18.7861	-24.3409
37.9731	113.504	-15.0446	-20.5251
37.9731	113.504	-12.0915	-17.5013
37.9731	113.504	-9.00429	-14.4039
37.9731	113.504	-8.12483	-13.9475
37.9731	113.504	-8.09789	-14.3258
37.9731	113.504	-8.92222	-15.5092
37.9731	113.504	-12.257	-18.5378
37.9731	113.504	-15.6109	-21.5664
37.9731	113.505	-17.1326	-22.8539
37.973	113.499	-5.46163	-11.0948
37.973	113.499	-6.4806	-11.3555
37.973	113.499	-7.49605	-11.6161
37.973	113.499	-7.01289	-11.6071
37.973	113.499	-6.04028	-11.0552
37.973	113.5	-6.31318	-11.6774
37.973	113.5	-8.5674	-13.8516
37.973	113.5	-12.1625	-17.4063
37.973	113.5	-15.9837	-21.1673
37.973	113.5	-19.4406	-24.6316
37.973	113.5	-22.2039	-27.4186
37.973	113.5	-26.638	-31.9879
37.973	113.5	-33.5278	-39.0165
37.973	113.501	-39.7022	-45.3418
37.973	113.501	-40.745	-47.2026
37.973	113.501	-38.5931	-45.9009
37.973	113.501	-36.3156	-44.5991
37.973	113.501	-35.0152	-43.1594
37.973	113.501	-33.6833	-41.6201
37.973	113.501	-32.2233	-40.0807
37.973	113.501	-33.0028	-40.9077
37.973	113.502	-31.1388	-38.9583
37.973	113.502	-30.5518	-37.3497
37.973	113.502	-32.9678	-39.6278
37.973	113.502	-31.9324	-38.4173
37.973	113.502	-29.0623	-34.4682
37.973	113.502	-29.9464	-35.0561
37.973	113.503	-31.5695	-36.6068
37.973	113.503	-33.0053	-37.779
37.973	113.503	-33.7191	-38.9512
37.973	113.503	-31.7807	-36.8642
37.973	113.503	-29.7454	-34.1817
37.973	113.503	-26.2967	-31.0447
37.973	113.503	-23.388	-28.2825
37.973	113.503	-21.0548	-25.9632
37.973	113.504	-17.8264	-22.6412
37.973	113.504	-15.175	-19.9935
37.973	113.504	-12.4284	-17.2795
37.973	113.504	-11.433	-16.835
37.973	113.504	-11.6241	-17.5811
37.973	113.504	-12.2233	-18.7188
37.973	113.504	-14.9009	-21.064
37.973	113.504	-17.5723	-23.4092
37.973	113.505	-19.9287	-25.4293
37.973	113.505	-16.7147	-22.6253
37.973	113.505	-12.6621	-19.2575
37.973	113.505	-8.66679	-15.8896
37.973	113.505	-9.72709	-17.007
37.9729	113.499	-2.52904	-6.94296
37.9729	113.499	-4.19468	-8.29804
37.9729	113.499	-5.83968	-9.65311
37.9729	113.499	-6.17813	-10.5941
37.9729	113.499	-5.31216	-10.101
37.9729	113.5	-5.93945	-10.9936
37.9729	113.5	-9.02218	-13.8335
37.9729	113.5	-13.6415	-18.3456
37.9729	113.5	-18.186	-23.0296
37.9729	113.5	-22.0434	-27.1538
37.9729	113.5	-25.5401	-30.7292
37.9729	113.5	-30.2899	-35.6526
37.9729	113.5	-36.7444	-42.473
37.9729	113.501	-42.1379	-48.2845
37.9729	113.501	-42.8528	-49.8864
37.9729	113.501	-40.5929	-48.3738
37.9729	113.501	-38.1962	-46.8612
37.9729	113.501	-36.943	-45.4519
37.9729	113.501	-34.3115	-42.2677
37.9729	113.501	-34.87	-42.8606
37.9729	113.502	-36.6744	-44.6889
37.9729	113.502	-36.0256	-42.7867
37.9729	113.502	-34.4388	-40.9215
37.9729	113.502	-34.3953	-40.758
37.9729	113.502	-33.7229	-39.8559
37.9729	113.502	-31.0968	-36.143
37.9729	113.503	-31.7476	-36.7916
37.9729	113.503	-33.1763	-37.7684
37.9729	113.503	-33.1137	-38.0467
37.9729	113.503	-32.1343	-36.8517
37.9729	113.503	-31.8557	-35.5937
37.9729	113.503	-30.6839	-34.7341
37.9729	113.503	-29.0211	-33.2728
37.9729	113.503	-25.9884	-30.3342
37.9729	113.504	-21.7298	-26.1946
37.9729	113.504	-18.1858	-22.7224
37.9729	113.504	-16.0045	-20.5868
37.9729	113.504	-15.4961	-20.5792
37.9729	113.504	-16.0308	-21.6394
37.9729	113.504	-16.5539	-22.6996
37.9729	113.504	-18.0588	-23.9713
37.9729	113.504	-19.6252	-25.2431
37.9729	113.505	-21.1252	-26.5148
37.9729	113.505	-18.5827	-24.2548
37.9729	113.505	-11.0955	-18.0789
37.9729	113.505	-11.2317	-18.4145
37.9729	113.505	-9.59736	-16.0114
37.9729	113.505	-7.94311	-13.6082
37.9729	113.505	-6.36147	-11.0708
37.9729	113.506	-6.22587	-10.5937
37.9728	113.499	-0.794673	-4.87915
37.9728	113.499	-0.581933	-3.90593
37.9728	113.499	-2.79109	-6.50393
37.9728	113.499	-5.00599	-9.10193
37.9728	113.499	-6.33063	-11.2262
37.9728	113.499	-5.67027	-10.8969
37.9728	113.5	-6.71666	-11.9791
37.9728	113.5	-9.91769	-14.5853
37.9728	113.5	-14.9749	-19.2627
37.9728	113.5	-19.6425	-24.066
37.9728	113.5	-24.0367	-29.0265
37.9728	113.5	-28.2178	-33.5167
37.9728	113.5	-33.1246	-38.8173
37.9728	113.5	-38.4256	-44.8194
37.9728	113.501	-42.2528	-49.3453
37.9728	113.501	-42.0051	-49.9501
37.9728	113.501	-39.9179	-48.3555
37.9728	113.501	-37.8685	-46.761
37.9728	113.501	-37.4883	-46.2698
37.9728	113.501	-36.4282	-44.8909
37.9728	113.501	-36.898	-45.0059
37.9728	113.501	-37.7333	-45.793
37.9728	113.502	-40.4324	-48.4003
37.9728	113.502	-41.3558	-48.8646
37.9728	113.502	-36.0663	-42.331
37.9728	113.502	-34.2159	-40.3729
37.9728	113.502	-33.9964	-40.0129
37.9728	113.502	-32.9358	-38.0366
37.9728	113.503	-33.4543	-38.5089
37.9728	113.503	-34.8888	-39.6366
37.9728	113.503	-34.2388	-38.994
37.9728	113.503	-33.3911	-37.9104
37.9728	113.503	-34.5078	-37.7744
37.9728	113.503	-35.7298	-39.3249
37.9728	113.503	-35.1802	-39.0671
37.9728	113.503	-31.0571	-35.1372
37.9728	113.504	-25.2479	-29.5131
37.9728	113.504	-21.1672	-25.4536
37.9728	113.504	-19.5169	-23.775
37.9728	113.504	-19.5102	-24.0444
37.9728	113.504	-20.0471	-25.1112
37.9728	113.504	-20.6823	-26.3687
37.9728	113.504	-21.1539	-26.7173
37.9728	113.504	-21.5886	-26.9533
37.9728	113.505	-22.0267	-27.1893
37.9728	113.505	-20.2406	-25.576
37.9728	113.505	-16.8625	-22.7711
37.9728	113.505	-13.4634	-19.9661
37.9728	113.505	-12.7002	-19.2945
37.9728	113.505	-11.1481	-17.0626
37.9728	113.505	-9.64434	-14.8308
37.9728	113.505	-8.54226	-13.0982
37.9728	113.506	-8.35668	-12.6989
37.9728	113.506	-8.17902	-12.2996
37.9728	113.506	-8.43526	-12.2358
37.9728	113.506	-9.98508	-13.7342
37.9726	113.499	-0.682574	-4.07422
37.9726	113.499	-1.77619	-4.99141
37.9726	113.499	-3.73533	-7.81115
37.9726	113.499	-5.73098	-10.6309
37.9726	113.499	-7.18089	-12.9287
37.9726	113.499	-6.99083	-12.8516
37.9726	113.5	-8.04194	-13.6706
37.9726	113.5	-11.2394	-15.9599
37.9726	113.5	-16.073	-20.2153
37.9726	113.5	-20.8795	-25.0332
37.9726	113.5	-25.4659	-30.4048
37.9726	113.5	-30.3143	-35.9531
37.9726	113.5	-35.1346	-41.4219
37.9726	113.5	-38.4926	-45.7213
37.9726	113.501	-40.019	-47.9759
37.9726	113.501	-38.7945	-47.5638
37.9726	113.501	-37.6072	-46.4424
37.9726	113.501	-36.3517	-45.2728
37.9726	113.501	-36.4429	-45.1818
37.9726	113.501	-35.9355	-44.5398
37.9726	113.501	-40.6804	-48.631
37.9726	113.502	-43.684	-51.4187
37.9726	113.502	-45.4042	-52.6799
37.9726	113.502	-43.3445	-50.0431
37.9726	113.502	-38.1111	-44.1584
37.9726	113.502	-33.8648	-39.7955
37.9726	113.502	-33.5749	-39.3172
37.9726	113.502	-33.0034	-38.5755
37.9726	113.503	-36.2679	-41.1139
37.9726	113.503	-37.3753	-42.0865
37.9726	113.503	-37.1108	-41.1344
37.9726	113.503	-36.6147	-39.9825
37.9726	113.503	-37.5694	-40.5244
37.9726	113.503	-39.8967	-43.2952
37.9726	113.503	-40.6322	-44.7092
37.9726	113.503	-36.6048	-40.5717
37.9726	113.504	-29.9511	-33.9974
37.9726	113.504	-24.4901	-28.428
37.9726	113.504	-22.5611	-26.2518
37.9726	113.504	-22.4566	-26.3219
37.9726	113.504	-22.8126	-27.3002
37.9726	113.504	-23.4659	-28.6923
37.9726	113.504	-23.2783	-28.5209
37.9726	113.504	-23.0571	-27.993
37.9726	113.505	-22.8253	-27.4651
37.9726	113.505	-20.5202	-25.461
37.9726	113.505	-18	-23.3429
37.9726	113.505	-15.4541	-21.2248
37.9726	113.505	-14.3927	-20.1558
37.9726	113.505	-12.9058	-18.2298
37.9726	113.505	-11.4211	-16.3038
37.9726	113.505	-10.9726	-15.5853
37.9726	113.506	-10.9473	-15.5134
37.9726	113.506	-10.9001	-15.4416
37.9726	113.506	-11.1069	-15.4889
37.9726	113.506	-12.1845	-16.6047
37.9726	113.506	-13.1423	-17.4832
37.9726	113.506	-16.2595	-20.4106
37.9725	113.499	-1.99203	-5.93426
37.9725	113.499	-3.55522	-7.40584
37.9725	113.499	-4.7829	-9.52324
37.9725	113.499	-6.05279	-11.6406
37.9725	113.499	-7.52557	-13.8374
37.9725	113.499	-7.95415	-13.996
37.9725	113.5	-9.69238	-15.1229
37.9725	113.5	-12.8928	-17.425
37.9725	113.5	-17.6755	-21.7975
37.9725	113.5	-22.2223	-26.497
37.9725	113.5	-27.0021	-32.1716
37.9725	113.5	-31.7718	-37.9263
37.9725	113.5	-35.8573	-42.8466
37.9725	113.5	-37.3263	-45.2864
37.9725	113.501	-36.9231	-45.4963
37.9725	113.501	-35.3547	-44.6148
37.9725	113.501	-35.2828	-44.4397
37.9725	113.501	-35.1236	-44.1328
37.9725	113.501	-35.7855	-44.5356
37.9725	113.501	-35.5467	-44.319
37.9725	113.501	-38.0574	-46.4293
37.9725	113.501	-42.52	-50.2265
37.9725	113.502	-46.1844	-53.385
37.9725	113.502	-47.3246	-54.2498
37.9725	113.502	-46.6294	-53.146
37.9725	113.502	-36.1997	-41.7497
37.9725	113.502	-34.0479	-39.6354
37.9725	113.502	-35.2826	-40.8526
37.9725	113.503	-39.1649	-43.6343
37.9725	113.503	-38.9359	-43.239
37.9725	113.503	-38.9008	-42.6162
37.9725	113.503	-38.8876	-41.9933
37.9725	113.503	-39.9519	-42.5317
37.9725	113.503	-41.505	-44.7457
37.9725	113.503	-41.856	-45.6231
37.9725	113.503	-38.4064	-42.4067
37.9725	113.504	-33.0099	-36.9435
37.9725	113.504	-28.5592	-32.1829
37.9725	113.504	-26.4204	-29.6109
37.9725	113.504	-25.4493	-28.6813
37.9725	113.504	-24.6678	-28.5952
37.9725	113.504	-24.4566	-29.2529
37.9725	113.504	-24.0707	-28.8926
37.9725	113.504	-23.8936	-28.3229
37.9725	113.505	-23.7277	-27.7531
37.9725	113.505	-21.8564	-26.131
37.9725	113.505	-19.9578	-24.5089
37.9725	113.505	-18.0376	-22.8868
37.9725	113.505	-16.6691	-21.5231
37.9725	113.505	-15.0569	-19.86
37.9725	113.505	-13.5047	-18.3202
37.9725	113.505	-13.5512	-18.4146
37.9725	113.506	-13.7873	-18.7002
37.9725	113.506	-14.3085	-19.2529
37.9725	113.506	-14.9038	-19.7743
37.9725	113.506	-15.9442	-20.9553
37.9725	113.506	-15.8127	-20.7112
37.9725	113.506	-16.6445	-21.0125
37.9725	113.506	-17.0416	-20.7625
37.9725	113.506	-19.2841	-22.8474
37.9724	113.499	-0.383305	-4.85596
37.9724	113.499	-2.20575	-6.64155
37.9724	113.499	-4.03253	-8.42714
37.9724	113.499	-5.03441	-10.2726
37.9724	113.499	-6.06093	-12.118
37.9724	113.499	-7.78896	-14.3121
37.9724	113.499	-9.21786	-15.0093
37.9724	113.5	-11.7996	-16.7842
37.9724	113.5	-15.1757	-19.5746
37.9724	113.5	-19.3577	-23.7882
37.9724	113.5	-24.0264	-28.6907
37.9724	113.5	-28.6233	-34.1597
37.9724	113.5	-33.1535	-39.7873
37.9724	113.5	-36.1165	-43.6483
37.9724	113.5	-36.4996	-44.9563
37.9724	113.501	-35.3711	-44.3336
37.9724	113.501	-34.1353	-43.711
37.9724	113.501	-34.4265	-43.8753
37.9724	113.501	-36.1957	-44.8446
37.9724	113.501	-36.2021	-44.7938
37.9724	113.501	-37.3925	-45.7837
37.9724	113.502	-47.5775	-54.3879
37.9724	113.502	-48.6249	-55.1156
37.9724	113.502	-49.539	-55.6837
37.9724	113.502	-45.2408	-50.8863
37.9724	113.502	-39.9552	-45.2354
37.9724	113.502	-35.8542	-41.3772
37.9724	113.502	-37.647	-43.2288
37.9724	113.502	-38.6381	-43.5436
37.9724	113.503	-39.5359	-43.8022
37.9724	113.503	-39.3022	-43.0425
37.9724	113.503	-39.6398	-42.9575
37.9724	113.503	-39.7267	-42.576
37.9724	113.503	-40.1537	-42.5977
37.9724	113.503	-39.65	-43.1705
37.9724	113.503	-40.6869	-44.4272
37.9724	113.503	-39.6075	-43.5817
37.9724	113.504	-37.3732	-41.2222
37.9724	113.504	-34.0347	-37.5346
37.9724	113.504	-31.0249	-34.5555
37.9724	113.504	-29.1382	-32.133
37.9724	113.504	-26.7232	-30.2598
37.9724	113.504	-25.0339	-29.3771
37.9724	113.504	-24.6164	-29.1084
37.9724	113.504	-25.0333	-29.281
37.9724	113.505	-25.4326	-29.4535
37.9724	113.505	-23.9951	-28.0296
37.9724	113.505	-22.5213	-26.6058
37.9724	113.505	-21.0416	-25.1819
37.9724	113.505	-19.1437	-23.5654
37.9724	113.505	-17.2166	-21.949
37.9724	113.505	-15.4682	-20.513
37.9724	113.505	-15.9308	-20.9365
37.9724	113.506	-16.3076	-21.3601
37.9724	113.506	-17.7963	-22.7749
37.9724	113.506	-19.2089	-24.1257
37.9724	113.506	-20.5534	-25.4766
37.9724	113.506	-18.4698	-23.027
37.9724	113.506	-16.9498	-20.6942
37.9724	113.506	-15.504	-18.3613
37.9724	113.506	-17.3404	-19.8134
37.9722	113.499	0.0498251	-4.84846
37.9722	113.499	-1.33145	-6.12222
37.9722	113.499	-2.69811	-7.39599
37.9722	113.499	-4.07371	-9.64745
37.9722	113.499	-5.51291	-11.8989
37.9722	113.499	-8.30349	-14.9279
37.9722	113.499	-10.9822	-16.4829
37.9722	113.5	-14.6131	-19.2702
37.9722	113.5	-17.976	-22.5121
37.9722	113.5	-22.0772	-27.0961
37.9722	113.5	-26.8046	-32.168
37.9722	113.5	-31.3922	-37.3891
37.9722	113.5	-35.0519	-41.8721
37.9722	113.5	-37.1626	-44.6349
37.9722	113.5	-37.0202	-45.3672
37.9722	113.501	-36.2978	-45.1102
37.9722	113.501	-35.4957	-44.8532
37.9722	113.501	-37.2704	-46.1112
37.9722	113.501	-38.761	-46.8477
37.9722	113.501	-37.8497	-46.1045
37.9722	113.501	-37.8497	-46.1045
37.9722	113.502	-48.4049	-54.2095
37.9722	113.502	-48.6586	-54.2134
37.9722	113.502	-46.6414	-52.0201
37.9722	113.502	-38.6451	-43.8805
37.9722	113.502	-39.9961	-45.172
37.9722	113.502	-40.0292	-44.8068
37.9722	113.503	-39.8706	-44.0133
37.9722	113.503	-39.26	-42.757
37.9722	113.503	-39.6439	-42.8171
37.9722	113.503	-39.0879	-41.9505
37.9722	113.503	-38.5024	-41.0839
37.9722	113.503	-37.7929	-40.8046
37.9722	113.503	-38.8493	-42.4806
37.9722	113.503	-39.4076	-43.3975
37.9722	113.504	-39.2988	-43.1727
37.9722	113.504	-37.6282	-41.1616
37.9722	113.504	-35.79	-39.0394
37.9722	113.504	-32.355	-35.9054
37.9722	113.504	-28.7471	-32.2479
37.9722	113.504	-25.396	-29.4606
37.9722	113.504	-25.0757	-29.5627
37.9722	113.504	-26.5489	-31.0583
37.9722	113.505	-28.0206	-32.554
37.9722	113.505	-26.6885	-30.9097
37.9722	113.505	-25.2298	-29.2655
37.9722	113.505	-23.7747	-27.6212
37.9722	113.505	-21.4301	-25.704
37.9722	113.505	-19.0156	-23.7868
37.9722	113.505	-16.9483	-22.1382
37.9722	113.505	-17.4616	-22.5259
37.9722	113.506	-17.9334	-22.9135
37.9722	113.506	-20.9098	-25.6464
37.9722	113.506	-23.7248	-28.3201
37.9722	113.506	-26.4901	-30.9937
37.9722	113.506	-23.3418	-27.6434
37.9722	113.506	-19.5331	-22.7783
37.9722	113.506	-15.9374	-17.9132
37.9722	113.506	-17.2229	-18.5135
37.9722	113.507	-17.6352	-18.7737
37.9722	113.507	-23.759	-25.9456
37.9722	113.507	-23.451	-25.691
37.9721	113.499	0.21439	-5.05912
37.9721	113.499	-0.562672	-5.65379
37.9721	113.499	-1.34064	-6.24847
37.9721	113.499	-2.9985	-8.66964
37.9721	113.499	-4.74491	-11.0908
37.9721	113.499	-8.45909	-14.8644
37.9721	113.499	-12.2565	-17.5693
37.9721	113.5	-17.1921	-21.8753
37.9721	113.5	-21.508	-26.43
37.9721	113.5	-25.6335	-31.1219
37.9721	113.5	-30.3075	-36.0095
37.9721	113.5	-34.251	-40.3627
37.9721	113.5	-37.5222	-44.2929
37.9721	113.5	-39.2343	-46.4263
37.9721	113.5	-38.7776	-46.6817
37.9721	113.501	-38.556	-46.7883
37.9721	113.501	-38.2556	-46.8949
37.9721	113.501	-40.607	-48.6596
37.9721	113.501	-40.7172	-48.5599
37.9721	113.501	-40.9866	-48.5093
37.9721	113.501	-39.9051	-47.5987
37.9721	113.501	-40.586	-47.8364
37.9721	113.502	-45.8353	-50.6219
37.9721	113.502	-45.8353	-50.6219
37.9721	113.502	-45.8353	-50.6219
37.9721	113.502	-41.6056	-45.9726
37.9721	113.502	-41.6056	-45.9726
37.9721	113.502	-41.3293	-45.5614
37.9721	113.503	-39.2121	-42.4079
37.9721	113.503	-39.2948	-42.351
37.9721	113.503	-38.2808	-41.1281
37.9721	113.503	-37.189	-39.9051
37.9721	113.503	-36.7313	-39.5682
37.9721	113.503	-38.2807	-41.5717
37.9721	113.503	-39.306	-43.1784
37.9721	113.504	-39.5603	-43.4904
37.9721	113.504	-38.8963	-42.435
37.9721	113.504	-37.9555	-41.4689
37.9721	113.504	-35.275	-38.7288
37.9721	113.504	-30.5099	-34.1711
37.9721	113.504	-25.7933	-29.9209
37.9721	113.504	-25.744	-30.2547
37.9721	113.504	-28.204	-32.7135
37.9721	113.505	-30.8824	-35.4048
37.9721	113.505	-29.8747	-34.1276
37.9721	113.505	-28.7156	-32.8504
37.9721	113.505	-27.1011	-31.1359
37.9721	113.505	-25.5988	-29.9978
37.9721	113.505	-24.0373	-28.8597
37.9721	113.505	-21.3327	-26.4597
37.9721	113.505	-20.0943	-25.0942
37.9721	113.506	-18.8532	-23.7288
37.9721	113.506	-23.5772	-28.1569
37.9721	113.506	-28.1661	-32.4838
37.9721	113.506	-32.6364	-36.8107
37.9721	113.506	-29.8801	-33.8871
37.9721	113.506	-18.0711	-19.49
37.9721	113.506	-19.2179	-20.4661
37.9721	113.507	-20.2918	-22.2335
37.9721	113.507	-23.8646	-26.0995
37.9721	113.507	-23.779	-26.0461
37.9721	113.507	-23.6672	-25.9554
37.972	113.499	0.223369	-5.23129
37.972	113.499	-0.283475	-5.62992
37.972	113.499	-0.80122	-6.02854
37.972	113.499	-2.38773	-8.04133
37.972	113.499	-4.00434	-10.0541
37.972	113.499	-7.99239	-13.9806
37.972	113.499	-12.5473	-17.8081
37.972	113.5	-18.9366	-23.8841
37.972	113.5	-25.0583	-30.295
37.972	113.5	-30.4543	-36.0526
37.972	113.5	-34.973	-40.5835
37.972	113.5	-37.8865	-43.681
37.972	113.5	-40.2137	-46.5776
37.972	113.5	-41.6242	-48.4523
37.972	113.5	-41.826	-49.1722
37.972	113.501	-43.068	-50.6765
37.972	113.501	-44.5841	-51.9098
37.972	113.501	-43.7738	-51.1331
37.972	113.501	-42.975	-50.0419
37.972	113.501	-41.5791	-48.5096
37.972	113.501	-42.316	-48.706
37.972	113.501	-42.5301	-48.765
37.972	113.502	-42.5029	-47.1679
37.972	113.502	-42.5577	-47.2716
37.972	113.502	-42.8255	-47.6547
37.972	113.502	-42.4779	-46.2809
37.972	113.502	-42.2863	-45.8516
37.972	113.502	-41.9929	-45.6949
37.972	113.503	-39.5444	-42.4711
37.972	113.503	-39.3968	-42.0411
37.972	113.503	-38.7972	-41.317
37.972	113.503	-38.1067	-40.5928
37.972	113.503	-37.7138	-40.3
37.972	113.503	-37.9413	-41.1626
37.972	113.503	-38.0219	-41.7278
37.972	113.504	-37.8303	-41.5626
37.972	113.504	-37.8407	-41.4531
37.972	113.504	-38.3898	-42.128
37.972	113.504	-37.1274	-40.7824
37.972	113.504	-32.956	-36.6304
37.972	113.504	-27.9978	-31.9915
37.972	113.504	-27.7766	-31.7508
37.972	113.504	-30.0472	-33.8296
37.972	113.505	-32.7671	-36.5534
37.972	113.505	-32.7796	-36.6492
37.972	113.505	-32.6788	-36.7451
37.972	113.505	-31.3242	-35.5818
37.972	113.505	-30.0353	-34.588
37.972	113.505	-28.7454	-33.5942
37.972	113.505	-25.2797	-30.241
37.972	113.505	-22.5132	-27.3116
37.972	113.506	-19.8413	-24.3823
37.972	113.506	-25.5766	-29.9139
37.972	113.506	-31.0679	-35.2025
37.972	113.506	-36.4036	-40.4912
37.972	113.506	-36.0928	-40.1578
37.972	113.506	-23.0876	-25.4039
37.972	113.506	-21.1276	-23.3146
37.972	113.507	-22.4083	-25.648
37.972	113.507	-22.8015	-26.348
37.972	113.507	-24.6997	-26.9163
37.972	113.507	-24.6219	-26.9832
37.972	113.507	-24.4759	-27.243
37.9719	113.499	0.348731	-5.14683
37.9719	113.499	-0.384067	-5.9997
37.9719	113.499	-1.11085	-6.85257
37.9719	113.499	-2.39049	-8.22276
37.9719	113.499	-4.42732	-10.2823
37.9719	113.499	-8.30144	-14.005
37.9719	113.499	-13.7866	-19.1235
37.9719	113.5	-20.596	-25.8791
37.9719	113.5	-27.9229	-33.3853
37.9719	113.5	-33.6349	-39.187
37.9719	113.5	-38.1426	-43.581
37.9719	113.5	-40.5341	-46.0207
37.9719	113.5	-42.46	-48.4575
37.9719	113.5	-43.4244	-49.9753
37.9719	113.5	-44.2089	-51.2898
37.9719	113.501	-46.0435	-52.953
37.9719	113.501	-47.7237	-54.6162
37.9719	113.501	-48.5719	-55.3905
37.9719	113.501	-48.1671	-54.8181
37.9719	113.501	-44.3185	-50.3597
37.9719	113.501	-43.7668	-49.6296
37.9719	113.501	-45.0009	-50.7862
37.9719	113.502	-42.6921	-47.6531
37.9719	113.502	-41.4918	-46.3745
37.9719	113.502	-42.2264	-47.3081
37.9719	113.502	-42.5917	-47.117
37.9719	113.502	-42.606	-46.5401
37.9719	113.502	-42.2056	-45.6061
37.9719	113.502	-41.6806	-45.384
37.9719	113.503	-41.0282	-44.2798
37.9719	113.503	-40.3426	-43.1755
37.9719	113.503	-40.171	-42.5504
37.9719	113.503	-39.8495	-42.2609
37.9719	113.503	-39.603	-41.9713
37.9719	113.503	-39.1629	-41.7465
37.9719	113.503	-38.3997	-41.8758
37.9719	113.503	-38.5279	-41.8082
37.9719	113.504	-37.6318	-41.1356
37.9719	113.504	-37.7213	-41.4694
37.9719	113.504	-39.2291	-43.071
37.9719	113.504	-39.4184	-43.0154
37.9719	113.504	-36.3834	-39.691
37.9719	113.504	-32.0586	-35.2956
37.9719	113.504	-31.081	-34.0453
37.9719	113.504	-32.2511	-34.9927
37.9719	113.505	-34.0101	-36.7828
37.9719	113.505	-34.8815	-38.0351
37.9719	113.505	-35.8392	-39.2874
37.9719	113.505	-35.05	-38.9789
37.9719	113.505	-34.4858	-38.722
37.9719	113.505	-33.9236	-38.465
37.9719	113.505	-29.958	-34.4352
37.9719	113.505	-25.6314	-29.9444
37.9719	113.506	-21.431	-25.4537
37.9719	113.506	-25.8238	-29.8222
37.9719	113.506	-31.738	-35.7041
37.9719	113.506	-37.5185	-41.5861
37.9719	113.506	-36.644	-40.6918
37.9719	113.506	-33.3461	-36.9887
37.9719	113.506	-22.7842	-26.307
37.9719	113.507	-23.6956	-27.8398
37.9719	113.507	-23.6884	-27.784
37.9719	113.507	-24.789	-27.2588
37.9719	113.507	-24.896	-27.6548
37.9719	113.507	-24.5605	-27.999
37.9719	113.507	-24.1452	-28.3431
37.9719	113.507	-23.8546	-28.6012
37.9717	113.499	1.23903	-4.03751
37.9717	113.499	0.312559	-5.26989
37.9717	113.499	-0.59411	-6.50227
37.9717	113.499	-1.50942	-7.73465
37.9717	113.499	-2.64853	-8.82557
37.9717	113.499	-4.53371	-10.6058
37.9717	113.499	-9.64523	-15.3469
37.9717	113.499	-16.2482	-21.6054
37.9717	113.5	-23.8716	-29.2318
37.9717	113.5	-29.9554	-35.5615
37.9717	113.5	-35.8105	-41.51
37.9717	113.5	-40.1583	-45.7979
37.9717	113.5	-43.0175	-48.5523
37.9717	113.5	-44.1647	-50.1058
37.9717	113.5	-44.7005	-51.2628
37.9717	113.5	-45.1646	-52.4029
37.9717	113.501	-47.453	-54.3878
37.9717	113.501	-49.5748	-56.2943
37.9717	113.501	-51.5528	-57.9304
37.9717	113.501	-51.9607	-57.8857
37.9717	113.501	-49.6691	-55.2944
37.9717	113.501	-47.5558	-53.0164
37.9717	113.501	-45.7771	-51.4179
37.9717	113.501	-47.3751	-53.0293
37.9717	113.502	-46.5903	-52.0896
37.9717	113.502	-42.3237	-47.3992
37.9717	113.502	-42.7211	-47.9167
37.9717	113.502	-42.5349	-47.281
37.9717	113.502	-41.4828	-45.2097
37.9717	113.502	-41.1676	-45.021
37.9717	113.503	-41.1686	-44.5718
37.9717	113.503	-41.1294	-44.1226
37.9717	113.503	-41.2065	-43.7227
37.9717	113.503	-40.384	-42.9484
37.9717	113.503	-39.5174	-42.174
37.9717	113.503	-39.0484	-42.0356
37.9717	113.503	-40.0002	-43.3076
37.9717	113.503	-40.3642	-43.9207
37.9717	113.504	-39.5741	-43.2766
37.9717	113.504	-39.2049	-42.9151
37.9717	113.504	-40.4553	-44.131
37.9717	113.504	-41.2235	-44.5473
37.9717	113.504	-39.8208	-42.6245
37.9717	113.504	-37.2888	-39.7832
37.9717	113.504	-35.3159	-37.9583
37.9717	113.504	-35.3871	-37.5541
37.9717	113.505	-35.4639	-37.7429
37.9717	113.505	-36.4066	-38.9289
37.9717	113.505	-37.4512	-40.1149
37.9717	113.505	-37.2732	-40.3961
37.9717	113.505	-36.5151	-40.0843
37.9717	113.505	-35.7528	-39.7726
37.9717	113.505	-31.9289	-35.9421
37.9717	113.505	-28.137	-32.1116
37.9717	113.506	-24.4273	-28.2812
37.9717	113.506	-26.5224	-30.3735
37.9717	113.506	-36.5078	-40.7097
37.9717	113.506	-35.8485	-40.1413
37.9717	113.506	-35.744	-40.042
37.9717	113.506	-24.0494	-28.4158
37.9717	113.507	-23.9583	-28.2327
37.9717	113.507	-23.6373	-27.6225
37.9717	113.507	-23.8181	-27.4323
37.9717	113.507	-24.4743	-28.7621
37.9717	113.507	-24.2615	-29.0232
37.9717	113.507	-24.155	-29.0901
37.9716	113.499	0.67834	-4.97028
37.9716	113.499	0.0667051	-5.85713
37.9716	113.499	-0.549096	-6.74398
37.9716	113.499	-1.33068	-7.80999
37.9716	113.499	-2.57336	-9.06524
37.9716	113.499	-5.52274	-11.8555
37.9716	113.499	-11.0558	-16.934
37.9716	113.499	-18.2484	-23.6895
37.9716	113.5	-25.3518	-30.8024
37.9716	113.5	-30.2214	-36.0541
37.9716	113.5	-36.2058	-42.2435
37.9716	113.5	-40.9188	-46.8317
37.9716	113.5	-45.0784	-50.8137
37.9716	113.5	-45.7742	-51.9949
37.9716	113.5	-46.0645	-52.885
37.9716	113.5	-46.3522	-53.7752
37.9716	113.501	-48.1653	-55.2391
37.9716	113.501	-50.6401	-57.1708
37.9716	113.501	-52.9588	-58.822
37.9716	113.501	-52.8146	-58.3494
37.9716	113.501	-51.3243	-56.74
37.9716	113.501	-48.4206	-53.924
37.9716	113.501	-49.1156	-54.6425
37.9716	113.502	-49.3851	-54.7604
37.9716	113.502	-43.8612	-48.8519
37.9716	113.502	-42.4434	-47.4366
37.9716	113.502	-41.825	-46.5888
37.9716	113.502	-41.4336	-45.7083
37.9716	113.502	-41.0276	-44.8279
37.9716	113.502	-41.0818	-44.6649
37.9716	113.503	-41.2216	-44.5575
37.9716	113.503	-41.2828	-44.4501
37.9716	113.503	-41.3887	-44.3426
37.9716	113.503	-40.9453	-43.8629
37.9716	113.503	-40.4419	-43.3831
37.9716	113.503	-40.9734	-44.2104
37.9716	113.503	-43.1837	-46.8248
37.9716	113.503	-44.6226	-48.4424
37.9716	113.504	-43.8863	-47.6024
37.9716	113.504	-42.223	-45.6949
37.9716	113.504	-41.6056	-45.0239
37.9716	113.504	-42.0545	-45.1989
37.9716	113.504	-42.3757	-44.8297
37.9716	113.504	-42.257	-44.2208
37.9716	113.504	-41.0813	-43.1923
37.9716	113.504	-40.1076	-42.4683
37.9716	113.505	-39.4139	-41.9608
37.9716	113.505	-39.8849	-42.3938
37.9716	113.505	-40.4182	-42.8267
37.9716	113.505	-39.8233	-42.7815
37.9716	113.505	-38.9899	-42.5199
37.9716	113.505	-38.2289	-42.2583
37.9716	113.505	-34.8822	-38.9983
37.9716	113.505	-31.597	-35.7383
37.9716	113.506	-28.3415	-32.4783
37.9716	113.506	-28.3415	-32.4783
37.9716	113.506	-35.8603	-40.5309
37.9716	113.506	-35.8603	-40.5309
37.9716	113.506	-35.8603	-40.5309
37.9716	113.507	-23.6728	-27.4953
37.9716	113.507	-23.5416	-27.1195
37.9716	113.507	-23.813	-27.2445
37.9716	113.507	-24.7314	-30.0678
37.9716	113.507	-24.7314	-30.0678
37.9716	113.507	-24.7314	-30.0678
37.9716	113.508	-23.0997	-27.8657
37.9715	113.499	0.659323	-5.60242
37.9715	113.499	0.315726	-6.06721
37.9715	113.499	-0.0446054	-6.532
37.9715	113.499	-0.685189	-7.28511
37.9715	113.499	-1.97124	-8.61377
37.9715	113.499	-5.01299	-11.5117
37.9715	113.499	-11.1237	-17.1074
37.9715	113.499	-17.5303	-23.1084
37.9715	113.5	-24.1488	-29.6791
37.9715	113.5	-28.384	-34.2878
37.9715	113.5	-37.7841	-44.1756
37.9715	113.5	-42.2067	-48.6091
37.9715	113.5	-45.5558	-52.0574
37.9715	113.5	-46.2078	-53.0115
37.9715	113.5	-46.9829	-54.0481
37.9715	113.5	-47.6983	-55.0847
37.9715	113.501	-49.0053	-55.9514
37.9715	113.501	-52.3985	-57.9883
37.9715	113.501	-52.2501	-57.6841
37.9715	113.501	-51.7434	-57.1791
37.9715	113.501	-51.1763	-56.5947
37.9715	113.501	-50.2128	-55.5935
37.9715	113.501	-49.8507	-55.1502
37.9715	113.502	-49.8705	-54.9528
37.9715	113.502	-48.7879	-53.8627
37.9715	113.502	-41.3696	-46.098
37.9715	113.502	-40.9138	-45.4745
37.9715	113.502	-40.945	-45.056
37.9715	113.502	-40.4225	-44.1797
37.9715	113.502	-40.0636	-43.4918
37.9715	113.503	-39.4299	-42.944
37.9715	113.503	-39.7135	-43.1817
37.9715	113.503	-39.9853	-43.4195
37.9715	113.503	-42.2093	-45.2607
37.9715	113.503	-43.925	-46.7743
37.9715	113.503	-45.9431	-49.4282
37.9715	113.503	-48.1727	-51.7088
37.9715	113.503	-49.0844	-52.8694
37.9715	113.504	-48.3884	-51.9695
37.9715	113.504	-46.4274	-49.5588
37.9715	113.504	-44.8812	-47.8978
37.9715	113.504	-44.9402	-47.6305
37.9715	113.504	-46.6901	-48.207
37.9715	113.504	-47.5469	-49.1538
37.9715	113.504	-47.3685	-49.2668
37.9715	113.504	-46.7187	-48.9063
37.9715	113.505	-45.9875	-48.6536
37.9715	113.505	-46.1912	-48.8693
37.9715	113.505	-46.4185	-49.0851
37.9715	113.505	-45.0117	-48.1152
37.9715	113.505	-43.2989	-47.0376
37.9715	113.505	-41.4959	-45.9599
37.9715	113.505	-38.0913	-42.7031
37.9715	113.505	-35.3779	-40.1649
37.9715	113.506	-32.72	-37.6267
37.9715	113.506	-34.814	-40.1504
37.9715	113.506	-36.9949	-42.274
37.9715	113.506	-35.6493	-40.6578
37.9715	113.506	-34.5952	-39.6767
37.9715	113.507	-23.7453	-27.0883
37.9715	113.507	-23.8949	-27.1836
37.9715	113.507	-24.4045	-27.5013
37.9715	113.507	-24.5525	-27.5966
37.9715	113.507	-24.8858	-30.3408
37.9715	113.507	-24.7412	-30.1059
37.9715	113.507	-23.9852	-28.6992
37.9715	113.508	-24.3306	-28.1643
37.9714	113.499	1.94564	-4.7447
37.9714	113.499	1.3269	-5.43594
37.9714	113.499	0.695324	-6.12719
37.9714	113.499	-0.864585	-7.69057
37.9714	113.499	-2.70496	-9.3873
37.9714	113.499	-6.84171	-13.195
37.9714	113.499	-11.7264	-17.723
37.9714	113.499	-16.6241	-22.3916
37.9714	113.5	-24.5448	-30.031
37.9714	113.5	-44.131	-50.7935
37.9714	113.5	-45.0456	-52.0091
37.9714	113.5	-45.5714	-52.6686
37.9714	113.5	-47.3458	-54.3587
37.9714	113.5	-49.0617	-56.0488
37.9714	113.501	-49.8968	-56.42
37.9714	113.501	-50.6412	-56.813
37.9714	113.501	-52.5013	-57.8914
37.9714	113.501	-52.3294	-57.7437
37.9714	113.501	-51.9796	-57.3758
37.9714	113.501	-49.1884	-54.1964
37.9714	113.502	-49.0702	-53.9442
37.9714	113.502	-49.11	-53.9222
37.9714	113.502	-40.0596	-44.659
37.9714	113.502	-40.0596	-44.659
37.9714	113.502	-40.3024	-44.5639
37.9714	113.502	-38.8774	-42.8761
37.9714	113.502	-37.479	-41.1883
37.9714	113.503	-36.9717	-40.8112
37.9714	113.503	-38.5714	-42.2131
37.9714	113.503	-40.1406	-43.615
37.9714	113.503	-44.4623	-47.4021
37.9714	113.503	-47.8211	-50.4403
37.9714	113.503	-50.7382	-54.0555
37.9714	113.503	-51.3348	-55.2094
37.9714	113.503	-51.8599	-55.8862
37.9714	113.504	-51.9449	-55.5085
37.9714	113.504	-51.0179	-54.1683
37.9714	113.504	-49.9502	-52.9197
37.9714	113.504	-50.7308	-52.7224
37.9714	113.504	-51.9309	-53.4847
37.9714	113.504	-52.9941	-54.6324
37.9714	113.504	-53.7066	-55.7785
37.9714	113.504	-53.7935	-56.3507
37.9714	113.505	-53.7427	-56.8438
37.9714	113.505	-53.4357	-56.7263
37.9714	113.505	-53.1933	-56.6087
37.9714	113.505	-50.8131	-54.6855
37.9714	113.505	-48.1061	-52.3755
37.9714	113.505	-45.2432	-50.0655
37.9714	113.505	-41.7394	-46.7414
37.9714	113.505	-39.3509	-44.8186
37.9714	113.506	-37.1156	-42.8959
37.9714	113.506	-39.7843	-46.1298
37.9714	113.506	-39.4879	-45.5604
37.9714	113.506	-37.3584	-43.0867
37.9714	113.506	-34.2308	-39.4835
37.9714	113.506	-32.6862	-37.9981
37.9714	113.506	-32.2252	-37.5525
37.9714	113.507	-24.8458	-27.9035
37.9714	113.507	-25.2389	-28.1735
37.9714	113.507	-25.2947	-28.2088
37.9714	113.507	-24.1165	-28.9974
37.9714	113.507	-23.7709	-28.3631
37.9714	113.507	-22.5183	-26.249
37.9714	113.508	-22.1533	-25.6147
37.9714	113.508	-26.5119	-29.2191
37.9714	113.508	-26.5119	-29.2191
37.9712	113.499	4.00082	-2.69693
37.9712	113.499	2.73803	-3.82133
37.9712	113.499	0.924404	-5.6144
37.9712	113.499	-2.07123	-8.49297
37.9712	113.499	-4.99803	-11.3011
37.9712	113.499	-9.1701	-15.3072
37.9712	113.499	-13.8298	-19.853
37.9712	113.499	-17.0628	-23.1035
37.9712	113.5	-26.8008	-32.3426
37.9712	113.5	-36.5698	-42.1319
37.9712	113.5	-47.5825	-53.9663
37.9712	113.5	-46.0286	-52.7624
37.9712	113.5	-44.6525	-51.8261
37.9712	113.5	-45.1764	-52.5636
37.9712	113.5	-50.0457	-56.4136
37.9712	113.501	-50.6759	-56.7839
37.9712	113.501	-50.7235	-56.8252
37.9712	113.501	-54.393	-59.5678
37.9712	113.501	-54.393	-59.5678
37.9712	113.501	-54.393	-59.5678
37.9712	113.501	-47.5037	-52.256
37.9712	113.502	-47.5037	-52.256
37.9712	113.502	-47.5037	-52.256
37.9712	113.502	-39.8885	-44.6373
37.9712	113.502	-40.0059	-44.7763
37.9712	113.502	-41.0009	-45.4513
37.9712	113.502	-36.3041	-40.5056
37.9712	113.503	-35.4659	-39.6794
37.9712	113.503	-38.9606	-42.6621
37.9712	113.503	-42.4385	-45.6448
37.9712	113.503	-47.0475	-49.8035
37.9712	113.503	-49.5792	-52.1989
37.9712	113.503	-52.2127	-55.0495
37.9712	113.503	-52.2868	-55.9599
37.9712	113.503	-53.6257	-57.5736
37.9712	113.504	-55.3471	-59.205
37.9712	113.504	-56.6405	-60.1246
37.9712	113.504	-57.2296	-60.0841
37.9712	113.504	-57.4547	-59.9665
37.9712	113.504	-58.2982	-60.5013
37.9712	113.504	-59.0197	-61.2927
37.9712	113.504	-59.962	-62.6819
37.9712	113.504	-60.5206	-63.6755
37.9712	113.505	-60.7835	-64.5539
37.9712	113.505	-59.4115	-63.4513
37.9712	113.505	-58.0268	-62.3486
37.9712	113.505	-54.5099	-59.2646
37.9712	113.505	-51.3383	-56.172
37.9712	113.505	-48.0822	-53.0795
37.9712	113.505	-45.0606	-50.0779
37.9712	113.506	-40.897	-47.3841
37.9712	113.506	-42.8474	-49.6593
37.9712	113.506	-42.3143	-48.8319
37.9712	113.506	-32.2738	-37.5496
37.9712	113.506	-31.2756	-36.5578
37.9712	113.506	-31.3344	-36.5223
37.9712	113.507	-26.0781	-28.9883
37.9712	113.507	-26.0781	-28.9883
37.9712	113.507	-26.0781	-28.9883
37.9712	113.507	-22.669	-26.1266
37.9712	113.507	-21.9116	-24.7555
37.9712	113.508	-21.7778	-24.5206
37.9712	113.508	-24.8571	-26.8285
37.9712	113.508	-24.7016	-26.7352
37.9711	113.499	5.92227	-0.405669
37.9711	113.499	3.83042	-2.13979
37.9711	113.499	0.457271	-5.26152
37.9711	113.499	-4.48928	-10.0086
37.9711	113.499	-8.62992	-14.2422
37.9711	113.499	-12.905	-18.7589
37.9711	113.499	-17.2893	-23.1402
37.9711	113.499	-20.142	-26.1201
37.9711	113.5	-30.8182	-36.4333
37.9711	113.5	-39.4741	-45.2566
37.9711	113.5	-47.1912	-53.5166
37.9711	113.5	-46.3352	-53.1106
37.9711	113.5	-45.3465	-52.7045
37.9711	113.5	-45.6144	-53.5484
37.9711	113.5	-48.0349	-55.0602
37.9711	113.5	-50.3369	-56.572
37.9711	113.501	-50.8787	-56.8932
37.9711	113.501	-50.8787	-56.8932
37.9711	113.501	-57.2442	-62.1154
37.9711	113.501	-57.4125	-62.2948
37.9711	113.501	-58.6822	-63.5662
37.9711	113.501	-49.3017	-53.8888
37.9711	113.502	-47.0326	-51.5994
37.9711	113.502	-48.5129	-52.9681
37.9711	113.502	-43.0779	-47.6434
37.9711	113.502	-41.2028	-45.8776
37.9711	113.502	-42.5378	-47.1287
37.9711	113.502	-39.8666	-44.3842
37.9711	113.502	-37.1141	-41.6397
37.9711	113.503	-37.5582	-41.6642
37.9711	113.503	-42.7579	-46.1446
37.9711	113.503	-47.3949	-50.1643
37.9711	113.503	-49.1701	-51.8033
37.9711	113.503	-48.5723	-51.4415
37.9711	113.503	-50.2036	-53.2806
37.9711	113.503	-52.4109	-55.9155
37.9711	113.503	-56.1533	-60.0798
37.9711	113.504	-60.1689	-64.1527
37.9711	113.504	-63.0115	-66.7521
37.9711	113.504	-63.7997	-67.2433
37.9711	113.504	-63.4323	-66.7023
37.9711	113.504	-64.2251	-67.3564
37.9711	113.504	-65.3679	-68.5891
37.9711	113.504	-65.4736	-68.9976
37.9711	113.504	-64.9629	-68.7898
37.9711	113.505	-64.1485	-68.3778
37.9711	113.505	-61.7632	-66.3133
37.9711	113.505	-59.3516	-64.2488
37.9711	113.505	-55.6278	-60.8804
37.9711	113.505	-52.9284	-58.0258
37.9711	113.505	-50.1423	-55.1712
37.9711	113.505	-49.4508	-54.5513
37.9711	113.506	-45.8501	-52.4118
37.9711	113.506	-44.6853	-51.3285
37.9711	113.506	-44.6853	-51.3285
37.9711	113.506	-30.9391	-36.1143
37.9711	113.506	-31.0854	-36.2004
37.9711	113.506	-31.491	-36.4872
37.9711	113.506	-31.6187	-36.5733
37.9711	113.507	-26.7724	-29.7574
37.9711	113.507	-26.7724	-29.7574
37.9711	113.507	-26.7724	-29.7574
37.9711	113.507	-22.7504	-25.2923
37.9711	113.507	-22.7504	-25.2923
37.9711	113.508	-22.7504	-25.2923
37.9711	113.508	-22.2264	-23.8783
37.9711	113.508	-22.2264	-23.8783
37.9711	113.508	-21.9899	-23.74
37.971	113.498	6.85087	0.603167
37.971	113.499	6.35694	0.702318
37.971	113.499	3.37454	-1.59818
37.971	113.499	-1.25237	-5.85281
37.971	113.499	-6.95829	-11.399
37.971	113.499	-11.4604	-16.3346
37.971	113.499	-15.5678	-21.0007
37.971	113.499	-20.5881	-26.14
37.971	113.499	-23.8946	-29.6696
37.971	113.5	-32.3794	-38.2466
37.971	113.5	-39.0088	-45.0589
37.971	113.5	-45.0665	-51.5895
37.971	113.5	-45.8373	-52.7648
37.971	113.5	-46.5624	-53.9402
37.971	113.5	-47.8308	-55.7024
37.971	113.5	-48.8421	-56.1825
37.971	113.5	-50.096	-56.8956
37.971	113.501	-50.9857	-57.3036
37.971	113.501	-51.5825	-58.0323
37.971	113.501	-58.906	-63.9339
37.971	113.501	-60.1278	-65.004
37.971	113.501	-61.5732	-66.6188
37.971	113.501	-57.4463	-62.1753
37.971	113.501	-52.6897	-57.1571
37.971	113.502	-48.6826	-53.0406
37.971	113.502	-50.871	-55.164
37.971	113.502	-49.5846	-53.8344
37.971	113.502	-44.3272	-48.7894
37.971	113.502	-45.4602	-49.8655
37.971	113.502	-42.9356	-47.3014
37.971	113.502	-40.3478	-44.7373
37.971	113.503	-40.1098	-44.2041
37.971	113.503	-46.2269	-49.4354
37.971	113.503	-50.5913	-53.2532
37.971	113.503	-50.4075	-53.11
37.971	113.503	-46.8688	-50.0443
37.971	113.503	-49.8011	-53.0933
37.971	113.503	-54.8304	-58.5376
37.971	113.503	-61.5782	-65.7244
37.971	113.504	-65.8184	-69.9905
37.971	113.504	-68.6024	-72.7004
37.971	113.504	-68.9488	-72.9395
37.971	113.504	-68.3241	-72.4081
37.971	113.504	-69.4496	-73.7001
37.971	113.504	-71.3474	-75.7203
37.971	113.504	-69.6883	-74.2513
37.971	113.504	-67.3854	-71.7721
37.971	113.505	-64.8253	-69.2929
37.971	113.505	-62.1772	-66.9417
37.971	113.505	-59.4914	-64.5905
37.971	113.505	-55.8361	-61.337
37.971	113.505	-54.0185	-59.2907
37.971	113.505	-52.0514	-57.2445
37.971	113.505	-51.4743	-56.8034
37.971	113.505	-49.2591	-55.1008
37.971	113.506	-47.2602	-53.3981
37.971	113.506	-45.2198	-51.5602
37.971	113.506	-45.3973	-51.5767
37.971	113.506	-31.7295	-36.6308
37.971	113.506	-32.0575	-36.838
37.971	113.506	-32.0925	-36.8699
37.971	113.507	-27.192	-30.285
37.971	113.507	-27.192	-30.285
37.971	113.507	-27.192	-30.285
37.971	113.507	-25.4747	-28.9245
37.971	113.507	-24.5774	-27.566
37.971	113.508	-25.1044	-27.9901
37.971	113.508	-21.9262	-23.8147
37.971	113.508	-20.1897	-21.8797
37.971	113.508	-20.0562	-21.9064
37.971	113.508	-20.2468	-22.0432
37.9709	113.498	7.0438	1.28743
37.9709	113.499	5.76965	0.836122
37.9709	113.499	1.70684	-2.33852
37.9709	113.499	-3.51736	-7.30342
37.9709	113.499	-9.47516	-13.3944
37.9709	113.499	-13.5023	-18.0544
37.9709	113.499	-17.7773	-22.9316
37.9709	113.499	-23.4724	-28.735
37.9709	113.499	-28.0236	-33.4868
37.9709	113.5	-34.595	-40.5015
37.9709	113.5	-39.1291	-45.4639
37.9709	113.5	-43.4818	-50.4264
37.9709	113.5	-45.8513	-52.8581
37.9709	113.5	-48.1652	-55.2898
37.9709	113.5	-50.4558	-57.7216
37.9709	113.5	-50.3788	-57.4936
37.9709	113.5	-50.9936	-57.9383
37.9709	113.501	-51.5484	-58.3831
37.9709	113.501	-52.4889	-59.4321
37.9709	113.501	-53.7551	-60.2193
37.9709	113.501	-60.9361	-65.9259
37.9709	113.501	-61.7435	-66.8421
37.9709	113.501	-59.6385	-64.5693
37.9709	113.502	-51.2455	-55.5404
37.9709	113.502	-52.6601	-56.9598
37.9709	113.502	-52.896	-57.1957
37.9709	113.502	-49.0409	-53.254
37.9709	113.502	-49.0409	-53.254
37.9709	113.502	-46.0285	-50.226
37.9709	113.502	-42.8648	-47.1979
37.9709	113.503	-42.8708	-46.8765
37.9709	113.503	-49.2493	-52.3961
37.9709	113.503	-53.1451	-55.7908
37.9709	113.503	-51.8252	-54.6093
37.9709	113.503	-48.2382	-51.5426
37.9709	113.503	-53.2263	-56.6447
37.9709	113.503	-60.4564	-64.5659
37.9709	113.503	-68.1096	-72.4666
37.9709	113.504	-71.9802	-76.4581
37.9709	113.504	-73.759	-78.2103
37.9709	113.504	-74.0812	-78.5198
37.9709	113.504	-73.1691	-77.8729
37.9709	113.504	-74.552	-79.6939
37.9709	113.504	-76.6497	-82.0504
37.9709	113.504	-72.7641	-77.8679
37.9709	113.504	-67.8139	-72.5072
37.9709	113.505	-62.8369	-67.1465
37.9709	113.505	-60.6874	-65.2097
37.9709	113.505	-58.5147	-63.2729
37.9709	113.505	-55.7856	-61.0047
37.9709	113.505	-54.535	-59.8313
37.9709	113.505	-53.2646	-58.6579
37.9709	113.505	-52.5665	-58.1283
37.9709	113.505	-50.8991	-56.6324
37.9709	113.506	-48.5239	-54.3299
37.9709	113.506	-45.7138	-51.676
37.9709	113.506	-45.7904	-51.6759
37.9709	113.506	-45.9779	-51.6758
37.9709	113.506	-32.4343	-37.0616
37.9709	113.506	-32.4343	-37.0616
37.9709	113.506	-32.4343	-37.0616
37.9709	113.507	-29.0698	-32.7576
37.9709	113.507	-29.0698	-32.7576
37.9709	113.507	-29.0698	-32.7576
37.9709	113.507	-27.926	-32.5303
37.9709	113.507	-27.6097	-31.9921
37.9709	113.507	-26.4633	-30.198
37.9709	113.508	-26.9394	-30.2514
37.9709	113.508	-25.6989	-28.1491
37.9709	113.508	-25.2973	-27.5748
37.9709	113.508	-22.6153	-24.5694
37.9709	113.508	-21.457	-23.464
37.9709	113.508	-20.3818	-22.353
37.9707	113.498	5.35249	-0.204882
37.9707	113.499	2.46928	-2.08597
37.9707	113.499	-2.85053	-6.31216
37.9707	113.499	-7.47944	-11.0024
37.9707	113.499	-12.6123	-16.3777
37.9707	113.499	-16.3505	-20.551
37.9707	113.499	-20.6988	-25.2793
37.9707	113.499	-26.7542	-31.5753
37.9707	113.499	-31.669	-36.7281
37.9707	113.5	-37.1493	-42.9373
37.9707	113.5	-40.4066	-46.8937
37.9707	113.5	-43.5003	-50.8502
37.9707	113.5	-46.583	-53.6102
37.9707	113.5	-49.7833	-56.5192
37.9707	113.5	-52.9547	-59.4282
37.9707	113.5	-53.3466	-59.5984
37.9707	113.501	-53.3742	-60.0932
37.9707	113.501	-53.4889	-60.4467
37.9707	113.501	-53.7512	-60.4675
37.9707	113.501	-58.997	-63.9651
37.9707	113.501	-59.588	-64.5974
37.9707	113.501	-59.588	-64.5974
37.9707	113.502	-52.6164	-57.0122
37.9707	113.502	-52.6164	-57.0122
37.9707	113.502	-50.8731	-55.1151
37.9707	113.502	-48.2118	-52.3544
37.9707	113.502	-50.0798	-54.1703
37.9707	113.502	-47.4748	-51.6241
37.9707	113.502	-44.7551	-49.0778
37.9707	113.503	-44.5443	-48.7061
37.9707	113.503	-51.361	-54.7365
37.9707	113.503	-55.7679	-58.6643
37.9707	113.503	-55.4718	-58.2917
37.9707	113.503	-53.1685	-56.3421
37.9707	113.503	-58.5768	-62.1815
37.9707	113.503	-66.5391	-70.8024
37.9707	113.503	-73.8748	-78.492
37.9707	113.504	-76.8921	-81.6133
37.9707	113.504	-77.5362	-82.2715
37.9707	113.504	-77.088	-81.8762
37.9707	113.504	-76.2504	-81.2865
37.9707	113.504	-77.494	-83.049
37.9707	113.504	-78.9534	-84.8963
37.9707	113.504	-73.6278	-78.9949
37.9707	113.504	-67.5373	-72.1699
37.9707	113.505	-61.386	-65.3449
37.9707	113.505	-59.6949	-63.8484
37.9707	113.505	-57.9883	-62.3519
37.9707	113.505	-56.0067	-60.8554
37.9707	113.505	-54.9241	-60.0487
37.9707	113.505	-53.8455	-59.2421
37.9707	113.505	-52.687	-58.4355
37.9707	113.505	-51.7805	-57.4699
37.9707	113.506	-45.9081	-51.2954
37.9707	113.506	-46.0537	-51.2319
37.9707	113.506	-46.1027	-51.2318
37.9707	113.506	-33.8347	-38.5955
37.9707	113.506	-33.8347	-38.5955
37.9707	113.506	-33.8347	-38.5955
37.9707	113.507	-32.7826	-37.4167
37.9707	113.507	-32.7826	-37.4167
37.9707	113.507	-32.9725	-37.6145
37.9707	113.507	-30.3383	-35.3472
37.9707	113.507	-29.313	-34.3434
37.9707	113.507	-28.618	-32.9504
37.9707	113.508	-28.1899	-30.856
37.9707	113.508	-28.068	-30.6531
37.9707	113.508	-25.0888	-27.3359
37.9707	113.508	-22.8059	-24.8979
37.9707	113.508	-20.5806	-22.5367
37.9707	113.508	-21.5607	-24.0447
37.9706	113.498	3.30451	-2.25486
37.9706	113.499	-1.98758	-6.32024
37.9706	113.499	-8.97736	-12.3122
37.9706	113.499	-12.4934	-16.1654
37.9706	113.499	-16.5253	-20.5141
37.9706	113.499	-19.502	-23.6396
37.9706	113.499	-23.437	-27.7108
37.9706	113.499	-28.1073	-32.7629
37.9706	113.499	-32.0587	-37.1116
37.9706	113.5	-35.9317	-41.8039
37.9706	113.5	-39.1463	-45.8338
37.9706	113.5	-42.2064	-49.8637
37.9706	113.5	-44.3357	-51.8527
37.9706	113.5	-48.5776	-55.3518
37.9706	113.5	-52.6966	-58.8509
37.9706	113.5	-55.832	-61.51
37.9706	113.5	-55.533	-61.5095
37.9706	113.501	-54.9042	-61.2581
37.9706	113.501	-54.0369	-60.6928
37.9706	113.501	-54.1881	-60.4841
37.9706	113.501	-55.6014	-60.8766
37.9706	113.501	-56.4176	-61.3177
37.9706	113.501	-56.7012	-61.7215
37.9706	113.501	-56.6314	-61.6458
37.9706	113.502	-51.4269	-55.9521
37.9706	113.502	-50.665	-55.1221
37.9706	113.502	-48.0859	-52.2747
37.9706	113.502	-46.3108	-50.5855
37.9706	113.502	-44.4851	-48.8963
37.9706	113.502	-47.6211	-51.7541
37.9706	113.502	-46.8139	-50.9749
37.9706	113.502	-45.9739	-50.1956
37.9706	113.503	-48.1404	-52.1156
37.9706	113.503	-54.7022	-58.0856
37.9706	113.503	-59.6183	-62.5761
37.9706	113.503	-59.4034	-62.272
37.9706	113.503	-59.7058	-62.8454
37.9706	113.503	-64.4314	-68.219
37.9706	113.503	-71.3798	-75.8805
37.9706	113.503	-76.6344	-81.4999
37.9706	113.504	-79.8014	-84.6227
37.9706	113.504	-79.8903	-84.9025
37.9706	113.504	-79.0335	-84.2127
37.9706	113.504	-77.7155	-83.1709
37.9706	113.504	-78.3757	-84.1151
37.9706	113.504	-79.0534	-85.0593
37.9706	113.504	-73.2415	-78.4788
37.9706	113.504	-66.833	-71.2267
37.9706	113.505	-60.4012	-63.9746
37.9706	113.505	-58.9814	-62.7609
37.9706	113.505	-57.5175	-61.618
37.9706	113.505	-55.9396	-60.475
37.9706	113.505	-54.6998	-59.6042
37.9706	113.505	-53.5675	-58.8243
37.9706	113.505	-52.5755	-58.0444
37.9706	113.505	-52.4744	-57.904
37.9706	113.506	-46.4119	-51.3363
37.9706	113.506	-45.4291	-50.344
37.9706	113.506	-45.4291	-50.344
37.9706	113.506	-36.4087	-41.519
37.9706	113.506	-36.4087	-41.519
37.9706	113.506	-37.492	-42.7959
37.9706	113.507	-39.1175	-44.0765
37.9706	113.507	-37.4369	-42.6688
37.9706	113.507	-36.6737	-41.5728
37.9706	113.507	-34.1841	-39.2212
37.9706	113.507	-32.4023	-37.2569
37.9706	113.507	-31.1065	-36.2275
37.9706	113.507	-30.6936	-35.1174
37.9706	113.508	-29.8337	-33.2661
37.9706	113.508	-29.8142	-32.5955
37.9706	113.508	-29.4937	-32.2496
37.9706	113.508	-26.2013	-28.6001
37.9706	113.508	-22.9297	-24.9643
37.9706	113.508	-21.0328	-23.0301
37.9706	113.508	-22.3107	-25.0168
37.9706	113.508	-23.5062	-26.8964
37.9705	113.498	2.07984	-3.59657
37.9705	113.499	-5.55624	-10.0888
37.9705	113.499	-14.1385	-17.9113
37.9705	113.499	-16.2995	-20.5721
37.9705	113.499	-19.2669	-23.7888
37.9705	113.499	-22.0757	-26.4392
37.9705	113.499	-25.1358	-29.3368
37.9705	113.499	-27.427	-32.2674
37.9705	113.499	-28.9086	-34.4341
37.9705	113.5	-30.7267	-36.9201
37.9705	113.5	-34.3973	-41.2593
37.9705	113.5	-37.534	-45.5985
37.9705	113.5	-39.923	-48.2173
37.9705	113.5	-45.7289	-52.8932
37.9705	113.5	-51.0735	-57.2659
37.9705	113.5	-56.0626	-61.6108
37.9705	113.5	-55.0408	-60.7942
37.9705	113.501	-53.4886	-59.3608
37.9705	113.501	-53.7321	-59.4244
37.9705	113.501	-54.5699	-59.5894
37.9705	113.501	-55.142	-59.9915
37.9705	113.501	-55.3779	-60.4457
37.9705	113.501	-55.5649	-60.6403
37.9705	113.501	-52.942	-57.6912
37.9705	113.502	-50.2264	-54.7421
37.9705	113.502	-48.2731	-52.6788
37.9705	113.502	-46.4046	-50.3092
37.9705	113.502	-44.5655	-48.7047
37.9705	113.502	-42.9113	-47.3751
37.9705	113.502	-45.5	-49.7617
37.9705	113.502	-46.4967	-50.7447
37.9705	113.502	-48.2904	-52.3309
37.9705	113.503	-52.9093	-56.4781
37.9705	113.503	-59.2462	-62.3757
37.9705	113.503	-63.4634	-66.392
37.9705	113.503	-62.951	-65.8974
37.9705	113.503	-64.8033	-68.1486
37.9705	113.503	-68.999	-73.1224
37.9705	113.503	-74.8174	-79.5831
37.9705	113.503	-78.1861	-83.0697
37.9705	113.504	-80.1079	-84.8367
37.9705	113.504	-79.7968	-84.7402
37.9705	113.504	-78.5007	-83.7603
37.9705	113.504	-77.3055	-82.8841
37.9705	113.504	-77.0404	-82.636
37.9705	113.504	-76.7522	-82.3879
37.9705	113.504	-72.1248	-77.1175
37.9705	113.504	-66.2452	-70.4694
37.9705	113.505	-60.3024	-63.8213
37.9705	113.505	-58.0336	-61.5766
37.9705	113.505	-56.7882	-60.6746
37.9705	113.505	-55.3929	-59.7727
37.9705	113.505	-54.0541	-58.9129
37.9705	113.505	-53.2243	-58.3258
37.9705	113.505	-52.4906	-57.7387
37.9705	113.505	-52.3434	-57.5408
37.9705	113.506	-49.5961	-54.5481
37.9705	113.506	-46.4654	-51.5554
37.9705	113.506	-44.9248	-49.6439
37.9705	113.506	-44.9248	-49.6439
37.9705	113.506	-38.7499	-44.0796
37.9705	113.506	-38.7499	-44.0796
37.9705	113.506	-40.6538	-45.6741
37.9705	113.507	-42.0077	-46.9042
37.9705	113.507	-43.0647	-48.1343
37.9705	113.507	-41.6919	-46.5855
37.9705	113.507	-38.7413	-43.3759
37.9705	113.507	-35.4188	-39.909
37.9705	113.507	-33.7825	-38.3436
37.9705	113.507	-32.8655	-37.6246
37.9705	113.508	-29.927	-33.2431
37.9705	113.508	-29.9495	-32.9646
37.9705	113.508	-29.1385	-32.0122
37.9705	113.508	-23.3924	-25.4517
37.9705	113.508	-22.2369	-24.6026
37.9705	113.508	-23.1916	-26.3092
37.9705	113.508	-24.0008	-28.0087
37.9704	113.498	1.10835	-4.88508
37.9704	113.499	-7.67098	-12.5653
37.9704	113.499	-16.8054	-21.083
37.9704	113.499	-17.887	-22.7582
37.9704	113.499	-20.1113	-25.296
37.9704	113.499	-22.7983	-27.8587
37.9704	113.499	-25.5808	-30.3727
37.9704	113.499	-26.523	-31.8485
37.9704	113.499	-26.437	-32.4618
37.9704	113.5	-26.5146	-32.9186
37.9704	113.5	-30.0215	-37.1517
37.9704	113.5	-33.2096	-41.3847
37.9704	113.5	-35.6288	-44.4186
37.9704	113.5	-40.9426	-48.7301
37.9704	113.5	-47.734	-54.2802
37.9704	113.5	-54.942	-60.4681
37.9704	113.5	-53.5361	-59.1034
37.9704	113.501	-53.0116	-58.3035
37.9704	113.501	-52.4776	-57.5036
37.9704	113.501	-52.8524	-57.6527
37.9704	113.501	-53.4037	-58.01
37.9704	113.501	-55.9254	-60.8009
37.9704	113.501	-56.0754	-60.952
37.9704	113.501	-53.7829	-58.2335
37.9704	113.502	-51.4014	-55.5151
37.9704	113.502	-48.8897	-52.7534
37.9704	113.502	-48.2564	-51.5841
37.9704	113.502	-46.9789	-50.4147
37.9704	113.502	-45.8147	-49.6266
37.9704	113.502	-47.3145	-51.0818
37.9704	113.502	-48.1732	-52.537
37.9704	113.502	-52.3969	-56.2457
37.9704	113.503	-58.7036	-61.811
37.9704	113.503	-63.6337	-66.6637
37.9704	113.503	-64.8886	-68.0196
37.9704	113.503	-63.6853	-66.8416
37.9704	113.503	-66.8774	-70.5783
37.9704	113.503	-71.5915	-75.9244
37.9704	113.503	-76.5528	-81.6399
37.9704	113.503	-78.5991	-83.5962
37.9704	113.504	-79.9292	-84.8052
37.9704	113.504	-79.2551	-84.2388
37.9704	113.504	-77.9839	-83.2296
37.9704	113.504	-76.6936	-82.1668
37.9704	113.504	-75.5025	-80.8313
37.9704	113.504	-74.2709	-79.4958
37.9704	113.504	-70.8692	-75.7001
37.9704	113.504	-66.3512	-70.6126
37.9704	113.505	-61.7297	-65.5251
37.9704	113.505	-59.1845	-62.7796
37.9704	113.505	-57.9214	-61.8138
37.9704	113.505	-56.5625	-60.848
37.9704	113.505	-55.1061	-59.8963
37.9704	113.505	-54.1716	-59.0522
37.9704	113.505	-53.2725	-58.2081
37.9704	113.505	-52.4949	-57.4845
37.9704	113.506	-50.094	-54.8357
37.9704	113.506	-47.6051	-52.187
37.9704	113.506	-45.0681	-49.5753
37.9704	113.506	-45.0681	-49.5753
37.9704	113.506	-39.786	-44.8876
37.9704	113.506	-39.786	-44.8876
37.9704	113.506	-41.7593	-46.4765
37.9704	113.507	-42.8037	-47.7212
37.9704	113.507	-43.5916	-48.966
37.9704	113.507	-42.9742	-47.999
37.9704	113.507	-36.7076	-40.9165
37.9704	113.507	-36.2389	-40.3589
37.9704	113.507	-36.2389	-40.3589
37.9704	113.508	-29.6492	-33.1262
37.9704	113.508	-29.6492	-33.1262
37.9704	113.508	-28.4387	-31.6047
37.9704	113.508	-26.1264	-28.7788
37.9704	113.508	-23.6823	-26.0234
37.9704	113.508	-23.1717	-26.2515
37.9704	113.508	-23.2044	-27.2099
37.9704	113.508	-23.3505	-28.116
37.9704	113.509	-23.5729	-28.6321
37.9702	113.498	0.113459	-6.49731
37.9702	113.499	-8.0894	-13.5528
37.9702	113.499	-16.5146	-21.357
37.9702	113.499	-17.3832	-22.8544
37.9702	113.499	-19.6887	-25.6036
37.9702	113.499	-23.028	-28.856
37.9702	113.499	-25.8764	-31.3597
37.9702	113.499	-27.3298	-32.9242
37.9702	113.499	-27.274	-33.2368
37.9702	113.5	-27.5435	-33.5495
37.9702	113.5	-30.3455	-37.0253
37.9702	113.5	-32.7071	-40.5012
37.9702	113.5	-35.4958	-43.9771
37.9702	113.5	-38.6725	-46.6254
37.9702	113.5	-51.2507	-56.9757
37.9702	113.5	-49.9295	-55.7492
37.9702	113.501	-49.9343	-55.3755
37.9702	113.501	-50.0524	-55.0017
37.9702	113.501	-50.4942	-54.9312
37.9702	113.501	-50.4942	-54.9312
37.9702	113.501	-56.7808	-61.2511
37.9702	113.501	-56.7808	-61.2511
37.9702	113.501	-55.516	-59.4671
37.9702	113.502	-54.1771	-57.6831
37.9702	113.502	-52.6548	-55.8991
37.9702	113.502	-51.9636	-54.9063
37.9702	113.502	-50.9815	-53.9135
37.9702	113.502	-50.6747	-53.5879
37.9702	113.502	-51.7425	-54.7144
37.9702	113.502	-52.3338	-55.8658
37.9702	113.502	-56.2419	-59.7671
37.9702	113.503	-60.5601	-64.1861
37.9702	113.503	-64.4759	-68.0042
37.9702	113.503	-64.2308	-67.2767
37.9702	113.503	-64.0476	-67.1253
37.9702	113.503	-67.7535	-71.6319
37.9702	113.503	-72.475	-77.2669
37.9702	113.503	-77.4453	-82.9456
37.9702	113.503	-79.2925	-84.6908
37.9702	113.504	-81.0571	-86.436
37.9702	113.504	-79.0098	-84.2088
37.9702	113.504	-76.6671	-81.8332
37.9702	113.504	-74.2532	-79.4629
37.9702	113.504	-73.229	-78.2737
37.9702	113.504	-72.1428	-77.0845
37.9702	113.504	-70.6764	-75.4291
37.9702	113.504	-67.9251	-72.288
37.9702	113.505	-65.1046	-69.1469
37.9702	113.505	-62.6739	-66.4667
37.9702	113.505	-61.3071	-65.2449
37.9702	113.505	-59.7911	-64.023
37.9702	113.505	-58.2147	-62.8011
37.9702	113.505	-56.4716	-61.0844
37.9702	113.505	-54.7465	-59.3677
37.9702	113.505	-52.9821	-57.6509
37.9702	113.506	-50.5468	-55.0842
37.9702	113.506	-48.5448	-52.9108
37.9702	113.506	-46.4552	-50.7374
37.9702	113.506	-47.8413	-52.0006
37.9702	113.506	-42.8384	-47.0634
37.9702	113.506	-40.9124	-45.3707
37.9702	113.506	-41.9563	-46.2631
37.9702	113.507	-42.62	-47.1555
37.9702	113.507	-42.8842	-48.0479
37.9702	113.507	-42.8842	-48.0479
37.9702	113.507	-37.868	-41.9167
37.9702	113.507	-37.868	-41.9167
37.9702	113.507	-35.843	-39.8619
37.9702	113.508	-27.4601	-31.5334
37.9702	113.508	-28.492	-32.403
37.9702	113.508	-27.5831	-30.9134
37.9702	113.508	-26.6197	-29.4238
37.9702	113.508	-24.8632	-27.6264
37.9702	113.508	-24.0879	-27.8048
37.9702	113.508	-22.9968	-27.8517
37.9702	113.508	-22.3704	-27.9599
37.9702	113.509	-22.0766	-27.7765
37.9701	113.498	-0.479616	-7.7351
37.9701	113.499	-7.77641	-13.9677
37.9701	113.499	-15.6877	-21.1605
37.9701	113.499	-16.9457	-23.081
37.9701	113.499	-20.0737	-26.3506
37.9701	113.499	-23.7351	-30.0093
37.9701	113.499	-26.558	-32.7077
37.9701	113.499	-29.3273	-35.0574
37.9701	113.499	-30.6243	-36.1177
37.9701	113.5	-31.4417	-37.178
37.9701	113.5	-33.084	-39.4301
37.9701	113.5	-34.4701	-41.494
37.9701	113.5	-35.8441	-43.5579
37.9701	113.5	-35.0631	-42.5931
37.9701	113.5	-43.2081	-49.3527
37.9701	113.5	-45.1509	-51.3155
37.9701	113.501	-45.8234	-51.546
37.9701	113.501	-46.5655	-51.7764
37.9701	113.501	-47.3302	-52.0068
37.9701	113.501	-48.8562	-53.5945
37.9701	113.501	-57.0327	-61.922
37.9701	113.501	-56.8278	-61.2731
37.9701	113.501	-56.365	-60.3204
37.9701	113.502	-55.7594	-59.3676
37.9701	113.502	-55.3429	-58.7072
37.9701	113.502	-53.9846	-57.0563
37.9701	113.502	-52.3719	-55.4053
37.9701	113.502	-52.2639	-55.2312
37.9701	113.502	-54.0553	-56.8005
37.9701	113.502	-55.5792	-58.3238
37.9701	113.502	-58.2081	-60.9951
37.9701	113.503	-60.0569	-63.4172
37.9701	113.503	-62.736	-65.7003
37.9701	113.503	-61.7204	-64.622
37.9701	113.503	-62.999	-66.271
37.9701	113.503	-66.9478	-71.0008
37.9701	113.503	-71.7889	-76.6239
37.9701	113.503	-76.1651	-81.7023
37.9701	113.503	-78.2153	-84.0142
37.9701	113.504	-80.1828	-86.326
37.9701	113.504	-77.1498	-82.6813
37.9701	113.504	-73.7839	-78.9074
37.9701	113.504	-70.2934	-75.1334
37.9701	113.504	-70.4912	-75.2194
37.9701	113.504	-70.6484	-75.3054
37.9701	113.504	-70.7877	-75.3914
37.9701	113.504	-69.4542	-73.7879
37.9701	113.505	-67.856	-72.0047
37.9701	113.505	-66.2322	-70.2216
37.9701	113.505	-64.8212	-68.7342
37.9701	113.505	-63.3328	-67.3445
37.9701	113.505	-61.7664	-65.9548
37.9701	113.505	-59.3614	-63.5655
37.9701	113.505	-57.028	-61.2582
37.9701	113.505	-54.6225	-58.9509
37.9701	113.506	-52.4591	-56.7478
37.9701	113.506	-50.6594	-54.7707
37.9701	113.506	-48.7396	-52.7937
37.9701	113.506	-50.636	-54.5639
37.9701	113.506	-48.2612	-52.165
37.9701	113.506	-45.8824	-49.766
37.9701	113.506	-43.2404	-47.2816
37.9701	113.506	-43.1332	-47.2276
37.9701	113.507	-42.9169	-47.1736
37.9701	113.507	-42.5922	-47.1196
37.9701	113.507	-42.5922	-47.1196
37.9701	113.507	-39.7525	-43.7212
37.9701	113.507	-39.7525	-43.7212
37.9701	113.507	-35.7957	-39.6743
37.9701	113.507	-30.1269	-34.6547
37.9701	113.508	-25.3292	-29.6352
37.9701	113.508	-26.9407	-30.9446
37.9701	113.508	-27.1576	-30.5371
37.9701	113.508	-27.2723	-30.1297
37.9701	113.508	-25.4094	-28.6733
37.9701	113.508	-23.9683	-28.3694
37.9701	113.508	-22.1843	-27.9286
37.9701	113.508	-21.6986	-27.8658
37.9701	113.509	-21.2956	-27.4201
37.9701	113.509	-19.5108	-25.0692
37.97	113.498	-0.0111679	-7.7654
37.97	113.499	-6.37993	-13.4853
37.97	113.499	-13.4946	-19.8937
37.97	113.499	-15.8561	-22.357
37.97	113.499	-19.7861	-26.0697
37.97	113.499	-23.6366	-29.7678
37.97	113.499	-26.332	-32.4861
37.97	113.499	-29.1003	-34.7361
37.97	113.499	-31.1823	-36.5347
37.97	113.5	-32.8482	-38.3334
37.97	113.5	-34.4843	-40.3847
37.97	113.5	-34.659	-41.0329
37.97	113.5	-34.8438	-41.6811
37.97	113.5	-33.5752	-40.3656
37.97	113.5	-36.1102	-42.6879
37.97	113.5	-38.0464	-44.5704
37.97	113.5	-40.0242	-46.7065
37.97	113.501	-40.5769	-46.9432
37.97	113.501	-41.5432	-47.4427
37.97	113.501	-42.5424	-47.9423
37.97	113.501	-44.5282	-49.9605
37.97	113.501	-50.0052	-55.4097
37.97	113.501	-55.4201	-60.859
37.97	113.501	-55.9638	-60.9983
37.97	113.501	-55.093	-59.7421
37.97	113.502	-54.1708	-58.4858
37.97	113.502	-54.3206	-58.1066
37.97	113.502	-52.866	-56.269
37.97	113.502	-50.7742	-54.2992
37.97	113.502	-50.504	-54.4774
37.97	113.502	-51.6637	-56.166
37.97	113.502	-52.7635	-58.0678
37.97	113.502	-53.0867	-58.769
37.97	113.503	-53.1577	-59.3273
37.97	113.503	-54.9334	-60.4504
37.97	113.503	-55.2824	-60.5005
37.97	113.503	-59.3248	-63.7864
37.97	113.503	-64.8472	-69.0749
37.97	113.503	-70.5135	-74.9592
37.97	113.503	-74.0774	-79.4226
37.97	113.503	-75.2185	-81.2374
37.97	113.504	-76.2483	-83.0523
37.97	113.504	-73.3481	-79.1047
37.97	113.504	-70.0995	-75.1572
37.97	113.504	-66.6336	-71.2097
37.97	113.504	-68.3383	-72.8984
37.97	113.504	-70.2126	-74.7176
37.97	113.504	-72.096	-76.5368
37.97	113.504	-71.8245	-76.0387
37.97	113.505	-70.1202	-74.1565
37.97	113.505	-68.3726	-72.2743
37.97	113.505	-66.1712	-69.9732
37.97	113.505	-64.9982	-68.6962
37.97	113.505	-63.668	-67.4191
37.97	113.505	-61.3688	-65.1898
37.97	113.505	-59.31	-63.1898
37.97	113.505	-57.2441	-61.1898
37.97	113.506	-55.6701	-59.611
37.97	113.506	-52.444	-56.2359
37.97	113.506	-53.925	-57.6455
37.97	113.506	-51.3016	-55.0698
37.97	113.506	-48.7588	-52.4941
37.97	113.506	-45.6256	-49.5251
37.97	113.506	-44.8925	-48.9076
37.97	113.507	-44.0983	-48.29
37.97	113.507	-43.3417	-47.6725
37.97	113.507	-43.3417	-47.6725
37.97	113.507	-40.4308	-44.2148
37.97	113.507	-40.4308	-44.2148
37.97	113.507	-35.4833	-39.2032
37.97	113.507	-29.955	-34.5029
37.97	113.508	-25.2937	-29.8026
37.97	113.508	-26.4921	-30.4369
37.97	113.508	-27.0687	-30.421
37.97	113.508	-27.3304	-30.2847
37.97	113.508	-25.4927	-29.0816
37.97	113.508	-23.545	-28.28
37.97	113.508	-21.8169	-27.8227
37.97	113.508	-21.6877	-28.0297
37.97	113.509	-21.3106	-27.5444
37.97	113.509	-19.4606	-25.0018
37.9699	113.499	-3.87923	-11.8462
37.9699	113.499	-10.4632	-17.874
37.9699	113.499	-13.0837	-20.3991
37.9699	113.499	-16.5807	-23.7239
37.9699	113.499	-21.1178	-27.5308
37.9699	113.499	-24.5988	-30.6781
37.9699	113.499	-27.381	-33.2783
37.9699	113.499	-29.7974	-35.2965
37.9699	113.5	-31.7207	-37.3147
37.9699	113.5	-33.7144	-39.4248
37.9699	113.5	-33.3661	-39.3366
37.9699	113.5	-32.7062	-39.0092
37.9699	113.5	-31.4763	-37.9239
37.9699	113.5	-32.2865	-38.8098
37.9699	113.5	-33.3293	-40.1293
37.9699	113.5	-34.6949	-41.8621
37.9699	113.501	-35.463	-42.6073
37.9699	113.501	-36.1595	-42.774
37.9699	113.501	-36.8622	-42.9406
37.9699	113.501	-41.2798	-47.0054
37.9699	113.501	-48.3023	-53.8993
37.9699	113.501	-55.2359	-60.7932
37.9699	113.501	-56.139	-61.2555
37.9699	113.501	-54.5807	-59.303
37.9699	113.502	-52.9429	-57.3505
37.9699	113.502	-52.3984	-56.337
37.9699	113.502	-51.004	-54.7431
37.9699	113.502	-48.5063	-52.8865
37.9699	113.502	-47.4901	-53.2044
37.9699	113.502	-47.6425	-54.0722
37.9699	113.502	-47.2875	-55.1858
37.9699	113.502	-46.597	-54.8635
37.9699	113.503	-45.8694	-54.5412
37.9699	113.503	-47.4843	-55.2506
37.9699	113.503	-49.9361	-56.5574
37.9699	113.503	-55.2952	-60.6268
37.9699	113.503	-62.1616	-66.6101
37.9699	113.503	-68.3864	-72.3012
37.9699	113.503	-71.2529	-75.9618
37.9699	113.503	-71.4206	-77.0644
37.9699	113.504	-71.5161	-78.1669
37.9699	113.504	-70.2424	-76.1905
37.9699	113.504	-68.4314	-73.5747
37.9699	113.504	-65.6555	-70.2116
37.9699	113.504	-67.2732	-71.7378
37.9699	113.504	-70.7955	-75.0871
37.9699	113.504	-73.4378	-77.5991
37.9699	113.504	-73.5545	-77.57
37.9699	113.505	-70.8955	-74.7812
37.9699	113.505	-68.2791	-71.9924
37.9699	113.505	-65.3546	-68.9835
37.9699	113.505	-64.5715	-68.1004
37.9699	113.505	-63.7772	-67.2172
37.9699	113.505	-62.2705	-65.8129
37.9699	113.505	-61.0545	-64.6363
37.9699	113.505	-59.7735	-63.4596
37.9699	113.506	-59.8169	-63.5261
37.9699	113.506	-57.8108	-61.3929
37.9699	113.506	-57.2772	-60.8583
37.9699	113.506	-53.8767	-57.4633
37.9699	113.506	-50.434	-54.0683
37.9699	113.506	-46.9231	-50.6733
37.9699	113.506	-46.175	-50.1222
37.9699	113.507	-45.4814	-49.571
37.9699	113.507	-44.6772	-49.0199
37.9699	113.507	-44.6772	-49.0199
37.9699	113.507	-41.5582	-45.1936
37.9699	113.507	-41.5582	-45.1936
37.9699	113.507	-37.3623	-40.9533
37.9699	113.507	-32.9345	-36.7131
37.9699	113.508	-28.1276	-32.4729
37.9699	113.508	-27.5383	-31.615
[truncated: 1,934 more rows]
