# Supplementary material for: Mine subsidence monitoring and prediction integrating SBAS-InSAR technology and BO-Prophet model
Source: PeerJ journal article supplement (doi:10.7717/peerj-cs.3327), 2025-10-28
Supplement: Figure124.xlsx [file Figure124.xlsx]

## Sheet: Sheet1
y	x	SBAS-InSAR	Prediction
37.9743	113.5	-22.8258	-19.7527
37.9743	113.5	-21.1528	-17.0882
37.9743	113.5	-30.3145	-19.9592
37.9743	113.5	-27.8074	-22.8727
37.9743	113.501	-29.1626	-24.392
37.9741	113.5	-30.5528	-27.9882
37.9741	113.5	-34.312	-32.1384
37.9741	113.5	-29.9524	-27.5646
37.9741	113.5	-25.9225	-22.9908
37.9741	113.5	-29.665	-19.796
37.9741	113.5	-26.0792	-22.5541
37.9741	113.5	-29.3069	-24.7475
37.9741	113.501	-30.3154	-25.1718
37.9741	113.501	-29.0941	-24.2446
37.9741	113.501	-28.1849	-23.9094
37.9741	113.501	-27.7918	-23.497
37.9741	113.501	-28.5538	-22.5901
37.974	113.5	-28.5031	-25.2213
37.974	113.5	-31.6513	-28.9059
37.974	113.5	-34.8484	-32.5906
37.974	113.5	-31.6127	-29.5352
37.974	113.5	-28.6132	-26.4798
37.974	113.5	-26.5666	-24.117
37.974	113.5	-28.8285	-25.5021
37.974	113.5	-30.8162	-26.029
37.974	113.501	-30.7104	-25.0058
37.974	113.501	-28.6613	-23.1664
37.974	113.501	-27.1194	-22.0617
37.974	113.501	-26.8007	-21.9169
37.974	113.501	-27.6561	-21.9981
37.974	113.501	-27.2947	-21.3675
37.974	113.501	-24.3964	-19.3896
37.974	113.501	-21.7057	-17.3092
37.974	113.502	-18.8229	-14.9079
37.9739	113.499	-26.0696	-21.545
37.9739	113.5	-27.7471	-24.2256
37.9739	113.5	-29.82	-26.9063
37.9739	113.5	-32.3164	-29.5869
37.9739	113.5	-31.4166	-29.2125
37.9739	113.5	-30.7842	-28.838
37.9739	113.5	-30.3021	-28.0338
37.9739	113.5	-30.5037	-27.1743
37.9739	113.5	-30.3308	-25.4424
37.9739	113.501	-29.1137	-23.3834
37.9739	113.501	-26.9797	-21.2158
37.9739	113.501	-27.0299	-19.5487
37.9739	113.501	-25.0116	-19.3549
37.9739	113.501	-26.4223	-20.4156
37.9739	113.501	-26.204	-21.2876
37.9739	113.501	-24.0715	-20.0229
37.9739	113.501	-21.756	-18.042
37.9739	113.502	-19.1874	-15.8587
37.9739	113.502	-17.8229	-14.6835
37.9739	113.502	-16.4704	-13.5084
37.9739	113.502	-16.1207	-13.3486
37.9738	113.499	-19.3068	-15.8048
37.9738	113.499	-26.1868	-18.7879
37.9738	113.5	-23.5513	-19.9184
37.9738	113.5	-24.2981	-21.0489
37.9738	113.5	-25.574	-22.3979
37.9738	113.5	-27.5456	-24.8521
37.9738	113.5	-29.0397	-26.8016
37.9738	113.5	-30.0791	-27.7965
37.9738	113.5	-28.5169	-25.2773
37.9738	113.5	-27.6533	-23.2209
37.9738	113.501	-26.4876	-21.43
37.9738	113.501	-25.6323	-19.975
37.9738	113.501	-25.7491	-18.2314
37.9738	113.501	-24.147	-17.9183
37.9738	113.501	-24.9597	-19.5076
37.9738	113.501	-25.1254	-21.0756
37.9738	113.501	-23.3482	-20.1039
37.9738	113.501	-21.2433	-18.129
37.9738	113.502	-19.1868	-16.2518
37.9738	113.502	-18.1845	-15.4049
37.9738	113.502	-16.9699	-14.2267
37.9738	113.502	-16.1782	-13.415
37.9738	113.502	-15.222	-12.0704
37.9738	113.502	-11.1286	-7.54381
37.9736	113.499	-13.7617	-7.24709
37.9736	113.499	-14.2387	-10.4326
37.9736	113.499	-17.2382	-13.6182
37.9736	113.5	-22.0323	-14.1504
37.9736	113.5	-17.9641	-14.061
37.9736	113.5	-18.9817	-15.0346
37.9736	113.5	-22.5507	-19.1551
37.9736	113.5	-25.4547	-22.5451
37.9736	113.5	-26.8321	-23.9056
37.9736	113.5	-25.1416	-21.3582
37.9736	113.5	-27.5121	-20.2932
37.9736	113.501	-26.9034	-20.1516
37.9736	113.501	-27.2181	-20.5651
37.9736	113.501	-26.0067	-20.2455
37.9736	113.501	-26.6257	-20.3972
37.9736	113.501	-25.9387	-21.1248
37.9736	113.501	-25.505	-21.9814
37.9736	113.501	-23.8179	-20.9517
37.9736	113.501	-21.3963	-18.6192
37.9736	113.502	-18.964	-16.2868
37.9736	113.502	-18.4011	-15.7779
37.9736	113.502	-17.085	-14.2425
37.9736	113.502	-15.7287	-12.7071
37.9736	113.502	-14.5199	-10.9534
37.9736	113.502	-13.5921	-9.99706
37.9736	113.502	-10.9765	-7.34604
37.9736	113.503	-12.0849	-8.17822
37.9736	113.503	-14.2514	-10.0321
37.9735	113.499	-9.2349	-2.52289
37.9735	113.499	-12.5928	-5.66194
37.9735	113.499	-15.9967	-8.801
37.9735	113.5	-16.5919	-9.45631
37.9735	113.5	-15.7595	-8.37069
37.9735	113.5	-16.7347	-8.96642
37.9735	113.5	-21.0907	-12.9958
37.9735	113.5	-24.506	-16.3181
37.9735	113.5	-25.6751	-17.5076
37.9735	113.5	-24.6992	-16.8596
37.9735	113.5	-26.5179	-19.667
37.9735	113.501	-28.851	-22.926
37.9735	113.501	-30.8127	-25.6097
37.9735	113.501	-30.0547	-25.8639
37.9735	113.501	-29.2913	-25.6098
37.9735	113.501	-28.5456	-24.5929
37.9735	113.501	-26.7759	-23.576
37.9735	113.501	-24.9483	-22.1404
37.9735	113.502	-18.9036	-16.1093
37.9735	113.502	-18.7457	-15.9271
37.9735	113.502	-17.6106	-14.3585
37.9735	113.502	-15.8799	-12.2824
37.9735	113.502	-14.5963	-10.444
37.9735	113.502	-15.3039	-10.89
37.9735	113.502	-16.6742	-11.8804
37.9735	113.503	-16.7164	-11.8374
37.9735	113.503	-18.8753	-13.5965
37.9735	113.503	-17.9718	-13.0751
37.9735	113.503	-17.1308	-12.5538
37.9735	113.503	-15.8007	-11.6377
37.9734	113.499	-6.72897	-0.567543
37.9734	113.499	-7.4071	-0.840141
37.9734	113.499	-9.68518	-3.2459
37.9734	113.499	-11.9241	-5.65166
37.9734	113.5	-12.5263	-6.49117
37.9734	113.5	-11.1099	-4.84756
37.9734	113.5	-11.8122	-5.05869
37.9734	113.5	-15.5877	-8.11839
37.9734	113.5	-19.2757	-11.3845
37.9734	113.5	-20.415	-12.3525
37.9734	113.5	-21.6994	-14.1821
37.9734	113.5	-26.3101	-20.0411
37.9734	113.501	-31.4159	-26.3434
37.9734	113.501	-34.4869	-30.3742
37.9734	113.501	-34.2542	-30.8189
37.9734	113.501	-33.084	-30.1866
37.9734	113.501	-31.292	-27.9501
37.9734	113.501	-28.9081	-25.7136
37.9734	113.501	-28.2564	-25.0615
37.9734	113.502	-21.3837	-18.1522
37.9734	113.502	-19.5371	-16.2511
37.9734	113.502	-19.0491	-15.2774
37.9734	113.502	-17.337	-13.3023
37.9734	113.502	-16.3625	-11.8345
37.9734	113.502	-17.3521	-12.4866
37.9734	113.502	-18.9722	-13.9657
37.9734	113.502	-21.7275	-16.2688
37.9734	113.503	-23.1827	-17.472
37.9734	113.503	-23.4495	-19.4698
37.9734	113.503	-22.6928	-18.61
37.9734	113.503	-21.647	-16.8188
37.9734	113.503	-19.3558	-14.9887
37.9734	113.503	-18.3903	-14.2253
37.9734	113.503	-17.68	-13.5864
37.9734	113.503	-15.4524	-11.6768
37.9734	113.504	-11.9752	-8.44072
37.9733	113.499	-7.27247	-1.16505
37.9733	113.499	-7.92851	-1.34839
37.9733	113.499	-8.70076	-2.58298
37.9733	113.499	-9.48173	-3.81757
37.9733	113.5	-9.96016	-4.60475
37.9733	113.5	-9.31436	-3.68566
37.9733	113.5	-10.3594	-4.19045
37.9733	113.5	-13.4764	-6.56654
37.9733	113.5	-16.9089	-9.50267
37.9733	113.5	-18.6212	-11.1033
37.9733	113.5	-21.6597	-14.8021
37.9733	113.5	-28.3638	-22.8042
37.9733	113.501	-34.9731	-30.718
37.9733	113.501	-37.4405	-34.1431
37.9733	113.501	-36.2532	-33.1764
37.9733	113.501	-34.2679	-31.3023
37.9733	113.501	-32.5	-29.3103
37.9733	113.501	-30.6693	-27.3182
37.9733	113.501	-30.2028	-26.7018
37.9733	113.501	-28.506	-25.1193
37.9733	113.502	-21.5101	-17.6189
37.9733	113.502	-22.1084	-17.9213
37.9733	113.502	-23.0864	-18.8024
37.9733	113.502	-22.1364	-17.0201
37.9733	113.502	-23.0796	-17.572
37.9733	113.502	-26.0488	-20.192
37.9733	113.503	-29.1455	-22.9324
37.9733	113.503	-29.2048	-24.6521
37.9733	113.503	-29.3147	-24.6402
37.9733	113.503	-26.6129	-21.8344
37.9733	113.503	-23.4772	-18.9543
37.9733	113.503	-20.4582	-16.4043
37.9733	113.503	-18.8184	-14.852
37.9733	113.503	-16.7982	-12.9932
37.9733	113.504	-13.4752	-9.59405
37.9733	113.504	-10.4508	-6.59766
37.9733	113.504	-7.73849	-4.0681
37.9733	113.504	-7.26614	-4.26919
37.9733	113.504	-7.23962	-4.8524
37.9731	113.499	-7.32128	-1.97028
37.9731	113.499	-8.16045	-2.08476
37.9731	113.499	-9.02048	-2.19924
37.9731	113.499	-8.61357	-2.31648
37.9731	113.499	-8.20895	-2.43371
37.9731	113.5	-8.10016	-2.71357
37.9731	113.5	-8.67526	-3.11059
37.9731	113.5	-10.7468	-4.74891
37.9731	113.5	-13.9912	-7.46591
37.9731	113.5	-17.2829	-10.4231
37.9731	113.5	-19.4713	-12.6135
37.9731	113.5	-23.5806	-17.2768
37.9731	113.5	-30.5057	-25.1796
37.9731	113.501	-36.8674	-32.6079
37.9731	113.501	-38.1244	-34.6946
37.9731	113.501	-36.246	-33.0672
37.9731	113.501	-34.1349	-31.149
37.9731	113.501	-33.0451	-29.8298
37.9731	113.501	-32.1246	-28.7013
37.9731	113.501	-31.7073	-28.0715
37.9731	113.501	-32.4189	-28.8195
37.9731	113.502	-27	-22.7887
37.9731	113.502	-26.491	-22.0485
37.9731	113.502	-29.9288	-25.4148
37.9731	113.502	-28.1731	-23.4207
37.9731	113.502	-27.334	-22.0376
37.9731	113.502	-26.2352	-20.5407
37.9731	113.502	-28.7085	-22.8467
37.9731	113.503	-31.0644	-25.4843
37.9731	113.503	-32.2851	-27.1014
37.9731	113.503	-33.2796	-28.1413
37.9731	113.503	-30.427	-25.4585
37.9731	113.503	-27.4446	-22.5837
37.9731	113.503	-23.8326	-19.4684
37.9731	113.503	-21.3533	-17.1472
37.9731	113.503	-19.1888	-14.9856
37.9731	113.504	-15.5513	-11.263
37.9731	113.504	-12.6066	-8.28829
37.9731	113.504	-9.53318	-5.4147
37.9731	113.504	-8.69462	-5.44352
37.9731	113.504	-8.7536	-6.30469
37.9731	113.504	-9.65241	-7.76942
37.9731	113.504	-12.9686	-11.0631
37.9731	113.504	-16.2264	-14.3569
37.9731	113.505	-17.6754	-15.8479
37.973	113.499	-5.86354	-0.255349
37.973	113.499	-6.92641	-0.474821
37.973	113.499	-7.98385	-0.694293
37.973	113.499	-7.48474	-0.693268
37.973	113.499	-6.50157	-0.184832
37.973	113.5	-6.78866	-0.823756
37.973	113.5	-9.13166	-2.94586
37.973	113.5	-12.8265	-6.44676
37.973	113.5	-16.6578	-10.1791
37.973	113.5	-20.0791	-13.7186
37.973	113.5	-22.8043	-16.6614
37.973	113.5	-27.093	-21.5091
37.973	113.5	-33.5471	-28.8589
37.973	113.501	-39.2766	-35.4266
37.973	113.501	-40.0067	-36.8578
37.973	113.501	-37.8889	-35.0052
37.973	113.501	-35.7794	-33.1526
37.973	113.501	-34.7329	-31.891
37.973	113.501	-33.8774	-30.6423
37.973	113.501	-32.9669	-29.3935
37.973	113.501	-33.727	-30.2517
37.973	113.502	-31.7907	-28.2575
37.973	113.502	-31.1262	-26.5814
37.973	113.502	-33.5272	-28.9127
37.973	113.502	-32.3991	-27.6789
37.973	113.502	-29.5774	-23.9492
37.973	113.502	-30.5808	-24.7416
37.973	113.503	-32.2673	-26.3998
37.973	113.503	-33.7295	-27.5086
37.973	113.503	-33.8118	-28.6175
37.973	113.503	-31.6318	-26.7783
37.973	113.503	-30.271	-24.525
37.973	113.503	-26.7816	-21.8019
37.973	113.503	-23.8883	-19.1826
37.973	113.503	-21.5722	-16.8797
37.973	113.504	-18.3676	-13.6801
37.973	113.504	-15.6863	-11.1744
37.973	113.504	-12.9541	-8.66006
37.973	113.504	-11.9802	-8.59111
37.973	113.504	-12.2597	-9.66132
37.973	113.504	-12.9837	-11.0534
37.973	113.504	-15.6072	-13.6709
37.973	113.504	-18.2151	-16.2883
37.973	113.505	-20.5312	-18.5925
37.973	113.505	-17.3846	-15.6236
37.973	113.505	-13.3858	-12.0751
37.973	113.505	-9.4395	-8.52651
37.973	113.505	-10.466	-9.73279
37.9729	113.499	-2.79914	3.69191
37.9729	113.499	-4.53659	2.45975
37.9729	113.499	-6.20555	1.22759
37.9729	113.499	-6.56425	0.36687
37.9729	113.499	-5.70529	0.889024
37.9729	113.5	-6.34153	-0.00168059
37.9729	113.5	-9.59711	-2.8845
37.9729	113.5	-14.2656	-7.48206
37.9729	113.5	-18.8234	-12.2549
37.9729	113.5	-22.559	-16.5871
37.9729	113.5	-25.8409	-20.4873
37.9729	113.5	-30.2737	-25.7516
37.9729	113.5	-36.3028	-32.8122
37.9729	113.501	-41.5635	-38.7167
37.9729	113.501	-42.1642	-39.7625
37.9729	113.501	-39.9573	-37.7123
37.9729	113.501	-37.7523	-35.662
37.9729	113.501	-36.6831	-34.4968
37.9729	113.501	-34.888	-31.7203
37.9729	113.501	-35.6565	-32.29
37.9729	113.502	-37.5596	-34.2057
37.9729	113.502	-36.6531	-32.2173
37.9729	113.502	-34.9713	-30.2773
37.9729	113.502	-34.9291	-30.1527
37.9729	113.502	-34.2651	-29.2791
37.9729	113.502	-31.8227	-26.0866
37.9729	113.503	-32.5031	-26.8115
37.9729	113.503	-33.903	-27.7249
37.9729	113.503	-33.08	-27.9474
37.9729	113.503	-31.8788	-26.9235
37.9729	113.503	-32.6012	-26.1084
37.9729	113.503	-31.3981	-25.7006
37.9729	113.503	-29.6201	-24.4414
37.9729	113.503	-26.4924	-21.4612
37.9729	113.504	-22.1776	-17.3978
37.9729	113.504	-18.6449	-14.1747
37.9729	113.504	-16.5058	-12.3338
37.9729	113.504	-15.9488	-12.6998
37.9729	113.504	-16.5157	-13.9861
37.9729	113.504	-17.1624	-15.2724
37.9729	113.504	-18.6693	-16.6807
37.9729	113.504	-20.2553	-18.0889
37.9729	113.505	-21.7935	-19.4972
37.9729	113.505	-19.2624	-17.149
37.9729	113.505	-11.8345	-10.8233
37.9729	113.505	-11.9359	-11.2227
37.9729	113.505	-10.3334	-8.84985
37.9729	113.505	-8.71645	-6.477
37.9729	113.505	-7.01979	-3.9444
37.9729	113.506	-6.87665	-3.42583
37.9728	113.499	-0.944198	5.50052
37.9728	113.499	-0.705288	6.49932
37.9728	113.499	-3.05951	4.08179
37.9728	113.499	-5.32662	1.66425
37.9728	113.499	-6.67024	-0.270937
37.9728	113.499	-6.03215	0.14468
37.9728	113.5	-7.12662	-0.915794
37.9728	113.5	-10.4314	-3.62622
37.9728	113.5	-15.5736	-8.53177
37.9728	113.5	-20.2376	-13.556
37.9728	113.5	-24.3837	-18.8378
37.9728	113.5	-28.1405	-23.7329
37.9728	113.5	-32.601	-29.3676
37.9728	113.5	-37.6642	-35.5257
37.9728	113.501	-41.7422	-40.0336
37.9728	113.501	-41.6453	-40.2502
37.9728	113.501	-39.5955	-38.199
37.9728	113.501	-37.6992	-36.1479
37.9728	113.501	-37.4657	-35.7301
37.9728	113.501	-36.4452	-34.3939
37.9728	113.501	-37.3391	-34.6429
37.9728	113.501	-38.6861	-35.3608
37.9728	113.502	-41.5633	-38.138
37.9728	113.502	-42.4642	-38.7233
37.9728	113.502	-36.6892	-31.9305
37.9728	113.502	-34.7699	-29.8628
37.9728	113.502	-34.5634	-29.5941
37.9728	113.502	-33.6662	-28.1636
37.9728	113.503	-34.3227	-28.6905
37.9728	113.503	-35.743	-29.792
37.9728	113.503	-34.4576	-29.1556
37.9728	113.503	-33.3173	-28.2014
37.9728	113.503	-35.4385	-28.4618
37.9728	113.503	-36.5286	-30.4327
37.9728	113.503	-35.7154	-30.3736
37.9728	113.503	-31.3782	-26.3882
37.9728	113.504	-25.5331	-20.7971
37.9728	113.504	-21.5114	-17.0985
37.9728	113.504	-19.9566	-15.8669
37.9728	113.504	-19.8397	-16.5398
37.9728	113.504	-20.3203	-17.7463
37.9728	113.504	-21.036	-19.1
37.9728	113.504	-21.624	-19.3961
37.9728	113.504	-22.1715	-19.6135
37.9728	113.505	-22.7486	-19.831
37.9728	113.505	-20.8984	-18.2462
37.9728	113.505	-17.524	-15.5034
37.9728	113.505	-14.1872	-12.7606
37.9728	113.505	-13.3826	-12.0149
37.9728	113.505	-11.8632	-9.69467
37.9728	113.505	-10.4104	-7.37446
37.9728	113.505	-9.33957	-5.66268
37.9728	113.506	-9.08909	-5.36542
37.9728	113.506	-8.84292	-5.06816
37.9728	113.506	-9.04284	-5.24658
37.9728	113.506	-10.6046	-7.06702
37.9726	113.499	-0.788587	6.07055
37.9726	113.499	-1.95922	5.21963
37.9726	113.499	-4.04339	2.60977
37.9726	113.499	-6.04081	-8.41088e-05
37.9726	113.499	-7.47937	-2.06068
37.9726	113.499	-7.32237	-1.86221
37.9726	113.5	-8.431	-2.66185
37.9726	113.5	-11.7121	-5.16897
37.9726	113.5	-16.637	-9.80864
37.9726	113.5	-21.4692	-14.9839
37.9726	113.5	-25.7426	-20.6911
37.9726	113.5	-30.0512	-26.62
37.9726	113.5	-34.4035	-32.3655
37.9726	113.5	-37.7593	-36.7438
37.9726	113.501	-39.6658	-38.9245
37.9726	113.501	-38.7964	-38.2781
37.9726	113.501	-37.6168	-36.7566
37.9726	113.501	-36.4734	-35.2178
37.9726	113.501	-36.6875	-35.012
37.9726	113.501	-36.2202	-34.4402
37.9726	113.501	-41.5821	-38.5013
37.9726	113.502	-45.0318	-41.4134
37.9726	113.502	-46.8169	-42.9279
37.9726	113.502	-44.5047	-40.2036
37.9726	113.502	-38.8652	-34.0699
37.9726	113.502	-34.4577	-29.4313
37.9726	113.502	-34.2276	-29.0749
37.9726	113.502	-33.6428	-28.4198
37.9726	113.503	-37.2284	-31.5378
37.9726	113.503	-38.362	-32.5468
37.9726	113.503	-38.0791	-31.6804
37.9726	113.503	-37.6509	-30.6531
37.9726	113.503	-38.6485	-31.4809
37.9726	113.503	-40.625	-34.5539
37.9726	113.503	-40.4747	-36.1629
37.9726	113.503	-36.427	-32.0383
37.9726	113.504	-29.9217	-25.48
37.9726	113.504	-24.6824	-20.2706
37.9726	113.504	-22.9192	-18.6324
37.9726	113.504	-22.7307	-19.0979
37.9726	113.504	-22.9643	-20.0882
37.9726	113.504	-23.6021	-21.3534
37.9726	113.504	-23.5724	-21.0208
37.9726	113.504	-23.5117	-20.4394
37.9726	113.505	-23.466	-19.8579
37.9726	113.505	-21.108	-17.966
37.9726	113.505	-18.5918	-15.9657
37.9726	113.505	-16.0978	-13.9655
37.9726	113.505	-15.0226	-12.7312
37.9726	113.505	-13.5971	-10.6313
37.9726	113.505	-12.1797	-8.5314
37.9726	113.505	-11.738	-7.87656
37.9726	113.506	-11.651	-7.96489
37.9726	113.506	-11.5419	-8.05322
37.9726	113.506	-11.7151	-8.47867
37.9726	113.506	-12.8141	-9.95837
37.9726	113.506	-13.8215	-11.186
37.9726	113.506	-16.8084	-13.9302
37.9725	113.499	-2.18251	4.05012
37.9725	113.499	-3.85489	2.649
37.9725	113.499	-5.09196	0.739978
37.9725	113.499	-6.31431	-1.16904
37.9725	113.499	-7.8082	-3.08258
37.9725	113.499	-8.27312	-3.09161
37.9725	113.5	-10.0823	-4.23091
37.9725	113.5	-13.3906	-6.83739
37.9725	113.5	-18.2257	-11.7008
37.9725	113.5	-22.7239	-16.7989
37.9725	113.5	-27.1602	-22.741
37.9725	113.5	-31.5179	-28.7374
37.9725	113.5	-35.3282	-33.8129
37.9725	113.5	-36.9308	-36.3347
37.9725	113.501	-36.8653	-36.5408
37.9725	113.501	-35.6737	-35.6983
37.9725	113.501	-35.5698	-35.2367
37.9725	113.501	-35.5087	-34.5991
37.9725	113.501	-36.2671	-34.6417
37.9725	113.501	-36.1825	-34.5634
37.9725	113.501	-38.4812	-36.5944
37.9725	113.501	-43.2983	-40.4353
37.9725	113.502	-47.6507	-43.6994
37.9725	113.502	-48.5724	-44.8231
37.9725	113.502	-47.6732	-43.7789
37.9725	113.502	-36.8958	-31.7854
37.9725	113.502	-34.7337	-29.6094
37.9725	113.502	-35.8827	-30.9839
37.9725	113.503	-40.0817	-34.5095
37.9725	113.503	-39.9826	-34.1383
37.9725	113.503	-39.9569	-33.6436
37.9725	113.503	-40.0236	-33.1489
37.9725	113.503	-41.1407	-33.8865
37.9725	113.503	-42.1383	-36.2519
37.9725	113.503	-41.7254	-37.2349
37.9725	113.503	-37.6645	-34.1039
37.9725	113.504	-32.6208	-28.7071
37.9725	113.504	-28.5556	-24.2925
37.9725	113.504	-26.6351	-22.1971
37.9725	113.504	-25.6698	-21.5267
37.9725	113.504	-24.8322	-21.2842
37.9725	113.504	-24.5987	-21.604
37.9725	113.504	-24.337	-21.1374
37.9725	113.504	-24.2776	-20.6432
37.9725	113.505	-24.2645	-20.1489
37.9725	113.505	-22.3209	-18.6202
37.9725	113.505	-20.3926	-17.0916
37.9725	113.505	-18.4872	-15.5629
37.9725	113.505	-17.2175	-13.9708
37.9725	113.505	-15.7247	-12.1132
37.9725	113.505	-14.2832	-10.3859
37.9725	113.505	-14.2785	-10.6014
37.9725	113.506	-14.4468	-11.0057
37.9725	113.506	-14.8815	-11.753
37.9725	113.506	-15.4297	-12.7128
37.9725	113.506	-16.5094	-14.3392
37.9725	113.506	-16.4812	-14.4265
37.9725	113.506	-17.213	-14.5751
37.9725	113.506	-17.5916	-14.134
37.9725	113.506	-19.7885	-15.9829
37.9724	113.499	-0.456014	4.75112
37.9724	113.499	-2.40866	3.1473
37.9724	113.499	-4.35046	1.54348
37.9724	113.499	-5.3127	-0.165467
37.9724	113.499	-6.27798	-1.87442
37.9724	113.499	-8.03716	-3.84463
37.9724	113.499	-9.53048	-4.36717
37.9724	113.5	-12.2209	-6.15754
37.9724	113.5	-15.6983	-9.29594
37.9724	113.5	-19.8026	-13.9843
37.9724	113.5	-24.1803	-19.1961
37.9724	113.5	-28.4789	-24.7499
37.9724	113.5	-32.9012	-30.4437
37.9724	113.5	-35.8654	-34.3463
37.9724	113.5	-36.437	-35.8123
37.9724	113.501	-35.5231	-35.327
37.9724	113.501	-34.5772	-34.8418
37.9724	113.501	-34.8203	-34.83
37.9724	113.501	-36.7321	-35.2459
37.9724	113.501	-36.8371	-35.3097
37.9724	113.501	-37.8823	-36.2195
37.9724	113.502	-48.8069	-45.0202
37.9724	113.502	-49.7141	-45.9771
37.9724	113.502	-50.5349	-46.7445
37.9724	113.502	-46.1216	-41.6586
37.9724	113.502	-40.7027	-35.7285
37.9724	113.502	-36.4325	-31.6139
37.9724	113.502	-38.0703	-33.663
37.9724	113.502	-39.3336	-34.3325
37.9724	113.503	-40.506	-34.9755
37.9724	113.503	-40.511	-34.3767
37.9724	113.503	-40.8329	-34.4275
37.9724	113.503	-40.9232	-34.146
37.9724	113.503	-41.3581	-34.2831
37.9724	113.503	-39.8484	-34.9077
37.9724	113.503	-40.4735	-36.2391
37.9724	113.503	-38.8279	-35.5324
37.9724	113.504	-36.7506	-33.3504
37.9724	113.504	-33.7885	-29.955
37.9724	113.504	-30.4145	-27.3168
37.9724	113.504	-29.2353	-24.9287
37.9724	113.504	-26.9313	-22.7397
37.9724	113.504	-25.3716	-21.4131
37.9724	113.504	-24.9572	-21.1872
37.9724	113.504	-25.3031	-21.6245
37.9724	113.505	-25.6499	-22.0618
37.9724	113.505	-24.1431	-20.6704
37.9724	113.505	-22.6753	-19.279
37.9724	113.505	-21.2793	-17.8876
37.9724	113.505	-19.581	-16.0799
37.9724	113.505	-17.8581	-14.2722
37.9724	113.505	-16.2836	-12.6506
37.9724	113.505	-16.6796	-13.1367
37.9724	113.506	-16.992	-13.6229
37.9724	113.506	-18.3261	-15.3433
37.9724	113.506	-19.6234	-17.186
37.9724	113.506	-20.9755	-19.0287
37.9724	113.506	-19.0324	-16.7584
37.9724	113.506	-17.5614	-14.2836
37.9724	113.506	-16.0134	-11.8087
37.9724	113.506	-17.8226	-13.1098
37.9722	113.499	0.024575	4.32415
37.9722	113.499	-1.46645	3.38163
37.9722	113.499	-2.93745	2.43911
37.9722	113.499	-4.32924	0.220402
37.9722	113.499	-5.70728	-1.9983
37.9722	113.499	-8.49073	-4.89285
37.9722	113.499	-11.2418	-6.24454
37.9722	113.5	-15.019	-9.00078
37.9722	113.5	-18.3885	-12.4857
37.9722	113.5	-22.0509	-17.4898
37.9722	113.5	-26.219	-22.8383
37.9722	113.5	-30.8204	-28.0979
37.9722	113.5	-34.6833	-32.478
37.9722	113.5	-37.0461	-35.1091
37.9722	113.5	-37.0767	-36.0147
37.9722	113.501	-36.4919	-36.0443
37.9722	113.501	-35.902	-36.0739
37.9722	113.501	-37.6077	-37.4807
37.9722	113.501	-39.0865	-37.84
37.9722	113.501	-38.201	-36.9326
37.9722	113.501	-38.201	-36.9326
37.9722	113.502	-49.5532	-45.4465
37.9722	113.502	-49.8211	-45.5739
37.9722	113.502	-47.7412	-43.1918
37.9722	113.502	-39.2133	-34.4314
37.9722	113.502	-40.5065	-35.8686
37.9722	113.502	-40.7428	-35.7138
37.9722	113.503	-40.9041	-35.3167
37.9722	113.503	-40.6236	-34.4074
37.9722	113.503	-41.0113	-34.5936
37.9722	113.503	-40.3488	-33.7653
37.9722	113.503	-39.7292	-32.9371
37.9722	113.503	-38.7347	-32.6807
37.9722	113.503	-39.0581	-34.4619
37.9722	113.503	-38.6047	-35.5682
37.9722	113.504	-38.4592	-35.5711
37.9722	113.504	-37.3796	-33.7774
37.9722	113.504	-35.6421	-31.8323
37.9722	113.504	-31.6457	-28.5797
37.9722	113.504	-28.9201	-24.5538
37.9722	113.504	-25.8833	-21.3542
37.9722	113.504	-25.4095	-21.6139
37.9722	113.504	-26.496	-23.4733
37.9722	113.505	-27.5746	-25.3327
37.9722	113.505	-26.2474	-23.7104
37.9722	113.505	-24.9939	-22.0882
37.9722	113.505	-23.8632	-20.466
37.9722	113.505	-21.8106	-18.3581
37.9722	113.505	-19.674	-16.2502
37.9722	113.505	-17.813	-14.4188
37.9722	113.505	-18.2633	-14.8279
37.9722	113.506	-18.6913	-15.237
37.9722	113.506	-21.4178	-18.2959
37.9722	113.506	-23.9712	-21.363
37.9722	113.506	-26.5819	-24.43
37.9722	113.506	-23.6208	-21.1768
37.9722	113.506	-20.1185	-16.2606
37.9722	113.506	-16.4169	-11.3445
37.9722	113.506	-17.6924	-11.8612
37.9722	113.507	-18.1107	-12.1013
37.9722	113.507	-24.4584	-18.3134
37.9722	113.507	-24.1367	-18.2407
37.9721	113.499	0.215206	3.67864
37.9721	113.499	-0.635675	3.52099
37.9721	113.499	-1.48886	3.36335
37.9721	113.499	-3.25246	0.873318
37.9721	113.499	-4.9651	-1.61671
37.9721	113.499	-8.62969	-5.38121
37.9721	113.499	-12.4489	-7.93015
37.9721	113.5	-17.4946	-12.2312
37.9721	113.5	-21.6888	-17.0098
37.9721	113.5	-25.1849	-22.0857
37.9721	113.5	-29.096	-27.275
37.9721	113.5	-33.1943	-31.6034
37.9721	113.5	-37.0162	-35.2513
37.9721	113.5	-39.1898	-37.0338
37.9721	113.5	-38.8992	-37.2865
37.9721	113.501	-38.7109	-37.8125
37.9721	113.501	-38.5872	-38.3384
37.9721	113.501	-40.912	-40.3167
37.9721	113.501	-40.8664	-40.0402
37.9721	113.501	-41.0595	-39.8561
37.9721	113.501	-39.9854	-38.7544
37.9721	113.501	-40.7061	-39.1306
37.9721	113.502	-47.5205	-42.3359
37.9721	113.502	-47.5205	-42.3359
37.9721	113.502	-47.5205	-42.3359
37.9721	113.502	-42.5326	-36.8647
37.9721	113.502	-42.5326	-36.8647
37.9721	113.502	-42.3069	-36.5364
37.9721	113.503	-40.6391	-34.2464
37.9721	113.503	-40.7527	-34.2728
37.9721	113.503	-39.5557	-33.0227
37.9721	113.503	-38.3885	-31.7726
37.9721	113.503	-37.8879	-31.4899
37.9721	113.503	-38.7984	-33.6925
37.9721	113.503	-38.4444	-35.5239
37.9721	113.504	-38.3975	-35.9967
37.9721	113.504	-38.711	-35.0387
37.9721	113.504	-37.7975	-34.1767
37.9721	113.504	-35.0478	-31.327
37.9721	113.504	-30.5607	-26.4538
37.9721	113.504	-26.3017	-21.8559
37.9721	113.504	-26.041	-22.3903
37.9721	113.504	-27.9363	-25.2236
37.9721	113.505	-30.0076	-28.2981
37.9721	113.505	-28.9999	-27.0687
37.9721	113.505	-28.0747	-25.8392
37.9721	113.505	-26.9196	-24.1334
37.9721	113.505	-25.6974	-22.8008
37.9721	113.505	-24.4285	-21.4682
37.9721	113.505	-22.0363	-18.8805
37.9721	113.505	-20.8477	-17.4909
37.9721	113.506	-19.6571	-16.1013
37.9721	113.506	-24.0468	-20.7202
37.9721	113.506	-28.2292	-25.2382
37.9721	113.506	-32.409	-29.7561
37.9721	113.506	-29.7661	-26.9139
37.9721	113.506	-18.5695	-12.8786
37.9721	113.506	-19.7399	-13.8439
37.9721	113.507	-20.8694	-15.7591
37.9721	113.507	-24.5506	-18.946
37.9721	113.507	-24.4681	-19.0441
37.9721	113.507	-24.3494	-19.0029
37.972	113.499	0.245331	3.10084
37.972	113.499	-0.319913	3.12292
37.972	113.499	-0.903628	3.145
37.972	113.499	-2.64602	1.05526
37.972	113.499	-4.27139	-1.03447
37.972	113.499	-8.23285	-5.02354
37.972	113.499	-12.7375	-8.82219
37.972	113.5	-19.1638	-15.0381
37.972	113.5	-25.2024	-21.772
37.972	113.5	-29.9267	-27.9524
37.972	113.5	-33.6529	-32.8164
37.972	113.5	-36.7013	-35.8239
37.972	113.5	-39.7256	-38.3103
37.972	113.5	-41.6368	-39.6958
37.972	113.5	-41.9823	-40.4216
37.972	113.501	-43.3626	-42.591
37.972	113.501	-45.0748	-43.8528
37.972	113.501	-44.0417	-42.9092
37.972	113.501	-43.0969	-41.6883
37.972	113.501	-41.649	-39.9729
37.972	113.501	-42.5863	-40.3419
37.972	113.501	-42.872	-40.4527
37.972	113.502	-44.1706	-39.1455
37.972	113.502	-44.1917	-39.241
37.972	113.502	-44.2727	-39.5935
37.972	113.502	-43.7373	-37.4348
37.972	113.502	-43.6311	-36.9017
37.972	113.502	-43.3342	-36.8319
37.972	113.503	-41.0476	-34.4364
37.972	113.503	-40.9355	-34.0828
37.972	113.503	-40.0864	-33.2958
37.972	113.503	-39.2336	-32.5088
37.972	113.503	-38.7578	-32.2777
37.972	113.503	-38.1824	-33.3896
37.972	113.503	-37.244	-34.1749
37.972	113.504	-37.2166	-34.07
37.972	113.504	-37.9076	-33.9733
37.972	113.504	-38.3883	-34.7673
37.972	113.504	-36.9313	-33.43
37.972	113.504	-32.8604	-29.0629
37.972	113.504	-28.3573	-24.1317
37.972	113.504	-28.0204	-24.0696
37.972	113.504	-29.8903	-26.4732
37.972	113.505	-32.0765	-29.5398
37.972	113.505	-31.8321	-29.695
37.972	113.505	-31.7114	-29.8502
37.972	113.505	-30.7557	-28.6363
37.972	113.505	-29.8056	-27.4424
37.972	113.505	-28.8374	-26.2485
37.972	113.505	-25.7433	-22.8166
37.972	113.505	-23.1507	-19.9176
37.972	113.506	-20.6207	-17.0187
37.972	113.506	-25.9668	-22.4616
37.972	113.506	-31.0472	-27.7223
37.972	113.506	-36.1425	-32.983
37.972	113.506	-35.8442	-32.8028
37.972	113.506	-23.6777	-18.8689
37.972	113.506	-21.7413	-16.9022
37.972	113.507	-23.1047	-19.4626
37.972	113.507	-23.4955	-20.2307
37.972	113.507	-25.4295	-20.0101
37.972	113.507	-25.3288	-20.0885
37.972	113.507	-25.1062	-20.3846
37.9719	113.499	0.396035	2.8093
37.9719	113.499	-0.41053	2.28237
37.9719	113.499	-1.21629	1.75544
37.9719	113.499	-2.6158	0.31806
37.9719	113.499	-4.69955	-1.82472
37.9719	113.499	-8.54931	-5.6437
37.9719	113.499	-13.8522	-10.8741
37.9719	113.5	-20.6497	-17.8808
37.9719	113.5	-28.0139	-25.8151
37.9719	113.5	-33.4433	-31.9934
37.9719	113.5	-37.2258	-36.6911
37.9719	113.5	-39.5233	-39.0485
37.9719	113.5	-42.3559	-41.067
37.9719	113.5	-43.611	-42.0844
37.9719	113.5	-44.5736	-43.3481
37.9719	113.501	-46.2789	-45.1443
37.9719	113.501	-48.213	-46.9404
37.9719	113.501	-49.2306	-47.6132
37.9719	113.501	-48.3997	-47.0952
37.9719	113.501	-44.4163	-42.3242
37.9719	113.501	-44.2354	-41.5249
37.9719	113.501	-45.3852	-42.8302
37.9719	113.502	-43.9753	-39.7996
37.9719	113.502	-42.9261	-38.4105
37.9719	113.502	-43.4365	-39.2707
37.9719	113.502	-43.7923	-38.8042
37.9719	113.502	-43.921	-37.9191
37.9719	113.502	-43.7035	-36.8296
37.9719	113.502	-43.1629	-36.7209
37.9719	113.503	-42.4653	-35.9453
37.9719	113.503	-41.8011	-35.1698
37.9719	113.503	-41.6704	-34.7071
37.9719	113.503	-41.0897	-34.3557
37.9719	113.503	-40.6317	-34.0044
37.9719	113.503	-39.9995	-33.8188
37.9719	113.503	-38.1556	-34.1504
37.9719	113.503	-38.6727	-34.2525
37.9719	113.504	-37.9044	-33.6172
37.9719	113.504	-38.0355	-33.993
37.9719	113.504	-39.4829	-35.7753
37.9719	113.504	-39.3715	-35.7921
37.9719	113.504	-36.1797	-32.2951
37.9719	113.504	-32.1422	-27.6212
37.9719	113.504	-31.2906	-26.5656
37.9719	113.504	-32.4691	-27.8468
37.9719	113.505	-34.0268	-30.0073
37.9719	113.505	-34.194	-31.3354
37.9719	113.505	-34.5584	-32.6634
37.9719	113.505	-33.9601	-32.1923
37.9719	113.505	-33.7356	-31.7087
37.9719	113.505	-33.5178	-31.2251
37.9719	113.505	-30.0323	-27.2972
37.9719	113.505	-26.0946	-22.9331
37.9719	113.506	-22.1492	-18.5689
37.9719	113.506	-26.2299	-22.6785
37.9719	113.506	-31.7701	-28.3808
37.9719	113.506	-37.3525	-34.083
37.9719	113.506	-36.5817	-33.467
37.9719	113.506	-33.4618	-29.9121
37.9719	113.506	-23.4623	-20.2638
37.9719	113.507	-24.3994	-21.9891
37.9719	113.507	-24.3738	-22.1186
37.9719	113.507	-25.4968	-20.7545
37.9719	113.507	-25.5561	-20.8162
37.9719	113.507	-25.0914	-21.2195
37.9719	113.507	-24.5966	-21.6229
37.9719	113.507	-24.3019	-21.9254
37.9717	113.499	1.34939	3.39878
37.9717	113.499	0.331752	2.32107
37.9717	113.499	-0.668864	1.24336
37.9717	113.499	-1.67952	0.165654
37.9717	113.499	-2.87912	-0.981729
37.9717	113.499	-4.80704	-2.8345
37.9717	113.499	-9.81758	-7.62354
37.9717	113.499	-16.0443	-14.0219
37.9717	113.5	-23.5373	-21.9318
37.9717	113.5	-29.741	-28.7035
37.9717	113.5	-35.34	-34.984
37.9717	113.5	-39.3521	-39.4778
37.9717	113.5	-42.6735	-42.2111
37.9717	113.5	-44.3266	-43.3976
37.9717	113.5	-44.8749	-44.1539
37.9717	113.5	-45.4642	-45.0992
37.9717	113.501	-47.6843	-46.983
37.9717	113.501	-49.991	-48.8521
37.9717	113.501	-52.0947	-50.465
37.9717	113.501	-51.9488	-50.7535
37.9717	113.501	-49.5593	-48.0542
37.9717	113.501	-47.5556	-45.5146
37.9717	113.501	-46.1833	-43.5731
37.9717	113.501	-47.5911	-45.3582
37.9717	113.502	-47.0498	-44.4314
37.9717	113.502	-43.4528	-39.371
37.9717	113.502	-43.7386	-39.8569
37.9717	113.502	-43.5622	-39.1758
37.9717	113.502	-42.9209	-36.7964
37.9717	113.502	-42.676	-36.5948
37.9717	113.503	-42.5852	-36.3934
37.9717	113.503	-42.5111	-36.1919
37.9717	113.503	-42.5781	-36.0147
37.9717	113.503	-41.4837	-35.1866
37.9717	113.503	-40.4156	-34.3585
37.9717	113.503	-39.7675	-34.2175
37.9717	113.503	-40.4252	-35.5915
37.9717	113.503	-40.6145	-36.3336
37.9717	113.504	-39.9928	-35.7871
37.9717	113.504	-39.8272	-35.5965
37.9717	113.504	-41.0599	-37.0809
37.9717	113.504	-41.4232	-37.6446
37.9717	113.504	-39.5441	-35.6433
37.9717	113.504	-37.0017	-32.599
37.9717	113.504	-34.486	-30.9564
37.9717	113.504	-35.6307	-30.836
37.9717	113.505	-35.7246	-31.3642
37.9717	113.505	-35.9248	-32.6614
37.9717	113.505	-36.1209	-33.9586
37.9717	113.505	-35.7924	-33.9659
37.9717	113.505	-35.3774	-33.3246
37.9717	113.505	-34.9769	-32.6833
37.9717	113.505	-31.7508	-29.0559
37.9717	113.505	-28.4252	-25.4285
37.9717	113.506	-25.0258	-21.8011
37.9717	113.506	-26.9186	-23.6877
37.9717	113.506	-36.3712	-33.5733
37.9717	113.506	-35.8402	-33.1974
37.9717	113.506	-35.7613	-33.129
37.9717	113.506	-24.766	-22.8275
37.9717	113.507	-24.6615	-22.7086
37.9717	113.507	-24.3139	-22.3122
37.9717	113.507	-24.46	-21.9133
37.9717	113.507	-24.8777	-22.0201
37.9717	113.507	-24.6559	-22.3103
37.9717	113.507	-24.5706	-22.3888
37.9716	113.499	0.680633	2.25142
37.9716	113.499	-0.00166177	1.34989
37.9716	113.499	-0.692011	0.448359
37.9716	113.499	-1.55215	-0.664824
37.9716	113.499	-2.82651	-1.97568
37.9716	113.499	-5.76262	-4.81163
37.9716	113.499	-11.0918	-9.82071
37.9716	113.499	-17.868	-16.6289
37.9716	113.5	-24.8192	-23.9369
37.9716	113.5	-30.0338	-29.5248
37.9716	113.5	-35.9479	-35.9895
37.9716	113.5	-40.7092	-40.7553
37.9716	113.5	-45.2846	-44.8565
37.9716	113.5	-45.9695	-45.7557
37.9716	113.5	-46.2162	-46.3287
37.9716	113.5	-46.5987	-46.9018
37.9716	113.501	-48.3626	-48.1693
37.9716	113.501	-50.8195	-50.0209
37.9716	113.501	-53.0368	-51.7434
37.9716	113.501	-52.5203	-51.5951
37.9716	113.501	-50.952	-49.988
37.9716	113.501	-48.4383	-46.489
37.9716	113.501	-49.1857	-47.1916
37.9716	113.502	-49.5571	-47.3952
37.9716	113.502	-44.7555	-41.0066
37.9716	113.502	-43.4355	-39.4749
37.9716	113.502	-42.9	-38.7508
37.9716	113.502	-42.7203	-37.7799
37.9716	113.502	-42.5419	-36.809
37.9716	113.502	-42.7119	-36.5239
37.9716	113.503	-42.705	-36.6203
37.9716	113.503	-42.6687	-36.7167
37.9716	113.503	-42.718	-36.8131
37.9716	113.503	-41.9156	-36.2928
37.9716	113.503	-41.1207	-35.7724
37.9716	113.503	-41.3858	-36.5583
37.9716	113.503	-43.2582	-39.171
37.9716	113.503	-44.6399	-40.8599
37.9716	113.504	-44.3295	-40.1694
37.9716	113.504	-43.0931	-38.5616
37.9716	113.504	-42.6518	-38.2667
37.9716	113.504	-42.6502	-38.7283
37.9716	113.504	-41.964	-38.4843
37.9716	113.504	-38.0155	-37.8513
37.9716	113.504	-36.9645	-36.9108
37.9716	113.504	-36.5356	-36.2867
37.9716	113.505	-38.4481	-35.9517
37.9716	113.505	-38.3627	-36.5298
37.9716	113.505	-37.3428	-37.1079
37.9716	113.505	-37.7266	-36.7119
37.9716	113.505	-37.2957	-36.0268
37.9716	113.505	-37.2909	-35.3417
37.9716	113.505	-34.5252	-32.2668
37.9716	113.505	-31.7014	-29.192
37.9716	113.506	-28.7957	-26.1172
37.9716	113.506	-28.7957	-26.1172
37.9716	113.506	-35.7121	-33.6848
37.9716	113.506	-35.7121	-33.6848
37.9716	113.506	-35.7121	-33.6848
37.9716	113.507	-24.3642	-22.1766
37.9716	113.507	-24.2522	-21.9031
37.9716	113.507	-24.5708	-21.8548
37.9716	113.507	-25.1719	-23.3156
37.9716	113.507	-25.1719	-23.3156
37.9716	113.507	-25.1719	-23.3156
37.9716	113.508	-23.4923	-19.5307
37.9715	113.499	0.622747	1.23134
37.9715	113.499	0.220491	0.648521
37.9715	113.499	-0.202595	0.0657057
37.9715	113.499	-0.908217	-0.836675
37.9715	113.499	-2.23239	-2.1967
37.9715	113.499	-5.26014	-5.06923
37.9715	113.499	-11.1332	-10.5068
37.9715	113.499	-17.2686	-16.4367
37.9715	113.5	-23.6998	-23.0809
37.9715	113.5	-28.2505	-27.9146
37.9715	113.5	-38.0097	-38.1125
37.9715	113.5	-42.4276	-42.6517
37.9715	113.5	-45.9125	-46.1821
37.9715	113.5	-46.4039	-46.8718
37.9715	113.5	-47.1366	-47.6522
37.9715	113.5	-47.9275	-48.4327
37.9715	113.501	-49.1484	-49.2091
37.9715	113.501	-52.0861	-51.2706
37.9715	113.501	-51.8616	-51.1473
37.9715	113.501	-51.3515	-50.7466
37.9715	113.501	-50.6551	-49.8897
37.9715	113.501	-50.0924	-48.5477
37.9715	113.501	-50.055	-47.8644
37.9715	113.502	-50.3396	-47.7501
37.9715	113.502	-49.3236	-46.5234
37.9715	113.502	-42.3679	-38.3556
37.9715	113.502	-41.9831	-37.8271
37.9715	113.502	-42.2486	-37.3315
37.9715	113.502	-41.9569	-36.3789
37.9715	113.502	-41.8022	-35.5871
37.9715	113.503	-41.0461	-35.1948
37.9715	113.503	-41.2374	-35.6245
37.9715	113.503	-41.4579	-36.0542
37.9715	113.503	-43.2323	-37.9033
37.9715	113.503	-44.5295	-39.3874
37.9715	113.503	-45.6389	-41.984
37.9715	113.503	-47.8774	-44.209
37.9715	113.503	-48.911	-45.3979
37.9715	113.504	-48.8285	-44.6308
37.9715	113.504	-47.2956	-42.5822
37.9715	113.504	-45.9021	-41.4007
37.9715	113.504	-45.4429	-41.574
37.9715	113.504	-42.4725	-42.4276
37.9715	113.504	-43.4356	-43.4502
37.9715	113.504	-43.2766	-43.5188
37.9715	113.504	-42.716	-43.0761
37.9715	113.505	-42.6595	-42.8205
37.9715	113.505	-43.0274	-43.1948
37.9715	113.505	-43.3483	-43.5692
37.9715	113.505	-43.5295	-42.2127
37.9715	113.505	-41.8549	-40.6691
37.9715	113.505	-40.2254	-39.1254
37.9715	113.505	-37.4675	-35.9893
37.9715	113.505	-35.194	-33.5374
37.9715	113.506	-32.886	-31.0855
37.9715	113.506	-34.7707	-33.4928
37.9715	113.506	-36.5764	-35.3059
37.9715	113.506	-35.3622	-33.6979
37.9715	113.506	-34.4202	-32.5766
37.9715	113.507	-24.5166	-21.7427
37.9715	113.507	-24.6863	-21.749
37.9715	113.507	-25.2652	-21.77
37.9715	113.507	-25.4347	-21.7763
37.9715	113.507	-25.4353	-23.5332
37.9715	113.507	-25.2798	-23.2969
37.9715	113.507	-24.514	-21.8773
37.9715	113.508	-24.7602	-20.0595
37.9714	113.499	1.99064	1.54844
37.9714	113.499	1.28343	0.699921
37.9714	113.499	0.559584	-0.148601
37.9714	113.499	-1.11867	-1.80456
37.9714	113.499	-2.94869	-3.35968
37.9714	113.499	-7.0185	-6.99276
37.9714	113.499	-11.7056	-11.3753
37.9714	113.499	-16.4784	-16.0019
37.9714	113.5	-23.7996	-23.9562
37.9714	113.5	-44.3278	-45.2402
37.9714	113.5	-45.4994	-46.2361
37.9714	113.5	-45.8917	-46.6127
37.9714	113.5	-47.4619	-48.0756
37.9714	113.5	-49.2388	-49.5386
37.9714	113.501	-50.0382	-49.9472
37.9714	113.501	-50.5667	-50.3426
37.9714	113.501	-51.794	-51.4571
37.9714	113.501	-51.6098	-51.3301
37.9714	113.501	-51.2368	-50.8229
37.9714	113.501	-49.4727	-47.0872
37.9714	113.502	-49.5214	-46.9038
37.9714	113.502	-49.5965	-46.8911
37.9714	113.502	-40.9648	-37.1866
37.9714	113.502	-40.9648	-37.1866
37.9714	113.502	-41.4494	-37.0125
37.9714	113.502	-40.3491	-35.2086
37.9714	113.502	-39.2561	-33.4048
37.9714	113.503	-38.6453	-33.1829
37.9714	113.503	-40.1898	-34.8077
37.9714	113.503	-41.7478	-36.4325
37.9714	113.503	-45.6232	-40.2871
37.9714	113.503	-48.6552	-43.3235
37.9714	113.503	-50.7292	-46.916
37.9714	113.503	-50.308	-48.0284
37.9714	113.503	-50.8176	-48.6828
37.9714	113.504	-52.4091	-48.3188
37.9714	113.504	-51.187	-47.2873
37.9714	113.504	-47.8587	-46.6027
37.9714	113.504	-47.0407	-46.9506
37.9714	113.504	-47.9716	-47.9802
37.9714	113.504	-49.2126	-49.121
37.9714	113.504	-49.8517	-50.0969
37.9714	113.504	-49.9918	-50.5024
37.9714	113.505	-50.5295	-50.9076
37.9714	113.505	-50.8101	-50.8743
37.9714	113.505	-50.8177	-50.841
37.9714	113.505	-49.2546	-48.5537
37.9714	113.505	-46.5099	-45.8935
37.9714	113.505	-43.8147	-43.2334
37.9714	113.505	-40.841	-40
37.9714	113.505	-38.8492	-38.0676
37.9714	113.506	-36.9678	-36.1352
37.9714	113.506	-39.4633	-39.2139
37.9714	113.506	-39.0114	-38.6201
37.9714	113.506	-36.9056	-35.9567
37.9714	113.506	-34.0462	-32.3016
37.9714	113.506	-32.7169	-30.6183
37.9714	113.506	-32.3226	-30.1133
37.9714	113.507	-25.7052	-22.0295
37.9714	113.507	-26.1499	-22.0862
37.9714	113.507	-26.2147	-22.0885
37.9714	113.507	-24.7116	-22.1529
37.9714	113.507	-24.3663	-21.5147
37.9714	113.507	-23.1836	-19.3874
37.9714	113.508	-22.856	-18.7492
37.9714	113.508	-27.2822	-21.5267
37.9714	113.508	-27.2822	-21.5267
37.9712	113.499	4.19044	2.81815
37.9712	113.499	2.80708	1.38949
37.9712	113.499	0.840975	-0.495811
37.9712	113.499	-2.29826	-3.26118
37.9712	113.499	-5.19998	-5.54278
37.9712	113.499	-9.284	-9.14751
37.9712	113.499	-13.7859	-13.5685
37.9712	113.499	-17.0928	-16.9612
37.9712	113.5	-26.1772	-26.8085
37.9712	113.5	-35.8839	-37.2882
37.9712	113.5	-47.8142	-49.4727
37.9712	113.5	-46.4249	-47.6361
37.9712	113.5	-45.3284	-46.2075
37.9712	113.5	-45.8437	-46.7458
37.9712	113.5	-49.8581	-50.1607
37.9712	113.501	-50.7037	-50.4113
37.9712	113.501	-50.7841	-50.4567
37.9712	113.501	-52.9626	-53.1375
37.9712	113.501	-52.9626	-53.1375
37.9712	113.501	-52.9626	-53.1375
37.9712	113.501	-47.4042	-45.4014
37.9712	113.502	-47.4042	-45.4014
37.9712	113.502	-47.4042	-45.4014
37.9712	113.502	-40.6702	-37.3284
37.9712	113.502	-40.7908	-37.4818
37.9712	113.502	-41.9309	-38.182
37.9712	113.502	-37.8013	-32.9447
37.9712	113.503	-36.9915	-32.153
37.9712	113.503	-40.4786	-35.3844
37.9712	113.503	-44.0579	-38.6159
37.9712	113.503	-48.3735	-42.9398
37.9712	113.503	-50.6777	-45.3795
37.9712	113.503	-53.0565	-48.2697
37.9712	113.503	-51.8208	-49.1709
37.9712	113.503	-52.6571	-50.7833
37.9712	113.504	-55.0926	-52.393
37.9712	113.504	-54.0195	-53.5535
37.9712	113.504	-53.6453	-54.0044
37.9712	113.504	-53.829	-54.3175
37.9712	113.504	-54.5103	-54.9395
37.9712	113.504	-55.5972	-55.56
37.9712	113.504	-56.5252	-56.7343
37.9712	113.504	-57.0505	-57.5985
37.9712	113.505	-58.0975	-58.4
37.9712	113.505	-57.2379	-57.2399
37.9712	113.505	-56.5466	-56.0799
37.9712	113.505	-53.0396	-52.7055
37.9712	113.505	-49.8141	-49.4856
37.9712	113.505	-46.6841	-46.2658
37.9712	113.505	-43.9458	-43.3506
37.9712	113.506	-40.4978	-40.3896
37.9712	113.506	-42.3849	-42.5525
37.9712	113.506	-41.8148	-41.742
37.9712	113.506	-32.3622	-30.0949
37.9712	113.506	-31.5171	-28.9624
37.9712	113.506	-31.5835	-28.8854
37.9712	113.507	-26.967	-22.6836
37.9712	113.507	-26.967	-22.6836
37.9712	113.507	-26.967	-22.6836
37.9712	113.507	-23.3742	-19.3785
37.9712	113.507	-22.7159	-18.0179
37.9712	113.508	-22.5987	-17.7815
37.9712	113.508	-25.6695	-19.5495
37.9712	113.508	-25.4914	-19.4284
37.9711	113.499	6.26507	4.2382
37.9711	113.499	4.01445	1.97116
37.9711	113.499	0.399622	-1.13758
37.9711	113.499	-4.69494	-5.44405
37.9711	113.499	-8.84137	-8.79342
37.9711	113.499	-13.0534	-12.6491
37.9711	113.499	-17.2197	-16.9398
37.9711	113.499	-20.2658	-20.2052
37.9711	113.5	-30.4625	-31.2336
37.9711	113.5	-39.1941	-40.6293
37.9711	113.5	-47.5306	-49.2361
37.9711	113.5	-46.9434	-48.3274
37.9711	113.5	-46.3645	-47.4188
37.9711	113.5	-47.1313	-48.0836
37.9711	113.5	-48.8344	-49.3434
37.9711	113.5	-50.4241	-50.6032
37.9711	113.501	-50.7654	-50.6585
37.9711	113.501	-50.7654	-50.6585
37.9711	113.501	-55.182	-55.6837
37.9711	113.501	-55.3651	-55.8731
37.9711	113.501	-56.7823	-57.2049
37.9711	113.501	-48.0419	-47.2757
37.9711	113.502	-46.0926	-44.9071
37.9711	113.502	-47.4448	-46.3077
37.9711	113.502	-43.5899	-40.6116
37.9711	113.502	-42.0918	-38.7805
37.9711	113.502	-43.5988	-40.1617
37.9711	113.502	-40.9153	-37.2767
37.9711	113.502	-38.2916	-34.3916
37.9711	113.503	-38.8073	-34.402
37.9711	113.503	-44.0899	-39.1381
37.9711	113.503	-48.9599	-43.4241
37.9711	113.503	-50.5858	-45.2363
37.9711	113.503	-49.7931	-44.9369
37.9711	113.503	-51.0563	-46.8526
37.9711	113.503	-52.0773	-49.538
37.9711	113.503	-55.2389	-53.7811
37.9711	113.504	-59.3637	-57.9462
37.9711	113.504	-60.6735	-60.7442
37.9711	113.504	-60.9787	-61.5378
37.9711	113.504	-60.3811	-61.1438
37.9711	113.504	-60.6981	-61.6962
37.9711	113.504	-62.2624	-62.6952
37.9711	113.504	-62.5184	-62.8808
37.9711	113.504	-61.9639	-62.5669
37.9711	113.505	-61.5944	-62.0761
37.9711	113.505	-60.0325	-59.869
37.9711	113.505	-57.737	-57.6619
37.9711	113.505	-54.0824	-54.093
37.9711	113.505	-51.2928	-51.2592
37.9711	113.505	-48.6231	-48.4254
37.9711	113.505	-48.1694	-47.8695
37.9711	113.506	-45.1548	-45.2708
37.9711	113.506	-44.0933	-44.0986
37.9711	113.506	-44.0933	-44.0986
37.9711	113.506	-31.2539	-28.42
37.9711	113.506	-31.3898	-28.5017
37.9711	113.506	-31.7718	-28.7741
37.9711	113.506	-31.8944	-28.8558
37.9711	113.507	-27.5982	-23.4555
37.9711	113.507	-27.5982	-23.4555
37.9711	113.507	-27.5982	-23.4555
37.9711	113.507	-23.6198	-18.8246
37.9711	113.507	-23.6198	-18.8246
37.9711	113.508	-23.6198	-18.8246
37.9711	113.508	-22.9669	-16.8456
37.9711	113.508	-22.9669	-16.8456
37.9711	113.508	-22.729	-16.9529
37.971	113.498	7.24881	5.67394
37.971	113.499	6.75863	4.83961
37.971	113.499	3.55438	1.84293
37.971	113.499	-1.34385	-2.28792
37.971	113.499	-7.19396	-7.32691
37.971	113.499	-11.7807	-11.3335
37.971	113.499	-15.8172	-15.3071
37.971	113.499	-20.577	-20.26
37.971	113.499	-24.2328	-24.035
37.971	113.5	-32.6445	-33.1325
37.971	113.5	-39.2687	-40.3424
37.971	113.5	-45.7093	-47.1579
37.971	113.5	-46.8034	-48.052
37.971	113.5	-47.9172	-48.9461
37.971	113.5	-49.6251	-50.5833
37.971	113.5	-50.1597	-50.7465
37.971	113.5	-50.8553	-51.204
37.971	113.501	-51.1551	-51.3128
37.971	113.501	-51.8547	-52.2425
37.971	113.501	-57.1656	-57.8008
37.971	113.501	-58.2806	-58.6615
37.971	113.501	-60.1838	-60.366
37.971	113.501	-55.6334	-55.8336
37.971	113.501	-50.9928	-50.6984
37.971	113.502	-47.3053	-46.4548
37.971	113.502	-49.5894	-48.6085
37.971	113.502	-48.5103	-47.1637
37.971	113.502	-45.3354	-41.9757
37.971	113.502	-46.626	-43.1604
37.971	113.502	-43.9079	-40.5015
37.971	113.502	-41.2826	-37.8426
37.971	113.503	-41.1123	-37.2929
37.971	113.503	-47.3958	-42.764
37.971	113.503	-52.0918	-46.8254
37.971	113.503	-51.8946	-46.8483
37.971	113.503	-48.1491	-43.8164
37.971	113.503	-50.4129	-46.9877
37.971	113.503	-54.3182	-52.5514
37.971	113.503	-61.0246	-59.9347
37.971	113.504	-65.1347	-64.4118
37.971	113.504	-67.1452	-67.2894
37.971	113.504	-67.0256	-67.6157
37.971	113.504	-66.13	-66.9409
37.971	113.504	-66.7052	-67.9815
37.971	113.504	-68.6881	-69.7538
37.971	113.504	-67.5495	-68.0929
37.971	113.504	-64.7951	-65.5459
37.971	113.505	-62.3882	-62.9989
37.971	113.505	-60.6101	-60.5436
37.971	113.505	-57.9712	-58.0884
37.971	113.505	-54.5089	-54.7618
37.971	113.505	-52.4992	-52.7033
37.971	113.505	-50.5909	-50.6448
37.971	113.505	-50.4405	-50.1692
37.971	113.505	-48.2335	-48.2263
37.971	113.506	-46.4831	-46.3429
37.971	113.506	-44.4927	-44.3823
37.971	113.506	-44.6664	-44.5613
37.971	113.506	-31.9805	-29.0203
37.971	113.506	-32.2864	-29.2353
37.971	113.506	-32.3234	-29.2656
37.971	113.507	-28.0077	-24.1169
37.971	113.507	-28.0077	-24.1169
37.971	113.507	-28.0077	-24.1169
37.971	113.507	-26.3375	-22.9518
37.971	113.507	-25.4418	-21.4517
37.971	113.508	-25.9669	-22.0067
37.971	113.508	-22.6246	-17.4559
37.971	113.508	-20.8646	-15.2085
37.971	113.508	-20.7411	-15.5374
37.971	113.508	-20.9968	-16.1108
37.9709	113.498	7.49198	6.13565
37.9709	113.499	6.14473	4.89993
37.9709	113.499	1.83021	1.1194
37.9709	113.499	-3.63231	-3.64557
37.9709	113.499	-9.76257	-9.22403
37.9709	113.499	-13.9278	-13.219
37.9709	113.499	-18.1175	-17.5996
37.9709	113.499	-23.5211	-23.2756
37.9709	113.499	-28.4633	-28.1526
37.9709	113.5	-35.1619	-35.4607
37.9709	113.5	-39.8741	-40.66
37.9709	113.5	-44.648	-45.8593
37.9709	113.5	-47.1662	-48.2288
37.9709	113.5	-49.6904	-50.5983
37.9709	113.5	-52.2416	-52.9678
37.9709	113.5	-51.8644	-52.4151
37.9709	113.5	-52.0641	-52.5794
37.9709	113.501	-52.23	-52.7436
37.9709	113.501	-53.3922	-54.068
37.9709	113.501	-54.0235	-54.7385
37.9709	113.501	-59.3016	-59.745
37.9709	113.501	-60.417	-60.7305
37.9709	113.501	-58.0549	-58.392
37.9709	113.502	-49.7807	-49.0322
37.9709	113.502	-51.3325	-50.4788
37.9709	113.502	-51.6101	-50.7181
37.9709	113.502	-50.1102	-46.8558
37.9709	113.502	-50.1102	-46.8558
37.9709	113.502	-46.8863	-43.7573
37.9709	113.502	-43.6793	-40.6587
37.9709	113.503	-43.7976	-40.3648
37.9709	113.503	-50.4167	-46.0798
37.9709	113.503	-54.6313	-49.6726
37.9709	113.503	-53.245	-48.5842
37.9709	113.503	-49.2846	-45.53
37.9709	113.503	-53.2188	-50.7626
37.9709	113.503	-59.7072	-58.8294
37.9709	113.503	-68.3292	-66.919
37.9709	113.504	-71.7479	-71.0605
37.9709	113.504	-72.9372	-72.9855
37.9709	113.504	-72.9855	-73.3604
37.9709	113.504	-72.104	-72.5395
37.9709	113.504	-73.0766	-73.9981
37.9709	113.504	-74.8785	-76.0395
37.9709	113.504	-70.6438	-71.6858
37.9709	113.504	-65.3412	-66.3113
37.9709	113.505	-60.142	-60.9369
37.9709	113.505	-58.3867	-59.0143
37.9709	113.505	-57.0203	-57.0918
37.9709	113.505	-54.6301	-54.8351
37.9709	113.505	-53.1992	-53.4979
37.9709	113.505	-51.9929	-52.1607
37.9709	113.505	-51.6963	-51.4739
37.9709	113.505	-50.0095	-49.8153
37.9709	113.506	-47.7301	-47.4469
37.9709	113.506	-44.9521	-44.7226
37.9709	113.506	-45.2042	-44.9607
37.9709	113.506	-45.4088	-45.0322
37.9709	113.506	-32.6275	-29.704
37.9709	113.506	-32.6275	-29.704
37.9709	113.506	-32.6275	-29.704
37.9709	113.507	-29.8081	-26.8046
37.9709	113.507	-29.8081	-26.8046
37.9709	113.507	-29.8081	-26.8046
37.9709	113.507	-28.8549	-26.965
37.9709	113.507	-28.5222	-26.3744
37.9709	113.507	-27.3427	-24.4058
37.9709	113.508	-27.8083	-24.625
37.9709	113.508	-26.51	-22.4067
37.9709	113.508	-26.0762	-21.823
37.9709	113.508	-23.3502	-18.6094
37.9709	113.508	-22.2161	-17.7952
37.9709	113.508	-21.182	-16.9649
37.9707	113.498	5.6866	4.66265
37.9707	113.499	2.67384	2.27154
37.9707	113.499	-2.81884	-2.36432
37.9707	113.499	-7.61344	-6.85384
37.9707	113.499	-12.9202	-11.9387
37.9707	113.499	-16.8151	-15.7799
37.9707	113.499	-21.0949	-20.3015
37.9707	113.499	-26.9336	-26.4936
37.9707	113.499	-31.9929	-31.6845
37.9707	113.5	-37.6797	-38.0275
37.9707	113.5	-41.3642	-42.1048
37.9707	113.5	-45.027	-46.1821
37.9707	113.5	-48.0724	-49.0064
37.9707	113.5	-51.3161	-51.9824
37.9707	113.5	-54.6033	-54.9584
37.9707	113.5	-54.8761	-54.9559
37.9707	113.501	-54.3185	-54.9735
37.9707	113.501	-54.5323	-55.4153
37.9707	113.501	-54.6433	-55.546
37.9707	113.501	-57.1845	-58.1872
37.9707	113.501	-57.7321	-58.6186
37.9707	113.501	-57.7321	-58.6186
37.9707	113.502	-51.0058	-50.6297
37.9707	113.502	-51.0058	-50.6297
37.9707	113.502	-49.4214	-48.9139
37.9707	113.502	-49.1273	-46.4835
37.9707	113.502	-50.8951	-48.1678
37.9707	113.502	-48.1582	-45.5669
37.9707	113.502	-45.4599	-42.966
37.9707	113.503	-45.4471	-42.5589
37.9707	113.503	-52.4346	-48.6984
37.9707	113.503	-57.0858	-52.7238
37.9707	113.503	-56.7095	-52.4238
37.9707	113.503	-53.887	-50.4877
37.9707	113.503	-58.0168	-56.4724
37.9707	113.503	-66.0881	-65.2202
37.9707	113.503	-74.3	-73.0081
37.9707	113.504	-76.6233	-76.1181
37.9707	113.504	-76.8299	-76.929
37.9707	113.504	-76.4513	-76.6663
37.9707	113.504	-75.9287	-76.0063
37.9707	113.504	-76.7799	-77.3715
37.9707	113.504	-78.096	-78.8343
37.9707	113.504	-71.65	-72.7477
37.9707	113.504	-64.7182	-65.9297
37.9707	113.505	-58.0338	-59.1116
37.9707	113.505	-56.8561	-57.7038
37.9707	113.505	-56.3747	-56.296
37.9707	113.505	-54.8846	-54.8882
37.9707	113.505	-53.6961	-53.8292
37.9707	113.505	-52.7111	-52.7701
37.9707	113.505	-51.783	-51.7111
37.9707	113.505	-50.8627	-50.6617
37.9707	113.506	-45.1546	-44.7328
37.9707	113.506	-45.3594	-44.847
37.9707	113.506	-45.4203	-44.8734
37.9707	113.506	-33.9861	-31.5393
37.9707	113.506	-33.9861	-31.5393
37.9707	113.506	-33.9861	-31.5393
37.9707	113.507	-33.3512	-31.6288
37.9707	113.507	-33.3512	-31.6288
37.9707	113.507	-33.3692	-31.8897
37.9707	113.507	-30.9788	-29.9443
37.9707	113.507	-30.175	-28.9111
37.9707	113.507	-29.4216	-27.6374
37.9707	113.508	-29.0421	-25.9065
37.9707	113.508	-28.9432	-25.5355
37.9707	113.508	-25.9129	-22.1683
37.9707	113.508	-23.643	-19.8823
37.9707	113.508	-21.4336	-17.7542
37.9707	113.508	-22.4179	-19.3306
37.9706	113.498	3.50425	2.57698
37.9706	113.499	-1.8732	-1.79152
37.9706	113.499	-9.08864	-8.00625
37.9706	113.499	-12.7276	-11.6987
37.9706	113.499	-16.9161	-15.8492
37.9706	113.499	-20.0924	-18.819
37.9706	113.499	-24.0666	-22.8336
37.9706	113.499	-28.4598	-27.8232
37.9706	113.499	-32.1262	-32.1472
37.9706	113.5	-36.1102	-36.8612
37.9706	113.5	-39.9876	-40.9633
37.9706	113.5	-43.7758	-45.0654
37.9706	113.5	-45.9747	-47.0788
37.9706	113.5	-50.2031	-50.738
37.9706	113.5	-54.3643	-54.3971
37.9706	113.5	-57.6758	-57.2052
37.9706	113.5	-57.1061	-57.0227
37.9706	113.501	-56.0158	-56.5782
37.9706	113.501	-54.9232	-55.8837
37.9706	113.501	-54.8516	-55.7698
37.9706	113.501	-54.5738	-55.7407
37.9706	113.501	-54.3371	-55.7846
37.9706	113.501	-54.5393	-55.879
37.9706	113.501	-54.5602	-55.8781
37.9706	113.502	-49.4852	-49.8192
37.9706	113.502	-48.7446	-48.8751
37.9706	113.502	-46.4772	-46.3111
37.9706	113.502	-46.0652	-44.8762
37.9706	113.502	-45.6997	-43.4413
37.9706	113.502	-48.3671	-46.1696
37.9706	113.502	-47.3891	-45.3488
37.9706	113.502	-46.5027	-44.5281
37.9706	113.503	-48.8257	-46.3511
37.9706	113.503	-55.6688	-52.2914
37.9706	113.503	-60.7782	-56.7715
37.9706	113.503	-60.281	-56.5358
37.9706	113.503	-59.937	-57.1273
37.9706	113.503	-63.4121	-62.5532
37.9706	113.503	-70.6203	-70.2293
37.9706	113.503	-76.4726	-75.8488
37.9706	113.504	-79.0434	-78.8995
37.9706	113.504	-78.9756	-79.3521
37.9706	113.504	-78.3871	-78.8584
37.9706	113.504	-77.4176	-77.8297
37.9706	113.504	-77.7326	-78.3704
37.9706	113.504	-78.3191	-78.911
37.9706	113.504	-70.9977	-72.1385
37.9706	113.504	-63.5557	-64.9027
37.9706	113.505	-56.4008	-57.667
37.9706	113.505	-55.5275	-56.5493
37.9706	113.505	-55.284	-55.4854
37.9706	113.505	-54.6987	-54.4214
37.9706	113.505	-53.5551	-53.3173
37.9706	113.505	-52.4486	-52.3193
37.9706	113.505	-51.5336	-51.3213
37.9706	113.505	-51.4089	-51.2403
37.9706	113.506	-45.5148	-45.1841
37.9706	113.506	-44.7079	-44.2226
37.9706	113.506	-44.7079	-44.2226
37.9706	113.506	-36.5174	-34.6885
37.9706	113.506	-36.5174	-34.6885
37.9706	113.506	-37.3819	-36.187
37.9706	113.507	-39.0141	-38.4832
37.9706	113.507	-37.7288	-37.0014
37.9706	113.507	-36.7154	-35.9775
37.9706	113.507	-34.273	-33.7364
37.9706	113.507	-32.4664	-31.9071
37.9706	113.507	-31.6371	-30.8753
37.9706	113.507	-31.2606	-30.2592
37.9706	113.508	-30.6036	-28.8364
37.9706	113.508	-30.6486	-28.4268
37.9706	113.508	-30.3762	-27.716
37.9706	113.508	-27.0907	-24.1806
37.9706	113.508	-23.8429	-20.5798
37.9706	113.508	-21.9372	-18.8485
37.9706	113.508	-23.1429	-20.7251
37.9706	113.508	-24.2245	-22.5358
37.9705	113.498	2.22792	1.09611
37.9705	113.499	-5.55423	-5.50009
37.9705	113.499	-14.4052	-13.3627
37.9705	113.499	-16.6378	-15.8954
37.9705	113.499	-19.6748	-18.9946
37.9705	113.499	-22.7006	-21.6014
37.9705	113.499	-25.9137	-24.5141
37.9705	113.499	-27.9567	-27.3165
37.9705	113.499	-28.9817	-29.3449
37.9705	113.5	-30.8971	-31.723
37.9705	113.5	-35.1984	-36.1083
37.9705	113.5	-38.9992	-40.4935
37.9705	113.5	-41.6676	-43.114
37.9705	113.5	-47.5375	-48.0531
37.9705	113.5	-52.9279	-52.6696
37.9705	113.5	-58.1104	-57.2807
37.9705	113.5	-56.8783	-56.3353
37.9705	113.501	-53.809	-54.6909
37.9705	113.501	-53.7447	-54.8162
37.9705	113.501	-53.4452	-54.6812
37.9705	113.501	-53.1352	-54.7027
37.9705	113.501	-53.3126	-54.7527
37.9705	113.501	-53.6547	-55.045
37.9705	113.501	-50.8021	-51.9237
37.9705	113.502	-48.0658	-48.8025
37.9705	113.502	-46.1405	-46.5755
37.9705	113.502	-44.4577	-44.6147
37.9705	113.502	-44.1479	-43.3683
37.9705	113.502	-44.0102	-42.3793
37.9705	113.502	-46.0904	-44.6287
37.9705	113.502	-46.9075	-45.5164
37.9705	113.502	-48.5809	-46.9869
37.9705	113.503	-53.3607	-50.9709
37.9705	113.503	-60.0683	-56.7618
37.9705	113.503	-64.1202	-60.776
37.9705	113.503	-62.8985	-60.4042
37.9705	113.503	-63.5947	-62.574
37.9705	113.503	-66.9648	-67.4184
37.9705	113.503	-73.924	-73.7391
37.9705	113.503	-77.4407	-77.2398
37.9705	113.504	-78.7529	-79.0028
37.9705	113.504	-78.3651	-79.0898
37.9705	113.504	-77.4375	-78.2953
37.9705	113.504	-76.5668	-77.4348
37.9705	113.504	-75.7094	-76.8187
37.9705	113.504	-75.2564	-76.2026
37.9705	113.504	-69.6314	-70.7547
37.9705	113.504	-62.7963	-64.133
37.9705	113.505	-56.2072	-57.5114
37.9705	113.505	-54.1914	-55.332
37.9705	113.505	-54.4902	-54.4591
37.9705	113.505	-54.0385	-53.5862
37.9705	113.505	-53.0759	-52.5569
37.9705	113.505	-52.1772	-51.8457
37.9705	113.505	-51.4162	-51.1346
37.9705	113.505	-51.1901	-51.0148
37.9705	113.506	-48.4274	-48.282
37.9705	113.506	-45.6499	-45.5493
37.9705	113.506	-44.2127	-43.7481
37.9705	113.506	-44.2127	-43.7481
37.9705	113.506	-38.822	-37.5272
37.9705	113.506	-38.822	-37.5272
37.9705	113.506	-40.1295	-39.4398
37.9705	113.507	-41.3427	-41.0735
37.9705	113.507	-42.7512	-42.7072
37.9705	113.507	-41.4691	-41.0602
37.9705	113.507	-38.2409	-37.8994
37.9705	113.507	-34.988	-34.4806
37.9705	113.507	-33.2876	-32.9963
37.9705	113.507	-32.7425	-32.2756
37.9705	113.508	-30.6485	-29.2138
37.9705	113.508	-30.6893	-29.1158
37.9705	113.508	-29.9261	-27.9996
37.9705	113.508	-24.3086	-21.5029
37.9705	113.508	-23.1176	-20.7083
37.9705	113.508	-23.9786	-22.3311
37.9705	113.508	-24.6939	-23.835
37.9704	113.498	1.19178	-0.322903
37.9704	113.499	-7.75548	-7.91612
37.9704	113.499	-17.1951	-16.2753
37.9704	113.499	-18.23	-17.8073
37.9704	113.499	-20.3717	-20.2333
37.9704	113.499	-23.1323	-22.7875
37.9704	113.499	-26.0606	-25.3618
37.9704	113.499	-26.8157	-26.7024
37.9704	113.499	-26.5633	-27.149
37.9704	113.5	-26.8954	-27.4501
37.9704	113.5	-30.8474	-31.684
37.9704	113.5	-34.5273	-35.9179
37.9704	113.5	-37.3071	-38.893
37.9704	113.5	-42.7567	-43.4952
37.9704	113.5	-49.6565	-49.4259
37.9704	113.5	-56.97	-56.0521
37.9704	113.5	-55.442	-54.6007
37.9704	113.501	-53.7475	-53.7653
37.9704	113.501	-52.0553	-52.9298
37.9704	113.501	-51.8532	-53.0986
37.9704	113.501	-51.8786	-53.2723
37.9704	113.501	-53.9115	-55.3804
37.9704	113.501	-54.2347	-55.6231
37.9704	113.501	-51.4466	-52.7678
37.9704	113.502	-48.7271	-49.9126
37.9704	113.502	-46.095	-46.9924
37.9704	113.502	-45.3843	-46.2753
37.9704	113.502	-45.3661	-45.5582
37.9704	113.502	-45.8443	-45.1388
37.9704	113.502	-47.1272	-46.381
37.9704	113.502	-48.3635	-47.6231
37.9704	113.502	-52.7163	-51.0878
37.9704	113.503	-59.4954	-56.4514
37.9704	113.503	-64.2435	-61.1756
37.9704	113.503	-64.2462	-62.6123
37.9704	113.503	-61.5499	-61.6255
37.9704	113.503	-64.2818	-65.2377
37.9704	113.503	-70.0171	-70.3633
37.9704	113.503	-76.3524	-75.7734
37.9704	113.503	-77.784	-77.6884
37.9704	113.504	-78.2364	-78.8572
37.9704	113.504	-77.634	-78.5014
37.9704	113.504	-76.6955	-77.6811
37.9704	113.504	-75.5846	-76.7046
37.9704	113.504	-73.8546	-75.0407
37.9704	113.504	-72.3261	-73.3767
37.9704	113.504	-68.4046	-69.3775
37.9704	113.504	-63.188	-64.3488
37.9704	113.505	-58.1756	-59.32
37.9704	113.505	-55.4487	-56.6309
37.9704	113.505	-55.0247	-55.6448
37.9704	113.505	-55.0393	-54.6588
37.9704	113.505	-54.1902	-53.6206
37.9704	113.505	-53.1327	-52.7473
37.9704	113.505	-52.1351	-51.8741
37.9704	113.505	-51.2689	-51.1957
37.9704	113.506	-48.9368	-48.7588
37.9704	113.506	-46.6392	-46.322
37.9704	113.506	-44.4408	-43.8944
37.9704	113.506	-44.4408	-43.8944
37.9704	113.506	-39.7592	-38.7416
37.9704	113.506	-39.7592	-38.7416
37.9704	113.506	-40.9725	-40.6583
37.9704	113.507	-42.182	-42.2091
37.9704	113.507	-43.4559	-43.7599
37.9704	113.507	-42.5552	-42.7075
37.9704	113.507	-35.8817	-35.7473
37.9704	113.507	-35.2778	-35.2735
37.9704	113.507	-35.2778	-35.2735
37.9704	113.508	-30.3703	-29.3092
37.9704	113.508	-30.3703	-29.3092
37.9704	113.508	-29.175	-27.8818
37.9704	113.508	-26.954	-25.1212
37.9704	113.508	-24.5726	-22.4015
37.9704	113.508	-23.9715	-22.4786
37.9704	113.508	-23.9561	-23.2915
37.9704	113.508	-24.0673	-23.9188
37.9704	113.509	-24.1593	-24.0675
37.9702	113.498	0.083122	-2.00618
37.9702	113.499	-8.228	-8.83678
37.9702	113.499	-16.8412	-16.3205
37.9702	113.499	-17.5971	-17.6269
37.9702	113.499	-19.8706	-20.2573
37.9702	113.499	-23.1882	-23.5586
37.9702	113.499	-26.0964	-26.2067
37.9702	113.499	-27.4844	-27.6918
37.9702	113.499	-27.4724	-27.8529
37.9702	113.5	-28.0034	-28.014
37.9702	113.5	-31.2074	-31.4038
37.9702	113.5	-33.979	-34.7936
37.9702	113.5	-37.1354	-38.1835
37.9702	113.5	-40.3878	-41.0471
37.9702	113.5	-53.0856	-52.3193
37.9702	113.5	-51.7092	-51.0118
37.9702	113.501	-50.7549	-50.678
37.9702	113.501	-49.7215	-50.3442
37.9702	113.501	-49.0715	-50.3329
37.9702	113.501	-49.0715	-50.3329
37.9702	113.501	-54.9351	-56.2921
37.9702	113.501	-54.9351	-56.2921
37.9702	113.501	-53.0197	-54.4184
37.9702	113.502	-51.1869	-52.5447
37.9702	113.502	-49.4926	-50.6711
37.9702	113.502	-48.9573	-50.1104
37.9702	113.502	-48.8845	-49.5496
37.9702	113.502	-49.3038	-49.5234
37.9702	113.502	-49.7839	-50.3733
37.9702	113.502	-51.2346	-51.2367
37.9702	113.502	-55.4308	-54.7956
37.9702	113.503	-60.1633	-58.9869
37.9702	113.503	-63.9421	-62.6576
37.9702	113.503	-62.0953	-62.0864
37.9702	113.503	-61.5623	-62.1407
37.9702	113.503	-66.3567	-66.5955
37.9702	113.503	-72.6115	-72.0622
37.9702	113.503	-78.2999	-77.318
37.9702	113.503	-78.9178	-78.851
37.9702	113.504	-79.6292	-80.3839
37.9702	113.504	-77.6184	-78.409
37.9702	113.504	-75.3039	-76.2634
37.9702	113.504	-73.1314	-74.0825
37.9702	113.504	-71.6334	-72.6386
37.9702	113.504	-70.2034	-71.1947
37.9702	113.504	-68.4954	-69.3374
37.9702	113.504	-65.2025	-66.2449
37.9702	113.505	-61.9777	-63.1524
37.9702	113.505	-59.271	-60.5086
37.9702	113.505	-58.5451	-59.2581
37.9702	113.505	-58.223	-58.0076
37.9702	113.505	-57.304	-56.7571
37.9702	113.505	-55.4362	-55.0468
37.9702	113.505	-53.6041	-53.3365
37.9702	113.505	-51.7665	-51.6262
37.9702	113.506	-49.4846	-49.2194
37.9702	113.506	-47.6123	-47.2057
37.9702	113.506	-45.7548	-45.1919
37.9702	113.506	-46.837	-46.4636
37.9702	113.506	-42.0947	-41.4766
37.9702	113.506	-40.5208	-39.7666
37.9702	113.506	-41.109	-40.8844
37.9702	113.507	-41.7506	-42.0022
37.9702	113.507	-42.5434	-43.12
37.9702	113.507	-42.5434	-43.12
37.9702	113.507	-36.8624	-37.0922
37.9702	113.507	-36.8624	-37.0922
37.9702	113.507	-35.1194	-35.1608
37.9702	113.508	-28.3028	-27.5914
37.9702	113.508	-29.2735	-28.4933
37.9702	113.508	-28.3147	-27.17
37.9702	113.508	-27.389	-25.8467
37.9702	113.508	-25.6721	-24.1334
37.9702	113.508	-24.7803	-24.149
37.9702	113.508	-23.7441	-23.9563
37.9702	113.508	-23.1603	-23.7133
37.9702	113.509	-22.8001	-23.1794
37.9701	113.498	-0.624138	-3.05644
37.9701	113.499	-7.99383	-9.07503
37.9701	113.499	-15.9221	-15.9421
37.9701	113.499	-17.2062	-17.6389
37.9701	113.499	-20.4272	-20.8087
37.9701	113.499	-24.0519	-24.603
37.9701	113.499	-26.817	-27.5488
37.9701	113.499	-29.5073	-29.886
37.9701	113.499	-31.0034	-30.8738
37.9701	113.5	-32.1669	-31.8615
37.9701	113.5	-34.1166	-34.0415
37.9701	113.5	-35.7849	-35.9079
37.9701	113.5	-37.4114	-37.7743
37.9701	113.5	-36.5477	-36.8175
37.9701	113.5	-44.7967	-44.2479
37.9701	113.5	-46.8651	-46.253
37.9701	113.501	-46.9066	-46.6026
37.9701	113.501	-46.8651	-46.9523
37.9701	113.501	-46.7263	-47.3019
37.9701	113.501	-48.5324	-49.0827
37.9701	113.501	-56.823	-57.6316
37.9701	113.501	-55.7952	-56.8157
37.9701	113.501	-54.8778	-55.8162
37.9701	113.502	-54.073	-54.8167
37.9701	113.502	-53.621	-54.1356
37.9701	113.502	-52.2289	-52.8279
37.9701	113.502	-51.1826	-51.5201
37.9701	113.502	-51.4476	-51.4967
37.9701	113.502	-52.4464	-52.7981
37.9701	113.502	-53.8575	-53.9961
37.9701	113.502	-56.7827	-56.3246
37.9701	113.503	-59.8432	-58.4943
37.9701	113.503	-61.7621	-60.6193
37.9701	113.503	-60.3688	-59.6483
37.9701	113.503	-61.8624	-61.4873
37.9701	113.503	-66.8052	-66.343
37.9701	113.503	-72.7536	-72.0217
37.9701	113.503	-77.3563	-76.6488
37.9701	113.503	-78.6718	-78.5429
37.9701	113.504	-79.9948	-80.437
37.9701	113.504	-76.7149	-76.9994
37.9701	113.504	-72.8358	-73.4263
37.9701	113.504	-69.3186	-69.8532
37.9701	113.504	-69.0979	-69.7884
37.9701	113.504	-68.9633	-69.7237
37.9701	113.504	-68.9034	-69.6589
37.9701	113.504	-66.9491	-68.0436
37.9701	113.505	-65.0827	-66.2932
37.9701	113.505	-63.4547	-64.5427
37.9701	113.505	-62.3248	-63.0961
37.9701	113.505	-61.8504	-61.6824
37.9701	113.505	-60.6896	-60.2688
37.9701	113.505	-58.2113	-57.8446
37.9701	113.505	-55.8459	-55.5226
37.9701	113.505	-53.4416	-53.2005
37.9701	113.506	-51.4005	-51.0657
37.9701	113.506	-49.5204	-49.1901
37.9701	113.506	-47.6131	-47.3145
37.9701	113.506	-49.094	-49.0831
37.9701	113.506	-46.7995	-46.8436
37.9701	113.506	-44.6314	-44.6041
37.9701	113.506	-42.3507	-42.2267
37.9701	113.506	-42.1008	-42.3282
37.9701	113.507	-41.9334	-42.4296
37.9701	113.507	-41.8621	-42.531
37.9701	113.507	-41.8621	-42.531
37.9701	113.507	-38.9204	-39.3053
37.9701	113.507	-38.9204	-39.3053
37.9701	113.507	-35.2913	-35.372
37.9701	113.507	-30.6137	-30.5134
37.9701	113.508	-26.2758	-25.6548
37.9701	113.508	-27.7271	-27.0452
37.9701	113.508	-27.8047	-26.8205
37.9701	113.508	-27.894	-26.5958
37.9701	113.508	-26.0106	-25.1284
37.9701	113.508	-24.5579	-24.664
37.9701	113.508	-22.9799	-23.9311
37.9701	113.508	-22.5331	-23.5611
37.9701	113.509	-22.0921	-22.7667
37.9701	113.509	-20.222	-20.0179
37.97	113.498	-0.185706	-2.71501
37.97	113.499	-6.74025	-8.33556
37.97	113.499	-13.885	-14.5388
37.97	113.499	-16.3496	-16.8043
37.97	113.499	-20.3567	-20.4585
37.97	113.499	-24.1762	-24.3475
37.97	113.499	-26.7998	-27.3557
37.97	113.499	-29.4348	-29.6289
37.97	113.499	-31.7391	-31.4792
37.97	113.5	-33.8314	-33.3296
37.97	113.5	-35.8247	-35.4527
37.97	113.5	-36.0161	-35.8091
37.97	113.5	-36.2642	-36.1655
37.97	113.5	-34.8703	-34.7508
37.97	113.5	-37.505	-37.2047
37.97	113.5	-39.6215	-39.2449
37.97	113.5	-41.7968	-41.4036
37.97	113.501	-42.1464	-41.8062
37.97	113.501	-42.8466	-42.5076
37.97	113.501	-43.567	-43.209
37.97	113.501	-45.8893	-45.5751
37.97	113.501	-51.3709	-51.3104
37.97	113.501	-56.8893	-57.0457
37.97	113.501	-56.6868	-57.0541
37.97	113.501	-55.5519	-55.7592
37.97	113.502	-54.5599	-54.4643
37.97	113.502	-54.2098	-54.1242
37.97	113.502	-52.4085	-52.4896
37.97	113.502	-50.8557	-50.7381
37.97	113.502	-51.359	-50.9466
37.97	113.502	-53.1938	-52.4831
37.97	113.502	-55.0398	-54.0649
37.97	113.502	-55.5572	-54.4458
37.97	113.503	-55.7607	-54.7083
37.97	113.503	-57.2024	-55.7596
37.97	113.503	-57.4238	-55.9264
37.97	113.503	-61.1452	-59.4284
37.97	113.503	-66.0845	-64.93
37.97	113.503	-71.6877	-70.9819
37.97	113.503	-75.2843	-74.9925
37.97	113.503	-76.282	-76.2862
37.97	113.504	-77.2426	-77.58
37.97	113.504	-73.7727	-73.7186
37.97	113.504	-69.7199	-69.8572
37.97	113.504	-65.9871	-65.9958
37.97	113.504	-67.2471	-67.6231
37.97	113.504	-68.7977	-69.4181
37.97	113.504	-70.4126	-71.213
37.97	113.504	-69.6945	-70.7465
37.97	113.505	-67.7795	-68.8693
37.97	113.505	-65.9391	-66.9921
37.97	113.505	-63.9197	-64.6906
37.97	113.505	-62.8562	-63.3665
37.97	113.505	-62.4156	-62.0424
37.97	113.505	-60.064	-59.743
37.97	113.505	-58.0579	-57.7093
37.97	113.505	-56.038	-55.6756
37.97	113.506	-54.5202	-54.1021
37.97	113.506	-50.7789	-50.9794
37.97	113.506	-52.0254	-52.4254
37.97	113.506	-49.5566	-50.0674
37.97	113.506	-47.285	-47.7094
37.97	113.506	-44.5489	-44.9583
37.97	113.506	-43.8462	-44.4425
37.97	113.507	-43.1092	-43.9267
37.97	113.507	-42.4373	-43.4108
37.97	113.507	-42.4373	-43.4108
37.97	113.507	-39.6036	-40.0942
37.97	113.507	-39.6036	-40.0942
37.97	113.507	-35.0914	-35.1735
37.97	113.507	-30.4713	-30.5612
37.97	113.508	-26.1878	-25.949
37.97	113.508	-27.1435	-26.711
37.97	113.508	-27.5257	-26.8574
37.97	113.508	-27.6785	-26.8557
37.97	113.508	-25.7528	-25.5216
37.97	113.508	-23.9161	-24.5307
37.97	113.508	-22.4736	-23.7467
37.97	113.508	-22.4268	-23.6885
37.97	113.509	-22.0511	-22.8161
37.97	113.509	-20.074	-19.8318
37.9699	113.499	-4.29413	-6.40767
37.9699	113.499	-11.0168	-12.3789
37.9699	113.499	-13.7438	-14.7748
37.9699	113.499	-17.3954	-18.0685
37.9699	113.499	-21.9394	-22.064
37.9699	113.499	-25.2936	-25.4614
37.9699	113.499	-27.9103	-28.1267
37.9699	113.499	-30.4955	-30.3455
37.9699	113.5	-32.8277	-32.5644
37.9699	113.5	-35.2304	-34.9265
37.9699	113.5	-34.7482	-34.5016
37.9699	113.5	-34.0104	-33.8809
37.9699	113.5	-32.6874	-32.5761
37.9699	113.5	-33.6224	-33.5569
37.9699	113.5	-34.8831	-34.8956
37.9699	113.5	-36.4704	-36.6098
37.9699	113.501	-37.2798	-37.4258
37.9699	113.501	-37.9579	-37.8727
37.9699	113.501	-38.6615	-38.3196
37.9699	113.501	-43.2848	-42.8916
37.9699	113.501	-50.3979	-50.1288
37.9699	113.501	-57.4362	-57.366
37.9699	113.501	-57.8576	-57.7816
37.9699	113.501	-55.949	-55.7672
37.9699	113.502	-54.0817	-53.7528
37.9699	113.502	-53.1026	-52.8085
37.9699	113.502	-51.662	-51.3539
37.9699	113.502	-49.7959	-49.6511
37.9699	113.502	-49.4788	-49.9567
37.9699	113.502	-50.2457	-50.7442
37.9699	113.502	-49.9147	-51.4745
37.9699	113.502	-49.1678	-50.7934
37.9699	113.503	-48.4224	-50.1123
37.9699	113.503	-50.0646	-50.9029
37.9699	113.503	-52.7017	-52.3513
37.9699	113.503	-58.0023	-56.678
37.9699	113.503	-64.0317	-62.8424
37.9699	113.503	-69.1043	-68.7247
37.9699	113.503	-71.8912	-72.026
37.9699	113.503	-72.4063	-72.6949
37.9699	113.504	-72.9083	-73.3638
37.9699	113.504	-71.1163	-71.4521
37.9699	113.504	-68.9199	-68.7496
37.9699	113.504	-65.4887	-65.2749
37.9699	113.504	-66.4165	-66.5405
37.9699	113.504	-69.4443	-70.0137
37.9699	113.504	-71.7502	-72.6186
37.9699	113.504	-71.7183	-72.6609
37.9699	113.505	-69.0398	-69.8831
37.9699	113.505	-66.4189	-67.1053
37.9699	113.505	-63.6316	-64.0809
37.9699	113.505	-62.5844	-63.1059
37.9699	113.505	-61.7312	-62.1309
37.9699	113.505	-60.5182	-60.6369
37.9699	113.505	-59.7249	-59.4356
37.9699	113.505	-58.5237	-58.2344
37.9699	113.506	-58.5915	-58.4425
37.9699	113.506	-55.9157	-56.7527
37.9699	113.506	-55.3273	-56.1622
37.9699	113.506	-52.1588	-52.9502
37.9699	113.506	-49.0276	-49.7383
37.9699	113.506	-45.9059	-46.5263
37.9699	113.506	-45.1855	-45.9792
37.9699	113.507	-44.5806	-45.4321
37.9699	113.507	-43.8425	-44.885
37.9699	113.507	-43.8425	-44.885
37.9699	113.507	-40.8528	-41.3691
37.9699	113.507	-40.8528	-41.3691
37.9699	113.507	-36.965	-37.1965
37.9699	113.507	-33.0694	-33.0239
37.9699	113.508	-28.8154	-28.8512
37.9699	113.508	-27.9989	-28.1227
[truncated: 1,934 more rows]
