# Supplementary material for: Mine subsidence monitoring and prediction integrating SBAS-InSAR technology and BO-Prophet model
Source: PeerJ journal article supplement (doi:10.7717/peerj-cs.3327), 2025-10-28
Supplement: Figure125.xlsx [file Figure125.xlsx]

## Sheet: Sheet1
y	x	SBAS-InSAR	Prediction
37.9743	113.5	-22.3087	-16.8626
37.9743	113.5	-20.6082	-14.7418
37.9743	113.5	-30.7834	-18.0647
37.9743	113.5	-26.8886	-21.3774
37.9743	113.501	-28.1098	-22.9806
37.9741	113.5	-30.0829	-24.2482
37.9741	113.5	-33.7399	-28.5163
37.9741	113.5	-29.5348	-24.2024
37.9741	113.5	-25.7198	-19.8886
37.9741	113.5	-30.2394	-17.3915
37.9741	113.5	-24.9925	-21.025
37.9741	113.5	-28.2191	-23.9877
37.9741	113.501	-29.431	-24.6664
37.9741	113.501	-28.4294	-23.7011
37.9741	113.501	-27.7389	-23.5795
37.9741	113.501	-27.472	-23.9355
37.9741	113.501	-28.5256	-24.1291
37.974	113.5	-28.1449	-21.4488
37.974	113.5	-30.8327	-25.1904
37.974	113.5	-33.3848	-28.9319
37.974	113.5	-30.5196	-26.0648
37.974	113.5	-28.0119	-23.1976
37.974	113.5	-25.9357	-21.6529
37.974	113.5	-27.6799	-24.2977
37.974	113.5	-29.8299	-25.9543
37.974	113.501	-30.0789	-25.3205
37.974	113.501	-28.213	-23.4324
37.974	113.501	-26.9239	-22.6009
37.974	113.501	-26.855	-23
37.974	113.501	-27.9308	-23.5936
37.974	113.501	-27.6304	-22.8896
37.974	113.501	-24.722	-19.9304
37.974	113.501	-22.1595	-16.7086
37.974	113.502	-19.3215	-13.2402
37.9739	113.499	-26.1626	-17.9929
37.9739	113.5	-27.3194	-20.6173
37.9739	113.5	-28.5983	-23.2418
37.9739	113.5	-30.3645	-25.8662
37.9739	113.5	-29.5033	-25.7073
37.9739	113.5	-29.324	-25.5484
37.9739	113.5	-29.0783	-25.6324
37.9739	113.5	-29.0127	-26.1183
37.9739	113.5	-29.4319	-25.5225
37.9739	113.501	-28.6323	-23.8007
37.9739	113.501	-26.746	-21.6192
37.9739	113.501	-27.5044	-20.298
37.9739	113.501	-25.3869	-20.3508
37.9739	113.501	-27.166	-21.1113
37.9739	113.501	-26.8734	-21.4041
37.9739	113.501	-24.5813	-18.9135
37.9739	113.501	-22.2066	-15.9318
37.9739	113.502	-19.6239	-12.6438
37.9739	113.502	-18.231	-11.674
37.9739	113.502	-16.8722	-10.7041
37.9739	113.502	-16.5297	-10.8846
37.9738	113.499	-19.2105	-12.5873
37.9738	113.499	-26.6328	-15.5713
37.9738	113.5	-23.0143	-16.5323
37.9738	113.5	-23.238	-17.4932
37.9738	113.5	-24.1498	-18.7605
37.9738	113.5	-26.1094	-21.5802
37.9738	113.5	-27.9132	-23.9238
37.9738	113.5	-28.9358	-25.7082
37.9738	113.5	-27.3862	-24.1457
37.9738	113.5	-26.9779	-22.7884
37.9738	113.501	-26.2661	-21.1374
37.9738	113.501	-25.7633	-19.9949
37.9738	113.501	-26.3518	-18.8789
37.9738	113.501	-24.6966	-18.7015
37.9738	113.501	-25.7279	-19.2409
37.9738	113.501	-25.8675	-19.6427
37.9738	113.501	-23.9104	-17.2324
37.9738	113.501	-21.7323	-14.3112
37.9738	113.502	-19.6819	-11.44
37.9738	113.502	-18.6626	-11.0234
37.9738	113.502	-17.4314	-10.6023
37.9738	113.502	-16.6464	-10.5818
37.9738	113.502	-15.7	-9.43024
37.9738	113.502	-11.5181	-4.04159
37.9736	113.499	-14.2809	-4.68179
37.9736	113.499	-14.2366	-7.74779
37.9736	113.499	-16.9497	-10.8138
37.9736	113.5	-22.4123	-11.0483
37.9736	113.5	-17.4193	-10.7127
37.9736	113.5	-18.3958	-11.6506
37.9736	113.5	-22.1314	-16.258
37.9736	113.5	-25.3771	-20.217
37.9736	113.5	-26.7202	-22.1961
37.9736	113.5	-25.017	-20.1221
37.9736	113.5	-28.0912	-19.2488
37.9736	113.501	-27.5622	-18.991
37.9736	113.501	-27.9395	-19.8811
37.9736	113.501	-26.5787	-20.3218
37.9736	113.501	-27.3358	-20.564
37.9736	113.501	-26.6057	-19.8886
37.9736	113.501	-26.0939	-19.3104
37.9736	113.501	-24.3193	-17.0648
37.9736	113.501	-21.9225	-13.7283
37.9736	113.502	-19.5498	-10.3919
37.9736	113.502	-18.9978	-10.1498
37.9736	113.502	-17.6599	-9.80495
37.9736	113.502	-16.2901	-9.46007
37.9736	113.502	-15.1187	-8.52462
37.9736	113.502	-14.1513	-7.31275
37.9736	113.502	-11.3487	-3.83481
37.9736	113.503	-12.4757	-4.8382
37.9736	113.503	-14.6665	-7.008
37.9735	113.499	-9.75974	-0.804116
37.9735	113.499	-13.0972	-3.61583
37.9735	113.499	-16.4458	-6.42755
37.9735	113.5	-16.9884	-6.63534
37.9735	113.5	-16.1432	-5.35731
37.9735	113.5	-17.1686	-6.09656
37.9735	113.5	-21.6784	-10.7457
37.9735	113.5	-25.2789	-14.7126
37.9735	113.5	-26.4777	-16.2203
37.9735	113.5	-25.4583	-15.5499
37.9735	113.5	-27.3201	-18.2198
37.9735	113.501	-29.7655	-21.3314
37.9735	113.501	-31.772	-24.4477
37.9735	113.501	-30.8168	-25.2814
37.9735	113.501	-29.8331	-24.8909
37.9735	113.501	-29.1317	-22.4425
37.9735	113.501	-27.2664	-19.9941
37.9735	113.501	-25.4077	-17.6878
37.9735	113.502	-19.5818	-9.80859
37.9735	113.502	-19.4489	-9.64183
37.9735	113.502	-18.3056	-9.26787
37.9735	113.502	-16.554	-8.5473
37.9735	113.502	-15.2903	-7.90044
37.9735	113.502	-16.0537	-8.43843
37.9735	113.502	-17.2664	-8.7067
37.9735	113.503	-17.2619	-8.65477
37.9735	113.503	-19.5301	-10.6122
37.9735	113.503	-18.6714	-10.3087
37.9735	113.503	-17.881	-10.0052
37.9735	113.503	-16.5913	-8.99744
37.9734	113.499	-7.20813	0.783352
37.9734	113.499	-7.95207	0.234712
37.9734	113.499	-10.1884	-1.76056
37.9734	113.499	-12.3791	-3.75584
37.9734	113.5	-12.9153	-4.13982
37.9734	113.5	-11.496	-2.37843
37.9734	113.5	-12.2308	-2.84818
37.9734	113.5	-16.1139	-6.59332
37.9734	113.5	-19.93	-10.4276
37.9734	113.5	-21.0907	-11.4028
37.9734	113.5	-22.4046	-12.8517
37.9734	113.5	-27.133	-18.508
37.9734	113.501	-32.4227	-24.7923
37.9734	113.501	-35.5879	-28.8454
37.9734	113.501	-35.2182	-29.319
37.9734	113.501	-33.7587	-28.2298
37.9734	113.501	-31.9028	-24.9186
37.9734	113.501	-29.4371	-21.6073
37.9734	113.501	-28.8101	-20.2544
37.9734	113.502	-22.1507	-11.8176
37.9734	113.502	-20.3245	-9.80612
37.9734	113.502	-19.854	-9.68654
37.9734	113.502	-18.1118	-8.83342
37.9734	113.502	-17.1599	-8.74824
37.9734	113.502	-18.2352	-9.82993
37.9734	113.502	-19.8501	-10.9636
37.9734	113.502	-22.6283	-13.0432
37.9734	113.503	-24.0694	-14.2137
37.9734	113.503	-24.228	-16.2959
37.9734	113.503	-23.5924	-15.5499
37.9734	113.503	-22.6495	-13.8039
37.9734	113.503	-20.3456	-11.9036
37.9734	113.503	-19.4148	-10.9208
37.9734	113.503	-18.7442	-10.1867
37.9734	113.503	-16.4023	-8.25411
37.9734	113.504	-12.7079	-4.78588
37.9733	113.499	-7.70271	-0.139072
37.9733	113.499	-8.42308	-0.521398
37.9733	113.499	-9.153	-1.47438
37.9733	113.499	-9.87715	-2.42737
37.9733	113.5	-10.3165	-2.89487
37.9733	113.5	-9.71225	-1.91022
37.9733	113.5	-10.8074	-2.73389
37.9733	113.5	-13.9985	-5.85135
37.9733	113.5	-17.5008	-9.3127
37.9733	113.5	-19.228	-10.8105
37.9733	113.5	-22.3352	-14.0505
37.9733	113.5	-29.2113	-21.871
37.9733	113.501	-36.1499	-29.8468
37.9733	113.501	-38.74	-32.5545
37.9733	113.501	-37.3935	-30.8371
37.9733	113.501	-35.1725	-27.9649
37.9733	113.501	-33.2518	-25.3066
37.9733	113.501	-31.3332	-22.6483
37.9733	113.501	-30.8677	-21.5156
37.9733	113.501	-29.1842	-19.6239
37.9733	113.502	-22.3602	-11.5249
37.9733	113.502	-22.984	-12.2169
37.9733	113.502	-23.937	-13.7738
37.9733	113.502	-23.1447	-13.8176
37.9733	113.502	-24.1427	-14.3382
37.9733	113.502	-27.1356	-16.7635
37.9733	113.503	-30.3086	-19.4323
37.9733	113.503	-30.2603	-21.1803
37.9733	113.503	-30.4941	-21.227
37.9733	113.503	-27.7589	-18.2733
37.9733	113.503	-24.5491	-15.2382
37.9733	113.503	-21.4575	-12.4659
37.9733	113.503	-19.815	-11.0001
37.9733	113.503	-17.7274	-9.24118
37.9733	113.504	-14.1947	-5.50932
37.9733	113.504	-11.0008	-1.97611
37.9733	113.504	-8.14412	1.50107
37.9733	113.504	-7.63103	2.02129
37.9733	113.504	-7.57712	2.08332
37.9731	113.499	-7.68786	-0.960249
37.9731	113.499	-8.54801	-1.32209
37.9731	113.499	-9.43051	-1.68393
37.9731	113.499	-8.97976	-1.73614
37.9731	113.499	-8.53291	-1.78835
37.9731	113.5	-8.42339	-1.94463
37.9731	113.5	-9.07005	-2.20264
37.9731	113.5	-11.2377	-4.09405
37.9731	113.5	-14.5773	-7.51479
37.9731	113.5	-17.9318	-11.083
37.9731	113.5	-20.1355	-13.3191
37.9731	113.5	-24.3376	-17.6442
37.9731	113.5	-31.5093	-25.3901
37.9731	113.501	-38.3363	-32.8347
37.9731	113.501	-39.6045	-33.2381
37.9731	113.501	-37.4485	-29.9193
37.9731	113.501	-35.0977	-26.2502
37.9731	113.501	-33.8957	-24.7612
37.9731	113.501	-32.8752	-23.4576
37.9731	113.501	-32.4161	-22.6691
37.9731	113.501	-33.0863	-23.3696
37.9731	113.502	-27.8608	-17.1767
37.9731	113.502	-27.3952	-16.5084
37.9731	113.502	-30.8065	-20.14
37.9731	113.502	-29.1376	-18.8296
37.9731	113.502	-28.3774	-18.2507
37.9731	113.502	-27.2871	-17.001
37.9731	113.502	-29.7133	-19.101
37.9731	113.503	-32.0847	-21.6661
37.9731	113.503	-33.3526	-23.3079
37.9731	113.503	-34.473	-24.3827
37.9731	113.503	-31.5475	-21.4264
37.9731	113.503	-28.5122	-18.2553
37.9731	113.503	-24.8311	-14.8476
37.9731	113.503	-22.2932	-12.7972
37.9731	113.503	-20.0636	-10.9396
37.9731	113.504	-16.2203	-7.02088
37.9731	113.504	-13.1297	-3.36142
37.9731	113.504	-9.93194	0.342331
37.9731	113.504	-9.08169	0.966702
37.9731	113.504	-9.16012	0.559356
37.9731	113.504	-10.1121	-0.62445
37.9731	113.504	-13.4863	-4.03187
37.9731	113.504	-16.8057	-7.4393
37.9731	113.505	-18.2617	-8.97874
37.973	113.499	-6.18139	0.192777
37.973	113.499	-7.23964	-0.364943
37.973	113.499	-8.29419	-0.922664
37.973	113.499	-7.78194	-0.976735
37.973	113.499	-6.77876	-0.495539
37.973	113.5	-7.09594	-1.08392
37.973	113.5	-9.54746	-3.04662
37.973	113.5	-13.3904	-6.69722
37.973	113.5	-17.3623	-10.9661
37.973	113.5	-20.8871	-14.9962
37.973	113.5	-23.661	-17.9928
37.973	113.5	-28.068	-22.5695
37.973	113.5	-34.8226	-29.7601
37.973	113.501	-40.9943	-36.2963
37.973	113.501	-41.5341	-35.2381
37.973	113.501	-39.0579	-30.9118
37.973	113.501	-36.6972	-26.5855
37.973	113.501	-35.59	-25.5961
37.973	113.501	-34.6201	-24.7378
37.973	113.501	-33.6279	-23.8795
37.973	113.501	-34.3048	-24.714
37.973	113.502	-32.4324	-22.6472
37.973	113.502	-32.0082	-21.3988
37.973	113.502	-34.3926	-23.914
37.973	113.502	-33.3596	-22.9514
37.973	113.502	-30.5908	-19.9981
37.973	113.502	-31.5105	-20.7644
37.973	113.503	-33.2505	-22.3747
37.973	113.503	-34.8285	-23.4779
37.973	113.503	-34.827	-24.5811
37.973	113.503	-32.5951	-22.4303
37.973	113.503	-31.421	-19.7972
37.973	113.503	-27.9047	-16.7584
37.973	113.503	-24.8885	-14.4781
37.973	113.503	-22.4474	-12.6138
37.973	113.504	-19.0318	-9.40017
37.973	113.504	-16.2134	-6.19347
37.973	113.504	-13.372	-2.92355
37.973	113.504	-12.4007	-2.20423
37.973	113.504	-12.7324	-2.93653
37.973	113.504	-13.5343	-4.05745
37.973	113.504	-16.2037	-6.73868
37.973	113.504	-18.8629	-9.41992
37.973	113.505	-21.2186	-11.7757
37.973	113.505	-18.012	-8.36153
37.973	113.505	-13.9544	-4.76854
37.973	113.505	-9.95789	-1.17555
37.973	113.505	-11.0059	-3.2133
37.9729	113.499	-3.00166	3.39567
37.9729	113.499	-4.76377	1.80438
37.9729	113.499	-6.4578	0.213095
37.9729	113.499	-6.85591	-0.712583
37.9729	113.499	-5.9878	-0.207519
37.9729	113.5	-6.67078	-1.10508
37.9729	113.5	-10.041	-3.99884
37.9729	113.5	-14.8969	-8.73878
37.9729	113.5	-19.6448	-13.8
37.9729	113.5	-23.5278	-18.1673
37.9729	113.5	-26.9191	-21.7304
37.9729	113.5	-31.4993	-26.5133
37.9729	113.5	-37.7702	-33.3205
37.9729	113.501	-43.2756	-39.208
37.9729	113.501	-43.5304	-37.5162
37.9729	113.501	-41.0044	-32.8578
37.9729	113.501	-38.5941	-28.1993
37.9729	113.501	-37.5567	-27.5437
37.9729	113.501	-35.4815	-26.0845
37.9729	113.501	-36.1323	-26.69
37.9729	113.502	-38.001	-28.5434
37.9729	113.502	-37.487	-27.1597
37.9729	113.502	-35.9024	-25.3872
37.9729	113.502	-35.9518	-25.2537
37.9729	113.502	-35.2925	-24.5309
37.9729	113.502	-32.727	-21.9424
37.9729	113.503	-33.4335	-22.6242
37.9729	113.503	-34.9192	-23.4549
37.9729	113.503	-33.9406	-23.595
37.9729	113.503	-32.7726	-22.3053
37.9729	113.503	-33.8623	-21.0924
37.9729	113.503	-32.7229	-20.3353
37.9729	113.503	-30.8483	-19.2644
37.9729	113.503	-27.5339	-16.7436
37.9729	113.504	-22.9548	-12.8012
37.9729	113.504	-19.2421	-8.99679
37.9729	113.504	-16.983	-6.47735
37.9729	113.504	-16.419	-6.30604
37.9729	113.504	-17.0577	-7.39445
37.9729	113.504	-17.7898	-8.48286
37.9729	113.504	-19.3452	-9.98904
37.9729	113.504	-20.9864	-11.4952
37.9729	113.505	-22.5802	-13.0014
37.9729	113.505	-19.9991	-10.8455
37.9729	113.505	-12.4282	-5.32389
37.9729	113.505	-12.5219	-5.84947
37.9729	113.505	-10.8692	-3.88109
37.9729	113.505	-9.21115	-1.91272
37.9729	113.505	-7.4466	0.265895
37.9729	113.506	-7.28303	0.899052
37.9728	113.499	-1.08488	4.89821
37.9728	113.499	-0.813837	5.30026
37.9728	113.499	-3.23622	2.74148
37.9728	113.499	-5.58807	0.182705
37.9728	113.499	-7.03675	-1.74132
37.9728	113.499	-6.38454	-1.35457
37.9728	113.5	-7.531	-2.52293
37.9728	113.5	-10.9432	-5.46172
37.9728	113.5	-16.2868	-10.3698
37.9728	113.5	-21.1464	-15.2132
37.9728	113.5	-25.4669	-19.706
37.9728	113.5	-29.3717	-23.549
37.9728	113.5	-33.969	-28.3696
37.9728	113.5	-39.1365	-34.2196
37.9728	113.501	-43.2455	-38.8932
37.9728	113.501	-42.9404	-37.1194
37.9728	113.501	-40.6875	-33.0428
37.9728	113.501	-38.6692	-28.9661
37.9728	113.501	-38.4618	-28.8175
37.9728	113.501	-37.2832	-27.9807
37.9728	113.501	-37.9296	-28.8485
37.9728	113.501	-39.089	-29.6618
37.9728	113.502	-41.9717	-32.334
37.9728	113.502	-43.0073	-32.9615
37.9728	113.502	-37.7741	-26.8554
37.9728	113.502	-35.9587	-24.9457
37.9728	113.502	-35.8665	-24.6619
37.9728	113.502	-34.7371	-23.6762
37.9728	113.503	-35.266	-24.2374
37.9728	113.503	-36.7424	-25.1966
37.9728	113.503	-35.349	-24.3813
37.9728	113.503	-34.2745	-23.1669
37.9728	113.503	-36.8234	-23.0344
37.9728	113.503	-38.0554	-24.7355
37.9728	113.503	-37.2222	-24.7871
37.9728	113.503	-32.686	-21.1805
37.9728	113.504	-26.5219	-15.738
37.9728	113.504	-22.275	-11.6011
37.9728	113.504	-20.5837	-9.81768
37.9728	113.504	-20.4353	-10.1306
37.9728	113.504	-20.9469	-11.275
37.9728	113.504	-21.7221	-12.5762
37.9728	113.504	-22.3717	-13.131
37.9728	113.504	-22.9828	-13.5972
37.9728	113.505	-23.6245	-14.0634
37.9728	113.505	-21.7463	-13.2068
37.9728	113.505	-18.2944	-11.103
37.9728	113.505	-14.8857	-8.99921
37.9728	113.505	-14.0134	-7.87561
37.9728	113.505	-12.4185	-5.71294
37.9728	113.505	-10.9109	-3.55028
37.9728	113.505	-9.81917	-1.98787
37.9728	113.506	-9.54119	-1.60526
37.9728	113.506	-9.26722	-1.22264
37.9728	113.506	-9.4494	-1.05054
37.9728	113.506	-11.0375	-2.08319
37.9726	113.499	-0.887384	4.57129
37.9726	113.499	-2.09549	3.06961
37.9726	113.499	-4.27873	0.627854
37.9726	113.499	-6.41815	-1.8139
37.9726	113.499	-8.00419	-3.72013
37.9726	113.499	-7.82301	-3.60396
37.9726	113.5	-8.95014	-4.64266
37.9726	113.5	-12.3218	-7.59995
37.9726	113.5	-17.4277	-12.0503
37.9726	113.5	-22.4507	-16.3876
37.9726	113.5	-26.8985	-20.3187
37.9726	113.5	-31.3495	-24.3848
37.9726	113.5	-35.7989	-28.8958
37.9726	113.5	-39.1975	-33.0427
37.9726	113.501	-41.1004	-35.6775
37.9726	113.501	-40.1803	-34.299
37.9726	113.501	-38.8578	-31.6011
37.9726	113.501	-37.6243	-28.8555
37.9726	113.501	-37.8077	-28.6135
37.9726	113.501	-37.3154	-28.137
37.9726	113.501	-42.1103	-32.5638
37.9726	113.502	-45.4991	-35.4669
37.9726	113.502	-47.4283	-36.8713
37.9726	113.502	-45.3716	-34.4106
37.9726	113.502	-40.1135	-28.7596
37.9726	113.502	-35.8281	-24.4895
37.9726	113.502	-35.7153	-24.1134
37.9726	113.502	-35.0685	-23.5935
37.9726	113.503	-38.3781	-26.6669
37.9726	113.503	-39.5715	-27.5404
37.9726	113.503	-39.4141	-26.4203
37.9726	113.503	-39.0795	-25.1243
37.9726	113.503	-40.2051	-25.5947
37.9726	113.503	-42.3189	-28.5862
37.9726	113.503	-42.1231	-30.2782
37.9726	113.503	-37.9917	-26.446
37.9726	113.504	-31.1661	-19.9539
37.9726	113.504	-25.6402	-14.4692
37.9726	113.504	-23.7286	-12.4186
37.9726	113.504	-23.4869	-12.6998
37.9726	113.504	-23.6849	-13.7378
37.9726	113.504	-24.3191	-15.0774
37.9726	113.504	-24.3479	-15.2702
37.9726	113.504	-24.3611	-15.1739
37.9726	113.505	-24.3826	-15.0776
37.9726	113.505	-21.9722	-13.7648
37.9726	113.505	-19.3929	-12.2094
37.9726	113.505	-16.8402	-10.654
37.9726	113.505	-15.6757	-9.33102
37.9726	113.505	-14.167	-7.39194
37.9726	113.505	-12.6882	-5.45286
37.9726	113.505	-12.2324	-4.66165
37.9726	113.506	-12.1287	-4.53508
37.9726	113.506	-12.0036	-4.40852
37.9726	113.506	-12.1936	-4.33968
37.9726	113.506	-13.3395	-4.97814
37.9726	113.506	-14.3761	-5.16743
37.9726	113.506	-17.4149	-6.71409
37.9725	113.499	-2.33438	2.6743
37.9725	113.499	-4.06199	0.303286
37.9725	113.499	-5.41214	-1.48125
37.9725	113.499	-6.79272	-3.26579
37.9725	113.499	-8.44355	-5.13259
37.9725	113.499	-8.8989	-5.29712
37.9725	113.5	-10.7326	-6.73898
37.9725	113.5	-14.1066	-9.77022
37.9725	113.5	-19.1152	-13.8615
37.9725	113.5	-23.7834	-17.3096
37.9725	113.5	-28.3885	-20.7701
37.9725	113.5	-32.8817	-24.7723
37.9725	113.5	-36.7931	-28.7106
37.9725	113.5	-38.4175	-30.9293
37.9725	113.501	-38.3282	-31.4638
37.9725	113.501	-37.1214	-30.5954
37.9725	113.501	-36.9297	-29.8001
37.9725	113.501	-36.7981	-28.6023
37.9725	113.501	-37.4923	-28.3411
37.9725	113.501	-37.4738	-28.1265
37.9725	113.501	-39.5817	-30.2792
37.9725	113.501	-44.0873	-34.2449
37.9725	113.502	-48.2616	-37.6234
37.9725	113.502	-49.2013	-38.6545
37.9725	113.502	-48.4063	-37.7267
37.9725	113.502	-38.4105	-26.631
37.9725	113.502	-36.3446	-24.575
37.9725	113.502	-37.546	-25.8644
37.9725	113.503	-41.6481	-29.0865
37.9725	113.503	-41.5022	-28.7216
37.9725	113.503	-41.5638	-27.9393
37.9725	113.503	-41.6901	-27.1571
37.9725	113.503	-42.8922	-27.5823
37.9725	113.503	-43.9747	-30.1137
37.9725	113.503	-43.5434	-31.3601
37.9725	113.503	-39.2947	-28.333
37.9725	113.504	-34.0318	-22.6594
37.9725	113.504	-29.724	-17.897
37.9725	113.504	-27.6227	-15.7269
37.9725	113.504	-26.529	-15.2438
37.9725	113.504	-25.5692	-15.2293
37.9725	113.504	-25.2705	-15.6886
37.9725	113.504	-25.0801	-15.9248
37.9725	113.504	-25.1161	-16.0662
37.9725	113.505	-25.1896	-16.2076
37.9725	113.505	-23.181	-14.8531
37.9725	113.505	-21.19	-13.4986
37.9725	113.505	-19.2268	-12.1441
37.9725	113.505	-17.8631	-10.8625
37.9725	113.505	-16.2979	-9.24468
37.9725	113.505	-14.808	-7.7588
37.9725	113.505	-14.7918	-7.59729
37.9725	113.506	-14.9478	-7.70735
37.9725	113.506	-15.3774	-8.10233
37.9725	113.506	-15.9849	-8.52533
37.9725	113.506	-17.1604	-9.45417
37.9725	113.506	-17.1534	-8.38012
37.9725	113.506	-17.832	-7.23275
37.9725	113.506	-18.1452	-5.64423
37.9725	113.506	-20.4003	-6.98737
37.9724	113.499	-0.572512	4.83415
37.9724	113.499	-2.58763	2.36038
37.9724	113.499	-4.58773	-0.113378
37.9724	113.499	-5.66897	-2.01196
37.9724	113.499	-6.79429	-3.91054
37.9724	113.499	-8.7337	-6.24341
37.9724	113.499	-10.2626	-7.11201
37.9724	113.5	-13.0126	-9.37825
37.9724	113.5	-16.5836	-13.0021
37.9724	113.5	-20.8838	-16.7256
37.9724	113.5	-25.4399	-19.4749
37.9724	113.5	-29.8527	-22.0452
37.9724	113.5	-34.4083	-25.6944
37.9724	113.5	-37.5131	-28.9201
37.9724	113.5	-38.0298	-29.731
37.9724	113.501	-36.9916	-28.929
37.9724	113.501	-35.9249	-28.127
37.9724	113.501	-36.1327	-28.2036
37.9724	113.501	-38.0453	-28.7997
37.9724	113.501	-38.1992	-28.7747
37.9724	113.501	-39.1519	-29.761
37.9724	113.502	-49.4141	-38.8646
37.9724	113.502	-50.3451	-39.7614
37.9724	113.502	-51.1567	-40.5141
37.9724	113.502	-47.2466	-35.7837
37.9724	113.502	-42.2893	-30.2855
37.9724	113.502	-38.1423	-26.4469
37.9724	113.502	-39.8322	-28.3785
37.9724	113.502	-41.0944	-28.874
37.9724	113.503	-42.2654	-29.3418
37.9724	113.503	-42.2506	-28.6846
37.9724	113.503	-42.6205	-28.4983
37.9724	113.503	-42.6883	-27.9735
37.9724	113.503	-43.1058	-27.8659
37.9724	113.503	-41.3831	-28.7472
37.9724	113.503	-42.0358	-30.349
37.9724	113.503	-40.2935	-29.5815
37.9724	113.504	-38.2884	-26.639
37.9724	113.504	-35.1741	-22.8225
37.9724	113.504	-31.375	-20.4414
37.9724	113.504	-30.1058	-18.8254
37.9724	113.504	-27.6164	-17.1434
37.9724	113.504	-26.0006	-15.9781
37.9724	113.504	-25.6609	-16.4885
37.9724	113.504	-26.1102	-17.5816
37.9724	113.505	-26.5707	-18.6747
37.9724	113.505	-24.9673	-17.2
37.9724	113.505	-23.4123	-15.7252
37.9724	113.505	-21.9459	-14.2504
37.9724	113.505	-20.1767	-12.7194
37.9724	113.505	-18.4144	-11.1883
37.9724	113.505	-16.8283	-9.87392
37.9724	113.505	-17.2199	-10.1957
37.9724	113.506	-17.5269	-10.5174
37.9724	113.506	-18.8691	-11.873
37.9724	113.506	-20.2401	-13.1767
37.9724	113.506	-21.7034	-14.4804
37.9724	113.506	-19.6949	-10.6738
37.9724	113.506	-18.1085	-6.7424
37.9724	113.506	-16.4331	-2.81105
37.9724	113.506	-18.2835	-3.97962
37.9722	113.499	-0.0881496	5.28561
37.9722	113.499	-1.62554	3.87866
37.9722	113.499	-3.13515	2.47171
37.9722	113.499	-4.64811	-0.486344
37.9722	113.499	-6.20024	-3.4444
37.9722	113.499	-9.24392	-7.39541
37.9722	113.499	-12.1136	-9.38134
37.9722	113.5	-16.0236	-12.9024
37.9722	113.5	-19.5945	-16.9655
37.9722	113.5	-23.565	-20.4309
37.9722	113.5	-27.812	-22.6526
37.9722	113.5	-32.3453	-24.7686
37.9722	113.5	-36.2965	-27.9187
37.9722	113.5	-38.8064	-30.7775
37.9722	113.5	-38.7065	-30.5792
37.9722	113.501	-37.9239	-29.4113
37.9722	113.501	-37.1497	-28.2434
37.9722	113.501	-38.8663	-29.6309
37.9722	113.501	-40.4782	-31.1102
37.9722	113.501	-39.6031	-30.4289
37.9722	113.501	-39.6031	-30.4289
37.9722	113.502	-50.3258	-39.3263
37.9722	113.502	-50.6168	-39.4762
37.9722	113.502	-48.7685	-37.2528
37.9722	113.502	-40.9941	-29.1829
37.9722	113.502	-42.3219	-30.5511
37.9722	113.502	-42.5647	-30.2593
37.9722	113.503	-42.7327	-29.6579
37.9722	113.503	-42.4393	-28.5736
37.9722	113.503	-42.8509	-28.6171
37.9722	113.503	-42.0538	-27.6267
37.9722	113.503	-41.2663	-26.6362
37.9722	113.503	-39.9839	-26.5448
37.9722	113.503	-40.177	-28.4978
37.9722	113.503	-39.6485	-29.3398
37.9722	113.504	-39.8504	-28.4611
37.9722	113.504	-38.8241	-26.2987
37.9722	113.504	-36.82	-24.9183
37.9722	113.504	-32.1828	-22.7803
37.9722	113.504	-29.4856	-19.4913
37.9722	113.504	-26.4598	-16.5311
37.9722	113.504	-26.0576	-17.4884
37.9722	113.504	-27.2473	-19.9258
37.9722	113.505	-28.4959	-22.3632
37.9722	113.505	-26.9939	-20.5607
37.9722	113.505	-25.6038	-18.7583
37.9722	113.505	-24.394	-16.9558
37.9722	113.505	-22.3241	-14.9756
37.9722	113.505	-20.2008	-12.9953
37.9722	113.505	-18.3678	-11.27
37.9722	113.505	-18.8142	-11.604
37.9722	113.506	-19.2445	-11.9381
37.9722	113.506	-21.9669	-14.747
37.9722	113.506	-24.543	-17.4945
37.9722	113.506	-27.2263	-20.2419
37.9722	113.506	-24.2339	-15.7648
37.9722	113.506	-20.6595	-9.03653
37.9722	113.506	-16.8056	-2.30824
37.9722	113.506	-18.0961	-2.83207
37.9722	113.507	-18.5286	-3.14082
37.9722	113.507	-25.2193	-10.4929
37.9722	113.507	-24.8828	-10.2719
37.9721	113.499	0.121813	5.47419
37.9721	113.499	-0.758904	5.32391
37.9721	113.499	-1.63468	5.17362
37.9721	113.499	-3.51338	1.51645
37.9721	113.499	-5.38155	-2.14072
37.9721	113.499	-9.35004	-7.46604
37.9721	113.499	-13.403	-10.8023
37.9721	113.5	-18.7434	-15.7822
37.9721	113.5	-23.3123	-20.7374
37.9721	113.5	-27.1319	-24.1418
37.9721	113.5	-31.0007	-26.156
37.9721	113.5	-34.8185	-27.9035
37.9721	113.5	-38.5656	-30.9106
37.9721	113.5	-40.8246	-33.6641
37.9721	113.5	-40.4383	-33.0113
37.9721	113.501	-40.0779	-31.5184
37.9721	113.501	-39.7997	-30.0256
37.9721	113.501	-42.1445	-32.0944
37.9721	113.501	-42.175	-32.5139
37.9721	113.501	-42.4414	-33.0543
37.9721	113.501	-41.3898	-32.3936
37.9721	113.501	-42.0985	-32.8566
37.9721	113.502	-48.6872	-36.4928
37.9721	113.502	-48.6872	-36.4928
37.9721	113.502	-48.6872	-36.4928
37.9721	113.502	-44.3644	-31.6767
37.9721	113.502	-44.3644	-31.6767
37.9721	113.502	-44.1409	-31.2572
37.9721	113.503	-42.4477	-28.525
37.9721	113.503	-42.5602	-28.5222
37.9721	113.503	-41.1731	-27.159
37.9721	113.503	-39.7405	-25.7958
37.9721	113.503	-38.8906	-25.4948
37.9721	113.503	-39.6506	-27.7489
37.9721	113.503	-39.0567	-29.3844
37.9721	113.504	-39.4037	-29.264
37.9721	113.504	-40.0692	-28.1137
37.9721	113.504	-38.9326	-27.7109
37.9721	113.504	-35.7112	-25.8783
37.9721	113.504	-30.9904	-21.8264
37.9721	113.504	-26.8026	-17.6457
37.9721	113.504	-26.6165	-18.8664
37.9721	113.504	-28.6158	-22.1775
37.9721	113.505	-30.9008	-25.7054
37.9721	113.505	-29.6546	-24.2858
37.9721	113.505	-28.5409	-22.8661
37.9721	113.505	-27.306	-20.9308
37.9721	113.505	-26.1278	-19.487
37.9721	113.505	-24.9197	-18.0432
37.9721	113.505	-22.5782	-15.2316
37.9721	113.505	-21.3856	-13.6688
37.9721	113.506	-20.1922	-12.1059
37.9721	113.506	-24.5227	-16.6473
37.9721	113.506	-28.6258	-21.0849
37.9721	113.506	-32.774	-25.5224
37.9721	113.506	-30.1319	-21.9134
37.9721	113.506	-18.9971	-3.88262
37.9721	113.506	-20.2045	-4.98084
37.9721	113.507	-21.3507	-6.81375
37.9721	113.507	-25.214	-10.4444
37.9721	113.507	-25.1045	-10.363
37.9721	113.507	-24.9808	-10.289
37.972	113.499	0.166308	5.04094
37.972	113.499	-0.424491	5.42693
37.972	113.499	-1.02783	5.81291
37.972	113.499	-2.87365	2.4883
37.972	113.499	-4.61464	-0.836308
37.972	113.499	-8.84653	-6.41412
37.972	113.499	-13.6632	-10.9205
37.972	113.5	-20.5292	-17.2273
37.972	113.5	-26.9817	-23.0813
37.972	113.5	-31.9111	-26.9131
37.972	113.5	-35.3925	-29.1614
37.972	113.5	-37.9865	-30.7992
37.972	113.5	-40.9029	-33.497
37.972	113.5	-42.8921	-35.9779
37.972	113.5	-43.2196	-35.8704
37.972	113.501	-44.6094	-34.5737
37.972	113.501	-46.3961	-35.9998
37.972	113.501	-45.3849	-35.4356
37.972	113.501	-44.4627	-34.866
37.972	113.501	-43.0365	-33.7793
37.972	113.501	-43.9552	-34.2632
37.972	113.501	-44.2361	-34.4084
37.972	113.502	-45.4854	-33.5696
37.972	113.502	-45.5181	-33.6703
37.972	113.502	-45.6934	-34.0731
37.972	113.502	-45.5868	-32.4116
37.972	113.502	-45.4636	-31.9299
37.972	113.502	-45.1718	-31.9272
37.972	113.503	-42.8367	-29.1249
37.972	113.503	-42.713	-28.6537
37.972	113.503	-41.7242	-27.7337
37.972	113.503	-40.6401	-26.8136
37.972	113.503	-39.8113	-26.5058
37.972	113.503	-38.9564	-27.7303
37.972	113.503	-37.766	-28.5497
37.972	113.504	-38.0908	-28.37
37.972	113.504	-39.0804	-28.2803
37.972	113.504	-39.3528	-29.2978
37.972	113.504	-37.48	-28.5474
37.972	113.504	-33.2154	-24.9398
37.972	113.504	-28.8335	-20.6299
37.972	113.504	-28.612	-21.2598
37.972	113.504	-30.5896	-24.0446
37.972	113.505	-32.9263	-27.3963
37.972	113.505	-32.4444	-27.2774
37.972	113.505	-32.1108	-27.1584
37.972	113.505	-31.0762	-25.5763
37.972	113.505	-30.222	-24.1196
37.972	113.505	-29.3473	-22.6628
37.972	113.505	-26.2665	-18.7164
37.972	113.505	-23.6518	-15.3494
37.972	113.506	-21.1133	-11.9824
37.972	113.506	-26.3269	-17.575
37.972	113.506	-31.2444	-22.9188
37.972	113.506	-36.2348	-28.2626
37.972	113.506	-35.884	-27.7688
37.972	113.506	-24.1727	-10.4012
37.972	113.506	-22.2399	-7.96154
37.972	113.507	-23.5973	-10.352
37.972	113.507	-23.9726	-11.0692
37.972	113.507	-25.9769	-10.8964
37.972	113.507	-25.8815	-11.0679
37.972	113.507	-25.6646	-11.6011
37.9719	113.499	0.310688	4.24872
37.9719	113.499	-0.527896	4.26074
37.9719	113.499	-1.35989	4.27276
37.9719	113.499	-2.84195	1.88622
37.9719	113.499	-5.03711	-1.13643
37.9719	113.499	-9.12127	-6.08305
37.9719	113.499	-14.7761	-11.43
37.9719	113.5	-22.0012	-17.7735
37.9719	113.5	-29.6912	-23.8184
37.9719	113.5	-35.1498	-27.8355
37.9719	113.5	-38.4507	-30.6913
37.9719	113.5	-40.0777	-32.6528
37.9719	113.5	-43.0517	-34.9034
37.9719	113.5	-44.5285	-36.6827
37.9719	113.5	-45.6544	-37.405
37.9719	113.501	-47.4451	-38.3918
37.9719	113.501	-49.5346	-39.3786
37.9719	113.501	-50.7186	-40.3994
37.9719	113.501	-50.023	-40.2192
37.9719	113.501	-45.9622	-36.3774
37.9719	113.501	-45.6567	-35.6128
37.9719	113.501	-46.9168	-37.0076
37.9719	113.502	-45.5069	-34.3751
37.9719	113.502	-44.4187	-33.0146
37.9719	113.502	-45.0593	-33.9212
37.9719	113.502	-45.5438	-33.5886
37.9719	113.502	-45.7857	-32.9659
37.9719	113.502	-45.544	-32.0305
37.9719	113.502	-45.0046	-31.9992
37.9719	113.503	-44.3207	-31.0733
37.9719	113.503	-43.6453	-30.1475
37.9719	113.503	-43.4993	-29.5459
37.9719	113.503	-42.8329	-29.0545
37.9719	113.503	-42.2383	-28.5632
37.9719	113.503	-41.3468	-28.3666
37.9719	113.503	-39.1416	-28.9563
37.9719	113.503	-39.8059	-29.3925
37.9719	113.504	-39.0398	-29.074
37.9719	113.504	-39.0384	-29.5816
37.9719	113.504	-40.1828	-31.3634
37.9719	113.504	-39.7476	-31.6445
37.9719	113.504	-36.5275	-28.8439
37.9719	113.504	-32.7197	-24.9225
37.9719	113.504	-32.0236	-24.4166
37.9719	113.504	-33.2812	-25.8713
37.9719	113.505	-34.8678	-28.0316
37.9719	113.505	-34.8055	-28.9692
37.9719	113.505	-34.9211	-29.9068
37.9719	113.505	-34.2571	-28.8285
37.9719	113.505	-34.1314	-27.9096
37.9719	113.505	-34.0158	-26.9907
37.9719	113.505	-30.5057	-22.453
37.9719	113.505	-26.5533	-17.5238
37.9719	113.506	-22.604	-12.5946
37.9719	113.506	-26.5562	-17.0264
37.9719	113.506	-31.8843	-22.8986
37.9719	113.506	-37.2962	-28.7708
37.9719	113.506	-36.5185	-27.7367
37.9719	113.506	-33.6131	-23.5847
37.9719	113.506	-23.9142	-11.0817
37.9719	113.507	-24.8055	-12.6823
37.9719	113.507	-24.713	-12.7584
37.9719	113.507	-25.9261	-11.4002
37.9719	113.507	-26.0735	-11.8614
37.9719	113.507	-25.639	-12.7431
37.9719	113.507	-25.1937	-13.6247
37.9719	113.507	-24.9514	-14.286
37.9717	113.499	1.28181	4.10631
37.9717	113.499	0.225005	3.47155
37.9717	113.499	-0.811896	2.83679
37.9717	113.499	-1.85654	2.20203
37.9717	113.499	-3.12213	0.465294
37.9717	113.499	-5.14603	-1.90754
37.9717	113.499	-10.4177	-7.19307
37.9717	113.499	-16.9908	-13.0566
37.9717	113.5	-24.8545	-19.5956
37.9717	113.5	-31.2276	-24.247
37.9717	113.5	-36.6348	-28.7493
37.9717	113.5	-39.9903	-32.2763
37.9717	113.5	-42.8528	-35.0242
37.9717	113.5	-44.9376	-36.3187
37.9717	113.5	-45.8347	-37.277
37.9717	113.5	-46.7035	-37.8443
37.9717	113.501	-48.9879	-39.7831
37.9717	113.501	-51.4553	-41.7589
37.9717	113.501	-53.8379	-43.9535
37.9717	113.501	-53.9969	-44.5689
37.9717	113.501	-51.5519	-42.1113
37.9717	113.501	-49.3906	-39.8077
37.9717	113.501	-47.7692	-37.8198
37.9717	113.501	-49.3485	-39.7069
37.9717	113.502	-48.7561	-38.8367
37.9717	113.502	-45.1424	-34.1248
37.9717	113.502	-45.5273	-34.6913
37.9717	113.502	-45.4277	-34.2335
37.9717	113.502	-44.8193	-32.1893
37.9717	113.502	-44.554	-31.966
37.9717	113.503	-44.508	-31.6324
37.9717	113.503	-44.4589	-31.2989
37.9717	113.503	-44.5396	-30.9722
37.9717	113.503	-43.3385	-30.0792
37.9717	113.503	-42.1099	-29.1861
37.9717	113.503	-41.2678	-29.1333
37.9717	113.503	-42.0277	-30.8137
37.9717	113.503	-42.141	-32.0713
37.9717	113.504	-41.2414	-32.0783
37.9717	113.504	-40.6511	-32.1876
37.9717	113.504	-41.4354	-33.662
37.9717	113.504	-41.5583	-34.3888
37.9717	113.504	-39.8593	-33.0153
37.9717	113.504	-37.7467	-30.6994
37.9717	113.504	-35.0701	-29.282
37.9717	113.504	-36.5037	-29.0225
37.9717	113.505	-36.5226	-29.179
37.9717	113.505	-36.5039	-30.011
37.9717	113.505	-36.4293	-30.843
37.9717	113.505	-35.9843	-30.017
37.9717	113.505	-35.6278	-28.775
37.9717	113.505	-35.3027	-27.533
37.9717	113.505	-32.1486	-23.4342
37.9717	113.505	-28.8779	-19.3353
37.9717	113.506	-25.5054	-15.2365
37.9717	113.506	-27.3177	-17.3916
37.9717	113.506	-36.2844	-27.7493
37.9717	113.506	-35.7803	-27.0907
37.9717	113.506	-35.7081	-26.9758
37.9717	113.506	-25.0905	-13.4166
37.9717	113.507	-24.9585	-13.2863
37.9717	113.507	-24.5261	-12.852
37.9717	113.507	-24.6888	-12.4681
37.9717	113.507	-25.4356	-14.5293
37.9717	113.507	-25.245	-15.1699
37.9717	113.507	-25.1795	-15.3413
37.9716	113.499	0.593956	3.71251
37.9716	113.499	-0.118529	3.0684
37.9716	113.499	-0.839823	2.42429
37.9716	113.499	-1.73424	1.48584
37.9716	113.499	-3.06646	-0.323212
37.9716	113.499	-6.12792	-3.5226
37.9716	113.499	-11.7225	-8.71708
37.9716	113.499	-18.773	-14.5614
37.9716	113.5	-25.9559	-20.2673
37.9716	113.5	-31.236	-24.0404
37.9716	113.5	-37.0545	-29.5553
37.9716	113.5	-41.4847	-34.0665
37.9716	113.5	-45.7961	-38.221
37.9716	113.5	-46.8558	-38.9161
37.9716	113.5	-47.5096	-39.3629
37.9716	113.5	-48.2137	-39.8097
37.9716	113.501	-49.9702	-41.2391
37.9716	113.501	-52.5988	-43.508
37.9716	113.501	-55.1306	-45.8127
37.9716	113.501	-54.9192	-45.9607
37.9716	113.501	-53.3644	-44.5612
37.9716	113.501	-50.4366	-41.0418
37.9716	113.501	-51.2433	-41.7507
37.9716	113.502	-51.7861	-42.1317
37.9716	113.502	-46.7669	-36.1478
37.9716	113.502	-45.3398	-34.6504
37.9716	113.502	-44.8458	-34.2299
37.9716	113.502	-44.6885	-33.2968
37.9716	113.502	-44.5096	-32.3636
37.9716	113.502	-44.6627	-31.9517
37.9716	113.503	-44.6976	-31.8922
37.9716	113.503	-44.6846	-31.8327
37.9716	113.503	-44.7508	-31.7731
37.9716	113.503	-43.8006	-31.2828
37.9716	113.503	-42.7707	-30.7925
37.9716	113.503	-42.7864	-31.7421
37.9716	113.503	-44.9647	-34.6219
37.9716	113.503	-46.3892	-36.8398
37.9716	113.504	-45.6232	-36.8829
37.9716	113.504	-43.749	-35.8074
37.9716	113.504	-42.8373	-35.7151
37.9716	113.504	-42.633	-36.3525
37.9716	113.504	-42.0739	-36.6631
37.9716	113.504	-37.9159	-36.6523
37.9716	113.504	-37.0192	-35.4397
37.9716	113.504	-36.3295	-34.2325
37.9716	113.505	-38.7937	-33.1203
37.9716	113.505	-38.4682	-33.3104
37.9716	113.505	-36.7804	-33.5005
37.9716	113.505	-37.4813	-32.1961
37.9716	113.505	-37.167	-30.7968
37.9716	113.505	-37.4536	-29.3974
37.9716	113.505	-34.9032	-25.9735
37.9716	113.505	-32.2253	-22.5497
37.9716	113.506	-29.4029	-19.1258
37.9716	113.506	-29.4029	-19.1258
37.9716	113.506	-35.6395	-27.5224
37.9716	113.506	-35.6395	-27.5224
37.9716	113.506	-35.6395	-27.5224
37.9716	113.507	-24.5436	-12.9151
37.9716	113.507	-24.3867	-12.7329
37.9716	113.507	-24.687	-13.1973
37.9716	113.507	-25.7053	-17.4519
37.9716	113.507	-25.7053	-17.4519
37.9716	113.507	-25.7053	-17.4519
37.9716	113.508	-24.105	-12.2643
37.9715	113.499	0.551594	4.10463
37.9715	113.499	0.121849	3.54252
37.9715	113.499	-0.329644	2.98042
37.9715	113.499	-1.06827	1.94773
37.9715	113.499	-2.43919	0.00566903
37.9715	113.499	-5.57557	-3.32923
37.9715	113.499	-11.6962	-8.8647
37.9715	113.499	-18.0361	-13.9735
37.9715	113.5	-24.6313	-19.1763
37.9715	113.5	-29.242	-22.4313
37.9715	113.5	-39.0248	-31.8688
37.9715	113.5	-43.3408	-36.8674
37.9715	113.5	-46.7369	-40.7553
37.9715	113.5	-47.7355	-41.1918
37.9715	113.5	-48.8441	-41.7868
37.9715	113.5	-49.931	-42.3819
37.9715	113.501	-51.071	-43.3519
37.9715	113.501	-54.4028	-45.8667
37.9715	113.501	-54.4384	-45.8669
37.9715	113.501	-54.0024	-45.719
37.9715	113.501	-53.1704	-44.7694
37.9715	113.501	-52.5089	-43.4653
37.9715	113.501	-52.3982	-42.7126
37.9715	113.502	-52.8172	-42.8292
37.9715	113.502	-51.7223	-41.6004
37.9715	113.502	-44.2444	-33.9169
37.9715	113.502	-43.873	-33.5961
37.9715	113.502	-44.2025	-33.0167
37.9715	113.502	-43.9263	-32.0075
37.9715	113.502	-43.7704	-31.0918
37.9715	113.503	-42.9922	-30.5973
37.9715	113.503	-43.1928	-30.8481
37.9715	113.503	-43.4123	-31.0989
37.9715	113.503	-45.0655	-32.9617
37.9715	113.503	-46.0798	-34.5089
37.9715	113.503	-46.5319	-37.2873
37.9715	113.503	-49.3344	-39.7494
37.9715	113.503	-50.4158	-41.4394
37.9715	113.504	-49.8436	-41.307
37.9715	113.504	-47.6867	-39.8653
37.9715	113.504	-45.9456	-39.1175
37.9715	113.504	-45.2523	-39.6536
37.9715	113.504	-41.2845	-40.9607
37.9715	113.504	-42.9122	-42.346
37.9715	113.504	-42.9497	-41.7499
37.9715	113.504	-42.2953	-40.4612
37.9715	113.505	-42.2256	-39.2595
37.9715	113.505	-42.4473	-39.4335
37.9715	113.505	-42.5906	-39.6076
37.9715	113.505	-43.4435	-37.4297
37.9715	113.505	-41.7625	-35.1648
37.9715	113.505	-40.1801	-32.8999
37.9715	113.505	-37.8275	-29.45
37.9715	113.505	-35.8043	-26.6452
37.9715	113.506	-33.6529	-23.8404
37.9715	113.506	-35.5454	-26.1124
37.9715	113.506	-36.6222	-28.8946
37.9715	113.506	-35.3151	-27.5039
37.9715	113.506	-34.4225	-26.1379
37.9715	113.507	-24.6219	-13.1168
37.9715	113.507	-24.7894	-13.3459
37.9715	113.507	-25.3675	-14.1094
37.9715	113.507	-25.539	-14.3385
37.9715	113.507	-25.9124	-18.9568
37.9715	113.507	-25.7548	-18.7549
37.9715	113.507	-24.9944	-17.6367
37.9715	113.508	-25.2207	-14.3109
37.9714	113.499	1.96982	5.54608
37.9714	113.499	1.22321	4.51991
37.9714	113.499	0.458902	3.49374
37.9714	113.499	-1.28191	1.26312
37.9714	113.499	-3.15387	-1.07919
37.9714	113.499	-7.34451	-5.33968
37.9714	113.499	-12.1872	-9.85244
37.9714	113.499	-17.0764	-13.9932
37.9714	113.5	-24.6419	-20.7699
37.9714	113.5	-45.4975	-40.2582
37.9714	113.5	-46.4259	-41.6579
37.9714	113.5	-47.1625	-41.8025
37.9714	113.5	-49.197	-43.0324
37.9714	113.5	-51.382	-44.2624
37.9714	113.501	-52.0477	-44.9757
37.9714	113.501	-52.6574	-45.3569
37.9714	113.501	-54.4031	-46.6736
37.9714	113.501	-54.2176	-46.7116
37.9714	113.501	-53.7774	-46.0973
37.9714	113.501	-51.9199	-42.1765
37.9714	113.502	-52.0293	-42.1423
37.9714	113.502	-52.1178	-42.1552
37.9714	113.502	-42.6597	-33.0293
37.9714	113.502	-42.6597	-33.0293
37.9714	113.502	-43.2695	-32.7598
37.9714	113.502	-42.2161	-30.905
37.9714	113.502	-41.1365	-29.0503
37.9714	113.503	-40.4577	-28.7891
37.9714	113.503	-42.0019	-30.2501
37.9714	113.503	-43.5529	-31.7112
37.9714	113.503	-47.3103	-35.613
37.9714	113.503	-50.0531	-38.7595
37.9714	113.503	-51.3327	-42.5495
37.9714	113.503	-50.772	-43.8366
37.9714	113.503	-51.2981	-44.7566
37.9714	113.504	-52.9898	-44.6634
37.9714	113.504	-51.1255	-44.1125
37.9714	113.504	-46.3351	-44.1147
37.9714	113.504	-45.6816	-45.0729
37.9714	113.504	-46.721	-46.4316
37.9714	113.504	-47.9493	-47.6043
37.9714	113.504	-48.7511	-47.7026
37.9714	113.504	-49.2727	-47.2146
37.9714	113.505	-50.2773	-46.7289
37.9714	113.505	-50.6016	-46.633
37.9714	113.505	-50.3648	-46.5371
37.9714	113.505	-49.1318	-43.6379
37.9714	113.505	-46.3092	-40.4254
37.9714	113.505	-43.6286	-37.2129
37.9714	113.505	-41.0739	-33.6667
37.9714	113.505	-39.4685	-31.1417
37.9714	113.506	-37.8508	-28.6167
37.9714	113.506	-40.36	-31.5195
37.9714	113.506	-39.6427	-31.3815
37.9714	113.506	-37.111	-29.1089
37.9714	113.506	-34.0793	-25.7888
37.9714	113.506	-32.8352	-23.7418
37.9714	113.506	-32.4678	-23.1277
37.9714	113.507	-25.826	-14.8346
37.9714	113.507	-26.2815	-15.4433
37.9714	113.507	-26.3479	-15.5282
37.9714	113.507	-25.173	-18.4374
37.9714	113.507	-24.8351	-17.8923
37.9714	113.507	-23.693	-16.0752
37.9714	113.508	-23.3815	-15.5301
37.9714	113.508	-27.6051	-17.2956
37.9714	113.508	-27.6051	-17.2956
37.9712	113.499	4.23365	7.26064
37.9712	113.499	2.79371	5.3573
37.9712	113.499	0.756065	2.95866
37.9712	113.499	-2.48143	-0.703702
37.9712	113.499	-5.4618	-3.86233
37.9712	113.499	-9.65873	-8.12871
37.9712	113.499	-14.2157	-12.7074
37.9712	113.499	-17.497	-15.8595
37.9712	113.5	-26.8399	-24.5662
37.9712	113.5	-37.3393	-33.7342
37.9712	113.5	-49.7519	-44.4787
37.9712	113.5	-47.6186	-43.0183
37.9712	113.5	-46.0191	-41.8825
37.9712	113.5	-46.4831	-42.3373
37.9712	113.5	-51.4334	-45.4002
37.9712	113.501	-52.3546	-45.8129
37.9712	113.501	-52.4068	-45.8922
37.9712	113.501	-55.3152	-49.0129
37.9712	113.501	-55.3152	-49.0129
37.9712	113.501	-55.3152	-49.0129
37.9712	113.501	-49.7955	-40.5738
37.9712	113.502	-49.7955	-40.5738
37.9712	113.502	-49.7955	-40.5738
37.9712	113.502	-42.1105	-33.113
37.9712	113.502	-42.234	-33.2675
37.9712	113.502	-43.5157	-33.9292
37.9712	113.502	-39.5018	-28.804
37.9712	113.503	-38.6177	-28.0399
37.9712	113.503	-42.105	-31.1552
37.9712	113.503	-45.6834	-34.2705
37.9712	113.503	-49.8483	-38.7615
37.9712	113.503	-51.9265	-41.434
37.9712	113.503	-53.8898	-44.5924
37.9712	113.503	-51.9897	-45.5641
37.9712	113.503	-52.4382	-47.1742
37.9712	113.504	-55.0048	-48.6367
37.9712	113.504	-52.9559	-49.9797
37.9712	113.504	-52.8022	-51.0504
37.9712	113.504	-53.3479	-51.9255
37.9712	113.504	-53.4705	-52.5767
37.9712	113.504	-53.6784	-52.8617
37.9712	113.504	-54.8515	-53.2703
37.9712	113.504	-56.1409	-53.5363
37.9712	113.505	-58.1938	-53.7757
37.9712	113.505	-57.3619	-52.5302
37.9712	113.505	-56.7946	-51.2846
37.9712	113.505	-53.1035	-47.4815
37.9712	113.505	-49.6649	-43.9475
37.9712	113.505	-46.3993	-40.4134
37.9712	113.505	-43.8803	-37.292
37.9712	113.506	-41.4346	-32.7437
37.9712	113.506	-43.3599	-34.8023
37.9712	113.506	-42.6608	-34.2297
37.9712	113.506	-32.5532	-23.1674
37.9712	113.506	-31.789	-21.8247
37.9712	113.506	-31.9602	-21.8828
37.9712	113.507	-27.1504	-16.8386
37.9712	113.507	-27.1504	-16.8386
37.9712	113.507	-27.1504	-16.8386
37.9712	113.507	-23.8717	-16.017
37.9712	113.507	-23.2521	-14.8464
37.9712	113.508	-23.1414	-14.6445
37.9712	113.508	-25.988	-15.7952
37.9712	113.508	-25.8126	-15.6224
37.9711	113.499	6.35815	8.77533
37.9711	113.499	4.03582	5.65331
37.9711	113.499	0.307582	1.51986
37.9711	113.499	-4.95407	-4.0111
37.9711	113.499	-9.23429	-8.1445
37.9711	113.499	-13.541	-12.3301
37.9711	113.499	-17.6539	-16.6771
37.9711	113.499	-20.5673	-19.7949
37.9711	113.5	-31.077	-29.1823
37.9711	113.5	-40.6105	-37.0109
37.9711	113.5	-49.4515	-44.2019
37.9711	113.5	-48.1469	-43.6394
37.9711	113.5	-46.9628	-43.0768
37.9711	113.5	-47.441	-43.8844
37.9711	113.5	-49.1299	-45.0644
37.9711	113.5	-50.9743	-46.2445
37.9711	113.501	-51.8133	-46.2985
37.9711	113.501	-51.8133	-46.2985
37.9711	113.501	-57.0039	-51.9929
37.9711	113.501	-57.1923	-52.191
37.9711	113.501	-58.6124	-53.6069
37.9711	113.501	-50.1771	-42.5847
37.9711	113.502	-48.2071	-39.9862
37.9711	113.502	-49.5153	-41.4931
37.9711	113.502	-44.9524	-36.3465
37.9711	113.502	-43.4425	-34.5457
37.9711	113.502	-45.0101	-35.9366
37.9711	113.502	-42.3648	-33.1949
37.9711	113.502	-39.7562	-30.4532
37.9711	113.503	-40.25	-30.5218
37.9711	113.503	-45.5015	-35.2068
37.9711	113.503	-50.3652	-39.5828
37.9711	113.503	-51.8784	-41.8713
37.9711	113.503	-51.0021	-42.0667
37.9711	113.503	-52.0715	-44.1938
37.9711	113.503	-52.5349	-46.7402
37.9711	113.503	-55.4066	-50.6903
37.9711	113.504	-59.6407	-54.5217
37.9711	113.504	-60.8705	-57.2282
37.9711	113.504	-61.7958	-58.33
37.9711	113.504	-61.211	-58.0931
37.9711	113.504	-60.335	-58.2228
37.9711	113.504	-60.4394	-58.5537
37.9711	113.504	-60.6761	-58.2229
37.9711	113.504	-60.8864	-57.7268
37.9711	113.505	-61.444	-57.0734
37.9711	113.505	-60.3856	-54.686
37.9711	113.505	-58.117	-52.2986
37.9711	113.505	-54.3702	-48.4424
37.9711	113.505	-51.3019	-45.5241
37.9711	113.505	-48.3848	-42.6059
37.9711	113.505	-48.0197	-42.0254
37.9711	113.506	-46.2154	-37.9249
37.9711	113.506	-45.2043	-36.5298
37.9711	113.506	-45.2043	-36.5298
37.9711	113.506	-31.6574	-21.3292
37.9711	113.506	-31.832	-21.4938
37.9711	113.506	-32.3416	-22.0421
37.9711	113.506	-32.5032	-22.2067
37.9711	113.507	-27.8807	-17.9489
37.9711	113.507	-27.8807	-17.9489
37.9711	113.507	-27.8807	-17.9489
37.9711	113.507	-24.1261	-15.417
37.9711	113.507	-24.1261	-15.417
37.9711	113.508	-24.1261	-15.417
37.9711	113.508	-23.3096	-13.2579
37.9711	113.508	-23.3096	-13.2579
37.9711	113.508	-23.0772	-13.0337
37.971	113.498	7.34409	10.0409
37.971	113.499	6.85815	9.0011
37.971	113.499	3.58673	4.84846
37.971	113.499	-1.45107	-0.521692
37.971	113.499	-7.50267	-6.71328
37.971	113.499	-12.2314	-11.177
37.971	113.499	-16.34	-15.0406
37.971	113.499	-21.03	-19.9473
37.971	113.499	-24.6557	-23.6761
37.971	113.5	-33.275	-31.2276
37.971	113.5	-40.2934	-36.9147
37.971	113.5	-47.0732	-42.2831
37.971	113.5	-47.6792	-43.3322
37.971	113.5	-48.3905	-44.3814
37.971	113.5	-49.886	-46.0749
37.971	113.5	-50.3789	-46.3142
37.971	113.5	-51.1542	-46.8792
37.971	113.501	-51.748	-47.1186
37.971	113.501	-52.4858	-48.1545
37.971	113.501	-58.4809	-54.3452
37.971	113.501	-59.8085	-55.2662
37.971	113.501	-61.8236	-57.0495
37.971	113.501	-57.3905	-52.0299
37.971	113.501	-52.8419	-46.3009
37.971	113.502	-49.1389	-41.6285
37.971	113.502	-51.3578	-43.9518
37.971	113.502	-50.1267	-42.6172
37.971	113.502	-46.7565	-37.6831
37.971	113.502	-48.0941	-38.8628
37.971	113.502	-45.3478	-36.464
37.971	113.502	-42.6987	-34.0651
37.971	113.503	-42.4676	-33.7505
37.971	113.503	-48.659	-39.1596
37.971	113.503	-53.3146	-43.5015
37.971	113.503	-53.1183	-44.3053
37.971	113.503	-49.4433	-42.0935
37.971	113.503	-51.7904	-45.3388
37.971	113.503	-55.6594	-50.4904
37.971	113.503	-62.5055	-57.3052
37.971	113.504	-66.6066	-61.481
37.971	113.504	-68.8973	-64.1151
37.971	113.504	-69.3031	-64.4098
37.971	113.504	-68.4438	-63.3945
37.971	113.504	-67.8926	-63.6001
37.971	113.504	-68.1356	-64.4819
37.971	113.504	-66.639	-62.4452
37.971	113.504	-63.6797	-59.9675
37.971	113.505	-61.5774	-57.4898
37.971	113.505	-60.7809	-54.848
37.971	113.505	-58.4174	-52.2063
37.971	113.505	-55.0936	-48.7048
37.971	113.505	-52.8373	-46.7136
37.971	113.505	-50.7118	-44.7225
37.971	113.505	-50.7258	-44.267
37.971	113.505	-48.9562	-41.7831
37.971	113.506	-47.5974	-39.3992
37.971	113.506	-45.6681	-37.145
37.971	113.506	-45.8291	-37.4555
37.971	113.506	-32.6345	-22.5319
37.971	113.506	-33.0373	-22.9638
37.971	113.506	-33.0888	-23.0248
37.971	113.507	-28.4155	-18.5858
37.971	113.507	-28.4155	-18.5858
37.971	113.507	-28.4155	-18.5858
37.971	113.507	-26.7416	-18.716
37.971	113.507	-25.8633	-17.5039
37.971	113.508	-26.347	-17.8388
37.971	113.508	-22.9498	-13.2618
37.971	113.508	-21.2306	-11.392
37.971	113.508	-21.1154	-11.2431
37.971	113.508	-21.3926	-10.6876
37.9709	113.498	7.60008	10.2919
37.9709	113.499	6.23377	8.50615
37.9709	113.499	1.85223	3.58601
37.9709	113.499	-3.7548	-2.16041
37.9709	113.499	-10.0655	-8.57737
37.9709	113.499	-14.3453	-12.7944
37.9709	113.499	-18.6145	-16.8873
37.9709	113.499	-24.0466	-22.4102
37.9709	113.499	-29.1906	-27.2599
37.9709	113.5	-35.9336	-33.2565
37.9709	113.5	-40.6488	-37.1526
37.9709	113.5	-45.5065	-41.0486
37.9709	113.5	-47.77	-43.3703
37.9709	113.5	-50.05	-45.692
37.9709	113.5	-52.4048	-48.0137
37.9709	113.5	-52.0191	-47.648
37.9709	113.5	-52.3569	-48.1992
37.9709	113.501	-52.7939	-48.7503
37.9709	113.501	-54.1229	-50.2164
37.9709	113.501	-54.8102	-50.9787
37.9709	113.501	-61.0805	-56.3519
37.9709	113.501	-62.2966	-57.3749
37.9709	113.501	-59.9498	-54.7974
37.9709	113.502	-51.4176	-44.5433
37.9709	113.502	-52.8976	-46.1263
37.9709	113.502	-53.1685	-46.3844
37.9709	113.502	-51.5844	-42.3972
37.9709	113.502	-51.5844	-42.3972
37.9709	113.502	-48.38	-39.7639
37.9709	113.502	-45.1883	-37.1305
37.9709	113.503	-45.2717	-37.2222
37.9709	113.503	-51.7542	-42.763
37.9709	113.503	-56.0072	-46.8277
37.9709	113.503	-54.8184	-46.7766
37.9709	113.503	-51.1071	-44.7995
37.9709	113.503	-55.4431	-49.8935
37.9709	113.503	-62.1075	-57.3197
37.9709	113.503	-70.8438	-64.7058
37.9709	113.504	-74.1775	-68.6225
37.9709	113.504	-75.8719	-70.1996
37.9709	113.504	-76.5227	-70.3178
37.9709	113.504	-75.8428	-68.8125
37.9709	113.504	-75.9587	-69.2077
37.9709	113.504	-76.0762	-70.212
37.9709	113.504	-70.3281	-65.5405
37.9709	113.504	-64.5141	-60.3668
37.9709	113.505	-58.9137	-55.1931
37.9709	113.505	-58.0422	-53.1026
37.9709	113.505	-57.5497	-51.0122
37.9709	113.505	-55.4962	-48.6003
37.9709	113.505	-53.937	-47.3366
37.9709	113.505	-52.6561	-46.0729
37.9709	113.505	-52.4881	-45.4311
37.9709	113.505	-50.958	-43.4825
37.9709	113.506	-48.8584	-40.8031
37.9709	113.506	-46.1538	-37.7857
37.9709	113.506	-46.3574	-38.1856
37.9709	113.506	-46.5772	-38.3055
37.9709	113.506	-33.5331	-23.8932
37.9709	113.506	-33.5331	-23.8932
37.9709	113.506	-33.5331	-23.8932
37.9709	113.507	-30.2869	-21.1276
37.9709	113.507	-30.2869	-21.1276
37.9709	113.507	-30.2869	-21.1276
37.9709	113.507	-29.2114	-21.9489
37.9709	113.507	-28.8769	-21.4706
37.9709	113.507	-27.7018	-19.8761
37.9709	113.508	-28.083	-19.8301
37.9709	113.508	-26.7508	-17.6372
37.9709	113.508	-26.2913	-16.8952
37.9709	113.508	-23.6611	-14.149
37.9709	113.508	-22.5773	-12.9659
37.9709	113.508	-21.5921	-11.6512
37.9707	113.498	5.77839	8.36623
37.9707	113.499	2.73165	5.38049
37.9707	113.499	-2.87087	-0.143822
37.9707	113.499	-7.77669	-5.22096
37.9707	113.499	-13.1778	-10.6756
37.9707	113.499	-17.0781	-14.1439
37.9707	113.499	-21.3071	-18.2177
37.9707	113.499	-27.2589	-24.4099
37.9707	113.499	-32.8421	-30.0498
37.9707	113.5	-38.5351	-35.4632
37.9707	113.5	-42.0156	-38.3808
37.9707	113.5	-45.5978	-41.2985
37.9707	113.5	-48.4548	-43.966
37.9707	113.5	-51.4708	-46.9085
37.9707	113.5	-54.5783	-49.8509
37.9707	113.5	-54.6714	-50.2749
37.9707	113.501	-54.8231	-51.2629
37.9707	113.501	-55.4034	-51.7707
37.9707	113.501	-55.4814	-52.014
37.9707	113.501	-59.1039	-54.6856
37.9707	113.501	-59.9242	-55.0538
37.9707	113.501	-59.9242	-55.0538
37.9707	113.502	-52.2273	-46.6029
37.9707	113.502	-52.2273	-46.6029
37.9707	113.502	-50.8501	-44.6772
37.9707	113.502	-50.8059	-41.6222
37.9707	113.502	-52.4986	-43.5544
37.9707	113.502	-49.8876	-41.6222
37.9707	113.502	-47.2913	-39.69
37.9707	113.503	-47.2348	-39.7511
37.9707	113.503	-53.9892	-45.7313
37.9707	113.503	-58.7132	-50.3068
37.9707	113.503	-58.835	-51.1731
37.9707	113.503	-56.546	-50.3411
37.9707	113.503	-61.2538	-56.1836
37.9707	113.503	-69.1163	-64.1461
37.9707	113.503	-77.0586	-71.1509
37.9707	113.504	-79.2252	-73.9671
37.9707	113.504	-80.071	-74.2795
37.9707	113.504	-80.3232	-73.6731
37.9707	113.504	-80.1369	-72.2367
37.9707	113.504	-80.3318	-72.6356
37.9707	113.504	-80.4662	-73.1382
37.9707	113.504	-72.2536	-66.7629
37.9707	113.504	-64.4017	-60.1363
37.9707	113.505	-57.002	-53.5097
37.9707	113.505	-56.6231	-51.8888
37.9707	113.505	-57.1326	-50.2679
37.9707	113.505	-56.0125	-48.6471
37.9707	113.505	-54.7788	-47.6
37.9707	113.505	-53.8058	-46.5529
37.9707	113.505	-52.9298	-45.5058
37.9707	113.505	-52.0385	-44.3173
37.9707	113.506	-46.3278	-38.1378
37.9707	113.506	-46.5252	-38.3853
37.9707	113.506	-46.5873	-38.4298
37.9707	113.506	-34.9888	-26.0767
37.9707	113.506	-34.9888	-26.0767
37.9707	113.506	-34.9888	-26.0767
37.9707	113.507	-33.8895	-26.048
37.9707	113.507	-33.8895	-26.048
37.9707	113.507	-33.8565	-26.4526
37.9707	113.507	-31.2663	-24.8405
37.9707	113.507	-30.5133	-23.7112
37.9707	113.507	-29.6899	-22.6051
37.9707	113.508	-29.143	-20.5985
37.9707	113.508	-29.0485	-20.0701
37.9707	113.508	-26.1475	-17.0806
37.9707	113.508	-23.9791	-14.7452
37.9707	113.508	-21.8477	-12.5843
37.9707	113.508	-22.8669	-14.0363
37.9706	113.498	3.57365	5.86934
37.9706	113.499	-1.88026	1.09958
37.9706	113.499	-9.22187	-5.78155
37.9706	113.499	-12.9312	-10.0043
37.9706	113.499	-17.1158	-14.1974
37.9706	113.499	-20.2265	-16.2664
37.9706	113.499	-24.1581	-19.5539
37.9706	113.499	-28.6502	-24.6333
37.9706	113.499	-32.8811	-29.7254
37.9706	113.5	-36.9359	-33.8361
37.9706	113.5	-40.5215	-36.9985
37.9706	113.5	-44.204	-40.1608
37.9706	113.5	-46.2062	-42.1038
37.9706	113.5	-50.1317	-45.9186
37.9706	113.5	-54.0014	-49.7333
37.9706	113.5	-57.0911	-53.0374
37.9706	113.5	-56.8096	-53.1248
37.9706	113.501	-56.31	-53.1364
37.9706	113.501	-55.7842	-52.4383
37.9706	113.501	-55.6485	-52.4536
37.9706	113.501	-55.791	-52.2638
37.9706	113.501	-56.1853	-52.1001
37.9706	113.501	-56.8642	-51.9862
37.9706	113.501	-56.7066	-51.8364
37.9706	113.502	-50.3904	-45.8378
37.9706	113.502	-49.5839	-45.011
37.9706	113.502	-47.8	-42.039
37.9706	113.502	-47.7994	-40.1401
37.9706	113.502	-47.5984	-38.2413
37.9706	113.502	-50.276	-41.4947
37.9706	113.502	-49.4699	-41.4718
37.9706	113.502	-48.7437	-41.449
37.9706	113.503	-50.8689	-43.6363
37.9706	113.503	-57.3245	-49.5027
37.9706	113.503	-62.5568	-54.697
37.9706	113.503	-62.8901	-55.679
37.9706	113.503	-63.3109	-57.1543
37.9706	113.503	-66.8259	-62.2756
37.9706	113.503	-72.8806	-69.0821
37.9706	113.503	-78.3684	-74.1401
37.9706	113.504	-81.1786	-77.0331
37.9706	113.504	-81.9124	-76.8429
37.9706	113.504	-81.8789	-75.7991
37.9706	113.504	-81.2461	-73.8487
37.9706	113.504	-80.9927	-73.6537
37.9706	113.504	-80.8296	-73.4586
37.9706	113.504	-72.031	-66.5061
37.9706	113.504	-63.6646	-59.4771
37.9706	113.505	-55.778	-52.4481
37.9706	113.505	-55.3479	-51.1172
37.9706	113.505	-55.9238	-49.7935
37.9706	113.505	-55.8555	-48.4698
37.9706	113.505	-54.7761	-47.2833
37.9706	113.505	-53.6856	-46.206
37.9706	113.505	-52.845	-45.1286
37.9706	113.505	-52.6981	-45.0987
37.9706	113.506	-46.635	-39.1394
37.9706	113.506	-45.8254	-38.1184
37.9706	113.506	-45.8254	-38.1184
37.9706	113.506	-37.5666	-29.4152
37.9706	113.506	-37.5666	-29.4152
37.9706	113.506	-38.445	-31.0462
37.9706	113.507	-39.7114	-33.4001
37.9706	113.507	-38.3584	-31.7456
37.9706	113.507	-37.242	-30.8734
37.9706	113.507	-34.6145	-28.7021
37.9706	113.507	-32.6637	-26.9986
37.9706	113.507	-31.905	-25.7441
37.9706	113.507	-31.3717	-24.9917
37.9706	113.508	-30.5996	-23.3246
37.9706	113.508	-30.6011	-22.8739
37.9706	113.508	-30.3816	-22.0887
37.9706	113.508	-27.2872	-18.7575
37.9706	113.508	-24.1954	-15.3069
37.9706	113.508	-22.3597	-13.7618
37.9706	113.508	-23.5961	-15.889
37.9706	113.508	-24.7435	-17.9733
37.9705	113.498	2.28121	4.26147
37.9705	113.499	-5.58906	-2.56244
37.9705	113.499	-14.5893	-11.0055
37.9705	113.499	-16.8986	-14.2437
37.9705	113.499	-19.8859	-17.2626
37.9705	113.499	-22.7918	-18.4602
37.9705	113.499	-25.9846	-20.0719
37.9705	113.499	-28.0585	-22.8647
37.9705	113.499	-29.4877	-25.8597
37.9705	113.5	-31.7237	-28.1976
37.9705	113.5	-35.6581	-32.0151
37.9705	113.5	-39.3005	-35.8326
37.9705	113.5	-41.857	-38.4426
37.9705	113.5	-47.3937	-43.7073
37.9705	113.5	-52.3999	-48.6185
37.9705	113.5	-57.3434	-53.6362
37.9705	113.5	-56.1936	-52.6833
37.9705	113.501	-54.2311	-51.295
37.9705	113.501	-54.4305	-51.5724
37.9705	113.501	-54.4442	-51.2764
37.9705	113.501	-54.6603	-50.9096
37.9705	113.501	-55.473	-50.539
37.9705	113.501	-55.5331	-50.643
37.9705	113.501	-52.1166	-47.6692
37.9705	113.502	-48.8397	-44.6955
37.9705	113.502	-46.7567	-42.6611
37.9705	113.502	-45.7356	-40.26
37.9705	113.502	-45.9741	-38.6171
37.9705	113.502	-46.055	-37.3231
37.9705	113.502	-48.2449	-40.2785
37.9705	113.502	-49.2311	-41.9523
37.9705	113.502	-51.0675	-44.1607
37.9705	113.503	-55.4537	-48.3799
37.9705	113.503	-61.7194	-54.3959
37.9705	113.503	-66.0271	-59.3207
37.9705	113.503	-66.0445	-60.136
37.9705	113.503	-67.3055	-62.5491
37.9705	113.503	-69.2482	-66.6862
37.9705	113.503	-74.0395	-72.0058
37.9705	113.503	-77.8808	-75.3861
37.9705	113.504	-80.1413	-77.2503
37.9705	113.504	-80.5243	-76.7068
37.9705	113.504	-79.8822	-75.2311
37.9705	113.504	-79.1803	-73.438
37.9705	113.504	-77.7631	-72.237
37.9705	113.504	-76.8029	-71.036
37.9705	113.504	-70.2534	-65.3446
37.9705	113.504	-62.6517	-58.918
37.9705	113.505	-55.5022	-52.4914
37.9705	113.505	-53.6439	-50.2563
37.9705	113.505	-54.9913	-49.1391
37.9705	113.505	-55.018	-48.022
37.9705	113.505	-54.2685	-46.8507
37.9705	113.505	-53.4003	-46.0072
37.9705	113.505	-52.7063	-45.1637
37.9705	113.505	-52.4707	-45.0594
37.9705	113.506	-49.6215	-42.4563
37.9705	113.506	-46.7079	-39.8532
37.9705	113.506	-45.3534	-38.0492
37.9705	113.506	-45.3534	-38.0492
37.9705	113.506	-39.8684	-32.1708
37.9705	113.506	-39.8684	-32.1708
37.9705	113.506	-41.2762	-34.3361
37.9705	113.507	-42.4658	-36.1807
37.9705	113.507	-43.9057	-38.0252
37.9705	113.507	-42.3489	-36.1538
37.9705	113.507	-38.7915	-33.0755
37.9705	113.507	-35.2624	-29.6834
37.9705	113.507	-33.4669	-28.3229
37.9705	113.507	-32.9235	-27.4467
37.9705	113.508	-30.6248	-23.7923
37.9705	113.508	-30.6396	-23.6934
37.9705	113.508	-29.9431	-22.4404
37.9705	113.508	-24.6606	-15.9748
37.9705	113.508	-23.5298	-15.5928
37.9705	113.508	-24.4418	-17.6803
37.9705	113.508	-25.239	-19.6083
37.9704	113.498	1.20777	2.86159
37.9704	113.499	-7.78555	-4.94585
37.9704	113.499	-17.3147	-13.9076
37.9704	113.499	-18.5782	-16.2163
37.9704	113.499	-20.848	-18.5644
37.9704	113.499	-23.4064	-19.7975
37.9704	113.499	-26.1146	-20.8929
37.9704	113.499	-26.8607	-22.0611
37.9704	113.499	-26.9244	-23.1899
37.9704	113.5	-27.5857	-23.7608
37.9704	113.5	-31.196	-27.7471
37.9704	113.5	-34.7276	-31.7335
37.9704	113.5	-37.4917	-34.697
37.9704	113.5	-42.7245	-39.5345
37.9704	113.5	-49.1961	-45.7033
37.9704	113.5	-56.0959	-52.5069
37.9704	113.5	-54.5298	-50.9161
37.9704	113.501	-53.099	-50.1936
37.9704	113.501	-52.0281	-49.4711
37.9704	113.501	-52.4522	-49.7848
37.9704	113.501	-52.6808	-49.8703
37.9704	113.501	-55.5318	-51.0952
37.9704	113.501	-55.6038	-51.237
37.9704	113.501	-52.3917	-48.5141
37.9704	113.502	-49.278	-45.7913
37.9704	113.502	-46.4256	-43.0453
37.9704	113.502	-46.2994	-42.0726
37.9704	113.502	-47.077	-41.0998
37.9704	113.502	-48.0456	-40.6099
37.9704	113.502	-49.5224	-42.5594
37.9704	113.502	-50.7273	-44.5089
37.9704	113.502	-55.0751	-48.6259
37.9704	113.503	-61.3044	-54.1706
37.9704	113.503	-65.4306	-59.3928
37.9704	113.503	-65.7761	-61.8195
37.9704	113.503	-64.7797	-61.763
37.9704	113.503	-66.9181	-64.9554
37.9704	113.503	-70.2089	-68.9261
37.9704	113.503	-74.7779	-73.3589
37.9704	113.503	-77.4034	-75.4793
37.9704	113.504	-79.2881	-76.9665
37.9704	113.504	-79.5118	-76.1954
37.9704	113.504	-78.5758	-74.8104
37.9704	113.504	-77.3292	-73.1404
37.9704	113.504	-75.0514	-70.8212
37.9704	113.504	-73.0471	-68.502
37.9704	113.504	-68.4005	-63.9844
37.9704	113.504	-62.7717	-59.1177
37.9704	113.505	-57.6484	-54.2511
37.9704	113.505	-54.8697	-51.6623
37.9704	113.505	-55.0694	-50.5508
37.9704	113.505	-55.8162	-49.4392
37.9704	113.505	-55.2243	-48.3096
37.9704	113.505	-54.2292	-47.334
37.9704	113.505	-53.3103	-46.3585
37.9704	113.505	-52.4861	-45.637
37.9704	113.506	-50.1567	-43.2941
37.9704	113.506	-47.8712	-40.9511
37.9704	113.506	-45.6917	-38.5777
37.9704	113.506	-45.6917	-38.5777
37.9704	113.506	-40.821	-33.1885
37.9704	113.506	-40.821	-33.1885
37.9704	113.506	-42.165	-35.4397
37.9704	113.507	-43.44	-37.2751
37.9704	113.507	-44.8608	-39.1104
37.9704	113.507	-43.7452	-37.9306
37.9704	113.507	-36.28	-31.0141
37.9704	113.507	-35.6524	-30.6254
37.9704	113.507	-35.6524	-30.6254
37.9704	113.508	-30.4756	-24.0239
37.9704	113.508	-30.4756	-24.0239
37.9704	113.508	-29.3151	-22.3926
37.9704	113.508	-27.2084	-19.458
37.9704	113.508	-24.9358	-16.6788
37.9704	113.508	-24.3778	-17.3285
37.9704	113.508	-24.456	-18.6735
37.9704	113.508	-24.6516	-19.6829
37.9704	113.509	-24.6928	-19.7605
37.9702	113.498	0.000346587	1.09456
37.9702	113.499	-8.34107	-6.04176
37.9702	113.499	-17.0032	-14.1594
37.9702	113.499	-18.1424	-16.1221
37.9702	113.499	-20.7164	-18.71
37.9702	113.499	-23.955	-20.9418
37.9702	113.499	-26.4336	-22.1923
37.9702	113.499	-27.5828	-23.3907
37.9702	113.499	-27.6755	-23.964
37.9702	113.5	-28.3984	-24.5372
37.9702	113.5	-31.3645	-27.7957
37.9702	113.5	-34.0858	-31.0542
37.9702	113.5	-37.2816	-34.3127
37.9702	113.5	-40.4113	-37.2527
37.9702	113.5	-52.3646	-48.8778
37.9702	113.5	-51.0447	-47.5218
37.9702	113.501	-50.2158	-47.2762
37.9702	113.501	-49.5091	-47.0306
37.9702	113.501	-49.4765	-47.1386
37.9702	113.501	-49.4765	-47.1386
37.9702	113.501	-55.7326	-52.2518
37.9702	113.501	-55.7326	-52.2518
37.9702	113.501	-53.4279	-50.4751
37.9702	113.502	-51.2695	-48.6984
37.9702	113.502	-49.403	-46.9216
37.9702	113.502	-49.5392	-46.2132
37.9702	113.502	-50.3661	-45.5048
37.9702	113.502	-51.3294	-45.6184
37.9702	113.502	-51.5293	-47.0451
37.9702	113.502	-52.9725	-48.3657
37.9702	113.502	-56.2441	-52.2246
37.9702	113.503	-59.8939	-56.4436
37.9702	113.503	-63.3512	-60.9594
37.9702	113.503	-62.6718	-61.5859
37.9702	113.503	-63.6151	-62.4542
37.9702	113.503	-67.2693	-66.0117
37.9702	113.503	-71.6223	-70.098
37.9702	113.503	-76.7463	-74.4686
37.9702	113.503	-78.808	-76.2627
37.9702	113.504	-80.9796	-78.0568
37.9702	113.504	-79.4686	-75.834
37.9702	113.504	-76.8108	-73.308
37.9702	113.504	-74.4434	-70.6785
37.9702	113.504	-72.3168	-68.5238
37.9702	113.504	-70.3507	-66.3692
37.9702	113.504	-68.0729	-63.8557
37.9702	113.504	-64.8482	-60.8912
37.9702	113.505	-61.7984	-57.9268
37.9702	113.505	-59.4408	-55.4246
37.9702	113.505	-58.9079	-54.2083
37.9702	113.505	-59.0132	-52.9919
37.9702	113.505	-58.191	-51.7756
37.9702	113.505	-56.4423	-50.0383
37.9702	113.505	-54.7306	-48.301
37.9702	113.505	-53.0158	-46.5637
37.9702	113.506	-50.7908	-44.1519
37.9702	113.506	-48.9864	-42.2229
37.9702	113.506	-47.1711	-40.2938
37.9702	113.506	-48.3342	-41.8643
37.9702	113.506	-43.3514	-36.1776
37.9702	113.506	-41.7014	-34.1419
37.9702	113.506	-42.3418	-35.4819
37.9702	113.507	-43.0449	-36.8219
37.9702	113.507	-43.915	-38.1619
37.9702	113.507	-43.915	-38.1619
37.9702	113.507	-37.5021	-32.3702
37.9702	113.507	-37.5021	-32.3702
37.9702	113.507	-35.7442	-30.4924
37.9702	113.508	-28.7436	-22.6409
37.9702	113.508	-29.6242	-23.4223
37.9702	113.508	-28.617	-21.8265
37.9702	113.508	-27.6935	-20.2307
37.9702	113.508	-26.018	-18.3909
37.9702	113.508	-25.1842	-18.9751
37.9702	113.508	-24.2764	-19.2915
37.9702	113.508	-23.7722	-19.3673
37.9702	113.509	-23.3681	-18.6638
37.9701	113.498	-0.82125	-0.395591
37.9701	113.499	-8.30484	-6.70277
37.9701	113.499	-16.4152	-14.0826
37.9701	113.499	-17.9747	-16.2279
37.9701	113.499	-21.5349	-19.3826
37.9701	113.499	-25.1562	-22.474
37.9701	113.499	-27.5833	-24.4929
37.9701	113.499	-29.8483	-26.5116
37.9701	113.499	-31.201	-27.6047
37.9701	113.5	-32.3664	-28.6979
37.9701	113.5	-34.2231	-30.6848
37.9701	113.5	-35.8953	-32.4287
37.9701	113.5	-37.5836	-34.1725
37.9701	113.5	-36.7653	-33.321
37.9701	113.5	-44.7153	-41.3534
37.9701	113.5	-46.6576	-43.3843
37.9701	113.501	-46.7274	-43.7688
37.9701	113.501	-46.8175	-44.1533
37.9701	113.501	-46.9278	-44.5378
37.9701	113.501	-48.7863	-46.3279
37.9701	113.501	-57.5319	-54.2507
37.9701	113.501	-56.3	-53.3585
37.9701	113.501	-55.1015	-52.4413
37.9701	113.502	-54.1237	-51.5241
37.9701	113.502	-53.6083	-50.8594
37.9701	113.502	-52.5606	-49.479
37.9701	113.502	-52.1027	-48.0985
37.9701	113.502	-52.267	-48.1917
37.9701	113.502	-51.6567	-49.799
37.9701	113.502	-52.0522	-51.0206
37.9701	113.502	-54.1122	-53.136
37.9701	113.503	-56.6312	-54.9478
37.9701	113.503	-59.1739	-58.3342
37.9701	113.503	-59.5068	-58.9387
37.9701	113.503	-62.3849	-61.6702
37.9701	113.503	-66.9044	-65.3937
37.9701	113.503	-72.2459	-69.7015
37.9701	113.503	-77.2398	-73.4192
37.9701	113.503	-79.4336	-75.1254
37.9701	113.504	-81.639	-76.8315
37.9701	113.504	-78.2393	-73.3221
37.9701	113.504	-73.6226	-69.6434
37.9701	113.504	-69.6436	-65.9647
37.9701	113.504	-69.123	-65.3697
37.9701	113.504	-68.7628	-64.7748
37.9701	113.504	-68.5304	-64.1799
37.9701	113.504	-66.9331	-62.6212
37.9701	113.505	-65.4645	-60.9446
37.9701	113.505	-64.35	-59.2681
37.9701	113.505	-62.895	-58.044
37.9701	113.505	-62.7634	-56.8847
37.9701	113.505	-61.5487	-55.7254
37.9701	113.505	-59.2741	-53.3848
37.9701	113.505	-57.0597	-51.0971
37.9701	113.505	-54.8091	-48.8095
37.9701	113.506	-52.8084	-46.5331
37.9701	113.506	-51.0242	-44.7474
37.9701	113.506	-49.2215	-42.9618
37.9701	113.506	-50.8141	-45.1337
37.9701	113.506	-48.4243	-42.4041
37.9701	113.506	-46.1363	-39.6745
37.9701	113.506	-43.7742	-36.7687
37.9701	113.506	-43.4562	-36.8473
37.9701	113.507	-43.2218	-36.926
37.9701	113.507	-43.084	-37.0046
37.9701	113.507	-43.084	-37.0046
37.9701	113.507	-39.8447	-34.5009
37.9701	113.507	-39.8447	-34.5009
37.9701	113.507	-36.0907	-30.682
37.9701	113.507	-31.2738	-25.8481
37.9701	113.508	-26.9067	-21.0143
37.9701	113.508	-28.2481	-22.247
37.9701	113.508	-28.2313	-21.8004
37.9701	113.508	-28.2692	-21.3539
37.9701	113.508	-26.3868	-19.8993
37.9701	113.508	-25.0103	-19.825
37.9701	113.508	-23.5663	-19.3419
37.9701	113.508	-23.1435	-18.9657
37.9701	113.509	-22.6641	-17.9659
37.9701	113.509	-20.7009	-15.3062
37.97	113.498	-0.445185	-0.748054
37.97	113.499	-7.14781	-6.4738
37.97	113.499	-14.5557	-12.9605
37.97	113.499	-17.1791	-15.4753
37.97	113.499	-21.3787	-19.1412
37.97	113.499	-25.1282	-22.5037
37.97	113.499	-27.515	-24.8677
37.97	113.499	-29.6323	-26.5674
37.97	113.499	-31.7704	-28.3009
37.97	113.5	-33.9253	-30.0344
37.97	113.5	-36.088	-32.0981
37.97	113.5	-36.2619	-32.4371
37.97	113.5	-36.5425	-32.7761
37.97	113.5	-35.2319	-31.5155
37.97	113.5	-37.8205	-34.3864
37.97	113.5	-39.9142	-36.8527
37.97	113.5	-42.0037	-39.2345
37.97	113.501	-42.3342	-39.627
37.97	113.501	-43.0662	-40.3375
37.97	113.501	-43.8732	-41.0479
37.97	113.501	-46.3953	-43.3934
37.97	113.501	-52.0516	-48.786
37.97	113.501	-57.8228	-54.1786
37.97	113.501	-57.409	-54.1189
37.97	113.501	-56.0818	-52.9489
37.97	113.502	-54.9987	-51.7788
37.97	113.502	-54.4215	-51.3663
37.97	113.502	-52.651	-49.6226
37.97	113.502	-51.5091	-47.7689
37.97	113.502	-51.8343	-48.0101
37.97	113.502	-53.1278	-49.6544
37.97	113.502	-54.4176	-50.9335
37.97	113.502	-54.8034	-50.751
37.97	113.503	-55.0961	-50.3988
37.97	113.503	-56.3506	-52.8861
37.97	113.503	-56.8164	-54.841
37.97	113.503	-60.5202	-59.3787
37.97	113.503	-65.4462	-63.6748
37.97	113.503	-71.816	-68.3801
37.97	113.503	-76.2264	-71.0423
37.97	113.503	-77.5081	-71.5819
37.97	113.504	-78.7646	-72.1215
37.97	113.504	-74.765	-68.5156
37.97	113.504	-69.8644	-64.9096
37.97	113.504	-65.7076	-61.3037
37.97	113.504	-66.9498	-62.6787
37.97	113.504	-68.4736	-64.198
37.97	113.504	-70.0914	-65.7172
37.97	113.504	-69.5368	-65.2115
37.97	113.505	-67.8483	-63.4187
37.97	113.505	-66.2868	-61.6259
37.97	113.505	-64.104	-59.744
37.97	113.505	-63.2429	-58.914
37.97	113.505	-63.4317	-58.084
37.97	113.505	-61.3313	-55.9961
37.97	113.505	-59.4477	-53.9993
37.97	113.505	-57.5149	-52.0025
37.97	113.506	-55.9801	-50.2455
37.97	113.506	-52.4862	-47.0274
37.97	113.506	-53.8018	-48.7306
37.97	113.506	-51.3082	-45.9381
37.97	113.506	-48.9397	-43.1456
37.97	113.506	-46.1687	-39.8704
37.97	113.506	-45.3117	-39.0337
37.97	113.507	-44.4366	-38.1969
37.97	113.507	-43.6234	-37.3602
37.97	113.507	-43.6234	-37.3602
37.97	113.507	-40.4783	-35.2725
37.97	113.507	-40.4783	-35.2725
37.97	113.507	-35.8691	-30.4972
37.97	113.507	-31.2093	-25.9869
37.97	113.508	-26.9111	-21.4767
37.97	113.508	-27.7638	-22.1841
37.97	113.508	-28.058	-22.2655
37.97	113.508	-28.1674	-22.2141
37.97	113.508	-26.2646	-20.9445
37.97	113.508	-24.5318	-20.174
37.97	113.508	-23.123	-19.2322
37.97	113.508	-23.0354	-18.839
37.97	113.509	-22.5907	-17.6547
37.97	113.509	-20.5423	-14.8904
37.9699	113.499	-4.6465	-5.01869
37.9699	113.499	-11.5765	-10.9757
37.9699	113.499	-14.3169	-13.5182
37.9699	113.499	-17.9506	-16.8754
37.9699	113.499	-22.4418	-20.2057
37.9699	113.499	-25.6393	-22.895
37.9699	113.499	-27.8612	-24.698
37.9699	113.499	-30.3665	-26.8803
37.9699	113.5	-32.9037	-29.0626
37.9699	113.5	-35.62	-31.5888
37.9699	113.5	-35.1265	-31.2203
37.9699	113.5	-34.4269	-30.6544
37.9699	113.5	-33.203	-29.4683
37.9699	113.5	-34.1404	-30.7411
37.9699	113.5	-35.3599	-32.5354
37.9699	113.5	-36.8805	-34.6776
37.9699	113.501	-37.6431	-35.6255
37.9699	113.501	-38.3795	-36.1245
37.9699	113.501	-39.1725	-36.6235
37.9699	113.501	-43.9681	-41.1023
37.9699	113.501	-51.1437	-48.0113
37.9699	113.501	-58.2892	-54.9204
37.9699	113.501	-58.5558	-55.3427
37.9699	113.501	-56.5359	-53.4923
37.9699	113.502	-54.6285	-51.6419
37.9699	113.502	-53.1816	-50.6214
37.9699	113.502	-51.46	-49.1302
37.9699	113.502	-49.9051	-47.367
37.9699	113.502	-49.8313	-47.5783
37.9699	113.502	-50.7646	-48.2279
37.9699	113.502	-50.3106	-48.5452
37.9699	113.502	-49.4914	-47.3541
37.9699	113.503	-48.7288	-46.163
37.9699	113.503	-50.2894	-48.1097
37.9699	113.503	-52.8476	-51.1491
37.9699	113.503	-57.9008	-56.238
37.9699	113.503	-63.4789	-61.2243
37.9699	113.503	-69.4092	-65.7049
37.9699	113.503	-72.8299	-67.463
37.9699	113.503	-73.4023	-66.9703
37.9699	113.504	-74.0103	-66.4775
37.9699	113.504	-71.8841	-64.7145
37.9699	113.504	-69.3289	-62.5505
37.9699	113.504	-65.2913	-59.7682
37.9699	113.504	-66.016	-61.3332
37.9699	113.504	-68.8956	-64.5866
37.9699	113.504	-71.1272	-67.0266
37.9699	113.504	-71.0736	-66.9942
37.9699	113.505	-68.4418	-64.4154
37.9699	113.505	-65.8611	-61.8365
37.9699	113.505	-63.2937	-59.3453
37.9699	113.505	-62.7166	-59.0181
37.9699	113.505	-62.5315	-58.691
37.9699	113.505	-61.9387	-57.5351
37.9699	113.505	-61.304	-56.1941
37.9699	113.505	-60.1092	-54.8531
37.9699	113.506	-60.1547	-54.6982
37.9699	113.506	-57.6859	-52.722
37.9699	113.506	-57.08	-52.3044
37.9699	113.506	-53.8504	-48.7941
37.9699	113.506	-50.6658	-45.2839
37.9699	113.506	-47.5144	-41.7736
37.9699	113.506	-46.6655	-40.7585
37.9699	113.507	-45.9113	-39.7435
37.9699	113.507	-45.0674	-38.7284
37.9699	113.507	-45.0674	-38.7284
37.9699	113.507	-41.6976	-36.5974
37.9699	113.507	-41.6976	-36.5974
37.9699	113.507	-37.7979	-32.5281
37.9699	113.507	-33.9319	-28.4587
37.9699	113.508	-29.6836	-24.3894
37.9699	113.508	-28.7427	-23.8075
[truncated: 1,934 more rows]
