# Supplementary material for: Mine subsidence monitoring and prediction integrating SBAS-InSAR technology and BO-Prophet model
Source: PeerJ journal article supplement (doi:10.7717/peerj-cs.3327), 2025-10-28
Supplement: Figure126.xlsx [file Figure126.xlsx]

## Sheet: Sheet1
Date	R2
2024-05-24	0.9962
2024-06-05	0.9957
2024-06-17	0.99475
2024-06-29	0.9938
2024-07-11	0.9909
2024-07-23	0.988
2024-08-04	0.967
